# Supplementary material for: Genomic epidemiology reveals multiple introductions of SARS-CoV-2 followed by community and nosocomial spread, Germany, February to May 2020
Source: PubMed Central journal article supplement (PMC8555370; doi:10.2807/1560-7917.es.2021.26.43.2002066), 2021-10-28
Supplement: 20-02066_MUENCHHOFF_Supplement.pdf [file 20-02066_MUENCHHOFF_Supplement.pdf]

## Supplementary Material

This supplementary material is hosted by Eurosurveillance as supporting information alongside the article “Genomic epidemiology reveals multiple introductions followed by community and nosocomial spread of SARS-CoV-2 in Bavaria, February to May 2020”, on behalf of the authors, who remain responsible for the accuracy and appropriateness of the content. The same standards for ethics, copyright, attributions and permissions as for the article apply. Supplements are not edited by Eurosurveillance and the journal is not responsible for the maintenance of any links or email addresses provided therein.

### Supplementary Figure S1. Divergence of branch of the phylogeny shown in Figure 2 panel A

First travel associated cases are indicated by skiing icons in relation to sequences from Italy, Austria and the rest of Germany (light blue) in a maximum likelihood phylogenetic tree.

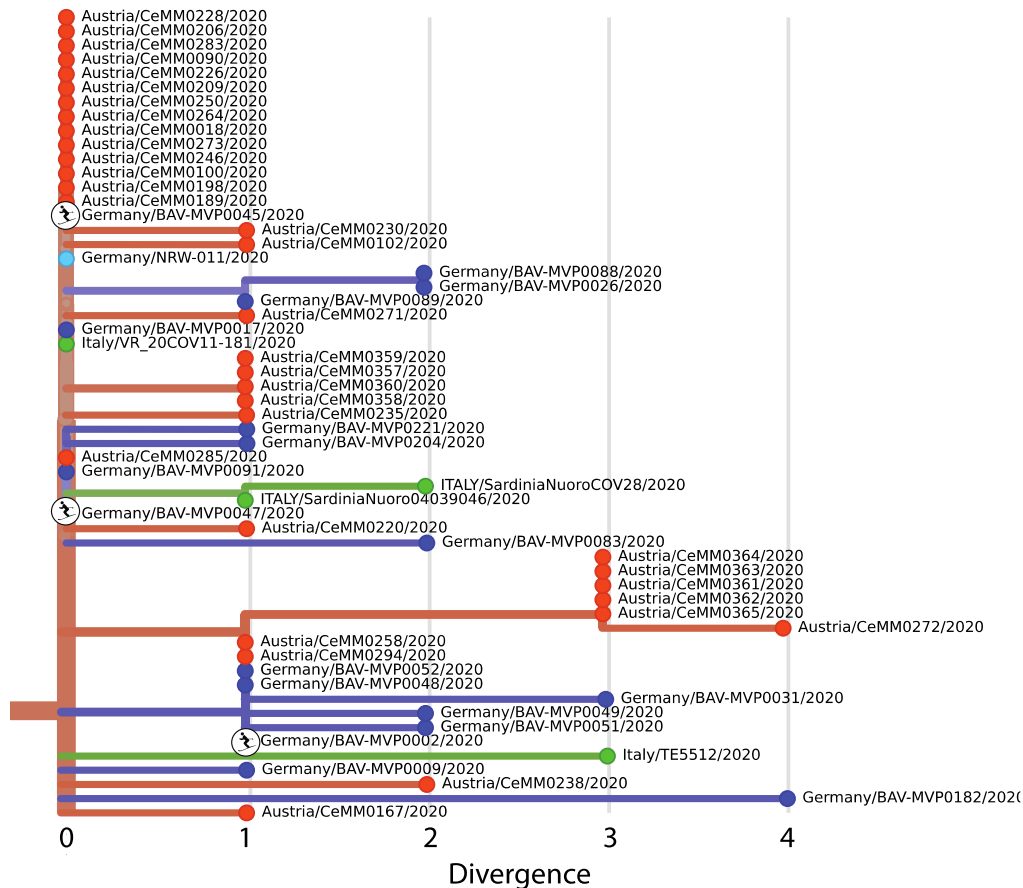

### Supplementary Figure S2. Divergence of branch of the phylogeny shown in Figure 2 panel B

First travel associated cases are indicated by skiing icons in relation to sequences from Italy, Austria and the rest of Germany (light blue) in a maximum likelihood phylogenetic tree.

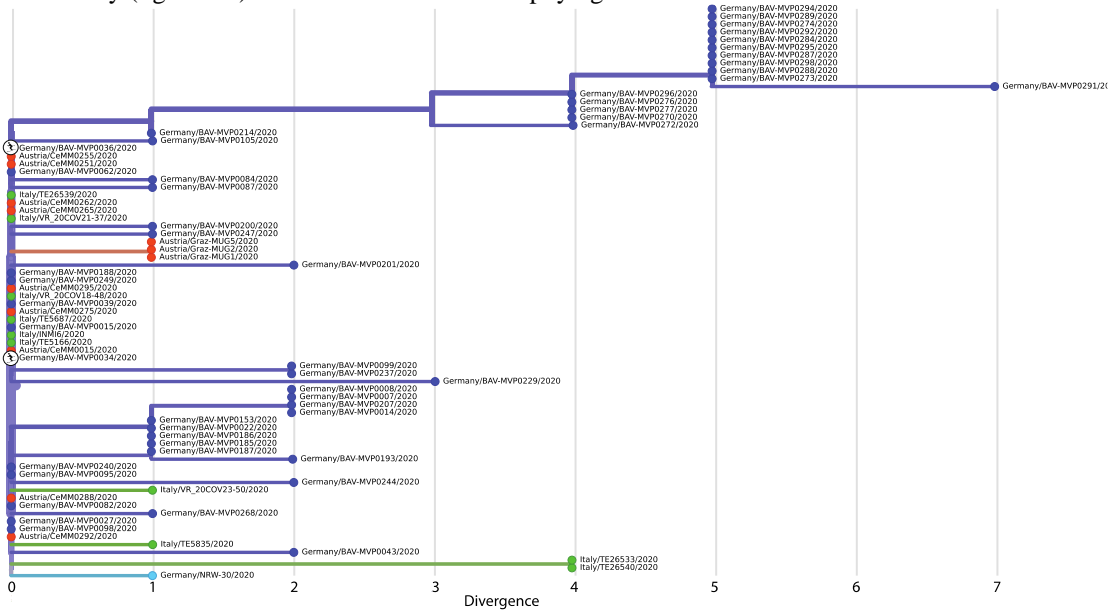

### Supplementary Figure S3. Divergence of branch of the phylogeny shown in Figure 2 panel C

First travel associated cases are indicated by skiing icons in relation to sequences from Italy, Austria and the rest of Germany (light blue) in a maximum likelihood phylogenetic tree.

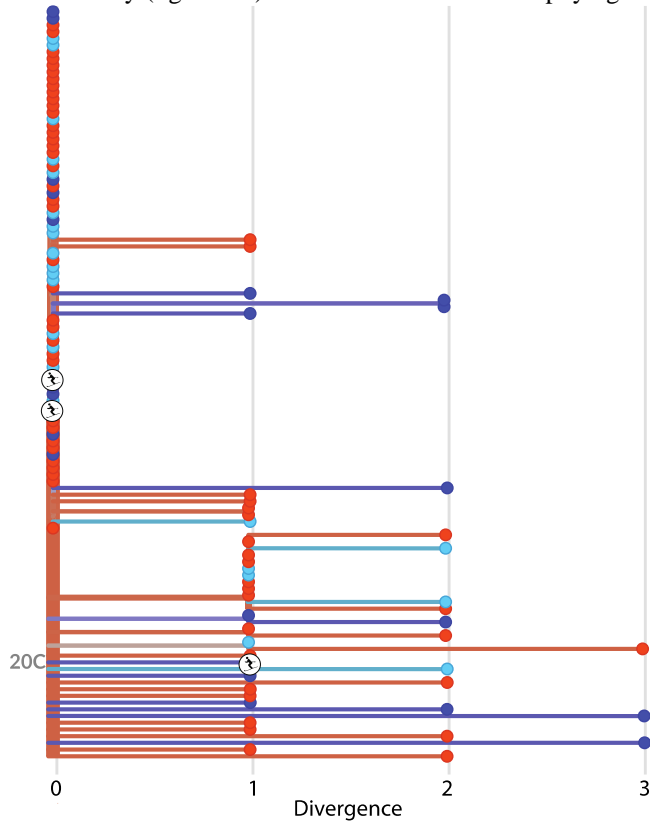

**Supplementary Figure S4. Phylogenetic relationship of SARS-CoV-2 genomes from Germany, Austria, Italy, France and Switzerland**

The 174 SARS-CoV-2 genomes obtained in this study (dark blue circles with red border) are shown in relation to subsampled sequences deposited at GISAID from Italy (green, n=136), Austria (red, n=250), France (orange, n=297), Switzerland (n=486) and the rest of Germany (light blue, n=78) in a time-resolved maximum likelihood phylogenetic tree.

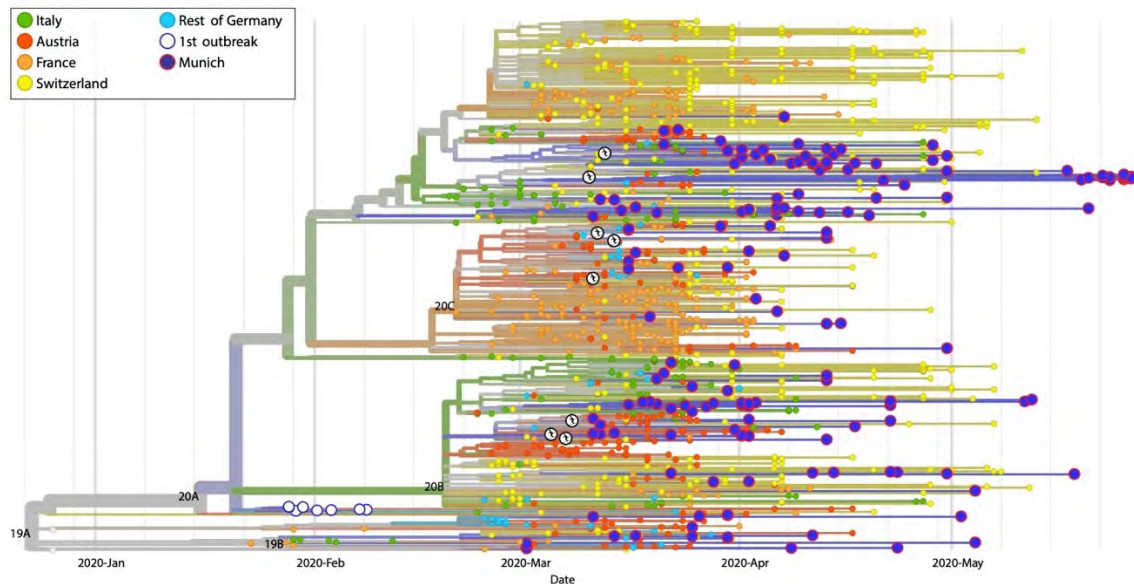

**Supplementary Table S1. Synopsis of Risk Category I, II and III contact classification**

| Category I                                                                                    | Category II                                                                         | Category III                                                                                                                                            |
|-----------------------------------------------------------------------------------------------|-------------------------------------------------------------------------------------|---------------------------------------------------------------------------------------------------------------------------------------------------------|
| Person with $\geq 15$ Min. face-to-face contact ( $\leq 1,5$ m)                               | People with $< 15$ Min. face-to-face contact (cumulative)                           | Staff $\leq 1.5$ m, with adequate protective clothing                                                                                                   |
| Probably relevant aerosol exposure, even at a greater distance from the index case than 1,5 m | Probably NOT relevant aerosol exposure in the room ( $> 1.5$ m from the index case) | Staff $> 1.5$ m, without adequate protective clothing, without direct contact with secretions or excretions of the patient and without aerosol exposure |
| Direct contact with secretions                                                                | Aircraft: within 2 rows in front/behind, but not Kat I                              | Contact of $\leq 1.5$ m when wearing medical MNS in both staff and MNS/MNB in patients without relevant aerosol production                              |

|                                                                                                                                                                        |                                                                                                                                              |  |
|------------------------------------------------------------------------------------------------------------------------------------------------------------------------|----------------------------------------------------------------------------------------------------------------------------------------------|--|
| Aircraft: direct seat neighbour                                                                                                                                        | Index case and contact person wear MNS or an MNB consistently and correctly in situations where 1.5 m minimum distance could not be observed |  |
| Medical staff $\leq$ 1.5 m, without adequate protective clothing                                                                                                       |                                                                                                                                              |  |
| Medical staff $>$ 1.5 m, without adequate protective clothing with direct contact with secretions or excretions of the patient or in case of possible aerosol exposure |                                                                                                                                              |  |

## Supplementary Methods

### SARS-CoV-2 whole-genome-sequencing

Amplicon pools from SARS-CoV-2 genomes were generated according to the ARTIC network nCoV-2019 sequencing protocol v2. cDNA was synthesized from isolated total RNA, amplicons were generated by two multiplex PCR reactions, pooled, diluted and quantified by Qubit DNA HS kit.

For nanopore sequencing 50 ng of the amplicon pool was end-repaired, barcoded and ligated to the nanopore sequencing adapter following the ARTIC network nCoV-2019 sequencing protocol v2. Barcoded pools of 24 samples were sequenced on a MinION R9.4.1 flowcell.

For Illumina sequencing amplicon pools were diluted to 0.2 ng/ul and tagmented with nextera XT library prep kit (Illumina, USA). Nextera libraries were dual-barcoded and sequenced on an Illumina HiSeq 1500 instrument.

### Sequence analysis using Nanopore sequencing

The Nanopore sequenced amplicons were assembled using the Artic bioinformatics protocol (<http://artic.network/ncov-2019>). Briefly, the amplicon-based reads were basecalled with the Guppy basecaller (v.3.6.0) provided by ONT using the high-accuracy DNA model and samples were demultiplexed according to the protocol. Per sample the reads were filtered by quality and a read length between 380 and 700 nt. Following the protocol, the consensus sequence for each sample was obtained using the '*minion*' subcommand of the *artic* tool with default settings. Shortly, the module aligns the reads to the Sars-Cov-2 reference genome sequence (MN908947.3) with minimap2, removes primer sequences and normalizes coverage for time improvements.<sup>1</sup> Variants were called with Nanopolish which were used to build the consensus sequence.<sup>2</sup>

## **Sequence analysis using Illumina**

Amplicon-based reads sequenced with the Illumina HiSeq 1500 sequencer were demultiplexed for each sample and mapped to the Sars-Cov-2 reference genome (MN908947.3) with *bwa-mem*. Consensus sequences were obtained using the *iVar* package.<sup>3</sup> The *iVar* pipeline first takes the mapped reads and trims the primer sequences using a BED file of primer positions converted from the ARTIC protocol repository. Further, reads were filtered by base quality >20 and a minimal length of 30nt. Pileup files were generated using *samtools*<sup>4</sup> and supplied to the consensus calling package within *iVar* with default settings.<sup>5</sup>

## **Variant calling**

Based on the sequencing technology SNV calling was achieved in the following way. For reads sequenced on the Illumina HiSeq 1500, SNV were called with *bcftools* included in the *samtools* package. The parameters were modified so that no Indels were called and a ploidy of two was used to distinguish mixed populations. For Nanopore sequenced reads SNVs were called using the variant package from *Nanopolish*.<sup>2</sup> Beside default settings, Indels were discarded, the homopolymer caller was enabled, a ploidy of two was used and the minimal distance from alignment end to calculate variants was set to 10 (--min-flanking-sequence=10).

To distinguish minority variants from sequencing errors, minority variants must have a minimal variant frequency of at least 20% to be considered. Sequence logos were generated from the variant frequency calls with the R package *ggseqlogo*.

## **Phylogenetic analyses**

Phylogenetic analyses were accomplished with a local instance of the web and analysis platform Auspice with the SARS-CoV-2 build (<https://github.com/nextstrain/ncov>) and the

bioinformatic toolkit *augur* (<https://github.com/nextstrain/augur>).<sup>6</sup> The consensus sequences as well as the meta-data were downloaded from GISAID (accession date 2020/06/06) with a total of 49,237 sequences obtained world-wide. Our sequenced samples were incorporated and all samples were analysed with the provided Snakefile in the repository using subsequent calls to the *augur* toolkit. Briefly, the steps within the Snakefile consist of filtering samples with a consensus sequence length of less than 90%. Further, the samples were aligned to the reference genome sequence (MN908947.3). For the generation of the global phylogenetic tree (as shown in figure 1) the sample size was reduced by subsampling a maximum of 30 samples for each country, year and month. The European phylogenetic tree (figure 2) was subsampled to a maximum of 400 samples for each country, year and month. In both trees all our samples were excluded from subsampling. GISAID accession numbers of the sequences used in figure 1 and figure 2 are summarized in Supplementary table 3 and 4 (appendix pp 9-99). The maximum likelihood tree was calculated with the tool *augur tree* which calls *IQ-TREE* (v.2.0.3). The resulting tree was refined by the toolkit *augur refine*, which uses internally *TreeTime* to reconstruct ancestral sequences and infer a time resolved phylogeny. Clade annotations were assigned using the *augur clades* command according to the Nextstrain classification consisting of currently five major clades. The Pangolin Tool was used on consensus sequences to assign pangolin lineages.

#### Supplementary references

1. Li H. Minimap2: pairwise alignment for nucleotide sequences. *Bioinformatics* 2018; **34**(18): 3094-100.
2. Loman NJ, Quick J, Simpson JT. A complete bacterial genome assembled de novo using only nanopore sequencing data. *Nat Methods* 2015; **12**(8): 733-5.
3. Grubaugh ND, Gangavarapu K, Quick J, et al. An amplicon-based sequencing framework for accurately measuring intrahost virus diversity using PrimalSeq and iVar. *Genome Biol* 2019; **20**(1): 8.

4. Li H.\*, Handsaker B.\*, Wysoker A., Fennell T., Ruan J., Homer N., Marth G., Abecasis G., Durbin R. and 1000 Genome Project Data Processing Subgroup (2009) The Sequence alignment/map (SAM) format and SAMtools. *Bioinformatics*, 25, 2078-9.
5. Li H. A statistical framework for SNP calling, mutation discovery, association mapping and population genetical parameter estimation from sequencing data. *Bioinformatics* 2011; **27**(21): 2987-93.
6. Hadfield J, Megill C, Bell SM, et al. Nextstrain: real-time tracking of pathogen evolution. *Bioinformatics* 2018; **34**(23): 4121-3.

**Supplementary Table S2. Metadata and accession numbers of sequenced isolates used for phylogenetic studies.**

Collection dates, gender, age, patient/staff status, genome coverage, sequencing technology, cluster analysis in this study, original sample material, country of likely exposure, probable transmission type and GISAID accession numbers are indicated for the 174 samples used for further phylogenetic studies.

| collection_date | gender | age | status  | coverage | technology         | cluster  | material            | country_exposure | covid19_infection_type | gisaid_accession_nr |
|-----------------|--------|-----|---------|----------|--------------------|----------|---------------------|------------------|------------------------|---------------------|
| 2020-03-17      | Male   | 90  | Patient | 99.65    | Illumina HiSeq1500 | Figure 4 | Nasopharyngeal Swab | Germany          | nursing_home_acquired  | EPI_ISL_437254      |
| 2020-03-07      | Female | 19  | Patient | 99.71    | Illumina HiSeq1500 |          | Nasopharyngeal Swab | Germany          | community_acquired     | EPI_ISL_437210      |
| 2020-03-23      | Male   | 46  | Patient | 99.71    | Illumina HiSeq1500 |          | Nasopharyngeal Swab | Germany          | community_acquired     | EPI_ISL_437237      |
| 2020-03-13      | Female | 30  | Staff   | 99.34    | Illumina HiSeq1500 | Figure 4 | Nasopharyngeal Swab | Germany          | hospital_acquired      | EPI_ISL_437233      |
| 2020-03-11      | Female | 30  | Staff   | 99.74    | Illumina HiSeq1500 | Figure 4 | Nasopharyngeal Swab | Germany          | hospital_acquired      | EPI_ISL_437246      |
| 2020-03-24      | Male   | 85  | Patient | 99.65    | Illumina HiSeq1500 | Figure 4 | Nasopharyngeal Swab | Germany          | hospital_acquired      | EPI_ISL_437263      |
| 2020-03-11      | Male   | 47  | Patient | 99.64    | Illumina HiSeq1500 |          | Nasopharyngeal Swab | Austria          | travel_associated      | EPI_ISL_437228      |
| 2020-03-14      | Male   | 56  | Patient | 99.65    | Illumina HiSeq1500 |          | Nasopharyngeal Swab | Austria          | travel_associated      | EPI_ISL_437229      |
| 2020-03-24      | Male   | 86  | Patient | 99.57    | Illumina HiSeq1500 |          | Nasopharyngeal Swab | Germany          | community_acquired     | EPI_ISL_437238      |
| 2020-03-11      | Female | 31  | Staff   | 99.65    | Illumina HiSeq1500 | Figure 4 | Nasopharyngeal Swab | Germany          | hospital_acquired      | EPI_ISL_437248      |
| 2020-03-12      | Female | 24  | Patient | 99.65    | Illumina HiSeq1500 |          | Nasopharyngeal Swab | Germany          | community_acquired     | EPI_ISL_437249      |
| 2020-03-12      | Male   | 29  | Staff   | 99.65    | Illumina HiSeq1500 | Figure 4 | Nasopharyngeal Swab | Germany          | hospital_acquired      | EPI_ISL_437250      |
| 2020-03-14      | Female | 29  | Staff   | 99.6     | Nanopore MinION    | Figure 4 | Nasopharyngeal Swab | Germany          | hospital_acquired      | EPI_ISL_420903      |
| 2020-03-14      | Male   | 82  | Patient | 99.66    | Illumina HiSeq1500 | Figure 4 | Nasopharyngeal Swab | Germany          | hospital_acquired      | EPI_ISL_437251      |



|            |        |    |         |       |                    |          |                              |             |                    |                |
|------------|--------|----|---------|-------|--------------------|----------|------------------------------|-------------|--------------------|----------------|
| 2020-03-16 | Female | 25 | Staff   | 99.57 | Illumina HiSeq1500 |          | Nasopharyngeal Swab          | Germany     | community_acquired | EPI_ISL_437252 |
| 2020-04-22 | Female | 55 | Staff   | 98.78 | Illumina HiSeq1500 | Figure 4 | Nasopharyngeal Swab          | Germany     | hospital_acquired  | EPI_ISL_466892 |
| 2020-03-11 | Male   | 65 | Patient | 99.51 | Illumina HiSeq1500 |          | Nasopharyngeal Swab          | Germany     | community_acquired | EPI_ISL_437245 |
| 2020-03-11 | Female | 34 | Staff   | 99.65 | Illumina HiSeq1500 | Figure 4 | Nasopharyngeal Swab          | Germany     | hospital_acquired  | EPI_ISL_437247 |
| 2020-03-11 | Male   | 69 | Patient | 96.01 | Illumina HiSeq1500 |          | Nasopharyngeal Swab          |             | unknown            | EPI_ISL_549025 |
| 2020-03-25 | Male   | 77 | Patient | 99.76 | Illumina HiSeq1500 |          | Sputum                       | Germany     | community_acquired | EPI_ISL_437264 |
| 2020-03-20 | Male   | 31 | Patient | 99.09 | Illumina HiSeq1500 |          | Nasopharyngeal Swab          | Germany     | community_acquired | EPI_ISL_437257 |
| 2020-03-16 | Male   | 47 | Staff   | 99.02 | Nanopore MinION    |          | Nasopharyngeal Swab          | Germany     | hospital_acquired  | EPI_ISL_420906 |
| 2020-03-19 | Female | 35 | Staff   | 97.26 | Nanopore MinION    |          | Nasopharyngeal Swab          | Germany     | hospital_acquired  | EPI_ISL_420909 |
| 2020-04-13 | Female | 80 | Patient | 93.9  | Illumina HiSeq1500 |          | Bronchoalveolar Lavage Fluid | Germany     | community_acquired | EPI_ISL_548950 |
| 2020-03-30 | Female | 68 | Patient | 99.6  | Illumina HiSeq1500 |          | Endotracheal Aspirate        | Germany     | community_acquired | EPI_ISL_437276 |
| 2020-03-14 | Male   | 38 | Patient | 89.68 | Illumina HiSeq1500 |          | Nasopharyngeal Swab          | Germany     | community_acquired | EPI_ISL_548951 |
| 2020-03-16 | Male   | 33 | Staff   | 99.66 | Illumina HiSeq1500 |          | Nasopharyngeal Swab          | Germany     | hospital_acquired  | EPI_ISL_437205 |
| 2020-04-02 | Male   | 78 | Patient | 99.63 | Illumina HiSeq1500 |          | Nasopharyngeal Swab          | Germany     | community_acquired | EPI_ISL_437239 |
| 2020-03-19 | Female | 38 | Patient | 99.65 | Illumina HiSeq1500 |          | Nasopharyngeal Swab          | Germany     | community_acquired | EPI_ISL_437255 |
| 2020-03-17 | Male   | 48 | Patient | 98.82 | Illumina HiSeq1500 |          | Nasopharyngeal Swab          |             | unknown            | EPI_ISL_451937 |
| 2020-03-16 | Female | 54 | Staff   | 99.02 | Nanopore MinION    |          | Nasopharyngeal Swab          | Germany     | hospital_acquired  | EPI_ISL_420907 |
| 2020-04-02 | Male   | 63 | Patient | 99.59 | Illumina HiSeq1500 |          | Endotracheal Aspirate        | Switzerland | travel_associated  | EPI_ISL_437284 |
| 2020-05-04 | Male   | 56 | Patient | 99.61 | Illumina HiSeq1500 |          | Nasopharyngeal Swab          | Austria     | travel_associated  | EPI_ISL_466906 |
| 2020-03-20 | Male   | 32 | Staff   | 97.93 | Illumina HiSeq1500 |          | Nasopharyngeal Swab          | Germany     | hospital_acquired  | EPI_ISL_451939 |
| 2020-04-06 | Male   | 70 | Patient | 97.66 | Illumina HiSeq1500 |          | Endotracheal Aspirate        | Germany     | community_acquired | EPI_ISL_466874 |
| 2020-03-22 | Female | 35 | Patient | 99.66 | Illumina HiSeq1500 |          | Nasopharyngeal Swab          | Germany     | community_acquired | EPI_ISL_437212 |
| 2020-03-22 | Female | 20 | Patient | 99.15 | Illumina HiSeq1500 |          | Sputum                       | Germany     | community_acquired | EPI_ISL_437236 |

|            |        |    |         |       |                    |          |                       |         |                       |                |
|------------|--------|----|---------|-------|--------------------|----------|-----------------------|---------|-----------------------|----------------|
| 2020-03-17 | Male   | 48 | Patient | 99.65 | Illumina HiSeq1500 |          | Nasopharyngeal Swab   |         | unknown               | EPI_ISL_437253 |
| 2020-04-03 | Female | 34 | Patient | 99.65 | Illumina HiSeq1500 |          | Nasopharyngeal Swab   | Germany | community_acquired    | EPI_ISL_437288 |
| 2020-03-21 | Female | 60 | Patient | 98.98 | Illumina HiSeq1500 |          | Nasopharyngeal Swab   | Germany | community_acquired    | EPI_ISL_437259 |
| 2020-04-02 | Male   | 59 | Staff   | 98.6  | Illumina HiSeq1500 |          | Sputum                |         | unknown               | EPI_ISL_451946 |
| 2020-03-23 | Male   | 46 | Staff   | 99.65 | Illumina HiSeq1500 |          | Nasopharyngeal Swab   | Germany | unknown               | EPI_ISL_451941 |
| 2020-03-22 | Male   | 46 | Patient | 99.46 | Illumina HiSeq1500 |          | Nasopharyngeal Swab   | Germany | community_acquired    | EPI_ISL_437262 |
| 2020-03-30 | Male   | 80 | Patient | 96.44 | Illumina HiSeq1500 |          | Nasopharyngeal Swab   | Germany | community_acquired    | EPI_ISL_451943 |
| 2020-03-31 | Male   | 63 | Patient | 99.65 | Illumina HiSeq1500 |          | Endotracheal Aspirate | Germany | community_acquired    | EPI_ISL_437232 |
| 2020-03-28 | Male   | 76 | Patient | 99.52 | Illumina HiSeq1500 |          | Nasopharyngeal Swab   | Germany | community_acquired    | EPI_ISL_437268 |
| 2020-03-29 | Male   | 43 | Patient | 99.11 | Illumina HiSeq1500 |          | Nasopharyngeal Swab   | Germany | community_acquired    | EPI_ISL_437270 |
| 2020-04-02 | Male   | 69 | Patient | 99.32 | Illumina HiSeq1500 |          | Endotracheal Aspirate | Germany | unknown               | EPI_ISL_437285 |
| 2020-03-30 | Male   | 59 | Patient | 99.19 | Illumina HiSeq1500 |          | Endotracheal Aspirate | Germany | community_acquired    | EPI_ISL_437273 |
| 2020-03-22 | Female | 50 | Patient | 99.72 | Illumina HiSeq1500 |          | Nasopharyngeal Swab   |         | unknown               | EPI_ISL_437260 |
| 2020-03-25 | Female | 91 | Patient | 99.65 | Illumina HiSeq1500 | Figure 4 | Nasopharyngeal Swab   | Germany | nursing_home_acquired | EPI_ISL_437231 |
| 2020-03-25 | Female | 92 | Patient | 98.78 | Illumina HiSeq1500 |          | Nasopharyngeal Swab   | Germany | community_acquired    | EPI_ISL_437265 |
| 2020-04-05 | Male   | 86 | Patient | 99.59 | Nanopore MinION    |          | Nasopharyngeal Swab   | Germany | hospital_acquired     | EPI_ISL_437213 |
| 2020-03-30 | Male   | 74 | Patient | 96.45 | Illumina HiSeq1500 |          | Nasopharyngeal Swab   | Germany | community_acquired    | EPI_ISL_451942 |
| 2020-03-28 | Female | 69 | Patient | 99.13 | Illumina HiSeq1500 |          | Nasopharyngeal Swab   | Germany | community_acquired    | EPI_ISL_437269 |
| 2020-04-01 | Female | 27 | Patient | 99.65 | Illumina HiSeq1500 |          | Nasopharyngeal Swab   | Germany | community_acquired    | EPI_ISL_437278 |
| 2020-04-01 | Male   | 61 | Patient | 99.54 | Illumina HiSeq1500 |          | Nasopharyngeal Swab   | Germany | community_acquired    | EPI_ISL_437281 |
| 2020-04-01 | Male   | 72 | Patient | 98.69 | Illumina HiSeq1500 |          | Nasopharyngeal Swab   | Germany | hospital_acquired     | EPI_ISL_451945 |
| 2020-04-02 | Male   | 59 | Patient | 99.54 | Illumina HiSeq1500 |          | Nasopharyngeal Swab   | Germany | community_acquired    | EPI_ISL_437283 |
| 2020-03-25 | Male   | 32 | Patient | 99.56 | Illumina HiSeq1500 |          | Nasopharyngeal Swab   | Germany | community_acquired    | EPI_ISL_452103 |
| 2020-04-01 | Female | 28 | Patient | 99.65 | Illumina HiSeq1500 |          | Nasopharyngeal Swab   | Germany | community_acquired    | EPI_ISL_437225 |

|            |        |    |         |       |                    |          |                       |         |                       |                |
|------------|--------|----|---------|-------|--------------------|----------|-----------------------|---------|-----------------------|----------------|
| 2020-04-03 | Male   | 51 | Staff   | 99.06 | Illumina HiSeq1500 |          | Nasopharyngeal Swab   | Germany | hospital_acquired     | EPI_ISL_437289 |
| 2020-03-23 | Male   | 29 | Patient | 99.28 | Illumina HiSeq1500 |          | Nasopharyngeal Swab   | Germany | community_acquired    | EPI_ISL_451940 |
| 2020-03-31 | Male   | 59 | Patient | 98.34 | Illumina HiSeq1500 |          | Nasopharyngeal Swab   | Germany | community_acquired    | EPI_ISL_451944 |
| 2020-04-04 | Male   | 63 | Staff   | 99.19 | Illumina HiSeq1500 |          | Nasopharyngeal Swab   | Germany | community_acquired    | EPI_ISL_452104 |
| 2020-04-13 | Male   | 69 | Patient | 99.65 | Illumina HiSeq1500 |          | Endotracheal Aspirate | Germany | community_acquired    | EPI_ISL_437227 |
| 2020-04-08 | Male   | 18 | Patient | 97.42 | Illumina HiSeq1500 |          | Nasopharyngeal Swab   | Germany | community_acquired    | EPI_ISL_451947 |
| 2020-04-09 | Female | 75 | Patient | 96.18 | Illumina HiSeq1500 |          | Endotracheal Aspirate | Germany | community_acquired    | EPI_ISL_437293 |
| 2020-03-29 | Male   | 43 | Staff   | 99.62 | Illumina HiSeq1500 |          | Nasopharyngeal Swab   |         | unknown               | EPI_ISL_437224 |
| 2020-04-07 | Female | 75 | Patient | 99.16 | Illumina HiSeq1500 |          | Nasopharyngeal Swab   | Germany | community_acquired    | EPI_ISL_437292 |
| 2020-04-11 | Male   | 63 | Patient | 99.65 | Illumina HiSeq1500 |          | Nasopharyngeal Swab   | Germany | community_acquired    | EPI_ISL_437243 |
| 2020-03-26 | Male   | 74 | Patient | 99.65 | Illumina HiSeq1500 |          | Nasopharyngeal Swab   | Germany | community_acquired    | EPI_ISL_437266 |
| 2020-04-01 | Male   | 56 | Patient | 99.71 | Illumina HiSeq1500 | Figure 4 | Nasopharyngeal Swab   | Germany | hospital_acquired     | EPI_ISL_437280 |
| 2020-04-01 | Male   | 0  | Patient | 99.65 | Illumina HiSeq1500 |          | Nasopharyngeal Swab   | Germany | community_acquired    | EPI_ISL_437282 |
| 2020-04-05 | Male   | 64 | Patient | 99.65 | Illumina HiSeq1500 |          | Nasopharyngeal Swab   | Germany | community_acquired    | EPI_ISL_437290 |
| 2020-04-03 | Male   | 59 | Patient | 99.1  | Illumina HiSeq1500 |          | Nasopharyngeal Swab   | Germany | community_acquired    | EPI_ISL_437287 |
| 2020-04-20 | Male   | 84 | Patient | 99.6  | Illumina HiSeq1500 |          | Nasopharyngeal Swab   | Germany | community_acquired    | EPI_ISL_466888 |
| 2020-04-12 | Male   | 79 | Patient | 98.86 | Illumina HiSeq1500 |          | Nasopharyngeal Swab   | Germany | nursing_home_acquired | EPI_ISL_437295 |
| 2020-04-11 | Male   | 54 | Patient | 99.66 | Illumina HiSeq1500 |          | Nasopharyngeal Swab   | Germany | hospital_acquired     | EPI_ISL_437217 |
| 2020-04-11 | Female | 70 | Patient | 99.24 | Illumina HiSeq1500 |          | Nasopharyngeal Swab   | Germany | hospital_acquired     | EPI_ISL_437222 |
| 2020-04-08 | Female | 67 | Patient | 99.63 | Illumina HiSeq1500 |          | Nasopharyngeal Swab   | Germany | community_acquired    | EPI_ISL_437215 |
| 2020-04-10 | Male   | 81 | Patient | 98.73 | Illumina HiSeq1500 |          | Nasopharyngeal Swab   | Germany | community_acquired    | EPI_ISL_437226 |
| 2020-04-07 | Female | 70 | Patient | 99.64 | Illumina HiSeq1500 |          | Nasopharyngeal Swab   | Germany | community_acquired    | EPI_ISL_437241 |
| 2020-04-07 | Male   | 81 | Patient | 99.65 | Illumina HiSeq1500 |          | Nasopharyngeal Swab   | Germany | community_acquired    | EPI_ISL_437214 |
| 2020-04-11 | Female | 86 | Patient | 99.6  | Nanopore MinION    |          | Nasopharyngeal Swab   | Germany | hospital_acquired     | EPI_ISL_437208 |

|            |        |    |         |       |                    |  |                       |         |                       |                |
|------------|--------|----|---------|-------|--------------------|--|-----------------------|---------|-----------------------|----------------|
| 2020-04-16 | Male   | 71 | Patient | 99.68 | Illumina HiSeq1500 |  | Endotracheal Aspirate | Germany | community_acquired    | EPI_ISL_466885 |
| 2020-04-13 | Male   | 30 | Patient | 99.64 | Illumina HiSeq1500 |  | Nasopharyngeal Swab   | Germany | community_acquired    | EPI_ISL_466878 |
| 2020-04-14 | Female | 71 | Patient | 99.46 | Illumina HiSeq1500 |  | Endotracheal Aspirate | Germany | hospital_acquired     | EPI_ISL_466881 |
| 2020-04-17 | Female | 48 | Patient | 98.08 | Illumina HiSeq1500 |  | Nasopharyngeal Swab   | Germany | community_acquired    | EPI_ISL_466886 |
| 2020-04-15 | Male   | 88 | Patient | 99.53 | Illumina HiSeq1500 |  | Nasopharyngeal Swab   | Germany | community_acquired    | EPI_ISL_466883 |
| 2020-04-17 | Female | 70 | Patient | 97.92 | Illumina HiSeq1500 |  | Nasopharyngeal Swab   | Germany | community_acquired    | EPI_ISL_466887 |
| 2020-04-12 | Male   | 55 | Patient | 94.46 | Illumina HiSeq1500 |  | Nasopharyngeal Swab   | Germany | community_acquired    | EPI_ISL_548952 |
| 2020-04-09 | Female | 37 | Patient | 99.62 | Illumina HiSeq1500 |  | Nasopharyngeal Swab   | Germany | community_acquired    | EPI_ISL_437207 |
| 2020-04-13 | Male   | 23 | Patient | 99.56 | Illumina HiSeq1500 |  | Nasopharyngeal Swab   | Germany | community_acquired    | EPI_ISL_437297 |
| 2020-04-13 | Female | 77 | Patient | 96.23 | Illumina HiSeq1500 |  | Nasopharyngeal Swab   | Germany | nursing_home_acquired | EPI_ISL_466876 |
| 2020-04-13 | Male   | 23 | Staff   | 99.49 | Illumina HiSeq1500 |  | Nasopharyngeal Swab   | Germany | community_acquired    | EPI_ISL_466877 |
| 2020-04-13 | Male   | 96 | Patient | 98.59 | Illumina HiSeq1500 |  | Nasopharyngeal Swab   | Germany | nursing_home_acquired | EPI_ISL_466879 |
| 2020-04-15 | Female | 95 | Patient | 98.97 | Illumina HiSeq1500 |  | Nasopharyngeal Swab   | Germany | community_acquired    | EPI_ISL_466882 |
| 2020-04-16 | Female | 57 | Patient | 99.08 | Illumina HiSeq1500 |  | Endotracheal Aspirate | Germany | community_acquired    | EPI_ISL_466884 |
| 2020-04-22 | Male   | 47 | Staff   | 99.65 | Illumina HiSeq1500 |  | Nasopharyngeal Swab   | Germany | hospital_acquired     | EPI_ISL_466891 |
| 2020-04-22 | Male   | 79 | Patient | 97.82 | Illumina HiSeq1500 |  | Nasopharyngeal Swab   | Germany | community_acquired    | EPI_ISL_466894 |
| 2020-04-23 | Male   | 27 | Patient | 99.15 | Illumina HiSeq1500 |  | Nasopharyngeal Swab   | Germany | community_acquired    | EPI_ISL_466895 |
| 2020-04-30 | Male   | 79 | Patient | 99.5  | Illumina HiSeq1500 |  | Endotracheal Aspirate | Germany | community_acquired    | EPI_ISL_466901 |
| 2020-04-14 | Male   | 60 | Patient | 92.37 | Illumina HiSeq1500 |  | Nasopharyngeal Swab   | Germany | community_acquired    | EPI_ISL_548953 |
| 2020-04-30 | Male   | 62 | Patient | 99.72 | Illumina HiSeq1500 |  | Nasopharyngeal Swab   | Germany | community_acquired    | EPI_ISL_466904 |
| 2020-04-13 | Male   | 36 | Staff   | 99.6  | Illumina HiSeq1500 |  | Nasopharyngeal Swab   | Germany | hospital_acquired     | EPI_ISL_466875 |
| 2020-04-24 | Female | 71 | Patient | 99.29 | Illumina HiSeq1500 |  | Nasopharyngeal Swab   | Germany | community_acquired    | EPI_ISL_466897 |
| 2020-04-13 | Female | 85 | Patient | 99.65 | Illumina HiSeq1500 |  | Nasopharyngeal Swab   | Germany | community_acquired    | EPI_ISL_437209 |
| 2020-05-02 | Male   | 73 | Patient | 99.63 | Illumina HiSeq1500 |  | Nasopharyngeal Swab   | Germany | community_acquired    | EPI_ISL_466905 |

|            |        |    |         |       |                    |          |                       |         |                       |                |
|------------|--------|----|---------|-------|--------------------|----------|-----------------------|---------|-----------------------|----------------|
| 2020-04-21 | Male   | 51 | Patient | 89.98 | Illumina HiSeq1500 |          | Nasopharyngeal Swab   | Germany | community_acquired    | EPI_ISL_548955 |
| 2020-04-19 | Male   | 61 | Patient | 99.39 | Illumina HiSeq1500 |          | Nasopharyngeal Swab   | Germany | community_acquired    | EPI_ISL_466889 |
| 2020-04-20 | Female | 59 | Staff   | 97.19 | Illumina HiSeq1500 |          | Nasopharyngeal Swab   | Germany | hospital_acquired     | EPI_ISL_466890 |
| 2020-04-28 | Male   | 56 | Patient | 98.86 | Illumina HiSeq1500 |          | Nasopharyngeal Swab   | Germany | community_acquired    | EPI_ISL_466899 |
| 2020-04-30 | Male   | 72 | Patient | 98.75 | Illumina HiSeq1500 |          | Nasopharyngeal Swab   | Germany | community_acquired    | EPI_ISL_466900 |
| 2020-04-30 | Female | 26 | Staff   | 99.81 | Illumina HiSeq1500 |          | Nasopharyngeal Swab   | Germany | unknown               | EPI_ISL_466902 |
| 2020-05-22 | Male   | 80 | Patient | 97.14 | Nanopore MinION    |          | Nasopharyngeal Swab   | Germany | hospital_acquired     | EPI_ISL_466915 |
| 2020-05-22 | Female | 89 | Patient | 99.43 | Nanopore MinION    |          | Nasopharyngeal Swab   | Germany | hospital_acquired     | EPI_ISL_466916 |
| 2020-05-22 | Female | 26 | Staff   | 91.71 | Nanopore MinION    |          | Nasopharyngeal Swab   | Germany | hospital_acquired     | EPI_ISL_548959 |
| 2020-04-28 | Male   | 42 | Staff   | 97.54 | Illumina HiSeq1500 |          | Nasopharyngeal Swab   | Germany | unknown               | EPI_ISL_466898 |
| 2020-05-04 | Female | 75 | Patient | 99.7  | Illumina HiSeq1500 |          | Endotracheal Aspirate | Germany | community_acquired    | EPI_ISL_466907 |
| 2020-05-17 | Female | 63 | Patient | 99.01 | Nanopore MinION    |          | Endotracheal Aspirate | Germany | community_acquired    | EPI_ISL_466910 |
| 2020-05-18 | Male   | 65 | Patient | 98.28 | Nanopore MinION    |          | Nasopharyngeal Swab   | Germany | nursing_home_acquired | EPI_ISL_466911 |
| 2020-05-23 | Female | 75 | Patient | 99.01 | Nanopore MinION    |          | Nasopharyngeal Swab   | Germany | community_acquired    | EPI_ISL_466918 |
| 2020-05-20 | Female | 41 | Staff   | 98.09 | Nanopore MinION    |          | Nasopharyngeal Swab   | Germany | hospital_acquired     | EPI_ISL_466913 |
| 2020-03-16 | Female | 42 | Staff   | 98.95 | Nanopore MinION    |          | Nasopharyngeal Swab   | Germany | hospital_acquired     | EPI_ISL_420905 |
| 2020-05-26 | Male   | 35 | Staff   | 99.59 | Nanopore MinION    |          | Nasopharyngeal Swab   | Germany | hospital_acquired     | EPI_ISL_466925 |
| 2020-05-26 | Male   | 47 | Staff   | 95.3  | Nanopore MinION    |          | Nasopharyngeal Swab   | Germany | hospital_acquired     | EPI_ISL_548958 |
| 2020-03-05 | Male   | 64 | Patient | 99.64 | Illumina HiSeq1500 | Figure 4 | Endotracheal Aspirate | Italy   | travel_associated     | EPI_ISL_437204 |
| 2020-05-20 | Male   | 81 | Patient | 97.29 | Nanopore MinION    |          | Nasopharyngeal Swab   | Germany | unknown               | EPI_ISL_466914 |
| 2020-05-25 | Male   | 57 | Patient | 99.01 | Nanopore           |          | Nasopharyngeal Swab   | Germany | community_acquired    | EPI_ISL_466921 |

|            |        |    |         |       |                    |  |                       |         |                    |                |
|------------|--------|----|---------|-------|--------------------|--|-----------------------|---------|--------------------|----------------|
|            |        |    |         |       | MinION             |  |                       |         |                    |                |
| 2020-05-25 | Female | 35 | Staff   | 99.59 | Nanopore MinION    |  | Nasopharyngeal Swab   | Germany | hospital_acquired  | EPI_ISL_466922 |
| 2020-05-25 | Female | 29 | Staff   | 99.58 | Nanopore MinION    |  | Nasopharyngeal Swab   | Germany | hospital_acquired  | EPI_ISL_466923 |
| 2020-05-11 | Female | 72 | Patient | 99.01 | Nanopore MinION    |  | Endotracheal Aspirate | Germany | community_acquired | EPI_ISL_466909 |
| 2020-05-25 | Female | 28 | Staff   | 94.37 | Nanopore MinION    |  | Nasopharyngeal Swab   | Germany | hospital_acquired  | EPI_ISL_548957 |
| 2020-05-12 | Male   | 60 | Patient | 91.84 | Nanopore MinION    |  | Endotracheal Aspirate | Germany | community_acquired | EPI_ISL_548956 |
| 2020-05-25 | Female | 79 | Patient | 99.01 | Nanopore MinION    |  | Nasopharyngeal Swab   | Germany | hospital_acquired  | EPI_ISL_466920 |
| 2020-03-16 | Male   | 54 | Staff   | 89.91 | Nanopore MinION    |  | Nasopharyngeal Swab   | Germany | hospital_acquired  | EPI_ISL_548961 |
| 2020-04-09 | Male   | 75 | Patient | 98.71 | Illumina HiSeq1500 |  | Nasopharyngeal Swab   | Germany | community_acquired | EPI_ISL_437242 |
| 2020-03-22 | Male   | 54 | Patient | 99.5  | Illumina HiSeq1500 |  | Nasopharyngeal Swab   | Germany | community_acquired | EPI_ISL_437261 |
| 2020-03-30 | Male   | 81 | Patient | 99.66 | Illumina HiSeq1500 |  | Endotracheal Aspirate | Germany | community_acquired | EPI_ISL_437275 |
| 2020-03-31 | Male   | 3  | Patient | 99.65 | Illumina HiSeq1500 |  | Nasopharyngeal Swab   | Germany | community_acquired | EPI_ISL_437277 |
| 2020-04-13 | Male   | 80 | Patient | 99.65 | Illumina HiSeq1500 |  | Endotracheal Aspirate | Germany | community_acquired | EPI_ISL_437296 |
| 2020-05-25 | Female | 70 | Patient | 99.01 | Nanopore MinION    |  | Nasopharyngeal Swab   | Germany | hospital_acquired  | EPI_ISL_466919 |
| 2020-04-02 | Female | 44 | Patient | 98.82 | Illumina HiSeq1500 |  | Nasopharyngeal Swab   | Germany | community_acquired | EPI_ISL_437286 |
| 2020-04-17 | Male   | 81 | Patient | 94.8  | Illumina HiSeq1500 |  | Nasopharyngeal Swab   | Germany | community_acquired | EPI_ISL_548954 |
| 2020-03-22 | Male   | 23 | Patient | 99.6  | Illumina HiSeq1500 |  | Nasopharyngeal Swab   | Germany | community_acquired | EPI_ISL_437230 |
| 2020-03-20 | Female | 47 | Staff   | 99.7  | Illumina HiSeq1500 |  | Nasopharyngeal Swab   | Germany | community_acquired | EPI_ISL_437258 |
| 2020-03-30 | Male   | 64 | Patient | 99.05 | Illumina HiSeq1500 |  | Nasopharyngeal Swab   | Germany | community_acquired | EPI_ISL_437271 |
| 2020-03-30 | Male   | 57 | Patient | 99.26 | Illumina HiSeq1500 |  | Endotracheal Aspirate | Germany | community_acquired | EPI_ISL_437274 |
| 2020-05-23 | Male   | 48 | Patient | 99.01 | Nanopore MinION    |  | Nasopharyngeal Swab   | Germany | community_acquired | EPI_ISL_466917 |
| 2020-03-21 | Male   | 52 | Patient | 99.6  | Nanopore           |  | Endotracheal Aspirate |         | unknown            | EPI_ISL_420912 |

|            |        |    |         |       |                    |          |                       |         |                    |                |
|------------|--------|----|---------|-------|--------------------|----------|-----------------------|---------|--------------------|----------------|
|            |        |    |         |       | MinION             |          |                       |         |                    |                |
| 2020-04-01 | Female | 73 | Patient | 99.63 | Illumina HiSeq1500 |          | Nasopharyngeal Swab   | Germany | community_acquired | EPI_ISL_437279 |
| 2020-03-27 | Male   | 77 | Patient | 99.75 | Illumina HiSeq1500 |          | Nasopharyngeal Swab   | Germany | hospital_acquired  | EPI_ISL_437267 |
| 2020-03-12 | Male   | 29 | Staff   | 99.65 | Illumina HiSeq1500 | Figure 4 | Nasopharyngeal Swab   | Austria | travel_associated  | EPI_ISL_437211 |
| 2020-03-21 | Male   | 55 | Patient | 99.37 | Illumina HiSeq1500 |          | Sputum                | Italy   | community_acquired | EPI_ISL_437235 |
| 2020-03-08 | Male   | 56 | Patient | 99.73 | Illumina HiSeq1500 |          | Nasopharyngeal Swab   | Italy   | travel_associated  | EPI_ISL_437244 |
| 2020-03-30 | Female | 33 | Patient | 99.61 | Illumina HiSeq1500 |          | Nasopharyngeal Swab   | Germany | community_acquired | EPI_ISL_437272 |
| 2020-03-12 | Female | 22 | Staff   | 99.7  | Illumina HiSeq1500 | Figure 4 | Nasopharyngeal Swab   | Germany | hospital_acquired  | EPI_ISL_437218 |
| 2020-04-06 | Male   | 61 | Patient | 99.66 | Illumina HiSeq1500 |          | Endotracheal Aspirate | Germany | community_acquired | EPI_ISL_437221 |
| 2020-03-20 | Male   | 60 | Patient | 99.55 | Illumina HiSeq1500 |          | Nasopharyngeal Swab   | Germany | hospital_acquired  | EPI_ISL_437256 |
| 2020-03-18 | Male   | 54 | Staff   | 99.66 | Illumina HiSeq1500 |          | Nasopharyngeal Swab   | Germany | community_acquired | EPI_ISL_437206 |
| 2020-04-09 | Male   | 65 | Patient | 99.66 | Illumina HiSeq1500 |          | Endotracheal Aspirate | Germany | community_acquired | EPI_ISL_437216 |
| 2020-04-06 | Female | 41 | Patient | 99.65 | Illumina HiSeq1500 |          | Sputum                | Germany | community_acquired | EPI_ISL_437220 |
| 2020-03-12 | Male   | 49 | Patient | 99.65 | Illumina HiSeq1500 |          | Nasopharyngeal Swab   | Austria | travel_associated  | EPI_ISL_437223 |
| 2020-04-06 | Male   | 72 | Patient | 97.08 | Illumina HiSeq1500 |          | Endotracheal Aspirate | Germany | community_acquired | EPI_ISL_437240 |
| 2020-04-23 | Female | 19 | Patient | 99.45 | Illumina HiSeq1500 |          | Nasopharyngeal Swab   | Germany | community_acquired | EPI_ISL_466896 |
| 2020-04-30 | Male   | 43 | Patient | 99.33 | Illumina HiSeq1500 |          | Nasopharyngeal Swab   | Germany | hospital_acquired  | EPI_ISL_466903 |
| 2020-05-19 | Male   | 29 | Patient | 98.01 | Nanopore MinION    |          | Nasopharyngeal Swab   | Germany | community_acquired | EPI_ISL_466912 |
| 2020-05-26 | Female | 46 | Staff   | 99.59 | Nanopore MinION    |          | Nasopharyngeal Swab   | Germany | hospital_acquired  | EPI_ISL_466924 |
| 2020-04-02 | Female | 60 | Patient | 99.56 | Illumina HiSeq1500 |          | Nasopharyngeal Swab   | Germany | community_acquired | EPI_ISL_437219 |
| 2020-03-15 | Male   | 63 | Patient | 99.65 | Illumina HiSeq1500 |          | Nasopharyngeal Swab   | Germany | community_acquired | EPI_ISL_437234 |
| 2020-04-06 | Male   | 63 | Patient | 99.65 | Illumina HiSeq1500 |          | Nasopharyngeal Swab   | Germany | community_acquired | EPI_ISL_437291 |
| 2020-04-13 | Male   | 62 | Patient | 99.66 | Illumina HiSeq1500 |          | Nasopharyngeal Swab   | Germany | hospital_acquired  | EPI_ISL_466880 |
| 2020-04-22 | Male   | 51 | Staff   | 98.67 | Illumina HiSeq1500 |          | Nasopharyngeal Swab   | Germany | community_acquired | EPI_ISL_466893 |











|                          |                |                                                                                       |                                                                                                |            |                                                                                                                                                                                                                                                                                                |
|--------------------------|----------------|---------------------------------------------------------------------------------------|------------------------------------------------------------------------------------------------|------------|------------------------------------------------------------------------------------------------------------------------------------------------------------------------------------------------------------------------------------------------------------------------------------------------|
| Brazil/IG0290/2020       | EPI_ISL_470596 | Simile                                                                                | Bioinformatics Laboratory / LNCC                                                               | 2020-04-03 | Alexandra Gerber et al                                                                                                                                                                                                                                                                         |
| Brazil/MT0225/2020       | EPI_ISL_470599 | Hermes Padirri                                                                        | Bioinformatics Laboratory / LNCC                                                               | 2020-03-19 | Alexandra Gerber et al                                                                                                                                                                                                                                                                         |
| Brazil/PA0232/2020       | EPI_ISL_470606 | Hermes Padirri                                                                        | Bioinformatics Laboratory / LNCC                                                               | 2020-04-02 | Alexandra Gerber et al                                                                                                                                                                                                                                                                         |
| Brazil/PA0235/2020       | EPI_ISL_470609 | Hermes Padirri                                                                        | Bioinformatics Laboratory / LNCC                                                               | 2020-04-03 | Alexandra Gerber et al                                                                                                                                                                                                                                                                         |
| Brazil/PI0239/2020       | EPI_ISL_470613 | Hermes Padirri                                                                        | Bioinformatics Laboratory / LNCC                                                               | 2020-03-19 | Alexandra Gerber et al                                                                                                                                                                                                                                                                         |
| Brazil/PR0241/2020       | EPI_ISL_470614 | Hermes Padirri                                                                        | Bioinformatics Laboratory / LNCC                                                               | 2020-04-02 | Alexandra Gerber et al                                                                                                                                                                                                                                                                         |
| Brazil/RJ-1056/2020      | EPI_ISL_456072 | Laboratory of Respiratory Viruses and Measles, Oswaldo Cruz Institute, FIOCRUZ        | Laboratory of Respiratory Viruses and Measles, Oswaldo Cruz Institute, FIOCRUZ                 | 2020-04-01 | Paola Resende et al C ( <a href="https://dx.doi.org/10.1101/2020.06.11.20128249">https://dx.doi.org/10.1101/2020.06.11.20128249</a> )                                                                                                                                                          |
| Brazil/RJ-1100/2020      | EPI_ISL_456075 | Laboratory of Respiratory Viruses and Measles, Oswaldo Cruz Institute, FIOCRUZ        | Laboratory of Respiratory Viruses and Measles, Oswaldo Cruz Institute, FIOCRUZ                 | 2020-04-02 | Paola Resende et al C ( <a href="https://dx.doi.org/10.1101/2020.06.11.20128249">https://dx.doi.org/10.1101/2020.06.11.20128249</a> )                                                                                                                                                          |
| Brazil/RJ-1119/2020      | EPI_ISL_456077 | LACEN RJ - Laboratório Central de Saúde Pública Noel Nutels                           | Laboratory of Respiratory Viruses and Measles, Oswaldo Cruz Institute, FIOCRUZ                 | 2020-03-25 | Paola Resende et al C ( <a href="https://dx.doi.org/10.1101/2020.06.11.20128249">https://dx.doi.org/10.1101/2020.06.11.20128249</a> )                                                                                                                                                          |
| Brazil/RJ-1464/2020      | EPI_ISL_456080 | Laboratory of Respiratory Viruses and Measles, Oswaldo Cruz Institute, FIOCRUZ        | Laboratory of Respiratory Viruses and Measles, Oswaldo Cruz Institute, FIOCRUZ                 | 2020-04-06 | Paola Resende et al C ( <a href="https://dx.doi.org/10.1101/2020.06.11.20128249">https://dx.doi.org/10.1101/2020.06.11.20128249</a> )                                                                                                                                                          |
| Brazil/RJ-2044/2020      | EPI_ISL_456101 | Laboratory of Respiratory Viruses and Measles, Oswaldo Cruz Institute, FIOCRUZ        | Laboratory of Respiratory Viruses and Measles, Oswaldo Cruz Institute, FIOCRUZ                 | 2020-04-15 | Paola Resende et al C ( <a href="https://dx.doi.org/10.1101/2020.06.11.20128249">https://dx.doi.org/10.1101/2020.06.11.20128249</a> )                                                                                                                                                          |
| Brazil/RJ-2062/2020      | EPI_ISL_456103 | Laboratory of Respiratory Viruses and Measles, Oswaldo Cruz Institute, FIOCRUZ        | Laboratory of Respiratory Viruses and Measles, Oswaldo Cruz Institute, FIOCRUZ                 | 2020-04-16 | Paola Resende et al C ( <a href="https://dx.doi.org/10.1101/2020.06.11.20128249">https://dx.doi.org/10.1101/2020.06.11.20128249</a> )                                                                                                                                                          |
| Brazil/RJ-2197/2020      | EPI_ISL_467349 | Laboratory of Respiratory Viruses and Measles, Oswaldo Cruz Institute, FIOCRUZ        | Laboratory of Respiratory Viruses and Measles, Oswaldo Cruz Institute, FIOCRUZ                 | 2020-04-17 | Paola Resende et al B                                                                                                                                                                                                                                                                          |
| Brazil/RJ-2663/2020      | EPI_ISL_467357 | Laboratory of Respiratory Viruses and Measles, Oswaldo Cruz Institute, FIOCRUZ        | Laboratory of Respiratory Viruses and Measles, Oswaldo Cruz Institute, FIOCRUZ                 | 2020-04-24 | Paola Resende et al B                                                                                                                                                                                                                                                                          |
| Brazil/RJ-2696/2020      | EPI_ISL_467359 | Laboratory of Respiratory Viruses and Measles, Oswaldo Cruz Institute, FIOCRUZ        | Laboratory of Respiratory Viruses and Measles, Oswaldo Cruz Institute, FIOCRUZ                 | 2020-04-24 | Paola Resende et al B                                                                                                                                                                                                                                                                          |
| Brazil/RJ-2840/2020      | EPI_ISL_467368 | Laboratory of Respiratory Viruses and Measles, Oswaldo Cruz Institute, FIOCRUZ        | Laboratory of Respiratory Viruses and Measles, Oswaldo Cruz Institute, FIOCRUZ                 | 2020-04-28 | Paola Resende et al B                                                                                                                                                                                                                                                                          |
| Brazil/RJ-2844/2020      | EPI_ISL_467369 | Laboratory of Respiratory Viruses and Measles, Oswaldo Cruz Institute, FIOCRUZ        | Laboratory of Respiratory Viruses and Measles, Oswaldo Cruz Institute, FIOCRUZ                 | 2020-04-28 | Paola Resende et al B                                                                                                                                                                                                                                                                          |
| Brazil/RJ-2847/2020      | EPI_ISL_467370 | Laboratory of Respiratory Viruses and Measles, Oswaldo Cruz Institute, FIOCRUZ        | Laboratory of Respiratory Viruses and Measles, Oswaldo Cruz Institute, FIOCRUZ                 | 2020-04-28 | Paola Resende et al B                                                                                                                                                                                                                                                                          |
| Brazil/RJ-2868/2020      | EPI_ISL_467371 | Laboratory of Respiratory Viruses and Measles, Oswaldo Cruz Institute, FIOCRUZ        | Laboratory of Respiratory Viruses and Measles, Oswaldo Cruz Institute, FIOCRUZ                 | 2020-04-28 | Paola Resende et al B                                                                                                                                                                                                                                                                          |
| Brazil/RJ-314/2020       | EPI_ISL_414045 | LACEN RJ - Laboratório Central de Saúde Pública Noel Nutels                           | Instituto Oswaldo Cruz FIOCRUZ - Laboratory of Respiratory Viruses and Measles (LVR5)          | 2020-03-04 | Paola Resende et al A ( <a href="https://dx.doi.org/10.1101/2020.05.23.20111443">https://dx.doi.org/10.1101/2020.05.23.20111443</a> )                                                                                                                                                          |
| Brazil/RJ-763/2020       | EPI_ISL_427302 | Instituto Oswaldo Cruz FIOCRUZ - Laboratory of Respiratory Viruses and Measles (LVR5) | Instituto Oswaldo Cruz FIOCRUZ - Laboratory of Respiratory Viruses and Measles (LVR5)          | 2020-03-20 | Paola Resende et al C ( <a href="https://dx.doi.org/10.1101/2020.06.11.20128249">https://dx.doi.org/10.1101/2020.06.11.20128249</a> )                                                                                                                                                          |
| Brazil/RJ-899/2020       | EPI_ISL_456071 | Laboratory of Respiratory Viruses and Measles, Oswaldo Cruz Institute, FIOCRUZ        | Laboratory of Respiratory Viruses and Measles, Oswaldo Cruz Institute, FIOCRUZ                 | 2020-03-30 | Paola Resende et al C ( <a href="https://dx.doi.org/10.1101/2020.06.11.20128249">https://dx.doi.org/10.1101/2020.06.11.20128249</a> )                                                                                                                                                          |
| Brazil/RJ116200/2020     | EPI_ISL_417282 | Universidade Federal do Rio de Janeiro                                                | Bioinformatics Laboratory - LNCC                                                               | 2020-03-19 | Filipe Romero et al                                                                                                                                                                                                                                                                            |
| Brazil/RJ025300/2020     | EPI_ISL_470621 | Laboratório de Virologia Molecular / UFRJ                                             | Bioinformatics Laboratory / LNCC                                                               | 2020-03-31 | Alexandra Gerber et al                                                                                                                                                                                                                                                                         |
| Brazil/RJ0256200/2020    | EPI_ISL_470624 | Laboratório de Virologia Molecular / UFRJ                                             | Bioinformatics Laboratory / LNCC                                                               | 2020-04-03 | Alexandra Gerber et al                                                                                                                                                                                                                                                                         |
| Brazil/RJ0266200/2020    | EPI_ISL_470632 | Laboratório de Virologia Molecular / UFRJ                                             | Bioinformatics Laboratory / LNCC                                                               | 2020-04-14 | Alexandra Gerber et al                                                                                                                                                                                                                                                                         |
| Brazil/RJ0267200/2020    | EPI_ISL_470633 | Laboratório de Virologia Molecular / UFRJ                                             | Bioinformatics Laboratory / LNCC                                                               | 2020-04-15 | Alexandra Gerber et al                                                                                                                                                                                                                                                                         |
| Brazil/RJ0268200/2020    | EPI_ISL_470634 | Laboratório de Virologia Molecular / UFRJ                                             | Bioinformatics Laboratory / LNCC                                                               | 2020-04-15 | Alexandra Gerber et al                                                                                                                                                                                                                                                                         |
| Brazil/RJ0273200/2020    | EPI_ISL_470639 | Laboratório de Virologia Molecular / UFRJ                                             | Bioinformatics Laboratory / LNCC                                                               | 2020-04-20 | Alexandra Gerber et al                                                                                                                                                                                                                                                                         |
| Brazil/RJ0275200/2020    | EPI_ISL_470641 | Laboratório de Virologia Molecular / UFRJ                                             | Bioinformatics Laboratory / LNCC                                                               | 2020-04-20 | Alexandra Gerber et al                                                                                                                                                                                                                                                                         |
| Brazil/RJ0242/2020       | EPI_ISL_470651 | Hermes Padirri                                                                        | Bioinformatics Laboratory / LNCC                                                               | 2020-03-20 | Alexandra Gerber et al                                                                                                                                                                                                                                                                         |
| Brazil/SC-769/2020       | EPI_ISL_427306 | LACEN-SC - Laboratório Central de Santa Catarina                                      | Instituto Oswaldo Cruz FIOCRUZ - Laboratory of Respiratory Viruses and Measles (LVR5)          | 2020-03-10 | Paola Resende et al A ( <a href="https://dx.doi.org/10.1101/2020.05.23.20111443">https://dx.doi.org/10.1101/2020.05.23.20111443</a> )                                                                                                                                                          |
| Brazil/SPR-01/2020       | EPI_ISL_412964 | Hospital Israelita Albert Einstein                                                    | Instituto Adolfo Lutz Interdisciplinary Procedures Center, Strategic Laboratory                | 2020-02-25 | Jacqueline Goes de Jesus et al ( <a href="https://virological.org/first-cases-of-coronavirus-disease-covid-19-in-brazil-south-america-2-genes-3rd-march-2020/469">https://virological.org/first-cases-of-coronavirus-disease-covid-19-in-brazil-south-america-2-genes-3rd-march-2020/469</a> ) |
| Brazil/SPR-03/2020       | EPI_ISL_414014 | Hospital Israelita Albert Einstein                                                    | Instituto Adolfo Lutz, Interdisciplinary Procedures Center, Strategic Laboratory               | 2020-03-02 | Claudio Tavares Sachi et al B ( <a href="https://dx.doi.org/10.1590/1678-9946/202002030">https://dx.doi.org/10.1590/1678-9946/202002030</a> )                                                                                                                                                  |
| Brazil/SPR-05/2020       | EPI_ISL_414016 | Hospital São Joaquim Beneficência Portuguesa                                          | Instituto Adolfo Lutz, Interdisciplinary Procedures Center, Strategic Laboratory               | 2020-02-29 | Claudio Tavares Sachi et al B ( <a href="https://dx.doi.org/10.1590/1678-9946/202002030">https://dx.doi.org/10.1590/1678-9946/202002030</a> )                                                                                                                                                  |
| Brazil/SPR-06/2020       | EPI_ISL_414015 | Hospital São Joaquim Beneficência Portuguesa                                          | Instituto Adolfo Lutz, Interdisciplinary Procedures Center, Strategic Laboratory               | 2020-02-29 | Claudio Tavares Sachi et al B ( <a href="https://dx.doi.org/10.1590/1678-9946/202002030">https://dx.doi.org/10.1590/1678-9946/202002030</a> )                                                                                                                                                  |
| Brazil/SPR-07/2020       | EPI_ISL_416028 | National Influenza Center - Instituto Adolfo Lutz                                     | Instituto Adolfo Lutz, Interdisciplinary Procedures Center, Strategic Laboratory               | 2020-03-03 | Claudio Tavares Sachi et al A ( <a href="https://dx.doi.org/10.1101/2020.05.23.20111443">https://dx.doi.org/10.1101/2020.05.23.20111443</a> )                                                                                                                                                  |
| Brazil/SPR-08/2020       | EPI_ISL_416029 | Laboratório Fleury                                                                    | Instituto Adolfo Lutz, Interdisciplinary Procedures Center, Strategic Laboratory               | 2020-03-04 | Claudio Tavares Sachi et al A ( <a href="https://dx.doi.org/10.1101/2020.05.23.20111443">https://dx.doi.org/10.1101/2020.05.23.20111443</a> )                                                                                                                                                  |
| Brazil/SPR-11/2020       | EPI_ISL_416033 | Hospital Israelita Albert Einstein                                                    | Instituto Adolfo Lutz, Interdisciplinary Procedures Center, Strategic Laboratory               | 2020-03-03 | Claudio Tavares Sachi et al A ( <a href="https://dx.doi.org/10.1101/2020.05.23.20111443">https://dx.doi.org/10.1101/2020.05.23.20111443</a> )                                                                                                                                                  |
| Brazil/SPR-12/2020       | EPI_ISL_416034 | Hospital Israelita Albert Einstein                                                    | Instituto Adolfo Lutz, Interdisciplinary Procedures Center, Strategic Laboratory               | 2020-03-04 | Claudio Tavares Sachi et al A ( <a href="https://dx.doi.org/10.1101/2020.05.23.20111443">https://dx.doi.org/10.1101/2020.05.23.20111443</a> )                                                                                                                                                  |
| Brazil/SPR-13/2020       | EPI_ISL_416036 | National Influenza Center - Instituto Adolfo Lutz                                     | Instituto Adolfo Lutz, Interdisciplinary Procedures Center, Strategic Laboratory               | 2020-03-05 | Claudio Tavares Sachi et al A ( <a href="https://dx.doi.org/10.1101/2020.05.23.20111443">https://dx.doi.org/10.1101/2020.05.23.20111443</a> )                                                                                                                                                  |
| Brazil/SPR-1402/2020     | EPI_ISL_468307 | Centro de Vigilância a Saude de Diadema                                               | Instituto Adolfo Lutz, Interdisciplinary Procedures Center, Strategic Laboratory               | 2020-04-08 | Claudio Tavares Sachi et al C                                                                                                                                                                                                                                                                  |
| Brazil/SPR-146/2020      | EPI_ISL_468311 | Hospital Municipal Dr Ignacio Proenca de Gouvea                                       | Instituto Adolfo Lutz, Interdisciplinary Procedures Center, Strategic Laboratory               | 2020-03-26 | Claudio Tavares Sachi et al C                                                                                                                                                                                                                                                                  |
| Brazil/SPR-147/2020      | EPI_ISL_468312 | Hospital Municipal Dr Ignacio Proenca de Gouvea                                       | Instituto Adolfo Lutz, Interdisciplinary Procedures Center, Strategic Laboratory               | 2020-03-26 | Claudio Tavares Sachi et al C                                                                                                                                                                                                                                                                  |
| Brazil/SPR-148/2020      | EPI_ISL_468313 | Vigilância Epidemiológica de São Bernardo do Campo                                    | Instituto Adolfo Lutz, Interdisciplinary Procedures Center, Strategic Laboratory               | 2020-03-23 | Claudio Tavares Sachi et al C                                                                                                                                                                                                                                                                  |
| Brazil/SPR-149/2020      | EPI_ISL_468314 | CTA Centro de Testagem e Aconselhamento                                               | Instituto Adolfo Lutz, Interdisciplinary Procedures Center, Strategic Laboratory               | 2020-03-26 | Claudio Tavares Sachi et al C                                                                                                                                                                                                                                                                  |
| Brunel/1/2020            | EPI_ISL_445187 | National Virology Reference Laboratory                                                | National Public Health Laboratory, National Centre for Infectious Diseases                     | 2020-03-11 | Mak Tze Min et al                                                                                                                                                                                                                                                                              |
| Brunel/2/2020            | EPI_ISL_435674 | National Virology Reference Laboratory                                                | National Public Health Laboratory, National Centre for Infectious Diseases                     | 2020-03-11 | Mak Tze Min et al                                                                                                                                                                                                                                                                              |
| Brunel/3/2020            | EPI_ISL_435675 | National Virology Reference Laboratory                                                | National Public Health Laboratory, National Centre for Infectious Diseases                     | 2020-03-11 | Mak Tze Min et al                                                                                                                                                                                                                                                                              |
| Brunel/4/2020            | EPI_ISL_435676 | National Virology Reference Laboratory                                                | National Public Health Laboratory, National Centre for Infectious Diseases                     | 2020-03-21 | Mak Tze Min et al                                                                                                                                                                                                                                                                              |
| Brunel/5/2020            | EPI_ISL_435677 | National Virology Reference Laboratory                                                | National Public Health Laboratory, National Centre for Infectious Diseases                     | 2020-03-21 | Mak Tze Min et al                                                                                                                                                                                                                                                                              |
| Bucaresti/ChVr7244/2020  | EPI_ISL_467778 | National Influenza Centre Romania                                                     | Charité Universitätsmedizin Berlin, Institute of Virology                                      | 2020-04-27 | Victor M Corman et al A                                                                                                                                                                                                                                                                        |
| Bucaresti/ChVr7245/2020  | EPI_ISL_467779 | National Influenza Centre Romania                                                     | Charité Universitätsmedizin Berlin, Institute of Virology                                      | 2020-04-27 | Victor M Corman et al A                                                                                                                                                                                                                                                                        |
| Cambodia/0012/2020       | EPI_ISL_411902 | Virology Unit, Institut Pasteur du Cambodge.                                          |                                                                                                | 2020-01-27 | Erik A Karlsson et al ( <a href="https://dx.doi.org/10.2807/1560-7917.ES.2020.25.13.200005">https://dx.doi.org/10.2807/1560-7917.ES.2020.25.13.200005</a> )                                                                                                                                    |
| Canada/BC_02421/2020     | EPI_ISL_415581 | BCDCD Public Health Laboratory                                                        | BCDCD Public Health Laboratory                                                                 | 2020-03-01 | Harrigan et al A                                                                                                                                                                                                                                                                               |
| Canada/BC_13297/2020     | EPI_ISL_415578 | BCDCD Public Health Laboratory                                                        | BCDCD Public Health Laboratory                                                                 | 2020-02-27 | Harrigan et al A                                                                                                                                                                                                                                                                               |
| Canada/BC_17397/2020     | EPI_ISL_415580 | BCDCD Public Health Laboratory                                                        | BCDCD Public Health Laboratory                                                                 | 2020-02-28 | Harrigan et al A                                                                                                                                                                                                                                                                               |
| Canada/BC_35720/2020     | EPI_ISL_415582 | BCDCD Public Health Laboratory                                                        | BCDCD Public Health Laboratory                                                                 | 2020-03-04 | Harrigan et al A                                                                                                                                                                                                                                                                               |
| Canada/BC_37_0-2/2020    | EPI_ISL_412965 | BCDCD Public Health Laboratory                                                        | BCDCD Public Health Laboratory                                                                 | 2020-02-16 | Harrigan et al B ( <a href="https://dx.doi.org/10.1002/jmv.25773">https://dx.doi.org/10.1002/jmv.25773</a> )                                                                                                                                                                                   |
| Canada/BC_380624/2020    | EPI_ISL_418819 | BCDCD Public Health Laboratory                                                        | BCDCD Public Health Laboratory                                                                 | 2020-03-09 | Harrigan et al A                                                                                                                                                                                                                                                                               |
| Canada/BC_454048/2020    | EPI_ISL_418829 | BCDCD Public Health Laboratory                                                        | BCDCD Public Health Laboratory                                                                 | 2020-03-10 | Harrigan et al A                                                                                                                                                                                                                                                                               |
| Canada/BC_5979789/2020   | EPI_ISL_418835 | BCDCD Public Health Laboratory                                                        | BCDCD Public Health Laboratory                                                                 | 2020-03-11 | Harrigan et al A                                                                                                                                                                                                                                                                               |
| Canada/BC_64686/2020     | EPI_ISL_415586 | BCDCD Public Health Laboratory                                                        | BCDCD Public Health Laboratory                                                                 | 2020-03-05 | Harrigan et al A                                                                                                                                                                                                                                                                               |
| Canada/BC_65034/2020     | EPI_ISL_415585 | BCDCD Public Health Laboratory                                                        | BCDCD Public Health Laboratory                                                                 | 2020-03-04 | Harrigan et al A                                                                                                                                                                                                                                                                               |
| Canada/BC_69243/2020     | EPI_ISL_415577 | BCDCD Public Health Laboratory                                                        | BCDCD Public Health Laboratory                                                                 | 2020-02-20 | Harrigan et al A                                                                                                                                                                                                                                                                               |
| Canada/BC_6981299/2020   | EPI_ISL_418841 | BCDCD Public Health Laboratory                                                        | BCDCD Public Health Laboratory                                                                 | 2020-03-11 | Harrigan et al A                                                                                                                                                                                                                                                                               |
| Canada/BC_6997898/2020   | EPI_ISL_418842 | BCDCD Public Health Laboratory                                                        | BCDCD Public Health Laboratory                                                                 | 2020-03-11 | Harrigan et al A                                                                                                                                                                                                                                                                               |
| Canada/NL_96/2020        | EPI_ISL_469235 | Public Health Laboratory                                                              | National Microbiology Laboratory                                                               | 2020-03-22 | Anna Majer et al                                                                                                                                                                                                                                                                               |
| Canada/NS_13/2020        | EPI_ISL_418814 | Queen Elizabeth II Health Science Centre                                              | National Microbiology Laboratory                                                               | 2020-03-13 | Anna Majer et al                                                                                                                                                                                                                                                                               |
| Canada/NS_31/2020        | EPI_ISL_429813 | Queen Elizabeth II Health Science Centre                                              | National Microbiology Laboratory                                                               | 2020-03-15 | Anna Majer et al                                                                                                                                                                                                                                                                               |
| Canada/ON_MJ0-S350/2020  | EPI_ISL_463983 | Toronto Invasive Bacterial Diseases Network                                           | McMaster University                                                                            | 2020-03-29 | Allison McGeer et al                                                                                                                                                                                                                                                                           |
| Canada/ON_PHL0743/2020   | EPI_ISL_418346 | Public Health Ontario Laboratories                                                    | Public Health Ontario Laboratories                                                             | 2020-03-07 | Alineza Eshghi et al                                                                                                                                                                                                                                                                           |
| Canada/ON_PHL0976/2020   | EPI_ISL_418378 | Public Health Ontario Laboratories                                                    | Public Health Ontario Laboratories                                                             | 2020-03-13 | Alineza Eshghi et al                                                                                                                                                                                                                                                                           |
| Canada/ON_PHL2259/2020   | EPI_ISL_418344 | Public Health Ontario Laboratories                                                    | Public Health Ontario Laboratories                                                             | 2020-02-29 | Alineza Eshghi et al                                                                                                                                                                                                                                                                           |
| Canada/ON_PHL2273/2020   | EPI_ISL_418383 | Public Health Ontario Laboratories                                                    | Public Health Ontario Laboratories                                                             | 2020-02-29 | Alineza Eshghi et al                                                                                                                                                                                                                                                                           |
| Canada/ON_PHL3380/2020   | EPI_ISL_418350 | Public Health Ontario Laboratories                                                    | Public Health Ontario Laboratories                                                             | 2020-03-20 | Alineza Eshghi et al                                                                                                                                                                                                                                                                           |
| Canada/ON_PHL3917/2020   | EPI_ISL_418322 | Public Health Ontario Laboratories                                                    | Public Health Ontario Laboratories                                                             | 2020-03-08 | Alineza Eshghi et al                                                                                                                                                                                                                                                                           |
| Canada/ON_PHL5472/2020   | EPI_ISL_418325 | Public Health Ontario Laboratories                                                    | Public Health Ontario Laboratories                                                             | 2020-02-20 | Alineza Eshghi et al                                                                                                                                                                                                                                                                           |
| Canada/ON_PHL5705/2020   | EPI_ISL_418336 | Public Health Ontario Laboratories                                                    | Public Health Ontario Laboratories                                                             | 2020-03-12 | Alineza Eshghi et al                                                                                                                                                                                                                                                                           |
| Canada/ON_PHL5930/2020   | EPI_ISL_418382 | Public Health Ontario Laboratories                                                    | Public Health Ontario Laboratories                                                             | 2020-02-28 | Alineza Eshghi et al                                                                                                                                                                                                                                                                           |
| Canada/ON_PHL8751/2020   | EPI_ISL_418345 | Public Health Ontario Laboratories                                                    | Public Health Ontario Laboratories                                                             | 2020-02-29 | Alineza Eshghi et al                                                                                                                                                                                                                                                                           |
| Canada/ON_OGLO-016/2020  | EPI_ISL_459873 | Kingston Health Sciences Center                                                       | Queen's Genomics Lab at Ongwanada (O-GLO)                                                      | 2020-03-26 | Spaarda CP et al                                                                                                                                                                                                                                                                               |
| Canada/ON_OGLO-017/2020  | EPI_ISL_459874 | Kingston Health Sciences Center                                                       | Queen's Genomics Lab at Ongwanada (O-GLO)                                                      | 2020-03-27 | Spaarda CP et al                                                                                                                                                                                                                                                                               |
| Canada/ON_OGLO-034/2020  | EPI_ISL_459885 | Kingston Health Sciences Center                                                       | Queen's Genomics Lab at Ongwanada (O-GLO)                                                      | 2020-03-29 | Spaarda CP et al                                                                                                                                                                                                                                                                               |
| Canada/ON_OGLO-042/2020  | EPI_ISL_459892 | Kingston Health Sciences Center                                                       | Queen's Genomics Lab at Ongwanada (O-GLO)                                                      | 2020-03-30 | Spaarda CP et al                                                                                                                                                                                                                                                                               |
| Canada/ON_SHSC-01/2020   | EPI_ISL_450747 | Sunnybrook Health Sciences Centre                                                     | Department of Laboratory Medicine and Molecular Diagnostics, Sunnybrook Health Sciences Centre | 2020-02-26 | James A. Nasir et al                                                                                                                                                                                                                                                                           |
| Canada/ON_UHTC_0005/2020 | EPI_ISL_464043 | Unity Health Toronto                                                                  | Ontario Institute for Cancer Research                                                          | 2020-03-24 | Ramzi Fattouh et al                                                                                                                                                                                                                                                                            |
| Canada/ON_UHTC_0021/2020 | EPI_ISL_464027 | Unity Health Toronto                                                                  | Ontario Institute for Cancer Research                                                          | 2020-03-30 | Ramzi Fattouh et al                                                                                                                                                                                                                                                                            |
| Canada/ON_UHTC_0024/2020 | EPI_ISL_464035 | Unity Health Toronto                                                                  | Ontario Institute for Cancer Research                                                          | 2020-04-01 | Ramzi Fattouh et al                                                                                                                                                                                                                                                                            |
| Canada/ON_UHTC_0029/2020 | EPI_ISL_464060 | Unity Health Toronto                                                                  | Ontario Institute for Cancer Research                                                          | 2020-04-01 | Ramzi Fattouh et al                                                                                                                                                                                                                                                                            |
| Canada/ON_UHTC_0035/2020 | EPI_ISL_464033 | Unity Health Toronto                                                                  | Ontario Institute for Cancer Research                                                          | 2020-04-07 | Ramzi Fattouh et al                                                                                                                                                                                                                                                                            |
| Canada/ON_UHTC_0041/2020 | EPI_ISL_464037 | Unity Health Toronto                                                                  | Ontario Institute for Cancer Research                                                          | 2020-04-03 | Ramzi Fattouh et al                                                                                                                                                                                                                                                                            |
| Canada/ON_UHTC_0049/2020 | EPI_ISL_464013 | Unity Health Toronto                                                                  | Ontario Institute for Cancer Research                                                          | 2020-04-05 | Ramzi Fattouh et al                                                                                                                                                                                                                                                                            |
| Canada/ON_UHTC_0066/2020 | EPI_ISL_464038 | Unity Health Toronto                                                                  | Ontario Institute for Cancer Research                                                          | 2020-04-24 | Ramzi Fattouh et al                                                                                                                                                                                                                                                                            |
| Canada/ON_UHTC_0068/2020 | EPI_ISL_464008 | Unity Health Toronto                                                                  | Ontario Institute for Cancer Research                                                          | 2020-04-28 | Ramzi Fattouh et al                                                                                                                                                                                                                                                                            |
| Canada/ON_UHTC_0070/2020 | EPI_ISL_464022 | Unity Health Toronto                                                                  | Ontario Institute for Cancer Research                                                          | 2020-04-12 | Ramzi Fattouh et al                                                                                                                                                                                                                                                                            |
| Canada/ON_UHTC_0081/2020 | EPI_ISL_464064 | Unity Health Toronto                                                                  | Ontario Institute for Cancer Research                                                          | 2020-04-29 | Ramzi Fattouh et al                                                                                                                                                                                                                                                                            |
| Canada/ON_UHTC_0089/2020 | EPI_ISL_464057 | Unity Health Toronto                                                                  | Ontario Institute for Cancer Research                                                          | 2020-04-19 | Ramzi Fattouh et al                                                                                                                                                                                                                                                                            |
| Canada/OC_AB7/2020       | EPI_ISL_444504 | Laboratoire de microbiologie, Hopital de Verdun                                       | Smith Laboratory, Centre de Recherche CHU Sainte-Justine                                       | 2020-04-05 | Martin Smith et al                                                                                                                                                                                                                                                                             |
| Canada/OC_AC3/2020       | EPI_ISL_444507 | Laboratoire de microbiologie, Hopital de Verdun                                       | Smith Laboratory, Centre de Recherche CHU Sainte-Justine                                       | 2020-04-06 | Martin Smith et al                                                                                                                                                                                                                                                                             |
| Canada/OC_AC5/2020       | EPI_ISL_444508 | Laboratoire de microbiologie, Hopital de Verdun                                       | Smith Laboratory, Centre de Recherche CHU Sainte-Justine                                       | 2020-04-04 | Martin Smith et al                                                                                                                                                                                                                                                                             |
| Canada/OC_AE8/2020       | EPI_ISL_463907 | Laboratoire de microbiologie, Hopital de Verdun                                       | Smith Laboratory, Centre de Recherche CHU Sainte-Justine                                       | 2020-04-07 | Martin Smith et al                                                                                                                                                                                                                                                                             |
| Canada/OC_AF6/2020       | EPI_ISL_463912 | Laboratoire de microbiologie, Hopital de Verdun                                       | Smith Laboratory, Centre de Recherche CHU Sainte-Justine                                       | 2020-04-06 | Martin Smith et al                                                                                                                                                                                                                                                                             |
| Canada/OC_AR5/2020       | EPI_ISL_463932 | Laboratoire de microbiologie, Hopital de Verdun                                       | Smith Laboratory, Centre de Recherche CHU Sainte-Justine                                       | 2020-04-04 | Martin Smith et al                                                                                                                                                                                                                                                                             |
| Canada/OC_AR6/2020       | EPI_ISL_463933 | Laboratoire de microbiologie, Hopital de Verdun                                       | Smith Laboratory, Centre de Recherche CHU Sainte-Justine                                       | 2020-04-01 | Martin Smith et al                                                                                                                                                                                                                                                                             |
| Canada/OC_AR9/2020       | EPI_ISL_463934 | Laboratoire de microbiologie, Hopital de Verdun                                       | Smith Laboratory, Centre de Recherche CH                                                       |            |                                                                                                                                                                                                                                                                                                |

|                                |               |                                                                                                                                                          |                                                                                                                                                                                                                                                               |            |                                                                                                                                                                        |
|--------------------------------|---------------|----------------------------------------------------------------------------------------------------------------------------------------------------------|---------------------------------------------------------------------------------------------------------------------------------------------------------------------------------------------------------------------------------------------------------------|------------|------------------------------------------------------------------------------------------------------------------------------------------------------------------------|
| Canada/QC_AY6/2020             | EPI_SL_46350  | Laboratoire de microbiologie, Hôpital de Verdun                                                                                                          | Smith Laboratory, Centre de Recherche CHU Sainte-Justine                                                                                                                                                                                                      | 2020-04-04 | Martin Smith et al                                                                                                                                                     |
| Canada/QC_AY9/2020             | EPI_SL_46351  | Laboratoire de microbiologie, Hôpital de Verdun                                                                                                          | Smith Laboratory, Centre de Recherche CHU Sainte-Justine                                                                                                                                                                                                      | 2020-04-04 | Martin Smith et al                                                                                                                                                     |
| Canada/QC_AY8/2020             | EPI_SL_46356  | Laboratoire de microbiologie, Hôpital de Verdun                                                                                                          | Smith Laboratory, Centre de Recherche CHU Sainte-Justine                                                                                                                                                                                                      | 2020-04-12 | Martin Smith et al                                                                                                                                                     |
| Canada/QC_AZ1/2020             | EPI_SL_46358  | Laboratoire de microbiologie, Hôpital de Verdun                                                                                                          | Smith Laboratory, Centre de Recherche CHU Sainte-Justine                                                                                                                                                                                                      | 2020-04-12 | Martin Smith et al                                                                                                                                                     |
| Canada/QC_AZ9/2020             | EPI_SL_46361  | Laboratoire de microbiologie, Hôpital de Verdun                                                                                                          | Smith Laboratory, Centre de Recherche CHU Sainte-Justine                                                                                                                                                                                                      | 2020-04-14 | Martin Smith et al                                                                                                                                                     |
| Canada/QC_BC3/2020             | EPI_SL_46367  | Laboratoire de microbiologie, Hôpital de Verdun                                                                                                          | Smith Laboratory, Centre de Recherche CHU Sainte-Justine                                                                                                                                                                                                      | 2020-04-09 | Martin Smith et al                                                                                                                                                     |
| Canada/QC_AJ7/2020             | EPI_SL_450639 | Laboratoire de microbiologie, Hôpital de Verdun                                                                                                          | Smith Laboratory, Centre de Recherche CHU Sainte-Justine                                                                                                                                                                                                      | 2020-04-11 | Martin Smith et al                                                                                                                                                     |
| Canada/QC_AK2/2020             | EPI_SL_450641 | Laboratoire de microbiologie, Hôpital de Verdun                                                                                                          | Smith Laboratory, Centre de Recherche CHU Sainte-Justine                                                                                                                                                                                                      | 2020-04-07 | Martin Smith et al                                                                                                                                                     |
| Canada/QC_AK3/2020             | EPI_SL_450642 | Laboratoire de microbiologie, Hôpital de Verdun                                                                                                          | Smith Laboratory, Centre de Recherche CHU Sainte-Justine                                                                                                                                                                                                      | 2020-04-08 | Martin Smith et al                                                                                                                                                     |
| Canada/QC_AL9/2020             | EPI_SL_450652 | Laboratoire de microbiologie, Hôpital de Verdun                                                                                                          | Smith Laboratory, Centre de Recherche CHU Sainte-Justine                                                                                                                                                                                                      | 2020-04-10 | Martin Smith et al                                                                                                                                                     |
| Canada/Qc-L00240866/2020       | EPI_SL_465690 | Centre hospitalier Anna-Laberge                                                                                                                          | Laboratoire de santé publique du Québec                                                                                                                                                                                                                       | 2020-03-27 | Sandrine Moreira et al                                                                                                                                                 |
| Canada/Qc-L00241115/2020       | EPI_SL_465698 | Hôpital Charles-LeMoine                                                                                                                                  | Laboratoire de santé publique du Québec                                                                                                                                                                                                                       | 2020-03-27 | Sandrine Moreira et al                                                                                                                                                 |
| Canada/Qc-L00241344/2020       | EPI_SL_450317 | Hôpital Pierre-Boucher                                                                                                                                   | Laboratoire de santé publique du Québec                                                                                                                                                                                                                       | 2020-03-27 | Sandrine Moreira et al                                                                                                                                                 |
| canine/HongKong/20-03695/2020  | EPI_SL_450403 |                                                                                                                                                          | School of Public Health                                                                                                                                                                                                                                       | 2020-03-18 | Sit et al                                                                                                                                                              |
| Chile/Artoflaga, 1/2020        | EPI_SL_445266 | CENTRO ONCOLOGICO DEL NORTE                                                                                                                              | Instituto de Salud Publica de Chile                                                                                                                                                                                                                           | 2020-03-12 | Andrés E Castillo et al                                                                                                                                                |
| Chile/Chilán, 4/2020           | EPI_SL_445378 | HOSPITAL DE BULNES                                                                                                                                       | Instituto de Salud Publica de Chile                                                                                                                                                                                                                           | 2020-04-04 | Andrés E Castillo et al                                                                                                                                                |
| Chile/Concepcion, 2/2020       | EPI_SL_445333 | LABORATORIO CLINICA UNIVERSITARIA DE CONCEPCION                                                                                                          | Instituto de Salud Publica de Chile                                                                                                                                                                                                                           | 2020-03-12 | Andrés E Castillo et al                                                                                                                                                |
| Chile/Copapo-00015/2020        | EPI_SL_468754 | Laboratorio de Biología Molecular, Facultad de Medicina, Universidad de Atacama                                                                          | Center for Mathematical Modeling and Center for Genome Regulation, Santiago, Chile                                                                                                                                                                            | 2020-04-29 | Gaete A et al                                                                                                                                                          |
| Chile/Copapo-00007/2020        | EPI_SL_468755 | Laboratorio de Biología Molecular, Facultad de Medicina, Universidad de Atacama                                                                          | Center for Mathematical Modeling and Center for Genome Regulation, Santiago, Chile                                                                                                                                                                            | 2020-04-29 | Gaete A et al                                                                                                                                                          |
| Chile/Copapo-00014/2020        | EPI_SL_468756 | Laboratorio de Biología Molecular, Facultad de Medicina, Universidad de Atacama                                                                          | Center for Mathematical Modeling and Center for Genome Regulation, Santiago, Chile                                                                                                                                                                            | 2020-04-30 | Gaete A et al                                                                                                                                                          |
| Chile/Copapo-00015/2020        | EPI_SL_468757 | Laboratorio de Biología Molecular, Facultad de Medicina, Universidad de Atacama                                                                          | Center for Mathematical Modeling and Center for Genome Regulation, Santiago, Chile                                                                                                                                                                            | 2020-04-30 | Gaete A et al                                                                                                                                                          |
| Chile/Copapo-00063/2020        | EPI_SL_468758 | Laboratorio de Biología Molecular, Facultad de Medicina, Universidad de Atacama                                                                          | Center for Mathematical Modeling and Center for Genome Regulation, Santiago, Chile                                                                                                                                                                            | 2020-05-01 | Gaete A et al                                                                                                                                                          |
| Chile/Copapo-00064/2020        | EPI_SL_468759 | Laboratorio de Biología Molecular, Facultad de Medicina, Universidad de Atacama                                                                          | Center for Mathematical Modeling and Center for Genome Regulation, Santiago, Chile                                                                                                                                                                            | 2020-05-01 | Gaete A et al                                                                                                                                                          |
| Chile/Huasco-00013/2020        | EPI_SL_468753 | Laboratorio de Biología Molecular, Facultad de Medicina, Universidad de Atacama                                                                          | Center for Mathematical Modeling and Center for Genome Regulation, Santiago, Chile                                                                                                                                                                            | 2020-04-29 | Gaete A et al                                                                                                                                                          |
| Chile/Independencia-27991/2020 | EPI_SL_459857 | Center for Genome Regulation (CRG)                                                                                                                       | Center for Mathematical Modeling and Center for Genome Regulation, Santiago, Chile                                                                                                                                                                            | 2020-03-15 | Gaete A et al                                                                                                                                                          |
| Chile/Punta_Arenas_8/2020      | EPI_SL_445289 | HOSPITAL NAVAL PUERTO WILLIAMS                                                                                                                           | Instituto de Salud Publica de Chile                                                                                                                                                                                                                           | 2020-03-20 | Andrés E Castillo et al                                                                                                                                                |
| Chile/Rancagua, 1/2020         | EPI_SL_445273 | LABORATORIO TORRE MEDICA LTDA.                                                                                                                           | Instituto de Salud Publica de Chile                                                                                                                                                                                                                           | 2020-03-16 | Andrés E Castillo et al                                                                                                                                                |
| Chile/Rancagua, 6/2020         | EPI_SL_445278 | LABORATORIO TORRE MEDICA LTDA.                                                                                                                           | Instituto de Salud Publica de Chile                                                                                                                                                                                                                           | 2020-03-16 | Andrés E Castillo et al                                                                                                                                                |
| Chile/Rancagua, 7/2020         | EPI_SL_445297 | CLINICA INTEGRAL S.A.                                                                                                                                    | Instituto de Salud Publica de Chile                                                                                                                                                                                                                           | 2020-03-21 | Andrés E Castillo et al                                                                                                                                                |
| Chile/Santiago, 14/2020        | EPI_SL_445257 | CLINICA TABANCURA                                                                                                                                        | Instituto de Salud Publica de Chile                                                                                                                                                                                                                           | 2020-03-10 | Andrés E Castillo et al                                                                                                                                                |
| Chile/Santiago, 17/2020        | EPI_SL_445260 | CLINICA ALEMANA DE SANTIAGO S.A.                                                                                                                         | Instituto de Salud Publica de Chile                                                                                                                                                                                                                           | 2020-03-11 | Andrés E Castillo et al                                                                                                                                                |
| Chile/Santiago, 18/2020        | EPI_SL_445261 | INTEGRAMEDICA LAB. CLINICO LTDA.                                                                                                                         | Instituto de Salud Publica de Chile                                                                                                                                                                                                                           | 2020-03-11 | Andrés E Castillo et al                                                                                                                                                |
| Chile/Santiago, 19/2020        | EPI_SL_445262 | CLINICA TABANCURA                                                                                                                                        | Instituto de Salud Publica de Chile                                                                                                                                                                                                                           | 2020-03-11 | Andrés E Castillo et al                                                                                                                                                |
| Chile/Santiago, 21/2020        | EPI_SL_445264 | CLINICA REDSALUD VITACURA.                                                                                                                               | Instituto de Salud Publica de Chile                                                                                                                                                                                                                           | 2020-03-12 | Andrés E Castillo et al                                                                                                                                                |
| Chile/Santiago, 22/2020        | EPI_SL_445265 | PONTIFICIA UNIVERSIDAD CATOLICA DE CHILE                                                                                                                 | Instituto de Salud Publica de Chile                                                                                                                                                                                                                           | 2020-03-11 | Andrés E Castillo et al                                                                                                                                                |
| Chile/Santiago, 27/2020        | EPI_SL_445306 | CLINICA UC SAN CARLOS DE APOQUINDO                                                                                                                       | Instituto de Salud Publica de Chile                                                                                                                                                                                                                           | 2020-03-16 | Andrés E Castillo et al                                                                                                                                                |
| Chile/Santiago, 42/2020        | EPI_SL_445321 | HOSPITAL FELIX BULNES                                                                                                                                    | Instituto de Salud Publica de Chile                                                                                                                                                                                                                           | 2020-03-17 | Andrés E Castillo et al                                                                                                                                                |
| Chile/Santiago, 45/2020        | EPI_SL_445324 | INTEGRAMEDICA S.A                                                                                                                                        | Instituto de Salud Publica de Chile                                                                                                                                                                                                                           | 2020-03-19 | Andrés E Castillo et al                                                                                                                                                |
| Chile/Santiago, 46/2020        | EPI_SL_445325 | HOSPITAL DR SOTERO DEL RIO                                                                                                                               | Instituto de Salud Publica de Chile                                                                                                                                                                                                                           | 2020-03-21 | Andrés E Castillo et al                                                                                                                                                |
| Chile/Santiago, 5/2020         | EPI_SL_445248 | CLINICA ALEMANA DE SANTIAGO S.A.                                                                                                                         | Instituto de Salud Publica de Chile                                                                                                                                                                                                                           | 2020-03-09 | Andrés E Castillo et al                                                                                                                                                |
| Chile/Santiago, 52/2020        | EPI_SL_445349 | HOSPITAL SAN JUAN DE DIOS                                                                                                                                | Instituto de Salud Publica de Chile                                                                                                                                                                                                                           | 2020-04-01 | Andrés E Castillo et al                                                                                                                                                |
| Chile/Santiago, 54/2020        | EPI_SL_445350 | HOSPITAL SAN JUAN DE DIOS                                                                                                                                | Instituto de Salud Publica de Chile                                                                                                                                                                                                                           | 2020-04-01 | Andrés E Castillo et al                                                                                                                                                |
| Chile/Santiago, 56/2020        | EPI_SL_445352 | HOSPITAL DEL PROFESOR                                                                                                                                    | Instituto de Salud Publica de Chile                                                                                                                                                                                                                           | 2020-04-01 | Andrés E Castillo et al                                                                                                                                                |
| Chile/Santiago, 57/2020        | EPI_SL_445353 | HOSPITAL PADRE HURTADO                                                                                                                                   | Instituto de Salud Publica de Chile                                                                                                                                                                                                                           | 2020-04-02 | Andrés E Castillo et al                                                                                                                                                |
| Chile/Santiago, 58/2020        | EPI_SL_445354 | HOSPITAL DE CARABINEROS                                                                                                                                  | Instituto de Salud Publica de Chile                                                                                                                                                                                                                           | 2020-04-02 | Andrés E Castillo et al                                                                                                                                                |
| Chile/Santiago, 59/2020        | EPI_SL_445355 | MUTUAL DE SEGURIDAD C.H.C.                                                                                                                               | Instituto de Salud Publica de Chile                                                                                                                                                                                                                           | 2020-03-22 | Andrés E Castillo et al                                                                                                                                                |
| Chile/Santiago, 69/2020        | EPI_SL_445365 | HOSPITAL DR SOTERO DEL RIO                                                                                                                               | Instituto de Salud Publica de Chile                                                                                                                                                                                                                           | 2020-03-20 | Andrés E Castillo et al                                                                                                                                                |
| Chile/Santiago, 70/2020        | EPI_SL_445366 | HOSPITAL DR SOTERO DEL RIO                                                                                                                               | Instituto de Salud Publica de Chile                                                                                                                                                                                                                           | 2020-03-21 | Andrés E Castillo et al                                                                                                                                                |
| Chile/Santiago, 73/2020        | EPI_SL_445369 | HOSPITAL DE CARABINEROS                                                                                                                                  | Instituto de Salud Publica de Chile                                                                                                                                                                                                                           | 2020-04-06 | Andrés E Castillo et al                                                                                                                                                |
| Chile/Santiago, 74/2020        | EPI_SL_445370 | HOSPITAL DE CARABINEROS                                                                                                                                  | Instituto de Salud Publica de Chile                                                                                                                                                                                                                           | 2020-04-05 | Andrés E Castillo et al                                                                                                                                                |
| Chile/Santiago, 76/2020        | EPI_SL_445373 | HOSPITAL SAN JUAN DE DIOS                                                                                                                                | Instituto de Salud Publica de Chile                                                                                                                                                                                                                           | 2020-04-03 | Andrés E Castillo et al                                                                                                                                                |
| Chile/Santiago, 77/2020        | EPI_SL_445374 | HOSPITAL SAN JUAN DE DIOS                                                                                                                                | Instituto de Salud Publica de Chile                                                                                                                                                                                                                           | 2020-04-04 | Andrés E Castillo et al                                                                                                                                                |
| Chile/Santiago, 78/2020        | EPI_SL_445375 | HOSPITAL SAN JUAN DE DIOS                                                                                                                                | Instituto de Salud Publica de Chile                                                                                                                                                                                                                           | 2020-04-04 | Andrés E Castillo et al                                                                                                                                                |
| Chile/Santiago, 79/2020        | EPI_SL_445376 | HOSPITAL SAN JUAN DE DIOS                                                                                                                                | Instituto de Salud Publica de Chile                                                                                                                                                                                                                           | 2020-04-04 | Andrés E Castillo et al                                                                                                                                                |
| Chile/Santiago, 8/2020         | EPI_SL_445251 | HOSPITAL DE CARABINEROS                                                                                                                                  | Instituto de Salud Publica de Chile                                                                                                                                                                                                                           | 2020-03-10 | Andrés E Castillo et al                                                                                                                                                |
| Chile/Santiago, 80/2020        | EPI_SL_445377 | HOSPITAL SAN JUAN DE DIOS                                                                                                                                | Instituto de Salud Publica de Chile                                                                                                                                                                                                                           | 2020-04-05 | Andrés E Castillo et al                                                                                                                                                |
| Chile/Santiago, 81/2020        | EPI_SL_445379 | IMLAB- HOSPITAL FACH                                                                                                                                     | Instituto de Salud Publica de Chile                                                                                                                                                                                                                           | 2020-04-06 | Andrés E Castillo et al                                                                                                                                                |
| Chile/Santiago_cp241/2020      | EPI_SL_415658 | Laboratory of Molecular Virology, Pontificia Universidad Católica de Chile                                                                               | MSHS Pathogen Surveillance Program                                                                                                                                                                                                                            | 2020-03-06 | Rafael A. Medina et al ( <a href="https://doi.org/10.1007/s40475-020-00205-2">https://doi.org/10.1007/s40475-020-00205-2</a> )                                         |
| Chile/Santiago-04917/2020      | EPI_SL_468749 | Facultad de Medicina UC                                                                                                                                  | Center for Mathematical Modeling and Center for Genome Regulation, Santiago, Chile                                                                                                                                                                            | 2020-04-29 | Gaete A et al                                                                                                                                                          |
| Chile/Santiago-05015/2020      | EPI_SL_468751 | Facultad de Medicina UC                                                                                                                                  | Center for Mathematical Modeling and Center for Genome Regulation, Santiago, Chile                                                                                                                                                                            | 2020-04-29 | Gaete A et al                                                                                                                                                          |
| Chile/Santiago-05207/2020      | EPI_SL_468748 | Facultad de Medicina UC                                                                                                                                  | Center for Mathematical Modeling and Center for Genome Regulation, Santiago, Chile                                                                                                                                                                            | 2020-04-30 | Gaete A et al                                                                                                                                                          |
| Chile/Santiago-05230/2020      | EPI_SL_468747 | Facultad de Medicina UC                                                                                                                                  | Center for Mathematical Modeling and Center for Genome Regulation, Santiago, Chile                                                                                                                                                                            | 2020-04-30 | Gaete A et al                                                                                                                                                          |
| Chile/Santiago-05426/2020      | EPI_SL_468750 | Facultad de Medicina UC                                                                                                                                  | Center for Mathematical Modeling and Center for Genome Regulation, Santiago, Chile                                                                                                                                                                            | 2020-04-30 | Gaete A et al                                                                                                                                                          |
| Chile/Santiago-1/2020          | EPI_SL_414579 | Clinica Alemana de Santiago, Chile                                                                                                                       | Instituto de Salud Publica de Chile                                                                                                                                                                                                                           | 2020-03-03 | Andrés E. Castillo et al ( <a href="https://doi.org/10.1002/mv.25797">https://doi.org/10.1002/mv.25797</a> )                                                           |
| Chile/Santiago-2/2020          | EPI_SL_414580 | Clinica Santa María, Santiago, Chile                                                                                                                     | Instituto de Salud Publica de Chile                                                                                                                                                                                                                           | 2020-03-05 | Andrés E. Castillo et al ( <a href="https://doi.org/10.1002/mv.25797">https://doi.org/10.1002/mv.25797</a> )                                                           |
| Chile/Taca-25343/2020          | EPI_SL_459863 | Center for Genome Regulation (CRG)                                                                                                                       | Center for Mathematical Modeling and Center for Genome Regulation, Santiago, Chile                                                                                                                                                                            | 2020-03-12 | Gaete A et al                                                                                                                                                          |
| Chile/Temuco, 11/2020          | EPI_SL_445345 | HOSPITAL DR HERNAN HENRIQUEZ ARAVENA                                                                                                                     | Instituto de Salud Publica de Chile                                                                                                                                                                                                                           | 2020-03-27 | Andrés E Castillo et al                                                                                                                                                |
| Chile/Temuco, 4/2020           | EPI_SL_445339 | HOSPITAL DR HERNAN HENRIQUEZ ARAVENA                                                                                                                     | Instituto de Salud Publica de Chile                                                                                                                                                                                                                           | 2020-03-25 | Andrés E Castillo et al                                                                                                                                                |
| Chile/Valparaiso, 3/2020       | EPI_SL_445286 | HOSPITAL HANGA ROA                                                                                                                                       | Instituto de Salud Publica de Chile                                                                                                                                                                                                                           | 2020-03-19 | Andrés E Castillo et al                                                                                                                                                |
| Chongqing/YC01/2020            | EPI_SL_408478 | Yongchuan District Center for Disease Control and Prevention                                                                                             | Chongqing Municipal Center for Disease Control and Prevention                                                                                                                                                                                                 | 2020-01-21 | Ye Sheng et al                                                                                                                                                         |
| Chongqing/ZX01/2020            | EPI_SL_408479 | Zhongxian Center for Disease Control and Prevention                                                                                                      | Chongqing Municipal Center for Disease Control and Prevention                                                                                                                                                                                                 | 2020-01-23 | Ye Sheng et al                                                                                                                                                         |
| Colombia/Bogota/7839/2020      | EPI_SL_418262 | Instituto Nacional de Salud                                                                                                                              | Instituto Nacional de Salud Universidad Cooperativa de Colombia                                                                                                                                                                                               | 2020-03-06 | Macelva Mercado-Reyes et al ( <a href="https://doi.org/10.1101/2020.06.02.20107078">https://doi.org/10.1101/2020.06.02.20107078</a> )                                  |
| Colombia/GUR-0072/2020         | EPI_SL_447734 | Grupo de Investigaciones Microbiológicas-UR (GIMUR), Departamento de Biología, Facultad de Ciencias Naturales, Universidad del Rosario, Bogotá, Colombia | Grupo de Investigaciones Microbiológicas-UR (GIMUR), Departamento de Biología, Facultad de Ciencias Naturales, Universidad del Rosario, Bogotá, Colombia Instituto Nacional de Salud, Bogotá, Colombia Icahn School of Medicine at Mount Sinai, New York, USA | 2020-03-26 | Juan David Ramirez et al ( <a href="https://www.medrxiv.org/content/10.1101/2020.06.11.20125799v1">https://www.medrxiv.org/content/10.1101/2020.06.11.20125799v1</a> ) |
| Colombia/GUR-0135/2020         | EPI_SL_447737 | Grupo de Investigaciones Microbiológicas-UR (GIMUR), Departamento de Biología, Facultad de Ciencias Naturales, Universidad del Rosario, Bogotá, Colombia | Grupo de Investigaciones Microbiológicas-UR (GIMUR), Departamento de Biología, Facultad de Ciencias Naturales, Universidad del Rosario, Bogotá, Colombia Instituto Nacional de Salud, Bogotá, Colombia Icahn School of Medicine at Mount Sinai, New York, USA | 2020-03-26 | Juan David Ramirez et al ( <a href="https://www.medrxiv.org/content/10.1101/2020.06.11.20125799v1">https://www.medrxiv.org/content/10.1101/2020.06.11.20125799v1</a> ) |
| Colombia/GUR-0207/2020         | EPI_SL_447739 | Grupo de Investigaciones Microbiológicas-UR (GIMUR), Departamento de Biología, Facultad de Ciencias Naturales, Universidad del Rosario, Bogotá, Colombia | Grupo de Investigaciones Microbiológicas-UR (GIMUR), Departamento de Biología, Facultad de Ciencias Naturales, Universidad del Rosario, Bogotá, Colombia Instituto Nacional de Salud, Bogotá, Colombia Icahn School of Medicine at Mount Sinai, New York, USA | 2020-03-27 | Juan David Ramirez et al ( <a href="https://www.medrxiv.org/content/10.1101/2020.06.11.20125799v1">https://www.medrxiv.org/content/10.1101/2020.06.11.20125799v1</a> ) |
| Colombia/GUR-0209/2020         | EPI_SL_447740 | Grupo de Investigaciones Microbiológicas-UR (GIMUR), Departamento de Biología, Facultad de Ciencias Naturales, Universidad del Rosario, Bogotá, Colombia | Grupo de Investigaciones Microbiológicas-UR (GIMUR), Departamento de Biología, Facultad de Ciencias Naturales, Universidad del Rosario, Bogotá, Colombia Instituto Nacional de Salud, Bogotá, Colombia Icahn School of Medicine at Mount Sinai, New York, USA | 2020-03-28 | Juan David Ramirez et al ( <a href="https://www.medrxiv.org/content/10.1101/2020.06.11.20125799v1">https://www.medrxiv.org/content/10.1101/2020.06.11.20125799v1</a> ) |
| Colombia/GUR-0212/2020         | EPI_SL_447742 | Grupo de Investigaciones Microbiológicas-UR (GIMUR), Departamento de Biología, Facultad de Ciencias Naturales, Universidad del Rosario, Bogotá, Colombia | Grupo de Investigaciones Microbiológicas-UR (GIMUR), Departamento de Biología, Facultad de Ciencias Naturales, Universidad del Rosario, Bogotá, Colombia Instituto Nacional de Salud, Bogotá, Colombia Icahn School of Medicine at Mount Sinai, New York, USA | 2020-03-28 | Juan David Ramirez et al ( <a href="https://www.medrxiv.org/content/10.1101/2020.06.11.20125799v1">https://www.medrxiv.org/content/10.1101/2020.06.11.20125799v1</a> ) |
| Colombia/GUR-0458/2020         | EPI_SL_447745 | Grupo de Investigaciones Microbiológicas-UR (GIMUR), Departamento de Biología, Facultad de Ciencias Naturales, Universidad del Rosario, Bogotá, Colombia | Grupo de Investigaciones Microbiológicas-UR (GIMUR), Departamento de Biología, Facultad de Ciencias Naturales, Universidad del Rosario, Bogotá, Colombia Instituto Nacional de Salud, Bogotá, Colombia Icahn School of Medicine at Mount Sinai, New York, USA | 2020-03-28 | Juan David Ramirez et al ( <a href="https://www.medrxiv.org/content/10.1101/2020.06.11.20125799v1">https://www.medrxiv.org/content/10.1101/2020.06.11.20125799v1</a> ) |
| Colombia/GUR-0459/2020         | EPI_SL_447746 | Grupo de Investigaciones Microbiológicas-UR (GIMUR), Departamento de Biología, Facultad de Ciencias Naturales, Universidad del Rosario, Bogotá, Colombia | Grupo de Investigaciones Microbiológicas-UR (GIMUR), Departamento de Biología, Facultad de Ciencias Naturales, Universidad del Rosario, Bogotá, Colombia Instituto Nacional de Salud, Bogotá, Colombia Icahn School of Medicine at Mount Sinai, New York, USA | 2020-03-28 | Juan David Ramirez et al ( <a href="https://www.medrxiv.org/content/10.1101/2020.06.11.20125799v1">https://www.medrxiv.org/content/10.1101/2020.06.11.20125799v1</a> ) |
| Colombia/GUR-0609/2020         | EPI_SL_447748 | Grupo de Investigaciones Microbiológicas-UR (GIMUR), Departamento de Biología, Facultad de Ciencias Naturales, Universidad del Rosario, Bogotá, Colombia | Grupo de Investigaciones Microbiológicas-UR (GIMUR), Departamento de Biología, Facultad de Ciencias Naturales, Universidad del Rosario, Bogotá, Colombia Instituto Nacional de Salud, Bogotá, Colombia Icahn School of Medicine at Mount Sinai, New York, USA | 2020-03-29 | Juan David Ramirez et al ( <a href="https://www.medrxiv.org/content/10.1101/2020.06.11.20125799v1">https://www.medrxiv.org/content/10.1101/2020.06.11.20125799v1</a> ) |
| Colombia/GUR-1215/2020         | EPI_SL_447754 | Grupo de Investigaciones Microbiológicas-UR (GIMUR), Departamento de Biología, Facultad de Ciencias Naturales, Universidad del Rosario, Bogotá, Colombia | Grupo de Investigaciones Microbiológicas-UR (GIMUR), Departamento de Biología, Facultad de Ciencias Naturales, Universidad del Rosario, Bogotá, Colombia Instituto Nacional de Salud, Bogotá, Colombia Icahn School of Medicine at Mount Sinai, New York, USA | 2020-03-31 | Juan David Ramirez et al ( <a href="https://www.medrxiv.org/content/10.1101/2020.06.11.20125799v1">https://www.medrxiv.org/content/10.1101/2020.06.11.20125799v1</a> ) |
| Colombia/GUV-92034/2020        | EPI_SL_447755 | Instituto Nacional de Salud, Bogotá, Colombia                                                                                                            | Grupo de Investigaciones Microbiológicas-UR (GIMUR), Departamento de Biología, Facultad de Ciencias Naturales, Universidad del Rosario, Bogotá, Colombia Instituto Nacional de Salud, Bogotá, Colombia Icahn School of Medicine at Mount Sinai, New York, USA | 2020-03-31 | Juan David Ramirez et al ( <a href="https://www.medrxiv.org/content/10.1101/2020.06.11.20125799v1">https://www.medrxiv.org/content/10.1101/2020.06.11.20125799v1</a> ) |
| Colombia/GUV-92042/2020        | EPI_SL_447756 | Instituto Nacional de Salud, Bogotá, Colombia                                                                                                            | Grupo de Investigaciones Microbiológicas-UR (GIMUR), Departamento de Biología, Facultad de Ciencias Naturales, Universidad del Rosario, Bogotá, Colombia Instituto Nacional de Salud, Bogotá, Colombia Icahn School of Medicine at Mount Sinai, New York, USA | 2020-03-31 | Juan David Ramirez et al ( <a href="https://www.medrxiv.org/content/10.1101/2020.06.11.20125799v1">https://www.medrxiv.org/content/10.1101/2020.06.11.20125799v1</a> ) |
| Colombia/GUV-92087/2020        | EPI_SL_447760 | Instituto Nacional de Salud, Bogotá, Colombia                                                                                                            | Grupo de Investigaciones Microbiológicas-UR (GIMUR), Departamento de Biología, Facultad de Ciencias Naturales, Universidad del Rosario, Bogotá, Colombia Instituto Nacional de Salud, Bogotá, Colombia Icahn School of Medicine at Mount Sinai, New York, USA | 2020-03-31 | Juan David Ramirez et al ( <a href="https://www.medrxiv.org/content/10.1101/2020.06.11.20125799v1">https://www.medrxiv.org/content/10.1101/2020.06.11.20125799v1</a> ) |
| Colombia/GUV-92146/2020        | EPI_SL_447761 | Instituto Nacional de Salud, Bogotá, Colombia                                                                                                            | Grupo de Investigaciones Microbiológicas-UR (GIMUR), Departamento de Biología, Facultad de Ciencias Naturales, Universidad del Rosario, Bogotá, Colombia Instituto Nacional de Salud, Bogotá, Colombia Icahn School of Medicine at Mount Sinai, New York, USA | 2020-03-31 | Juan David Ramirez et al ( <a href="https://www.medrxiv.org/content/10.1101/2020.06.11.20125799v1">https://www.medrxiv.org/content/10.1101/2020.06.11.20125799v1</a> ) |
| Colombia/GUV-92218/2020        | EPI_SL_447765 | Instituto Nacional de Salud, Bogotá, Colombia                                                                                                            | Grupo de Investigaciones Microbiológicas-UR (GIMUR), Departamento de Biología, Facultad de Ciencias Naturales, Universidad del Rosario, Bogotá, Colombia Instituto Nacional de Salud, Bogotá, Colombia Icahn School of Medicine at Mount Sinai, New York, USA | 2020-03-31 | Juan David Ramirez et al ( <a href="https://www.medrxiv.org/content/10.1101/2020.06.11.20125799v1">https://www.medrxiv.org/content/10.1101/2020.06.11.20125799v1</a> ) |









|                             |                |                                                                                                                                                                                   |            |                                                                                                                                                                                                                                                                                         |
|-----------------------------|----------------|-----------------------------------------------------------------------------------------------------------------------------------------------------------------------------------|------------|-----------------------------------------------------------------------------------------------------------------------------------------------------------------------------------------------------------------------------------------------------------------------------------------|
| Egypt/CUNCI-HGC021/2020     | EPI_ISL_468061 | Cancer Biology Department                                                                                                                                                         | 2020-05-02 | Zeki et al                                                                                                                                                                                                                                                                              |
| Egypt/CUNCI-HGC023/2020     | EPI_ISL_468057 | Research Centre (NRC), Egypt                                                                                                                                                      | 2020-05-02 | Zeki et al                                                                                                                                                                                                                                                                              |
| Egypt/NRC-01/2020           | EPI_ISL_430820 | Center of Scientific Excellence for Influenza Viruses, National Research Centre (NRC), Egypt                                                                                      | 2020-03-18 | Mohamed Ahmed Ali et al                                                                                                                                                                                                                                                                 |
| Egypt/NRC-02/2020           | EPI_ISL_430819 | Center of Scientific Excellence for Influenza Viruses, National Research Centre (NRC), Egypt                                                                                      | 2020-03-18 | Mohamed Ahmed Ali et al                                                                                                                                                                                                                                                                 |
| England/2009200704/2020     | EPI_ISL_464181 | Respiratory Virus Unit, Microbiology Services Colindale, Public Health England                                                                                                    | 2020-02-24 | PHE Covid Sequencing Team et al                                                                                                                                                                                                                                                         |
| England/2009200804/2020     | EPI_ISL_464182 | Respiratory Virus Unit, Microbiology Services Colindale, Public Health England                                                                                                    | 2020-02-24 | PHE Covid Sequencing Team et al                                                                                                                                                                                                                                                         |
| England/2009461404/2020     | EPI_ISL_464185 | Respiratory Virus Unit, Microbiology Services Colindale, Public Health England                                                                                                    | 2020-02-25 | PHE Covid Sequencing Team et al                                                                                                                                                                                                                                                         |
| England/200960511104/2020   | EPI_ISL_464188 | Respiratory Virus Unit, Microbiology Services Colindale, Public Health England                                                                                                    | 2020-02-26 | PHE Covid Sequencing Team et al                                                                                                                                                                                                                                                         |
| England/2009801704/2020     | EPI_ISL_464195 | Respiratory Virus Unit, Microbiology Services Colindale, Public Health England                                                                                                    | 2020-02-26 | PHE Covid Sequencing Team et al                                                                                                                                                                                                                                                         |
| England/200981396/2020      | EPI_ISL_414010 | Respiratory Virus Unit, Microbiology Services Colindale, Public Health England                                                                                                    | 2020-02-26 | Monica Galiano et al ( <a href="https://virological.org/preliminary-analysis-of-sars-cov-2-importation-establishment-of-uk-transmission-lineages/507">https://virological.org/preliminary-analysis-of-sars-cov-2-importation-establishment-of-uk-transmission-lineages/507</a> )        |
| England/2010000530/2020     | EPI_ISL_414523 | Respiratory Virus Unit, Microbiology Services Colindale, Public Health England                                                                                                    | 2020-02-27 | Monica Galiano et al ( <a href="https://virological.org/preliminary-analysis-of-sars-cov-2-importation-establishment-of-uk-transmission-lineages/507">https://virological.org/preliminary-analysis-of-sars-cov-2-importation-establishment-of-uk-transmission-lineages/507</a> )        |
| England/20100005406/2020    | EPI_ISL_415135 | Respiratory Virus Unit, Microbiology Services Colindale, Public Health England                                                                                                    | 2020-02-28 | PHE Covid Sequencing Team et al                                                                                                                                                                                                                                                         |
| England/2010012094/2020     | EPI_ISL_464259 | Respiratory Virus Unit, Microbiology Services Colindale, Public Health England                                                                                                    | 2020-02-28 | PHE Covid Sequencing Team et al                                                                                                                                                                                                                                                         |
| England/20100121007/2020    | EPI_ISL_415141 | Respiratory Virus Unit, Microbiology Services Colindale, Public Health England                                                                                                    | 2020-02-29 | Monica Galiano et al ( <a href="https://virological.org/preliminary-analysis-of-sars-cov-2-importation-establishment-of-uk-transmission-lineages/507">https://virological.org/preliminary-analysis-of-sars-cov-2-importation-establishment-of-uk-transmission-lineages/507</a> )        |
| England/20100140024/2020    | EPI_ISL_464304 | Respiratory Virus Unit, Microbiology Services Colindale, Public Health England                                                                                                    | 2020-02-29 | PHE Covid Sequencing Team et al                                                                                                                                                                                                                                                         |
| England/201004081/2020      | EPI_ISL_414525 | Respiratory Virus Unit, Microbiology Services Colindale, Public Health England                                                                                                    | 2020-03-02 | Monica Galiano et al ( <a href="https://virological.org/preliminary-analysis-of-sars-cov-2-importation-establishment-of-uk-transmission-lineages/507">https://virological.org/preliminary-analysis-of-sars-cov-2-importation-establishment-of-uk-transmission-lineages/507</a> )        |
| England/201080206/2020      | EPI_ISL_464431 | Respiratory Virus Unit, Microbiology Services Colindale, Public Health England                                                                                                    | 2020-03-06 | PHE Covid Sequencing Team et al                                                                                                                                                                                                                                                         |
| England/20108127304/2020    | EPI_ISL_464482 | Respiratory Virus Unit, Microbiology Services Colindale, Public Health England                                                                                                    | 2020-03-05 | PHE Covid Sequencing Team et al                                                                                                                                                                                                                                                         |
| England/201140058/2020      | EPI_ISL_464710 | Respiratory Virus Unit, Microbiology Services Colindale, Public Health England                                                                                                    | 2020-03-10 | PHE Covid Sequencing Team et al                                                                                                                                                                                                                                                         |
| England/201161201/2020      | EPI_ISL_464820 | Respiratory Virus Unit, Microbiology Services Colindale, Public Health England                                                                                                    | 2020-03-11 | PHE Covid Sequencing Team et al                                                                                                                                                                                                                                                         |
| England/201144075204/2020   | EPI_ISL_423567 | Respiratory Virus Unit, Microbiology Services Colindale, Public Health England                                                                                                    | 2020-04-01 | Monica Galiano et al ( <a href="https://virological.org/preliminary-analysis-of-sars-cov-2-importation-establishment-of-uk-transmission-lineages/507">https://virological.org/preliminary-analysis-of-sars-cov-2-importation-establishment-of-uk-transmission-lineages/507</a> )        |
| England/20166008804/2020    | EPI_ISL_465221 | Respiratory Virus Unit, Microbiology Services Colindale, Public Health England                                                                                                    | 2020-04-15 | PHE Covid Sequencing Team et al                                                                                                                                                                                                                                                         |
| England/20166064004/2020    | EPI_ISL_465653 | Respiratory Virus Unit, Microbiology Services Colindale, Public Health England                                                                                                    | 2020-04-16 | PHE Covid Sequencing Team et al                                                                                                                                                                                                                                                         |
| England/20172002604/2020    | EPI_ISL_465321 | Respiratory Virus Unit, Microbiology Services Colindale, Public Health England                                                                                                    | 2020-04-19 | PHE Covid Sequencing Team et al                                                                                                                                                                                                                                                         |
| England/20189176861/2020    | EPI_ISL_465575 | Respiratory Virus Unit, Microbiology Services Colindale, Public Health England                                                                                                    | 2020-05-01 | PHE Covid Sequencing Team et al                                                                                                                                                                                                                                                         |
| England/20204115804/2020    | EPI_ISL_465653 | Respiratory Virus Unit, Microbiology Services Colindale, Public Health England                                                                                                    | 2020-05-13 | Stephanie Hutchings et al A ( <a href="https://virological.org/preliminary-analysis-of-sars-cov-2-importation-establishment-of-uk-transmission-lineages/507">https://virological.org/preliminary-analysis-of-sars-cov-2-importation-establishment-of-uk-transmission-lineages/507</a> ) |
| England/BRIS-12ACFZ/2020    | EPI_ISL_443890 | PHE South West Regional Laboratory, National Infection Service                                                                                                                    | 2020-03-25 | Stephanie Hutchings et al A ( <a href="https://virological.org/preliminary-analysis-of-sars-cov-2-importation-establishment-of-uk-transmission-lineages/507">https://virological.org/preliminary-analysis-of-sars-cov-2-importation-establishment-of-uk-transmission-lineages/507</a> ) |
| England/BRIS-12ADHG/2020    | EPI_ISL_443977 | PHE South West Regional Laboratory, National Infection Service                                                                                                                    | 2020-03-26 | Stephanie Hutchings et al A ( <a href="https://virological.org/preliminary-analysis-of-sars-cov-2-importation-establishment-of-uk-transmission-lineages/507">https://virological.org/preliminary-analysis-of-sars-cov-2-importation-establishment-of-uk-transmission-lineages/507</a> ) |
| England/BRIS-12S101/2020    | EPI_ISL_443914 | PHE South West Regional Laboratory, National Infection Service                                                                                                                    | 2020-03-26 | Stephanie Hutchings et al A ( <a href="https://virological.org/preliminary-analysis-of-sars-cov-2-importation-establishment-of-uk-transmission-lineages/507">https://virological.org/preliminary-analysis-of-sars-cov-2-importation-establishment-of-uk-transmission-lineages/507</a> ) |
| England/BRIS-12C999/2020    | EPI_ISL_465901 | PHE South West Regional Laboratory, National Infection Service                                                                                                                    | 2020-05-14 | Stephanie Hutchings et al B                                                                                                                                                                                                                                                             |
| England/CAMB-1AFB7A/2020    | EPI_ISL_459194 | Department of Pathology, University of Cambridge                                                                                                                                  | 2020-05-02 | Luke W Meredith et al B                                                                                                                                                                                                                                                                 |
| England/CAMB-1B0217/2020    | EPI_ISL_459185 | Department of Pathology, University of Cambridge                                                                                                                                  | 2020-05-02 | Luke W Meredith et al B                                                                                                                                                                                                                                                                 |
| England/CAMB-1B0D34/2020    | EPI_ISL_452366 | Department of Pathology, University of Cambridge                                                                                                                                  | 2020-05-11 | Luke W Meredith et al A ( <a href="https://virological.org/preliminary-analysis-of-sars-cov-2-importation-establishment-of-uk-transmission-lineages/507">https://virological.org/preliminary-analysis-of-sars-cov-2-importation-establishment-of-uk-transmission-lineages/507</a> )     |
| England/CAMB-1B2582/2020    | EPI_ISL_456698 | Department of Pathology, University of Cambridge                                                                                                                                  | 2020-05-15 | Luke W Meredith et al A ( <a href="https://virological.org/preliminary-analysis-of-sars-cov-2-importation-establishment-of-uk-transmission-lineages/507">https://virological.org/preliminary-analysis-of-sars-cov-2-importation-establishment-of-uk-transmission-lineages/507</a> )     |
| England/CAMB-1B335D/2020    | EPI_ISL_461556 | Department of Pathology, University of Cambridge                                                                                                                                  | 2020-05-25 | Luke W Meredith et al B                                                                                                                                                                                                                                                                 |
| England/CAMB-7330F/2020     | EPI_ISL_440257 | Department of Pathology, University of Cambridge                                                                                                                                  | 2020-03-21 | Luke W Meredith et al A ( <a href="https://virological.org/preliminary-analysis-of-sars-cov-2-importation-establishment-of-uk-transmission-lineages/507">https://virological.org/preliminary-analysis-of-sars-cov-2-importation-establishment-of-uk-transmission-lineages/507</a> )     |
| England/CAMB-76FEA/2020     | EPI_ISL_425448 | Department of Pathology, University of Cambridge                                                                                                                                  | 2020-03-31 | Luke W Meredith et al C ( <a href="https://doi.org/10.1101/2020.05.08.20095687">https://doi.org/10.1101/2020.05.08.20095687</a> )                                                                                                                                                       |
| England/CAMB-776F3/2020     | EPI_ISL_438543 | Department of Pathology, University of Cambridge                                                                                                                                  | 2020-03-30 | Luke W Meredith et al A ( <a href="https://virological.org/preliminary-analysis-of-sars-cov-2-importation-establishment-of-uk-transmission-lineages/507">https://virological.org/preliminary-analysis-of-sars-cov-2-importation-establishment-of-uk-transmission-lineages/507</a> )     |
| England/CAMB-7A3JA/2020     | EPI_ISL_440609 | Department of Pathology, University of Cambridge                                                                                                                                  | 2020-04-03 | Luke W Meredith et al A ( <a href="https://virological.org/preliminary-analysis-of-sars-cov-2-importation-establishment-of-uk-transmission-lineages/507">https://virological.org/preliminary-analysis-of-sars-cov-2-importation-establishment-of-uk-transmission-lineages/507</a> )     |
| England/CAMB-7B009/2020     | EPI_ISL_442063 | Department of Pathology, University of Cambridge                                                                                                                                  | 2020-04-04 | Luke W Meredith et al A ( <a href="https://virological.org/preliminary-analysis-of-sars-cov-2-importation-establishment-of-uk-transmission-lineages/507">https://virological.org/preliminary-analysis-of-sars-cov-2-importation-establishment-of-uk-transmission-lineages/507</a> )     |
| England/CAMB-7C1AC/2020     | EPI_ISL_434005 | Department of Pathology, University of Cambridge                                                                                                                                  | 2020-04-05 | Luke W Meredith et al A ( <a href="https://virological.org/preliminary-analysis-of-sars-cov-2-importation-establishment-of-uk-transmission-lineages/507">https://virological.org/preliminary-analysis-of-sars-cov-2-importation-establishment-of-uk-transmission-lineages/507</a> )     |
| England/CAMB-7C4DE/2020     | EPI_ISL_442280 | Department of Pathology, University of Cambridge                                                                                                                                  | 2020-04-05 | Luke W Meredith et al A ( <a href="https://virological.org/preliminary-analysis-of-sars-cov-2-importation-establishment-of-uk-transmission-lineages/507">https://virological.org/preliminary-analysis-of-sars-cov-2-importation-establishment-of-uk-transmission-lineages/507</a> )     |
| England/CAMB-7D0FF/2020     | EPI_ISL_441605 | Department of Pathology, University of Cambridge                                                                                                                                  | 2020-04-06 | Luke W Meredith et al A ( <a href="https://virological.org/preliminary-analysis-of-sars-cov-2-importation-establishment-of-uk-transmission-lineages/507">https://virological.org/preliminary-analysis-of-sars-cov-2-importation-establishment-of-uk-transmission-lineages/507</a> )     |
| England/CAMB-7E1CE/2020     | EPI_ISL_434048 | Department of Pathology, University of Cambridge                                                                                                                                  | 2020-04-17 | Luke W Meredith et al C ( <a href="https://doi.org/10.1101/2020.05.08.20095687">https://doi.org/10.1101/2020.05.08.20095687</a> )                                                                                                                                                       |
| England/CAMB-7E0C8/2020     | EPI_ISL_442828 | Department of Pathology, University of Cambridge                                                                                                                                  | 2020-04-06 | Luke W Meredith et al A ( <a href="https://virological.org/preliminary-analysis-of-sars-cov-2-importation-establishment-of-uk-transmission-lineages/507">https://virological.org/preliminary-analysis-of-sars-cov-2-importation-establishment-of-uk-transmission-lineages/507</a> )     |
| England/CAMB-81BAC/2020     | EPI_ISL_442591 | Department of Pathology, University of Cambridge                                                                                                                                  | 2020-04-12 | Luke W Meredith et al A ( <a href="https://virological.org/preliminary-analysis-of-sars-cov-2-importation-establishment-of-uk-transmission-lineages/507">https://virological.org/preliminary-analysis-of-sars-cov-2-importation-establishment-of-uk-transmission-lineages/507</a> )     |
| England/CAMB-81C0AD/2020    | EPI_ISL_442551 | Department of Pathology, University of Cambridge                                                                                                                                  | 2020-04-12 | Luke W Meredith et al A ( <a href="https://virological.org/preliminary-analysis-of-sars-cov-2-importation-establishment-of-uk-transmission-lineages/507">https://virological.org/preliminary-analysis-of-sars-cov-2-importation-establishment-of-uk-transmission-lineages/507</a> )     |
| England/CAMB-83CFZ/2020     | EPI_ISL_436882 | Department of Pathology, University of Cambridge                                                                                                                                  | 2020-04-23 | Sam Haldenby et al ( <a href="https://virological.org/preliminary-analysis-of-sars-cov-2-importation-establishment-of-uk-transmission-lineages/507">https://virological.org/preliminary-analysis-of-sars-cov-2-importation-establishment-of-uk-transmission-lineages/507</a> )          |
| England/LIVE-98F3A/2020     | EPI_ISL_444940 | Liverpool Clinical Laboratories                                                                                                                                                   | 2020-03-26 | Sam Haldenby et al ( <a href="https://virological.org/preliminary-analysis-of-sars-cov-2-importation-establishment-of-uk-transmission-lineages/507">https://virological.org/preliminary-analysis-of-sars-cov-2-importation-establishment-of-uk-transmission-lineages/507</a> )          |
| England/LIVE-9D788/2020     | EPI_ISL_453232 | Liverpool Clinical Laboratories                                                                                                                                                   | 2020-04-15 | Sam Haldenby et al ( <a href="https://virological.org/preliminary-analysis-of-sars-cov-2-importation-establishment-of-uk-transmission-lineages/507">https://virological.org/preliminary-analysis-of-sars-cov-2-importation-establishment-of-uk-transmission-lineages/507</a> )          |
| England/LIVE-9EAD0/2020     | EPI_ISL_453334 | Liverpool Clinical Laboratories                                                                                                                                                   | 2020-04-05 | Sam Haldenby et al ( <a href="https://virological.org/preliminary-analysis-of-sars-cov-2-importation-establishment-of-uk-transmission-lineages/507">https://virological.org/preliminary-analysis-of-sars-cov-2-importation-establishment-of-uk-transmission-lineages/507</a> )          |
| England/LOND-D43C/2020      | EPI_ISL_448666 | University College London, Great Ormond Street Hospital for Children NHS Foundation Trust, Imperial College Healthcare NHS Trust                                                  | 2020-04-14 | Snag Castellano et al ( <a href="https://virological.org/preliminary-analysis-of-sars-cov-2-importation-establishment-of-uk-transmission-lineages/507">https://virological.org/preliminary-analysis-of-sars-cov-2-importation-establishment-of-uk-transmission-lineages/507</a> )       |
| England/NORC-28AC2A/2020    | EPI_ISL_469328 | NI-OMICNS DNA Sequencing research facility, Northumbria University                                                                                                                | 2020-05-18 | Chris Duncan et al                                                                                                                                                                                                                                                                      |
| England/NORW-ETD79/2020     | EPI_ISL_449091 | Quadram Institute Bioscience                                                                                                                                                      | 2020-05-06 | Dave J. Baker et al ( <a href="https://virological.org/preliminary-analysis-of-sars-cov-2-importation-establishment-of-uk-transmission-lineages/507">https://virological.org/preliminary-analysis-of-sars-cov-2-importation-establishment-of-uk-transmission-lineages/507</a> )         |
| England/NORW-EAB80/2020     | EPI_ISL_457359 | Quadram Institute Bioscience                                                                                                                                                      | 2020-05-11 | Dave J. Baker et al ( <a href="https://virological.org/preliminary-analysis-of-sars-cov-2-importation-establishment-of-uk-transmission-lineages/507">https://virological.org/preliminary-analysis-of-sars-cov-2-importation-establishment-of-uk-transmission-lineages/507</a> )         |
| England/NORW-EB2AB/2020     | EPI_ISL_457415 | Quadram Institute Bioscience                                                                                                                                                      | 2020-05-03 | Dave J. Baker et al ( <a href="https://virological.org/preliminary-analysis-of-sars-cov-2-importation-establishment-of-uk-transmission-lineages/507">https://virological.org/preliminary-analysis-of-sars-cov-2-importation-establishment-of-uk-transmission-lineages/507</a> )         |
| England/NORW-EB33F/2020     | EPI_ISL_457419 | Quadram Institute Bioscience                                                                                                                                                      | 2020-05-03 | Dave J. Baker et al ( <a href="https://virological.org/preliminary-analysis-of-sars-cov-2-importation-establishment-of-uk-transmission-lineages/507">https://virological.org/preliminary-analysis-of-sars-cov-2-importation-establishment-of-uk-transmission-lineages/507</a> )         |
| England/NORW-EB50C/2020     | EPI_ISL_457439 | Quadram Institute Bioscience                                                                                                                                                      | 2020-05-01 | Dave J. Baker et al ( <a href="https://virological.org/preliminary-analysis-of-sars-cov-2-importation-establishment-of-uk-transmission-lineages/507">https://virological.org/preliminary-analysis-of-sars-cov-2-importation-establishment-of-uk-transmission-lineages/507</a> )         |
| England/NOTT-110D23/2020    | EPI_ISL_448410 | Queens Medical Centre, Clinical Microbiology Department / DeepSeq Nottingham                                                                                                      | 2020-04-29 | Gemma Clark et al A ( <a href="https://virological.org/preliminary-analysis-of-sars-cov-2-importation-establishment-of-uk-transmission-lineages/507">https://virological.org/preliminary-analysis-of-sars-cov-2-importation-establishment-of-uk-transmission-lineages/507</a> )         |
| England/NOTT-11110D/2020    | EPI_ISL_453630 | Queens Medical Centre, Clinical Microbiology Department / DeepSeq Nottingham                                                                                                      | 2020-05-02 | Gemma Clark et al A ( <a href="https://virological.org/preliminary-analysis-of-sars-cov-2-importation-establishment-of-uk-transmission-lineages/507">https://virological.org/preliminary-analysis-of-sars-cov-2-importation-establishment-of-uk-transmission-lineages/507</a> )         |
| England/NOTT-111399/2020    | EPI_ISL_453654 | Queens Medical Centre, Clinical Microbiology Department / DeepSeq Nottingham                                                                                                      | 2020-05-13 | Gemma Clark et al A ( <a href="https://virological.org/preliminary-analysis-of-sars-cov-2-importation-establishment-of-uk-transmission-lineages/507">https://virological.org/preliminary-analysis-of-sars-cov-2-importation-establishment-of-uk-transmission-lineages/507</a> )         |
| England/NOTT-1116DC/2020    | EPI_ISL_461909 | Queens Medical Centre, Clinical Microbiology Department / DeepSeq Nottingham                                                                                                      | 2020-05-22 | Gemma Clark et al B                                                                                                                                                                                                                                                                     |
| England/NOTT-111AC1/2020    | EPI_ISL_461959 | Queens Medical Centre, Clinical Microbiology Department / DeepSeq Nottingham                                                                                                      | 2020-05-27 | Gemma Clark et al B                                                                                                                                                                                                                                                                     |
| England/NOTT-111B28/2020    | EPI_ISL_461962 | Queens Medical Centre, Clinical Microbiology Department / DeepSeq Nottingham                                                                                                      | 2020-06-01 | Gemma Clark et al B                                                                                                                                                                                                                                                                     |
| England/NOTT-111B37/2020    | EPI_ISL_461963 | Queens Medical Centre, Clinical Microbiology Department / DeepSeq Nottingham                                                                                                      | 2020-06-01 | Gemma Clark et al B                                                                                                                                                                                                                                                                     |
| England/NOTT-111B46/2020    | EPI_ISL_461964 | Queens Medical Centre, Clinical Microbiology Department / DeepSeq Nottingham                                                                                                      | 2020-06-01 | Gemma Clark et al B                                                                                                                                                                                                                                                                     |
| England/NOTT-111B47/2020    | EPI_ISL_461965 | Queens Medical Centre, Clinical Microbiology Department / DeepSeq Nottingham                                                                                                      | 2020-06-02 | Gemma Clark et al B                                                                                                                                                                                                                                                                     |
| England/NOTT-111B73/2020    | EPI_ISL_461968 | Queens Medical Centre, Clinical Microbiology Department / DeepSeq Nottingham                                                                                                      | 2020-06-02 | Gemma Clark et al B                                                                                                                                                                                                                                                                     |
| England/NOTT-111B82/2020    | EPI_ISL_461967 | Queens Medical Centre, Clinical Microbiology Department / DeepSeq Nottingham                                                                                                      | 2020-06-02 | Gemma Clark et al B                                                                                                                                                                                                                                                                     |
| England/NOTT-111BF8/2020    | EPI_ISL_461969 | Queens Medical Centre, Clinical Microbiology Department / DeepSeq Nottingham                                                                                                      | 2020-06-02 | Gemma Clark et al B                                                                                                                                                                                                                                                                     |
| England/OXON-AC398/2020     | EPI_ISL_448498 | Oxford Omics, NDM, University of Oxford; Oxford University Hospitals; Basinside and North Hampshire Hospital                                                                      | 2020-04-06 | Tanya Goluchina et al ( <a href="https://virological.org/preliminary-analysis-of-sars-cov-2-importation-establishment-of-uk-transmission-lineages/507">https://virological.org/preliminary-analysis-of-sars-cov-2-importation-establishment-of-uk-transmission-lineages/507</a> )       |
| England/OXON-ACB4/2020      | EPI_ISL_448510 | Oxford Omics, NDM, University of Oxford; Oxford University Hospitals; Basinside and North Hampshire Hospital                                                                      | 2020-04-06 | Tanya Goluchina et al ( <a href="https://virological.org/preliminary-analysis-of-sars-cov-2-importation-establishment-of-uk-transmission-lineages/507">https://virological.org/preliminary-analysis-of-sars-cov-2-importation-establishment-of-uk-transmission-lineages/507</a> )       |
| England/PORC-2D3CF6/2020    | EPI_ISL_461984 | Centre for Enzyme Innovation, University of Portsmouth / Translational Research Laboratory, Portsmouth Hospitals NHS Trust                                                        | 2020-05-05 | Angela Beckett et al                                                                                                                                                                                                                                                                    |
| England/PORC-2D7D13/2020    | EPI_ISL_461989 | Centre for Enzyme Innovation, University of Portsmouth / Translational Research Laboratory, Portsmouth Hospitals NHS Trust                                                        | 2020-05-08 | Angela Beckett et al                                                                                                                                                                                                                                                                    |
| England/SHEF-C67C5/2020     | EPI_ISL_432828 | Viology Department, Sheffield Teaching Hospitals NHS Foundation Trust / Viology Department, Sheffield Teaching Hospitals NHS Foundation Trust                                     | 2020-04-06 | Thushan de Silva et al ( <a href="https://virological.org/preliminary-analysis-of-sars-cov-2-importation-establishment-of-uk-transmission-lineages/507">https://virological.org/preliminary-analysis-of-sars-cov-2-importation-establishment-of-uk-transmission-lineages/507</a> )      |
| England/SHEF-C8BA6/2020     | EPI_ISL_442399 | Viology Department, Sheffield Teaching Hospitals NHS Foundation Trust / Department of Infection, Immunity and Cardiovascular Disease, The Medical School, University of Sheffield | 2020-03-24 | Thushan de Silva et al ( <a href="https://virological.org/preliminary-analysis-of-sars-cov-2-importation-establishment-of-uk-transmission-lineages/507">https://virological.org/preliminary-analysis-of-sars-cov-2-importation-establishment-of-uk-transmission-lineages/507</a> )      |
| England/SHEF-D0124/2020     | EPI_ISL_442466 | Viology Department, Sheffield Teaching Hospitals NHS Foundation Trust / Department of Infection, Immunity and Cardiovascular Disease, The Medical School, University of Sheffield | 2020-03-26 | Thushan de Silva et al ( <a href="https://virological.org/preliminary-analysis-of-sars-cov-2-importation-establishment-of-uk-transmission-lineages/507">https://virological.org/preliminary-analysis-of-sars-cov-2-importation-establishment-of-uk-transmission-lineages/507</a> )      |
| env/Beijing/WJDC-03-06/2020 | EPI_ISL_430743 | Chinese PLA Institute for Disease Control and Prevention National Institute for Viral Disease Control and Prevention, China CDC                                                   | 2020-03-14 | Peng Li et al                                                                                                                                                                                                                                                                           |
| env/US/FL-WF11/2020         | EPI_ISL_447900 | Lednicki Laboratory at Emerging Pathogens Institute                                                                                                                               | 2020-06-11 | Xiang Zhao et al                                                                                                                                                                                                                                                                        |
| Finland/1/2020              | EPI_ISL_407079 | Lapland Central Hospital                                                                                                                                                          | 2020-02-21 | Lednicki et al                                                                                                                                                                                                                                                                          |
| Finland/13M28/2020          | EPI_ISL_418386 | Department of Virology and Immunology, University of Helsinki and Helsinki University Hospital, HUSLAB Finland                                                                    | 2020-01-29 | Teemu Smura et al A                                                                                                                                                                                                                                                                     |
| Finland/13M27/2020          | EPI_ISL_418387 | Department of Virology and Immunology, University of Helsinki and Helsinki University Hospital, HUSLAB Finland                                                                    | 2020-01-29 | Teemu Smura et al A                                                                                                                                                                                                                                                                     |
| Finland/13M29/2020          | EPI_ISL_418388 | Department of Virology and Immunology, University of Helsinki and Helsinki University Hospital, HUSLAB Finland                                                                    | 2020-01-29 | Teemu Smura et al A                                                                                                                                                                                                                                                                     |
| Finland/13M29/2020          | EPI_ISL_418389 | Department of Virology and Immunology, University of Helsinki and Helsinki University Hospital, HUSLAB Finland                                                                    | 2020-01-29 | Teemu Smura et al A                                                                                                                                                                                                                                                                     |
| Finland/13M30/2020          | EPI_ISL_418390 | Department of Virology and Immunology, University of Helsinki and Helsinki University Hospital, HUSLAB Finland                                                                    | 2020-01-29 | Teemu Smura et al A                                                                                                                                                                                                                                                                     |
| Finland/13M31/2020          | EPI_ISL_418391 | Department of Virology and Immunology, University of Helsinki and Helsinki University Hospital, HUSLAB Finland                                                                    | 2020-01-29 | Teemu Smura et al A                                                                                                                                                                                                                                                                     |
| Finland/13M32/2020          | EPI_ISL_418392 | Department of Virology and Immunology, University of Helsinki and Helsinki University Hospital, HUSLAB Finland                                                                    | 2020-01-29 | Teemu Smura et al A                                                                                                                                                                                                                                                                     |
| Finland/13M34/2020          | EPI_ISL_418394 | Department of Virology and Immunology, University of Helsinki and Helsinki University Hospital, HUSLAB Finland                                                                    | 2020-01-29 | Teemu Smura et al A                                                                                                                                                                                                                                                                     |
| Finland/13M35/2020          | EPI_ISL_418395 | Department of Virology and Immunology, University of Helsinki and Helsinki University Hospital, HUSLAB Finland                                                                    | 2020-01-29 | Teemu Smura et al A                                                                                                                                                                                                                                                                     |
| Finland/13M36/2020          | EPI_ISL_418396 | Department of Virology and Immunology, University of Helsinki and Helsinki University Hospital, HUSLAB Finland                                                                    | 2020-01-29 | Teemu Smura et al A                                                                                                                                                                                                                                                                     |
| Finland/13M37/2020          | EPI_ISL_418397 | Department of Virology and Immunology, University of Helsinki and Helsinki University Hospital, HUSLAB Finland                                                                    | 2020-01-29 | Teemu Smura et al A                                                                                                                                                                                                                                                                     |
| Finland/13M38/2020          | EPI_ISL_418400 | Department of Virology and Immunology, University of Helsinki and Helsinki University Hospital, HUSLAB Finland                                                                    | 2020-01-29 | Teemu Smura et al A                                                                                                                                                                                                                                                                     |
| Finland/14M12/2020          | EPI_ISL_418401 | Department of Virology and Immunology, University of Helsinki and Helsinki University Hospital, HUSLAB Finland                                                                    | 2020-03-14 | Teemu Smura et al A                                                                                                                                                                                                                                                                     |
| Finland/14M14/2020          | EPI_ISL_418403 | Department of Virology and Immunology, University of Helsinki and Helsinki University Hospital, HUSLAB Finland                                                                    | 2020-03-14 | Teemu Smura et al A                                                                                                                                                                                                                                                                     |
| Finland/14M16/2020          | EPI_ISL_418404 | Department of Virology and Immunology, University of Helsinki and Helsinki University Hospital, HUSLAB Finland                                                                    | 2020-03-14 | Teemu Smura et al A                                                                                                                                                                                                                                                                     |
| Finland/14M26/2020          | EPI_ISL_418406 | Department of Virology and Immunology, University of Helsinki and Helsinki University Hospital, HUSLAB Finland                                                                    | 2020-03-14 | Teemu Smura et al A                                                                                                                                                                                                                                                                     |
| Finland/14M34/2020          | EPI_ISL_418407 | Department of Virology and Immunology, University of Helsinki and Helsinki University Hospital, HUSLAB Finland                                                                    | 2020-03-14 | Teemu Smura et al A                                                                                                                                                                                                                                                                     |
| Finland/14M42/2020          | EPI_ISL_418409 | Department of Virology and Immunology, University of Helsinki and Helsinki University Hospital, HUSLAB Finland                                                                    | 2020-03-14 | Teemu Smura et al A                                                                                                                                                                                                                                                                     |

|                          |               |                                                                                                                                                                                         |                                                                                                                                                                                         |            |                                                                                                                              |
|--------------------------|---------------|-----------------------------------------------------------------------------------------------------------------------------------------------------------------------------------------|-----------------------------------------------------------------------------------------------------------------------------------------------------------------------------------------|------------|------------------------------------------------------------------------------------------------------------------------------|
| Finland/4M77/2020        | EPI_SL_418410 | Department of Virology and Immunology, University of Helsinki and Helsinki University Hospital, HUSLAB Finland                                                                          | Department of Virology, Faculty of Medicine, University of Helsinki, Helsinki, Finland                                                                                                  | 2020-03-14 | Teemu Smura et al                                                                                                            |
| Finland/14M62/2020       | EPI_SL_418411 | Department of Virology and Immunology, University of Helsinki and Helsinki University Hospital, HUSLAB Finland                                                                          | Department of Virology, Faculty of Medicine, University of Helsinki, Helsinki, Finland                                                                                                  | 2020-03-14 | Teemu Smura et al                                                                                                            |
| Finland/FN-114/2020      | EPI_SL_414640 | Department of Virology and Immunology, University of Helsinki and Helsinki University Hospital, HUSLAB Finland                                                                          | Department of Virology, Faculty of Medicine, University of Helsinki, Helsinki, Finland                                                                                                  | 2020-03-01 | Teemu Smura et al                                                                                                            |
| Finland/FN-25/2020       | EPI_SL_412971 | HUS Diagnostikkakeskus, Hallinto                                                                                                                                                        | Department of Virology, Faculty of Medicine, University of Helsinki, Helsinki, Finland                                                                                                  | 2020-02-25 | Teemu Smura et al ( <a href="https://doi.org/10.1002/jmv.25773">https://doi.org/10.1002/jmv.25773</a> )                      |
| Finland/FN-268/2020      | EPI_SL_414646 | Department of Virology and Immunology, University of Helsinki and Helsinki University Hospital, HUSLAB Finland                                                                          | Department of Virology, Faculty of Medicine, University of Helsinki, Helsinki, Finland                                                                                                  | 2020-03-04 | Teemu Smura et al                                                                                                            |
| Finland/FN-455/2020      | EPI_SL_414642 | Department of Virology and Immunology, University of Helsinki and Helsinki University Hospital, HUSLAB Finland                                                                          | Department of Virology, Faculty of Medicine, University of Helsinki, Helsinki, Finland                                                                                                  | 2020-03-08 | Teemu Smura et al                                                                                                            |
| Finland/FN-508/2020      | EPI_SL_414643 | Department of Virology and Immunology, University of Helsinki and Helsinki University Hospital, HUSLAB Finland                                                                          | Department of Virology, Faculty of Medicine, University of Helsinki, Helsinki, Finland                                                                                                  | 2020-03-07 | Teemu Smura et al                                                                                                            |
| Finland/FN03032020A/2020 | EPI_SL_413602 | Department of Virology and Immunology, University of Helsinki and Helsinki University Hospital, HUSLAB Finland                                                                          | Department of Virology, Faculty of Medicine, University of Helsinki, Helsinki, Finland                                                                                                  | 2020-03-03 | Teemu Smura et al                                                                                                            |
| Finland/FN03032020C/2020 | EPI_SL_413604 | Department of Virology and Immunology, University of Helsinki and Helsinki University Hospital, HUSLAB Finland                                                                          | Department of Virology, Faculty of Medicine, University of Helsinki, Helsinki, Finland                                                                                                  | 2020-03-03 | Teemu Smura et al                                                                                                            |
| France/211_807/2020      | EPI_SL_465262 | Service de Virologie Hôpital Saint-Louis                                                                                                                                                | Laboratory of Cell Biology of viral infection, Unit INSERM U944                                                                                                                         | 2020-03-11 | Laurent Meleard et al                                                                                                        |
| France/ARA1222/2020      | EPI_SL_419179 | Institut des Agents Infectieux (IAI), Hospices Civils de Lyon                                                                                                                           | CNR Virus des Infections Respiratoires - France SUD                                                                                                                                     | 2020-03-22 | Antoin Bal et al                                                                                                             |
| France/ARA12270/2020     | EPI_SL_419188 | Centre Hospitalier de Macon                                                                                                                                                             | CNR Virus des Infections Respiratoires - France SUD                                                                                                                                     | 2020-03-22 | Antoin Bal et al                                                                                                             |
| France/B1623/2020        | EPI_SL_418219 | CHU - Hôpital Cavale Blanche - Labo. de Virologie                                                                                                                                       | Institut Pasteur, Paris                                                                                                                                                                 | 2020-02-26 | Mélanie Albert et al B ( <a href="https://doi.org/10.1101/2020.04.24.059576">https://doi.org/10.1101/2020.04.24.059576</a> ) |
| France/B2330/2020        | EPI_SL_416502 | CHRU Pontchailou - Laboratoire de Virologie                                                                                                                                             | National Reference Center for Viruses of Respiratory Infections, Institut Pasteur, Paris                                                                                                | 2020-02-26 | Mélanie Albert et al A ( <a href="https://doi.org/10.1101/2020.04.24.059576">https://doi.org/10.1101/2020.04.24.059576</a> ) |
| France/B2336/2020        | EPI_SL_416505 | CHRU Pontchailou - Laboratoire de Virologie                                                                                                                                             | National Reference Center for Viruses of Respiratory Infections, Institut Pasteur, Paris                                                                                                | 2020-03-02 | Mélanie Albert et al A ( <a href="https://doi.org/10.1101/2020.04.24.059576">https://doi.org/10.1101/2020.04.24.059576</a> ) |
| France/B2337/2020        | EPI_SL_416506 | CHRU Pontchailou - Laboratoire de Virologie                                                                                                                                             | National Reference Center for Viruses of Respiratory Infections, Institut Pasteur, Paris                                                                                                | 2020-03-03 | Mélanie Albert et al A ( <a href="https://doi.org/10.1101/2020.04.24.059576">https://doi.org/10.1101/2020.04.24.059576</a> ) |
| France/B234/2020         | EPI_SL_416509 | CHRU Pontchailou - Laboratoire de Virologie                                                                                                                                             | National Reference Center for Viruses of Respiratory Infections, Institut Pasteur, Paris                                                                                                | 2020-03-06 | Mélanie Albert et al A ( <a href="https://doi.org/10.1101/2020.04.24.059576">https://doi.org/10.1101/2020.04.24.059576</a> ) |
| France/B3102/2020        | EPI_SL_443265 | CHU - Hôpital Cavale Blanche - Labo. de Virologie                                                                                                                                       | National Reference Center for Viruses of Respiratory Infections, Institut Pasteur, Paris                                                                                                | 2020-04-03 | Mélanie Albert et al C                                                                                                       |
| France/B5363/2020        | EPI_SL_443273 | CHU - Hôpital Cavale Blanche - Labo. de Virologie                                                                                                                                       | National Reference Center for Viruses of Respiratory Infections, Institut Pasteur, Paris                                                                                                | 2020-03-24 | Mélanie Albert et al C                                                                                                       |
| France/B5434/2020        | EPI_SL_443279 | CHU - Hôpital Cavale Blanche - Labo. de Virologie                                                                                                                                       | National Reference Center for Viruses of Respiratory Infections, Institut Pasteur, Paris                                                                                                | 2020-04-01 | Mélanie Albert et al C                                                                                                       |
| France/B5447/2020        | EPI_SL_443280 | CHU - Hôpital Cavale Blanche - Labo. de Virologie                                                                                                                                       | National Reference Center for Viruses of Respiratory Infections, Institut Pasteur, Paris                                                                                                | 2020-04-01 | Mélanie Albert et al C                                                                                                       |
| France/B5456/2020        | EPI_SL_443281 | CHU - Hôpital Cavale Blanche - Labo. de Virologie                                                                                                                                       | National Reference Center for Viruses of Respiratory Infections, Institut Pasteur, Paris                                                                                                | 2020-04-03 | Mélanie Albert et al C                                                                                                       |
| France/B5685/2020        | EPI_SL_443291 | CHRU Pontchailou - Laboratoire de Virologie                                                                                                                                             | National Reference Center for Viruses of Respiratory Infections, Institut Pasteur, Paris                                                                                                | 2020-04-02 | Mélanie Albert et al C                                                                                                       |
| France/B5687/2020        | EPI_SL_443292 | CHRU Pontchailou - Laboratoire de Virologie                                                                                                                                             | National Reference Center for Viruses of Respiratory Infections, Institut Pasteur, Paris                                                                                                | 2020-04-03 | Mélanie Albert et al C                                                                                                       |
| France/B5688/2020        | EPI_SL_443293 | CHRU Pontchailou - Laboratoire de Virologie                                                                                                                                             | National Reference Center for Viruses of Respiratory Infections, Institut Pasteur, Paris                                                                                                | 2020-04-03 | Mélanie Albert et al C                                                                                                       |
| France/B5689/2020        | EPI_SL_443294 | CHRU Pontchailou - Laboratoire de Virologie                                                                                                                                             | National Reference Center for Viruses of Respiratory Infections, Institut Pasteur, Paris                                                                                                | 2020-04-06 | Mélanie Albert et al C                                                                                                       |
| France/BFC5011/2020      | EPI_SL_443261 | CHU de Dijon - Laboratoire de Virologie                                                                                                                                                 | National Reference Center for Viruses of Respiratory Infections, Institut Pasteur, Paris                                                                                                | 2020-04-03 | Mélanie Albert et al C                                                                                                       |
| France/BFC5012/2020      | EPI_SL_443262 | CHU de Dijon - Laboratoire de Virologie                                                                                                                                                 | National Reference Center for Viruses of Respiratory Infections, Institut Pasteur, Paris                                                                                                | 2020-04-02 | Mélanie Albert et al C                                                                                                       |
| France/BFC5017/2020      | EPI_SL_443263 | CHU de Dijon - Laboratoire de Virologie                                                                                                                                                 | National Reference Center for Viruses of Respiratory Infections, Institut Pasteur, Paris                                                                                                | 2020-04-02 | Mélanie Albert et al C                                                                                                       |
| France/BFC5019/2020      | EPI_SL_443264 | CHU de Dijon - Laboratoire de Virologie                                                                                                                                                 | National Reference Center for Viruses of Respiratory Infections, Institut Pasteur, Paris                                                                                                | 2020-04-02 | Mélanie Albert et al C                                                                                                       |
| France/BFC605/2020       | EPI_SL_443307 | La Villa Papiri                                                                                                                                                                         | National Reference Center for Viruses of Respiratory Infections, Institut Pasteur, Paris                                                                                                | 2020-04-09 | Mélanie Albert et al C                                                                                                       |
| France/CIBU-200634/2020  | EPI_SL_430848 | General Intensive Care Unit, Raymond Poincaré Hospital (AP-HP), Lab Inflammation & Infection, U1173 University Paris Saclay-UVSQ/INSERM, Garches, France.                               | Institut Pasteur, Laboratory for Urgent Response to biological Threats                                                                                                                  | 2020-04-01 | Annane Djilali et al                                                                                                         |
| France/CIBU2010/2020     | EPI_SL_437689 | Laboratory for Urgent Response to Biological Threats                                                                                                                                    | Institut Pasteur CIBU / ERI                                                                                                                                                             | 2020-02-27 | V. Caro et al                                                                                                                |
| France/CIBU200132/2020   | EPI_SL_437690 | Laboratory for Urgent Response to Biological Threats                                                                                                                                    | Institut Pasteur CIBU (ERI)                                                                                                                                                             | 2020-02-29 | V. Caro et al                                                                                                                |
| France/GE1583/2020       | EPI_SL_414623 | Laboratoire de Virologie Institut de Virologie - INSERM U 1109 Hôpitaux Universitaires de Strasbourg                                                                                    | National Reference Center for Viruses of Respiratory Infections, Institut Pasteur, Paris                                                                                                | 2020-02-25 | Mélanie Albert et al B                                                                                                       |
| France/GE1973/2020       | EPI_SL_414631 | Hôpital Robert Debré Laboratoire de Virologie                                                                                                                                           | National Reference Center for Viruses of Respiratory Infections, Institut Pasteur, Paris                                                                                                | 2020-03-04 | Mélanie Albert et al A ( <a href="https://doi.org/10.1101/2020.04.24.059576">https://doi.org/10.1101/2020.04.24.059576</a> ) |
| France/GE2720/2020       | EPI_SL_420399 | L'Air du Temps                                                                                                                                                                          | National Reference Center for Viruses of Respiratory Infections, Institut Pasteur, Paris                                                                                                | 2020-03-12 | Mélanie Albert et al B ( <a href="https://doi.org/10.1101/2020.04.24.059576">https://doi.org/10.1101/2020.04.24.059576</a> ) |
| France/GE6058/2020       | EPI_SL_443308 | Plaisance                                                                                                                                                                               | National Reference Center for Viruses of Respiratory Infections, Institut Pasteur, Paris                                                                                                | 2020-04-15 | Mélanie Albert et al C                                                                                                       |
| France/HF1463/2020       | EPI_SL_429968 | Centre Hospitalier Compègne Laboratoire de Biologie                                                                                                                                     | National Reference Center for Viruses of Respiratory Infections, Institut Pasteur, Paris                                                                                                | 2020-02-21 | Mélanie Albert et al B ( <a href="https://doi.org/10.1101/2020.04.24.059576">https://doi.org/10.1101/2020.04.24.059576</a> ) |
| France/HF1465/2020       | EPI_SL_418218 | Centre Hospitalier Compègne Laboratoire de Biologie                                                                                                                                     | National Reference Center for Viruses of Respiratory Infections, Institut Pasteur, Paris                                                                                                | 2020-02-21 | Mélanie Albert et al C                                                                                                       |
| France/HF1645/2020       | EPI_SL_418220 | Centre Hospitalier Compègne Laboratoire de Biologie                                                                                                                                     | National Reference Center for Viruses of Respiratory Infections, Institut Pasteur, Paris                                                                                                | 2020-02-28 | Mélanie Albert et al B ( <a href="https://doi.org/10.1101/2020.04.24.059576">https://doi.org/10.1101/2020.04.24.059576</a> ) |
| France/HF1684/2020       | EPI_SL_414626 | Centre Hospitalier Compègne Laboratoire de Biologie                                                                                                                                     | National Reference Center for Viruses of Respiratory Infections, Institut Pasteur, Paris                                                                                                | 2020-02-29 | Mélanie Albert et al B ( <a href="https://doi.org/10.1101/2020.04.24.059576">https://doi.org/10.1101/2020.04.24.059576</a> ) |
| France/HF1871/2020       | EPI_SL_414630 | Centre Hospitalier Compègne Laboratoire de Biologie                                                                                                                                     | National Reference Center for Viruses of Respiratory Infections, Institut Pasteur, Paris                                                                                                | 2020-03-03 | Mélanie Albert et al A ( <a href="https://doi.org/10.1101/2020.04.24.059576">https://doi.org/10.1101/2020.04.24.059576</a> ) |
| France/HF2039/2020       | EPI_SL_415649 |                                                                                                                                                                                         | National Reference Center for Viruses of Respiratory Infections, Institut Pasteur, Paris                                                                                                | 2020-03-05 | Mélanie Albert et al A ( <a href="https://doi.org/10.1101/2020.04.24.059576">https://doi.org/10.1101/2020.04.24.059576</a> ) |
| France/HF2196/2020       | EPI_SL_416493 | CH Jean de Navarre Laboratoire de Biologie                                                                                                                                              | National Reference Center for Viruses of Respiratory Infections, Institut Pasteur, Paris                                                                                                | 2020-03-08 | Mélanie Albert et al A ( <a href="https://doi.org/10.1101/2020.04.24.059576">https://doi.org/10.1101/2020.04.24.059576</a> ) |
| France/HF2361/2020       | EPI_SL_418226 | EHPAD - Résidences les Cèdres                                                                                                                                                           | National Reference Center for Viruses of Respiratory Infections, Institut Pasteur, Paris                                                                                                | 2020-03-09 | Mélanie Albert et al B ( <a href="https://doi.org/10.1101/2020.04.24.059576">https://doi.org/10.1101/2020.04.24.059576</a> ) |
| France/HF3036/2020       | EPI_SL_420053 | CH Jean de Navarre Laboratoire de Biologie                                                                                                                                              | National Reference Center for Viruses of Respiratory Infections, Institut Pasteur, Paris                                                                                                | 2020-03-19 | Mélanie Albert et al B ( <a href="https://doi.org/10.1101/2020.04.24.059576">https://doi.org/10.1101/2020.04.24.059576</a> ) |
| France/HF3141/2020       | EPI_SL_420057 | CH Compiegne Laboratoire de Biologie                                                                                                                                                    | National Reference Center for Viruses of Respiratory Infections, Institut Pasteur, Paris                                                                                                | 2020-03-22 | Mélanie Albert et al B ( <a href="https://doi.org/10.1101/2020.04.24.059576">https://doi.org/10.1101/2020.04.24.059576</a> ) |
| France/HF3534/2020       | EPI_SL_428353 | CH Compiegne Laboratoire de Biologie                                                                                                                                                    | National Reference Center for Viruses of Respiratory Infections, Institut Pasteur, Paris                                                                                                | 2020-03-24 | Mélanie Albert et al C                                                                                                       |
| France/HF3598/2020       | EPI_SL_428358 | CH Jeanne de Navarre Laboratoire de Biologie                                                                                                                                            | National Reference Center for Viruses of Respiratory Infections, Institut Pasteur, Paris                                                                                                | 2020-03-24 | Mélanie Albert et al C                                                                                                       |
| France/HF3677/2020       | EPI_SL_428359 | CH Compiegne Laboratoire de Biologie                                                                                                                                                    | National Reference Center for Viruses of Respiratory Infections, Institut Pasteur, Paris                                                                                                | 2020-03-23 | Mélanie Albert et al C                                                                                                       |
| France/HF4220/2020       | EPI_SL_428366 | CH Jeanne de Navarre Laboratoire de Biologie                                                                                                                                            | National Reference Center for Viruses of Respiratory Infections, Institut Pasteur, Paris                                                                                                | 2020-03-30 | Mélanie Albert et al C                                                                                                       |
| France/IDF0615/2020      | EPI_SL_408430 | Department of Infectious and Tropical Diseases, Bichat Claude Bernard Hospital, Paris                                                                                                   | National Reference Center for Viruses of Respiratory Infections, Institut Pasteur, Paris                                                                                                | 2020-01-29 | Mélanie Albert et al B ( <a href="https://doi.org/10.1101/2020.04.24.059576">https://doi.org/10.1101/2020.04.24.059576</a> ) |
| France/IDF0626/2020      | EPI_SL_408431 | Unité de Diagnostic, Inseam et Assistance Publique-Hôpitaux de Paris (Pitié Salpêtrière)                                                                                                | National Reference Center for Viruses of Respiratory Infections, Institut Pasteur, Paris                                                                                                | 2020-01-29 | Mélanie Albert et al B ( <a href="https://doi.org/10.1101/2020.04.24.059576">https://doi.org/10.1101/2020.04.24.059576</a> ) |
| France/IDF2251/2020      | EPI_SL_428355 | Institut Médico Légal- Hop R. Poincaré                                                                                                                                                  | National Reference Center for Viruses of Respiratory Infections, Institut Pasteur, Paris                                                                                                | 2020-03-11 | Mélanie Albert et al C                                                                                                       |
| France/IDF2253/2020      | EPI_SL_428357 | Institut Médico légal- Hop R. Poincaré                                                                                                                                                  | National Reference Center for Viruses of Respiratory Infections, Institut Pasteur, Paris                                                                                                | 2020-03-11 | Mélanie Albert et al C                                                                                                       |
| France/IDF278/2020       | EPI_SL_416499 | LBM GH nord Essonne                                                                                                                                                                     | National Reference Center for Viruses of Respiratory Infections, Institut Pasteur, Paris                                                                                                | 2020-03-11 | Mélanie Albert et al A ( <a href="https://doi.org/10.1101/2020.04.24.059576">https://doi.org/10.1101/2020.04.24.059576</a> ) |
| France/IDF2532/2020      | EPI_SL_418232 | Service des Urgences                                                                                                                                                                    | National Reference Center for Viruses of Respiratory Infections, Institut Pasteur, Paris                                                                                                | 2020-03-15 | Mélanie Albert et al B ( <a href="https://doi.org/10.1101/2020.04.24.059576">https://doi.org/10.1101/2020.04.24.059576</a> ) |
| France/IDF3018/2020      | EPI_SL_420062 | Service de Biologie Médicale - BP 125                                                                                                                                                   | National Reference Center for Viruses of Respiratory Infections, Institut Pasteur, Paris                                                                                                | 2020-03-22 | Mélanie Albert et al B ( <a href="https://doi.org/10.1101/2020.04.24.059576">https://doi.org/10.1101/2020.04.24.059576</a> ) |
| France/IDF309/2020       | EPI_SL_428351 | GH Nord Essonne Service de Biologie clinique                                                                                                                                            | National Reference Center for Viruses of Respiratory Infections, Institut Pasteur, Paris                                                                                                | 2020-03-24 | Mélanie Albert et al C                                                                                                       |
| France/IDF3703/2020      | EPI_SL_428361 | LBM GH nord Essonne de Longjumeau - BP 125                                                                                                                                              | National Reference Center for Viruses of Respiratory Infections, Institut Pasteur, Paris                                                                                                | 2020-03-25 | Mélanie Albert et al C                                                                                                       |
| France/IDF432/2020       | EPI_SL_443317 | Cabinet Médical                                                                                                                                                                         | National Reference Center for Viruses of Respiratory Infections, Institut Pasteur, Paris                                                                                                | 2020-03-23 | Mélanie Albert et al C                                                                                                       |
| France/IDF4793/2020      | EPI_SL_443259 | Résidence Omano                                                                                                                                                                         | National Reference Center for Viruses of Respiratory Infections, Institut Pasteur, Paris                                                                                                | 2020-04-02 | Mélanie Albert et al C                                                                                                       |
| France/IDF4843/2020      | EPI_SL_443260 | LBM GH nord Essonne de Longjumeau - BP 125                                                                                                                                              | National Reference Center for Viruses of Respiratory Infections, Institut Pasteur, Paris                                                                                                | 2020-04-02 | Mélanie Albert et al C                                                                                                       |
| France/IDF5655/2020      | EPI_SL_443285 | Laboratoire de Microbiologie - Bât A - CH René Dubois                                                                                                                                   | National Reference Center for Viruses of Respiratory Infections, Institut Pasteur, Paris                                                                                                | 2020-04-02 | Mélanie Albert et al C                                                                                                       |
| France/IDF578/2020       | EPI_SL_443304 | Résidence Esterel                                                                                                                                                                       | National Reference Center for Viruses of Respiratory Infections, Institut Pasteur, Paris                                                                                                | 2020-04-01 | Mélanie Albert et al C                                                                                                       |
| France/IDF5986/2020      | EPI_SL_443305 | LBM GH nord Essonne de Longjumeau - BP 125                                                                                                                                              | National Reference Center for Viruses of Respiratory Infections, Institut Pasteur, Paris                                                                                                | 2020-04-13 | Mélanie Albert et al C                                                                                                       |
| France/IDF6037/2020      | EPI_SL_443306 | Cabinet Médical                                                                                                                                                                         | National Reference Center for Viruses of Respiratory Infections, Institut Pasteur, Paris                                                                                                | 2020-04-02 | Mélanie Albert et al C                                                                                                       |
| France/IDF6073/2020      | EPI_SL_443314 | LBM GH nord Essonne de Longjumeau - BP 125                                                                                                                                              | National Reference Center for Viruses of Respiratory Infections, Institut Pasteur, Paris                                                                                                | 2020-04-14 | Mélanie Albert et al C                                                                                                       |
| France/Lyon_0668/2020    | EPI_SL_417336 | Institut des Agents Infectieux (IAI), Hospices Civils de Lyon                                                                                                                           | CNR Virus des Infections Respiratoires - France SUD                                                                                                                                     | 2020-03-06 | Antoin Bal et al                                                                                                             |
| France/N1620/2020        | EPI_SL_414624 | Centre Hospitalier Universitaire de Rouen Laboratoire de Virologie                                                                                                                      | National Reference Center for Viruses of Respiratory Infections, Institut Pasteur, Paris                                                                                                | 2020-02-26 | Mélanie Albert et al A ( <a href="https://doi.org/10.1101/2020.04.24.059576">https://doi.org/10.1101/2020.04.24.059576</a> ) |
| France/N2223/2020        | EPI_SL_416494 | Centre Hospitalier Universitaire de Rouen Laboratoire de Virologie                                                                                                                      | National Reference Center for Viruses of Respiratory Infections, Institut Pasteur, Paris                                                                                                | 2020-03-04 | Mélanie Albert et al A ( <a href="https://doi.org/10.1101/2020.04.24.059576">https://doi.org/10.1101/2020.04.24.059576</a> ) |
| France/OCC-13/2020       | EPI_SL_434628 | CHU Purpan - Laboratoire de Virologie - Institut Fédératif de Biologie                                                                                                                  | Laboratoire de virologie - Ecole Nationale Vétérinaire de Toulouse                                                                                                                      | 2020-04-07 | Guillaume Croville et al                                                                                                     |
| France/OCC-14/2020       | EPI_SL_434629 | CHU Purpan - Laboratoire de Virologie - Institut Fédératif de Biologie                                                                                                                  | Laboratoire de virologie - Ecole Nationale Vétérinaire de Toulouse                                                                                                                      | 2020-04-07 | Guillaume Croville et al                                                                                                     |
| France/OCC-15/2020       | EPI_SL_434630 | CHU Purpan - Laboratoire de Virologie - Institut Fédératif de Biologie                                                                                                                  | Laboratoire de virologie - Ecole Nationale Vétérinaire de Toulouse                                                                                                                      | 2020-04-08 | Guillaume Croville et al                                                                                                     |
| France/OCC-16/2020       | EPI_SL_434631 | CHU Purpan - Laboratoire de Virologie - Institut Fédératif de Biologie                                                                                                                  | Laboratoire de virologie - Ecole Nationale Vétérinaire de Toulouse                                                                                                                      | 2020-04-08 | Guillaume Croville et al                                                                                                     |
| France/OCC-17/2020       | EPI_SL_434632 | CHU Purpan - Laboratoire de Virologie - Institut Fédératif de Biologie                                                                                                                  | Laboratoire de virologie - Ecole Nationale Vétérinaire de Toulouse                                                                                                                      | 2020-04-09 | Guillaume Croville et al                                                                                                     |
| France/OCC-18/2020       | EPI_SL_434633 | CHU Purpan - Laboratoire de Virologie - Institut Fédératif de Biologie                                                                                                                  | Laboratoire de virologie - Ecole Nationale Vétérinaire de Toulouse                                                                                                                      | 2020-04-09 | Guillaume Croville et al                                                                                                     |
| France/OCC-19/2020       | EPI_SL_434634 | CHU Purpan - Laboratoire de Virologie - Institut Fédératif de Biologie                                                                                                                  | Laboratoire de virologie - Ecole Nationale Vétérinaire de Toulouse                                                                                                                      | 2020-04-11 | Guillaume Croville et al                                                                                                     |
| France/OCC-20/2020       | EPI_SL_434635 | CHU Purpan - Laboratoire de Virologie - Institut Fédératif de Biologie                                                                                                                  | Laboratoire de virologie - Ecole Nationale Vétérinaire de Toulouse                                                                                                                      | 2020-04-11 | Guillaume Croville et al                                                                                                     |
| France/PL1643/2020       | EPI_SL_414625 | Centre Hospitalier Régional Universitaire de Nantes Laboratoire de Virologie                                                                                                            | National Reference Center for Viruses of Respiratory Infections, Institut Pasteur, Paris                                                                                                | 2020-02-26 | Mélanie Albert et al A ( <a href="https://doi.org/10.1101/2020.04.24.059576">https://doi.org/10.1101/2020.04.24.059576</a> ) |
| France/RA739/2020        | EPI_SL_410486 | CNR Virus des Infections Respiratoires - France SUD                                                                                                                                     | CNR Virus des Infections Respiratoires - France SUD                                                                                                                                     | 2020-02-08 | Bal et al ( <a href="https://doi.org/10.1016/j.cmi.2020.02.020">https://doi.org/10.1016/j.cmi.2020.02.020</a> )              |
| Fujian/IMS200017/2020    | EPI_SL_431118 | Fujian Center for Disease Control and Prevention                                                                                                                                        | Fujian Center for Disease Control and Prevention                                                                                                                                        | 2020-03-13 | Lin Qi et al                                                                                                                 |
| Fujian/IMS200107/2020    | EPI_SL_431780 | Fujian Center for Disease Control and Prevention                                                                                                                                        | Fujian Center for Disease Control and Prevention                                                                                                                                        | 2020-03-17 | Lin Qi et al                                                                                                                 |
| Fujian/IMS200137/2020    | EPI_SL_431781 | Fujian Center for Disease Control and Prevention                                                                                                                                        | Fujian Center for Disease Control and Prevention                                                                                                                                        | 2020-03-19 | Lin Qi et al                                                                                                                 |
| Fuzhou/XJ2012/2020       | EPI_SL_456462 | Jiangxi Province Center for Disease Control and Prevention                                                                                                                              | Jiangxi Province Center for Disease Control and Prevention                                                                                                                              | 2020-02-05 | JianXiong Lu et al                                                                                                           |
| Gambia/GC19-015/2020     | EPI_SL_428865 | MRCG at LSHTM Genomics lab                                                                                                                                                              | MRCG at LSHTM Genomics lab                                                                                                                                                              | 2020-03-17 | Sesay et al et al ( <a href="https://doi.org/10.1101/2020.04.30.070771">https://doi.org/10.1101/2020.04.30.070771</a> )      |
| Gambia/GC19-026/2020     | EPI_SL_428866 | MRCG at LSHTM Genomics Lab                                                                                                                                                              | MRCG at LSHTM Genomics Lab                                                                                                                                                              | 2020-03-21 | Sesay et al et al ( <a href="https://doi.org/10.1101/2020.04.30.070771">https://doi.org/10.1101/2020.04.30.070771</a> )      |
| Gambia/GC19-029/2020     | EPI_SL_428867 | MRCG at LSHTM Genomics lab                                                                                                                                                              | MRCG at LSHTM Genomics lab                                                                                                                                                              | 2020-04-20 | Sesay et al et al ( <a href="https://doi.org/10.1101/2020.04.30.070771">https://doi.org/10.1101/2020.04.30.070771</a> )      |
| Georgia/Tb-1352/2020     | EPI_SL_420140 | Department for Virology, Molecular Biology and Genome Research, R. G. Luger Center for Public Health Research, National Center for Disease Control and Public Health (NCDC) of Georgia. | Department for Virology, Molecular Biology and Genome Research, R. G. Luger Center for Public Health Research, National Center for Disease Control and Public Health (NCDC) of Georgia. | 2020-03-28 | Nato Kotaria et al                                                                                                           |
| Georgia/Tb-1523/2020     | EPI_SL_420142 | Department for Virology, Molecular Biology and Genome Research, R. G. Luger Center for Public Health Research, National Center for Disease Control and Public Health (NCDC) of Georgia. | Department for Virology, Molecular Biology and Genome Research, R. G. Luger Center for Public Health Research, National Center for Disease Control and Public Health (NCDC) of Georgia. | 2020-03-30 | Marine Murtskhvaladze et al                                                                                                  |
| Georgia/Tb-1679/2020     | EPI_SL_420144 | Department for Virology, Molecular Biology and Genome Research, R. G. Luger Center for Public Health Research, National Center for Disease Control and Public Health (NCDC) of Georgia. | Department for Virology, Molecular Biology and Genome Research, R. G. Luger Center for Public Health Research, National Center for Disease Control and Public Health (NCDC) of Georgia. | 2020-04-01 | Gvantsa Chanturia et al                                                                                                      |
| Georgia/Tb-2208/2020     | EPI_SL_470876 | Department for Virology, Molecular Biology and Genome Research, R. G. Luger Center for Public Health Research, National Center for Disease Control and Public Health (NCDC) of Georgia. | Department for Virology, Molecular Biology and Genome Research, R. G. Luger Center for Public Health Research, National Center for Disease Control and Public                           |            |                                                                                                                              |







|                               |               |                                                                                                                                                                                                                               |            |                                                                                                                                             |
|-------------------------------|---------------|-------------------------------------------------------------------------------------------------------------------------------------------------------------------------------------------------------------------------------|------------|---------------------------------------------------------------------------------------------------------------------------------------------|
| GuangdongGD2020134-10031/2020 | EPI_SL_413883 | Guangdong Provincial Institution of Public Health, Guangdong Provincial Center for Disease Control and Prevention                                                                                                             | 2020-02-02 | Jing Lu et al ( <a href="https://dx.doi.org/10.1016/j.cell.2020.04.023">https://dx.doi.org/10.1016/j.cell.2020.04.023</a> )                 |
| GuangdongSY5U-1H1/2020        | EPI_SL_444969 | Guangzhou Eighth People's Hospital (Jiaye Sector)                                                                                                                                                                             | 2020-04-16 | Jiuncong Zhang et al                                                                                                                        |
| GuangdongSZ-N99-P0049/2020    | EPI_SL_413872 | Guangdong Provincial Institution of Public Health, Guangdong Provincial Center for Disease Control and Prevention                                                                                                             | 2020-02-28 | Jing Lu et al ( <a href="https://dx.doi.org/10.1016/j.cell.2020.04.023">https://dx.doi.org/10.1016/j.cell.2020.04.023</a> )                 |
| GuangzhouGZMUJ0054/2020       | EPI_SL_420968 | The First Affiliated Hospital of Guangzhou Medical University                                                                                                                                                                 | 2020-01-29 | Yanqun Wang et al                                                                                                                           |
| GuangzhouGZMUJ0078/2020       | EPI_SL_457690 | The First Affiliated Hospital of Guangzhou Medical University, Guangzhou, China                                                                                                                                               | 2020-02-11 | Yanqun Wang et al                                                                                                                           |
| GuangzhouGZMUJ0101/2020       | EPI_SL_457691 | The First Affiliated Hospital of Guangzhou Medical University, Guangzhou, China                                                                                                                                               | 2020-02-20 | Yanqun Wang et al                                                                                                                           |
| GuangzhouGZMUJ0117/2020       | EPI_SL_457698 | The First Affiliated Hospital of Guangzhou Medical University, Guangzhou, China                                                                                                                                               | 2020-02-26 | Yanqun Wang et al                                                                                                                           |
| HangzhouHZ162/2020            | EPI_SL_418508 | Hangzhou Center for Disease Control and Prevention                                                                                                                                                                            | 2020-01-23 | Yu hua et al                                                                                                                                |
| HangzhouHZ48/2020             | EPI_SL_418441 | Hangzhou Center for Disease Control and Prevention                                                                                                                                                                            | 2020-01-21 | Yu hua et al                                                                                                                                |
| HangzhouHZ49/2020             | EPI_SL_418442 | Hangzhou Center for Disease Control and Prevention                                                                                                                                                                            | 2020-01-21 | Yu hua et al                                                                                                                                |
| HangzhouHZ638/2020            | EPI_SL_418515 | Hangzhou Center for Disease Control and Prevention                                                                                                                                                                            | 2020-01-25 | Yu hua et al                                                                                                                                |
| HangzhouZJU-08/2020           | EPI_SL_416473 | State Key Laboratory for Diagnosis and Treatment of Infectious Diseases, National Clinical Research Center for Infectious Diseases, First Affiliated Hospital, Zhejiang University School of Medicine, Hangzhou, China 310003 | 2020-01-26 | Hangqing Yao et al ( <a href="https://dx.doi.org/10.1056/NEJMoa2006100">https://dx.doi.org/10.1056/NEJMoa2006100</a> )                      |
| HangzhouZJU-09/2020           | EPI_SL_416474 | State Key Laboratory for Diagnosis and Treatment of Infectious Diseases, National Clinical Research Center for Infectious Diseases, First Affiliated Hospital, Zhejiang University School of Medicine, Hangzhou, China 310003 | 2020-01-28 | Hangqing Yao et al ( <a href="https://dx.doi.org/10.1056/NEJMoa2006100">https://dx.doi.org/10.1056/NEJMoa2006100</a> )                      |
| HarbinHRB-26/2020             | EPI_SL_420455 | Zoonotic and Exotic Infection Diseases Division, Harbin Veterinary Research Institute, CAAS                                                                                                                                   | 2020-03-02 | Zhigao Bu et al                                                                                                                             |
| HongKongHKPU102_2802/2020     | EPI_SL_420455 | Department of Clinical Pathology, Pamela Youde Nethersole Eastern Hospital                                                                                                                                                    | 2020-03-04 | Kenneth Su-Sing LEUNG et al ( <a href="https://dx.doi.org/10.1101/2020.03.30.20045740">https://dx.doi.org/10.1101/2020.03.30.20045740</a> ) |
| HongKongHKPU12_2201/2020      | EPI_SL_417179 | Department of Pathology, Princess Margaret Hospital                                                                                                                                                                           | 2020-01-30 | Kenneth Su-Sing LEUNG et al ( <a href="https://dx.doi.org/10.1101/2020.03.30.20045740">https://dx.doi.org/10.1101/2020.03.30.20045740</a> ) |
| HongKongHKPU19_0402/2020      | EPI_SL_417181 | Department of Pathology, United Christian Hospital                                                                                                                                                                            | 2020-02-05 | Kenneth Su-Sing LEUNG et al ( <a href="https://dx.doi.org/10.1101/2020.03.30.20045740">https://dx.doi.org/10.1101/2020.03.30.20045740</a> ) |
| HongKongHKPU2_1801/2020       | EPI_SL_417177 | Department of Pathology, Princess Margaret Hospital                                                                                                                                                                           | 2020-01-23 | Kenneth Su-Sing LEUNG et al ( <a href="https://dx.doi.org/10.1101/2020.03.30.20045740">https://dx.doi.org/10.1101/2020.03.30.20045740</a> ) |
| HongKongHKPU20_3001/2020      | EPI_SL_417182 | Department of Pathology, United Christian Hospital                                                                                                                                                                            | 2020-02-05 | Kenneth Su-Sing LEUNG et al ( <a href="https://dx.doi.org/10.1101/2020.03.30.20045740">https://dx.doi.org/10.1101/2020.03.30.20045740</a> ) |
| HongKongHKPU23_2601/2020      | EPI_SL_417183 | Department of Clinical Pathology, Pamela Youde Nethersole Eastern Hospital                                                                                                                                                    | 2020-01-30 | Kenneth Su-Sing LEUNG et al ( <a href="https://dx.doi.org/10.1101/2020.03.30.20045740">https://dx.doi.org/10.1101/2020.03.30.20045740</a> ) |
| HongKongHKPU29_0102/2020      | EPI_SL_417187 | Department of Clinical Pathology, Pamela Youde Nethersole Eastern Hospital                                                                                                                                                    | 2020-02-08 | Kenneth Su-Sing LEUNG et al ( <a href="https://dx.doi.org/10.1101/2020.03.30.20045740">https://dx.doi.org/10.1101/2020.03.30.20045740</a> ) |
| HongKongHKPU30_2901/2020      | EPI_SL_417188 | Department of Clinical Pathology, Pamela Youde Nethersole Eastern Hospital                                                                                                                                                    | 2020-02-08 | Kenneth Su-Sing LEUNG et al ( <a href="https://dx.doi.org/10.1101/2020.03.30.20045740">https://dx.doi.org/10.1101/2020.03.30.20045740</a> ) |
| HongKongHKPU32_0402/2020      | EPI_SL_417193 | Department of Clinical Pathology, Pamela Youde Nethersole Eastern Hospital                                                                                                                                                    | 2020-02-09 | Kenneth Su-Sing LEUNG et al ( <a href="https://dx.doi.org/10.1101/2020.03.30.20045740">https://dx.doi.org/10.1101/2020.03.30.20045740</a> ) |
| HongKongHKPU33_0202/2020      | EPI_SL_417195 | Department of Clinical Pathology, Pamela Youde Nethersole Eastern Hospital                                                                                                                                                    | 2020-02-09 | Kenneth Su-Sing LEUNG et al ( <a href="https://dx.doi.org/10.1101/2020.03.30.20045740">https://dx.doi.org/10.1101/2020.03.30.20045740</a> ) |
| HongKongHKPU34_3001/2020      | EPI_SL_417197 | Department of Clinical Pathology, Pamela Youde Nethersole Eastern Hospital                                                                                                                                                    | 2020-02-09 | Kenneth Su-Sing LEUNG et al ( <a href="https://dx.doi.org/10.1101/2020.03.30.20045740">https://dx.doi.org/10.1101/2020.03.30.20045740</a> ) |
| HongKongHKPU35_0402/2020      | EPI_SL_417199 | Department of Clinical Pathology, Pamela Youde Nethersole Eastern Hospital                                                                                                                                                    | 2020-02-09 | Chong-Yee YAU et al ( <a href="https://dx.doi.org/10.1101/2020.03.30.20045740">https://dx.doi.org/10.1101/2020.03.30.20045740</a> )         |
| HongKongHKPU38-3001/2020      | EPI_SL_419213 | Department of Clinical Pathology, Pamela Youde Nethersole Eastern Hospital                                                                                                                                                    | 2020-02-09 | Kenneth Su-Sing LEUNG et al ( <a href="https://dx.doi.org/10.1101/2020.03.30.20045740">https://dx.doi.org/10.1101/2020.03.30.20045740</a> ) |
| HongKongHKPU40-2801/2020      | EPI_SL_419215 | Department of Clinical Pathology, Pamela Youde Nethersole Eastern Hospital                                                                                                                                                    | 2020-02-10 | Kenneth Su-Sing LEUNG et al ( <a href="https://dx.doi.org/10.1101/2020.03.30.20045740">https://dx.doi.org/10.1101/2020.03.30.20045740</a> ) |
| HongKongHKPU42-0302/2020      | EPI_SL_419217 | Department of Pathology, Princess Margaret Hospital                                                                                                                                                                           | 2020-02-10 | Kenneth Su-Sing LEUNG et al ( <a href="https://dx.doi.org/10.1101/2020.03.30.20045740">https://dx.doi.org/10.1101/2020.03.30.20045740</a> ) |
| HongKongHKPU54-0302/2020      | EPI_SL_419226 | Department of Clinical Pathology, Pamela Youde Nethersole Eastern Hospital                                                                                                                                                    | 2020-02-13 | Kenneth Su-Sing LEUNG et al ( <a href="https://dx.doi.org/10.1101/2020.03.30.20045740">https://dx.doi.org/10.1101/2020.03.30.20045740</a> ) |
| HongKongHKPU57-0702/2020      | EPI_SL_419227 | Department of Clinical Pathology, Pamela Youde Nethersole Eastern Hospital                                                                                                                                                    | 2020-02-15 | Kenneth Su-Sing LEUNG et al ( <a href="https://dx.doi.org/10.1101/2020.03.30.20045740">https://dx.doi.org/10.1101/2020.03.30.20045740</a> ) |
| HongKongHKPU8_2101/2020       | EPI_SL_417178 | Department of Pathology, Princess Margaret Hospital                                                                                                                                                                           | 2020-01-25 | Kenneth Su-Sing LEUNG et al ( <a href="https://dx.doi.org/10.1101/2020.03.30.20045740">https://dx.doi.org/10.1101/2020.03.30.20045740</a> ) |
| HongKongHKPU80-0802/2020      | EPI_SL_419228 | Department of Clinical Pathology, Pamela Youde Nethersole Eastern Hospital                                                                                                                                                    | 2020-02-17 | Kenneth Su-Sing LEUNG et al ( <a href="https://dx.doi.org/10.1101/2020.03.30.20045740">https://dx.doi.org/10.1101/2020.03.30.20045740</a> ) |
| HongKongHKPU81-0202/2020      | EPI_SL_419229 | Department of Clinical Pathology, Pamela Youde Nethersole Eastern Hospital                                                                                                                                                    | 2020-02-17 | Kenneth Su-Sing LEUNG et al ( <a href="https://dx.doi.org/10.1101/2020.03.30.20045740">https://dx.doi.org/10.1101/2020.03.30.20045740</a> ) |
| HongKongHKPU86-2501/2020      | EPI_SL_419242 | Department of Clinical Pathology, Tum Mun Hospital                                                                                                                                                                            | 2020-02-23 | Kenneth Su-Sing LEUNG et al ( <a href="https://dx.doi.org/10.1101/2020.03.30.20045740">https://dx.doi.org/10.1101/2020.03.30.20045740</a> ) |
| HongKongHKPU70-1302/2020      | EPI_SL_419243 | Department of Clinical Pathology, Pamela Youde Nethersole Eastern Hospital                                                                                                                                                    | 2020-02-22 | Kenneth Su-Sing LEUNG et al ( <a href="https://dx.doi.org/10.1101/2020.03.30.20045740">https://dx.doi.org/10.1101/2020.03.30.20045740</a> ) |
| HongKongHKPU73-0802/2020      | EPI_SL_419244 | Department of Clinical Pathology, Pamela Youde Nethersole Eastern Hospital                                                                                                                                                    | 2020-02-22 | Kenneth Su-Sing LEUNG et al ( <a href="https://dx.doi.org/10.1101/2020.03.30.20045740">https://dx.doi.org/10.1101/2020.03.30.20045740</a> ) |
| HongKongHKPU74-1302/2020      | EPI_SL_419245 | Department of Clinical Pathology, Pamela Youde Nethersole Eastern Hospital                                                                                                                                                    | 2020-02-22 | Kenneth Su-Sing LEUNG et al ( <a href="https://dx.doi.org/10.1101/2020.03.30.20045740">https://dx.doi.org/10.1101/2020.03.30.20045740</a> ) |
| HongKongHKPU84-2502/2020      | EPI_SL_419248 | Department of Clinical Pathology, Pamela Youde Nethersole Eastern Hospital                                                                                                                                                    | 2020-02-24 | Kenneth Su-Sing LEUNG et al ( <a href="https://dx.doi.org/10.1101/2020.03.30.20045740">https://dx.doi.org/10.1101/2020.03.30.20045740</a> ) |
| HongKongHKPU86-1802/2020      | EPI_SL_419249 | Department of Clinical Pathology, Pamela Youde Nethersole Eastern Hospital                                                                                                                                                    | 2020-02-25 | Kenneth Su-Sing LEUNG et al ( <a href="https://dx.doi.org/10.1101/2020.03.30.20045740">https://dx.doi.org/10.1101/2020.03.30.20045740</a> ) |
| HongKongHKPU89-2502/2020      | EPI_SL_419250 | Department of Clinical Pathology, Pamela Youde Nethersole Eastern Hospital                                                                                                                                                    | 2020-02-26 | Kenneth Su-Sing LEUNG et al ( <a href="https://dx.doi.org/10.1101/2020.03.30.20045740">https://dx.doi.org/10.1101/2020.03.30.20045740</a> ) |
| HongKongHKPU91-2002/2020      | EPI_SL_419252 | Department of Clinical Pathology, Pamela Youde Nethersole Eastern Hospital                                                                                                                                                    | 2020-02-26 | Kenneth Su-Sing LEUNG et al ( <a href="https://dx.doi.org/10.1101/2020.03.30.20045740">https://dx.doi.org/10.1101/2020.03.30.20045740</a> ) |
| HongKongHKPU92-1302/2020      | EPI_SL_419253 | Department of Pathology, United Christian Hospital                                                                                                                                                                            | 2020-02-28 | Kenneth Su-Sing LEUNG et al ( <a href="https://dx.doi.org/10.1101/2020.03.30.20045740">https://dx.doi.org/10.1101/2020.03.30.20045740</a> ) |
| HongKongHKSH8003/2020         | EPI_SL_430018 | Molecular Pathology Division, Department of Pathology, Hong Kong Sanatorium & Hospital                                                                                                                                        | 2020-03-14 | Chun Hang AU et al                                                                                                                          |
| HongKongHKSH8004/2020         | EPI_SL_430063 | Molecular Pathology Division, Department of Pathology, Hong Kong Sanatorium & Hospital                                                                                                                                        | 2020-03-14 | Chun Hang AU et al                                                                                                                          |
| HongKongHKSH8007/2020         | EPI_SL_451957 | Molecular Pathology Division, Department of Pathology, Hong Kong Sanatorium & Hospital                                                                                                                                        | 2020-04-01 | Chun Hang AU et al                                                                                                                          |
| HongKongHKU-902a/2020         | EPI_SL_434563 | Microbiology                                                                                                                                                                                                                  | 2020-01-23 | To et al                                                                                                                                    |
| HongKongHKU-902b/2020         | EPI_SL_434564 | Microbiology                                                                                                                                                                                                                  | 2020-01-24 | To et al                                                                                                                                    |
| HongKongHKU-903a/2020         | EPI_SL_434565 | Microbiology                                                                                                                                                                                                                  | 2020-01-24 | To et al                                                                                                                                    |
| HongKongHKU-903b/2020         | EPI_SL_434566 | Microbiology                                                                                                                                                                                                                  | 2020-01-27 | To et al                                                                                                                                    |
| HongKongHKU-905a/2020         | EPI_SL_450408 | Microbiology                                                                                                                                                                                                                  | 2020-01-24 | To et al                                                                                                                                    |
| HongKongHKU-908a/2020         | EPI_SL_434569 | Microbiology                                                                                                                                                                                                                  | 2020-01-27 | To et al                                                                                                                                    |
| HongKongHKU-908b/2020         | EPI_SL_434570 | Microbiology                                                                                                                                                                                                                  | 2020-01-29 | To et al                                                                                                                                    |
| HongKongHKU-911a/2020         | EPI_SL_450409 | Microbiology                                                                                                                                                                                                                  | 2020-01-30 | To et al                                                                                                                                    |
| HongKongVB20017970-2/2020     | EPI_SL_417084 | Prince of Wales Hospital                                                                                                                                                                                                      | 2020-01-21 | Alan K.L. Tsang et al                                                                                                                       |
| HongKongVB20024950-2/2020     | EPI_SL_412029 | Hong Kong Department of Health                                                                                                                                                                                                | 2020-01-30 | Dominic N.C. Tsang et al                                                                                                                    |
| HongKongVM20002507-2/2020     | EPI_SL_414528 | Hong Kong Department of Health                                                                                                                                                                                                | 2020-02-10 | Dominic N.C. Tsang et al                                                                                                                    |
| HongKongVM20002582-2/2020     | EPI_SL_414569 | Hong Kong Department of Health                                                                                                                                                                                                | 2020-02-12 | Dominic N.C. Tsang et al                                                                                                                    |
| HongKongVM20002907/2020       | EPI_SL_414517 | Hong Kong Department of Health                                                                                                                                                                                                | 2020-02-25 | Dominic N.C. Tsang et al                                                                                                                    |
| HongKongVM20009579/2020       | EPI_SL_450404 | School of Public Health                                                                                                                                                                                                       | 2020-03-16 | Sit et al                                                                                                                                   |
| HongKongVM2003179/2020        | EPI_SL_450405 | School of Public Health                                                                                                                                                                                                       | 2020-03-08 | Sit et al                                                                                                                                   |
| HungaryMBL-002/2020           | EPI_SL_435420 | Viological Research Group, Szentgotthald Research Centre                                                                                                                                                                      | 2020-03-23 | Péter Urbán et al                                                                                                                           |
| HungaryMBL-003/2020           | EPI_SL_435421 | Viological Research Group, Szentgotthald Research Centre                                                                                                                                                                      | 2020-03-25 | Péter Urbán et al                                                                                                                           |
| HungaryMBL-464/2020           | EPI_SL_435422 | Viological Research Group, Szentgotthald Research Centre                                                                                                                                                                      | 2020-03-27 | Péter Urbán et al                                                                                                                           |
| HungaryMBL-465/2020           | EPI_SL_435423 | Viological Research Group, Szentgotthald Research Centre                                                                                                                                                                      | 2020-03-27 | Péter Urbán et al                                                                                                                           |
| HungaryMBL-469/2020           | EPI_SL_435424 | Viological Research Group, Szentgotthald Research Centre                                                                                                                                                                      | 2020-03-27 | Péter Urbán et al                                                                                                                           |
| Hungarymb2/2020               | EPI_SL_418183 | Viological Research Group, Szentgotthald Research Centre                                                                                                                                                                      | 2020-03-17 | Péter Urbán et al                                                                                                                           |
| Hungarymb49/2020              | EPI_SL_416744 | Viological Research Group, Szentgotthald Research Centre                                                                                                                                                                      | 2020-03-20 | Péter Urbán et al                                                                                                                           |
| HungarySRC-00055/2020         | EPI_SL_435419 | Viological Research Group, Szentgotthald Research Centre                                                                                                                                                                      | 2020-03-20 | Péter Urbán et al                                                                                                                           |
| HungarySRC-00066/2020         | EPI_SL_435403 | Viological Research Group, Szentgotthald Research Centre                                                                                                                                                                      | 2020-03-20 | Péter Urbán et al                                                                                                                           |
| HungarySRC-00067/2020         | EPI_SL_435404 | Viological Research Group, Szentgotthald Research Centre                                                                                                                                                                      | 2020-03-20 | Péter Urbán et al                                                                                                                           |
| HungarySRC-00105w/2020        | EPI_SL_435426 | Viological Research Group, Szentgotthald Research Centre                                                                                                                                                                      | 2020-03-21 | Péter Urbán et al                                                                                                                           |
| HungarySRC-00126/2020         | EPI_SL_435405 | Viological Research Group, Szentgotthald Research Centre                                                                                                                                                                      | 2020-03-22 | Péter Urbán et al                                                                                                                           |
| HungarySRC-00175/2020         | EPI_SL_435406 | Viological Research Group, Szentgotthald Research Centre                                                                                                                                                                      | 2020-03-22 | Péter Urbán et al                                                                                                                           |
| HungarySRC-00183/2020         | EPI_SL_435407 | Viological Research Group, Szentgotthald Research Centre                                                                                                                                                                      | 2020-03-22 | Péter Urbán et al                                                                                                                           |
| HungarySRC-00186/2020         | EPI_SL_435408 | Viological Research Group, Szentgotthald Research Centre                                                                                                                                                                      | 2020-03-22 | Péter Urbán et al                                                                                                                           |
| HungarySRC-00278w/2020        | EPI_SL_435427 | Viological Research Group, Szentgotthald Research Centre                                                                                                                                                                      | 2020-03-25 | Péter Urbán et al                                                                                                                           |
| HungarySRC-00417/2020         | EPI_SL_435409 | Viological Research Group, Szentgotthald Research Centre                                                                                                                                                                      | 2020-03-25 | Péter Urbán et al                                                                                                                           |
| HungarySRC-00419/2020         | EPI_SL_435410 | Viological Research Group, Szentgotthald Research Centre                                                                                                                                                                      | 2020-03-26 | Péter Urbán et al                                                                                                                           |
| HungarySRC-00541/2020         | EPI_SL_435411 | Viological Research Group, Szentgotthald Research Centre                                                                                                                                                                      | 2020-03-27 | Péter Urbán et al                                                                                                                           |
| HungarySRC-00572w/2020        | EPI_SL_435431 | Viological Research Group, Szentgotthald Research Centre                                                                                                                                                                      | 2020-03-25 | Péter Urbán et al                                                                                                                           |
| HungarySRC-00620/2020         | EPI_SL_435416 | Viological Research Group, Szentgotthald Research Centre                                                                                                                                                                      | 2020-03-27 | Péter Urbán et al                                                                                                                           |
| HungarySRC-00777/2020         | EPI_SL_435417 | Viological Research Group, Szentgotthald Research Centre                                                                                                                                                                      | 2020-03-30 | Péter Urbán et al                                                                                                                           |
| HungarySRC-00792/2020         | EPI_SL_435412 | Viological Research Group, Szentgotthald Research Centre                                                                                                                                                                      | 2020-03-30 | Péter Urbán et al                                                                                                                           |
| HungarySRC-00817/2020         | EPI_SL_435413 | Viological Research Group, Szentgotthald Research Centre                                                                                                                                                                      | 2020-03-30 | Péter Urbán et al                                                                                                                           |
| HungarySRC-00827/2020         | EPI_SL_435414 | Viological Research Group, Szentgotthald Research Centre                                                                                                                                                                      | 2020-03-30 | Péter Urbán et al                                                                                                                           |
| HungarySRC-00836/2020         | EPI_SL_435415 | Viological Research Group, Szentgotthald Research Centre                                                                                                                                                                      | 2020-03-30 | Péter Urbán et al                                                                                                                           |
| HungarySRC-001136/2020        | EPI_SL_435418 | Viological Research Group, Szentgotthald Research Centre                                                                                                                                                                      | 2020-04-02 | Péter Urbán et al                                                                                                                           |
| HungarySRC-02801w/2020        | EPI_SL_435428 | Viological Research Group, Szentgotthald Research Centre                                                                                                                                                                      | 2020-03-25 | Péter Urbán et al                                                                                                                           |
| HungarySRC-03597w/2020        | EPI_SL_435429 | Viological Research Group, Szentgotthald Research Centre                                                                                                                                                                      | 2020-03-28 | Péter Urbán et al                                                                                                                           |

|                        |                |                                                                                                |                                                                                                                                        |            |                                                                                                                                                                                                                                                                                                                                                                                  |
|------------------------|----------------|------------------------------------------------------------------------------------------------|----------------------------------------------------------------------------------------------------------------------------------------|------------|----------------------------------------------------------------------------------------------------------------------------------------------------------------------------------------------------------------------------------------------------------------------------------------------------------------------------------------------------------------------------------|
| HungarySRC-03670/2020  | EPI_ISL_43540  | Virological Research Group, Szentágotai Research Centre                                        | Bioinformatics Research Group, Szentágotai Research Centre                                                                             | 2020-03-29 | Péter Urbán et al                                                                                                                                                                                                                                                                                                                                                                |
| HungarySRC-17886/2020  | EPI_ISL_435425 | Virological Research Group, Szentágotai Research Centre                                        | Bioinformatics Research Group, Szentágotai Research Centre                                                                             | 2020-03-19 | Péter Urbán et al                                                                                                                                                                                                                                                                                                                                                                |
| Iceland138/2020        | EPI_ISL_417720 | The National University Hospital of Iceland                                                    | deCODE genetics                                                                                                                        | 2020-03-12 | Danief F Gudbjartsson et al ( <a href="https://doi.org/10.1056/NEJMoa2006100">https://doi.org/10.1056/NEJMoa2006100</a> )                                                                                                                                                                                                                                                        |
| Iceland222/2020        | EPI_ISL_417837 | The National University Hospital of Iceland                                                    | deCODE genetics                                                                                                                        | 2020-03-16 | Danief F Gudbjartsson et al ( <a href="https://doi.org/10.1056/NEJMoa2006100">https://doi.org/10.1056/NEJMoa2006100</a> )                                                                                                                                                                                                                                                        |
| Iceland228/2020        | EPI_ISL_417556 | The National University Hospital of Iceland                                                    | deCODE genetics                                                                                                                        | 2020-03-17 | Danief F Gudbjartsson et al ( <a href="https://doi.org/10.1056/NEJMoa2006100">https://doi.org/10.1056/NEJMoa2006100</a> )                                                                                                                                                                                                                                                        |
| Iceland291/2020        | EPI_ISL_417620 | The National University Hospital of Iceland                                                    | deCODE genetics                                                                                                                        | 2020-03-18 | Danief F Gudbjartsson et al ( <a href="https://doi.org/10.1056/NEJMoa2006100">https://doi.org/10.1056/NEJMoa2006100</a> )                                                                                                                                                                                                                                                        |
| Iceland296/2020        | EPI_ISL_417625 | The National University Hospital of Iceland                                                    | deCODE genetics                                                                                                                        | 2020-03-18 | Danief F Gudbjartsson et al ( <a href="https://doi.org/10.1056/NEJMoa2006100">https://doi.org/10.1056/NEJMoa2006100</a> )                                                                                                                                                                                                                                                        |
| Iceland299/2020        | EPI_ISL_417628 | The National University Hospital of Iceland                                                    | deCODE genetics                                                                                                                        | 2020-03-18 | Danief F Gudbjartsson et al ( <a href="https://doi.org/10.1056/NEJMoa2006100">https://doi.org/10.1056/NEJMoa2006100</a> )                                                                                                                                                                                                                                                        |
| Iceland320/2020        | EPI_ISL_417649 | The National University Hospital of Iceland                                                    | deCODE genetics                                                                                                                        | 2020-03-18 | Danief F Gudbjartsson et al ( <a href="https://doi.org/10.1056/NEJMoa2006100">https://doi.org/10.1056/NEJMoa2006100</a> )                                                                                                                                                                                                                                                        |
| Iceland353/2020        | EPI_ISL_424377 | deCODE genetics                                                                                | deCODE genetics                                                                                                                        | 2020-03-18 | Danief F Gudbjartsson et al ( <a href="https://doi.org/10.1056/NEJMoa2006100">https://doi.org/10.1056/NEJMoa2006100</a> )                                                                                                                                                                                                                                                        |
| Iceland380/2020        | EPI_ISL_424404 | The National University Hospital of Iceland                                                    | deCODE genetics                                                                                                                        | 2020-03-19 | Danief F Gudbjartsson et al ( <a href="https://doi.org/10.1056/NEJMoa2006100">https://doi.org/10.1056/NEJMoa2006100</a> )                                                                                                                                                                                                                                                        |
| Iceland386/2020        | EPI_ISL_424410 | The National University Hospital of Iceland                                                    | deCODE genetics                                                                                                                        | 2020-03-19 | Danief F Gudbjartsson et al ( <a href="https://doi.org/10.1056/NEJMoa2006100">https://doi.org/10.1056/NEJMoa2006100</a> )                                                                                                                                                                                                                                                        |
| Iceland389/2020        | EPI_ISL_424413 | The National University Hospital of Iceland                                                    | deCODE genetics                                                                                                                        | 2020-03-19 | Danief F Gudbjartsson et al ( <a href="https://doi.org/10.1056/NEJMoa2006100">https://doi.org/10.1056/NEJMoa2006100</a> )                                                                                                                                                                                                                                                        |
| Iceland418/2020        | EPI_ISL_424442 | The National University Hospital of Iceland                                                    | deCODE genetics                                                                                                                        | 2020-03-19 | Danief F Gudbjartsson et al ( <a href="https://doi.org/10.1056/NEJMoa2006100">https://doi.org/10.1056/NEJMoa2006100</a> )                                                                                                                                                                                                                                                        |
| Iceland436/2020        | EPI_ISL_424460 | The National University Hospital of Iceland                                                    | deCODE genetics                                                                                                                        | 2020-03-20 | Danief F Gudbjartsson et al ( <a href="https://doi.org/10.1056/NEJMoa2006100">https://doi.org/10.1056/NEJMoa2006100</a> )                                                                                                                                                                                                                                                        |
| Iceland451/2020        | EPI_ISL_424475 | The National University Hospital of Iceland                                                    | deCODE genetics                                                                                                                        | 2020-03-20 | Danief F Gudbjartsson et al ( <a href="https://doi.org/10.1056/NEJMoa2006100">https://doi.org/10.1056/NEJMoa2006100</a> )                                                                                                                                                                                                                                                        |
| Iceland472/2020        | EPI_ISL_417683 | The National University Hospital of Iceland                                                    | deCODE genetics                                                                                                                        | 2020-03-05 | Danief F Gudbjartsson et al ( <a href="https://doi.org/10.1056/NEJMoa2006100">https://doi.org/10.1056/NEJMoa2006100</a> )                                                                                                                                                                                                                                                        |
| Iceland472/2020        | EPI_ISL_424495 | The National University Hospital of Iceland                                                    | deCODE genetics                                                                                                                        | 2020-03-20 | Danief F Gudbjartsson et al ( <a href="https://doi.org/10.1056/NEJMoa2006100">https://doi.org/10.1056/NEJMoa2006100</a> )                                                                                                                                                                                                                                                        |
| Iceland474/2020        | EPI_ISL_424497 | The National University Hospital of Iceland                                                    | deCODE genetics                                                                                                                        | 2020-03-20 | Danief F Gudbjartsson et al ( <a href="https://doi.org/10.1056/NEJMoa2006100">https://doi.org/10.1056/NEJMoa2006100</a> )                                                                                                                                                                                                                                                        |
| Iceland485/2020        | EPI_ISL_424508 | The National University Hospital of Iceland                                                    | deCODE genetics                                                                                                                        | 2020-03-20 | Danief F Gudbjartsson et al ( <a href="https://doi.org/10.1056/NEJMoa2006100">https://doi.org/10.1056/NEJMoa2006100</a> )                                                                                                                                                                                                                                                        |
| Iceland489/2020        | EPI_ISL_417718 | The National University Hospital of Iceland                                                    | deCODE genetics                                                                                                                        | 2020-03-05 | Danief F Gudbjartsson et al ( <a href="https://doi.org/10.1056/NEJMoa2006100">https://doi.org/10.1056/NEJMoa2006100</a> )                                                                                                                                                                                                                                                        |
| Iceland73/2020         | EPI_ISL_417861 | The National University Hospital of Iceland                                                    | deCODE genetics                                                                                                                        | 2020-03-09 | Danief F Gudbjartsson et al ( <a href="https://doi.org/10.1056/NEJMoa2006100">https://doi.org/10.1056/NEJMoa2006100</a> )                                                                                                                                                                                                                                                        |
| Iceland82/2020         | EPI_ISL_417867 | The National University Hospital of Iceland                                                    | deCODE genetics                                                                                                                        | 2020-03-09 | Danief F Gudbjartsson et al ( <a href="https://doi.org/10.1056/NEJMoa2006100">https://doi.org/10.1056/NEJMoa2006100</a> )                                                                                                                                                                                                                                                        |
| Iceland83/2020         | EPI_ISL_417868 | The National University Hospital of Iceland                                                    | deCODE genetics                                                                                                                        | 2020-03-09 | Danief F Gudbjartsson et al ( <a href="https://doi.org/10.1056/NEJMoa2006100">https://doi.org/10.1056/NEJMoa2006100</a> )                                                                                                                                                                                                                                                        |
| Iceland97/2020         | EPI_ISL_417876 | The National University Hospital of Iceland                                                    | deCODE genetics                                                                                                                        | 2020-03-10 | Danief F Gudbjartsson et al ( <a href="https://doi.org/10.1056/NEJMoa2006100">https://doi.org/10.1056/NEJMoa2006100</a> )                                                                                                                                                                                                                                                        |
| India-217/2020         | EPI_ISL_413522 | Indian Council of Medical Research - National Institute of Virology                            | deCODE genetics<br>National Influenza Center, Indian Council of Medical Research - National Institute of Virology                      | 2020-01-27 | Potdar V et al A ( <a href="https://doi.org/10.1038/nm.4663">https://doi.org/10.1038/nm.4663</a> )<br>Prayaga D, Yadav et al A ( <a href="http://www.jmri.org.in/article.asp?issn=0971-5910;year=2020;volume=151;issue=2;page=255;epage=260;ajust=Post-ar">http://www.jmri.org.in/article.asp?issn=0971-5910;year=2020;volume=151;issue=2;page=255;epage=260;ajust=Post-ar</a> ) |
| India1073/2020         | EPI_ISL_421662 | National Influenza Center, Indian Council of Medical Research - National Institute of Virology | Indian Council of Medical Research-National Institute of Virology, Microbial Containment Complex                                       | 2020-03-10 | Prayaga D, Yadav et al A ( <a href="http://www.jmri.org.in/article.asp?issn=0971-5910;year=2020;volume=151;issue=2;page=255;epage=260;ajust=Post-ar">http://www.jmri.org.in/article.asp?issn=0971-5910;year=2020;volume=151;issue=2;page=255;epage=260;ajust=Post-ar</a> )                                                                                                       |
| India1100/2020         | EPI_ISL_421664 | National Influenza Center, Indian Council of Medical Research - National Institute of Virology | Indian Council of Medical Research-National Institute of Virology, Microbial Containment Complex                                       | 2020-03-10 | Prayaga D, Yadav et al A ( <a href="http://www.jmri.org.in/article.asp?issn=0971-5910;year=2020;volume=151;issue=2;page=255;epage=260;ajust=Post-ar">http://www.jmri.org.in/article.asp?issn=0971-5910;year=2020;volume=151;issue=2;page=255;epage=260;ajust=Post-ar</a> )                                                                                                       |
| India1111/2020         | EPI_ISL_421666 | National Influenza Center, Indian Council of Medical Research - National Institute of Virology | Indian Council of Medical Research-National Institute of Virology, Microbial Containment Complex                                       | 2020-03-10 | Prayaga D, Yadav et al A ( <a href="http://www.jmri.org.in/article.asp?issn=0971-5910;year=2020;volume=151;issue=2;page=255;epage=260;ajust=Post-ar">http://www.jmri.org.in/article.asp?issn=0971-5910;year=2020;volume=151;issue=2;page=255;epage=260;ajust=Post-ar</a> )                                                                                                       |
| India1135/2020         | EPI_ISL_423432 | National Influenza Center, Indian Council of Medical Research - National Institute of Virology | Indian Council of Medical Research-National Institute of Virology, Microbial Containment Complex                                       | 2020-03-10 | Prayaga D, Yadav et al A ( <a href="http://www.jmri.org.in/article.asp?issn=0971-5910;year=2020;volume=151;issue=2;page=255;epage=260;ajust=Post-ar">http://www.jmri.org.in/article.asp?issn=0971-5910;year=2020;volume=151;issue=2;page=255;epage=260;ajust=Post-ar</a> )                                                                                                       |
| India/CCMB_C4_15/2020  | EPI_ISL_447587 | Tamil Nadu Veterinary and Animal Sciences University                                           | CSIR-Centre for Cellular and Molecular Biology                                                                                         | 2020-04-20 | K Kaveel et al ( <a href="https://doi.org/10.1101/2020.05.31.126136">https://doi.org/10.1101/2020.05.31.126136</a> )                                                                                                                                                                                                                                                             |
| India/CCMB_C9/2020     | EPI_ISL_456038 | King Institute of Preventive Medicine & Research                                               | CSIR-Centre for Cellular and Molecular Biology                                                                                         | 2020-04-29 | K Kaveel et al                                                                                                                                                                                                                                                                                                                                                                   |
| India/CCMB_J009/2020   | EPI_ISL_447557 | CSIR-Centre for Cellular and Molecular Biology                                                 | CSIR-Centre for Cellular and Molecular Biology                                                                                         | 2020-03-30 | Pavai Mukhejee et al ( <a href="https://doi.org/10.1101/2020.05.31.126136">https://doi.org/10.1101/2020.05.31.126136</a> )                                                                                                                                                                                                                                                       |
| India/CCMB_J057/2020   | EPI_ISL_447563 | CSIR-Centre for Cellular and Molecular Biology                                                 | CSIR-Centre for Cellular and Molecular Biology                                                                                         | 2020-03-31 | Sakshi Shambavi et al A ( <a href="https://doi.org/10.1101/2020.05.31.126136">https://doi.org/10.1101/2020.05.31.126136</a> )                                                                                                                                                                                                                                                    |
| India/CCMB_J067/2020   | EPI_ISL_447561 | CSIR-Centre for Cellular and Molecular Biology                                                 | CSIR-Centre for Cellular and Molecular Biology                                                                                         | 2020-03-31 | Sakshi Shambavi et al A ( <a href="https://doi.org/10.1101/2020.05.31.126136">https://doi.org/10.1101/2020.05.31.126136</a> )                                                                                                                                                                                                                                                    |
| India/CCMB_J207/2020   | EPI_ISL_447570 | CSIR-Centre for Cellular and Molecular Biology                                                 | CSIR-Centre for Cellular and Molecular Biology                                                                                         | 2020-04-01 | Laksh Zaven et al ( <a href="https://doi.org/10.1101/2020.05.31.126136">https://doi.org/10.1101/2020.05.31.126136</a> )                                                                                                                                                                                                                                                          |
| India/CCMB_J230/2020   | EPI_ISL_450331 | CSIR-Centre for Cellular and Molecular Biology                                                 | CSIR-Centre for Cellular and Molecular Biology                                                                                         | 2020-04-01 | Tanus Nagabandi et al ( <a href="https://doi.org/10.1101/2020.05.31.126136">https://doi.org/10.1101/2020.05.31.126136</a> )                                                                                                                                                                                                                                                      |
| India/CCMB_J458/2020   | EPI_ISL_447572 | CSIR-Centre for Cellular and Molecular Biology                                                 | CSIR-Centre for Cellular and Molecular Biology                                                                                         | 2020-04-01 | Laksh Zaven et al ( <a href="https://doi.org/10.1101/2020.05.31.126136">https://doi.org/10.1101/2020.05.31.126136</a> )                                                                                                                                                                                                                                                          |
| India/CCMB_K272/2020   | EPI_ISL_447575 | CSIR-Centre for Cellular and Molecular Biology                                                 | CSIR-Centre for Cellular and Molecular Biology                                                                                         | 2020-04-02 | Sofia Banu et al ( <a href="https://doi.org/10.1101/2020.05.31.126136">https://doi.org/10.1101/2020.05.31.126136</a> )                                                                                                                                                                                                                                                           |
| India/CCMB_L044/2020   | EPI_ISL_458070 | CSIR-Centre for Cellular and Molecular Biology                                                 | CSIR-Centre for Cellular and Molecular Biology                                                                                         | 2020-04-12 | Sakshi Shambavi et al B                                                                                                                                                                                                                                                                                                                                                          |
| India/CCMB_O2_P12/2020 | EPI_ISL_447864 | CSIR-Centre for Cellular and Molecular Biology                                                 | CSIR-Centre for Cellular and Molecular Biology                                                                                         | 2020-04-16 | Pavai Mukhejee et al ( <a href="https://doi.org/10.1101/2020.05.31.126136">https://doi.org/10.1101/2020.05.31.126136</a> )                                                                                                                                                                                                                                                       |
| IndiaGBRC104/2020      | EPI_ISL_451149 | M.P. Shah Government Medical College Jamnagar                                                  | Gujarat Biotechnology Research Centre                                                                                                  | 2020-05-07 | Dhivyadi Vadigan et al                                                                                                                                                                                                                                                                                                                                                           |
| IndiaGBRC122/2020      | EPI_ISL_455019 | Government Medical College, Vadodra                                                            | Gujarat Biotechnology Research Centre                                                                                                  | 2020-05-02 | Ramesh Pandit et al                                                                                                                                                                                                                                                                                                                                                              |
| IndiaGBRC124/2020      | EPI_ISL_455021 | Government Medical College, Vadodra                                                            | Gujarat Biotechnology Research Centre                                                                                                  | 2020-05-02 | Ankit Hirsu et al A                                                                                                                                                                                                                                                                                                                                                              |
| IndiaGBRC125/2020      | EPI_ISL_455022 | Government Medical College, Vadodra                                                            | Gujarat Biotechnology Research Centre                                                                                                  | 2020-05-02 | Prithesh Sabara et al B                                                                                                                                                                                                                                                                                                                                                          |
| IndiaGBRC132/2020      | EPI_ISL_458087 | B.J. Medical College and Civil hospital                                                        | Gujarat Biotechnology Research Centre                                                                                                  | 2020-05-24 | Ramesh Patel et al                                                                                                                                                                                                                                                                                                                                                               |
| IndiaGBRC138/2020      | EPI_ISL_458096 | B.J. Medical College and Civil hospital                                                        | Gujarat Biotechnology Research Centre                                                                                                  | 2020-05-24 | Dinesh Kumar et al                                                                                                                                                                                                                                                                                                                                                               |
| IndiaGBRC141/2020      | EPI_ISL_458103 | B.J. Medical College and Civil hospital                                                        | Gujarat Biotechnology Research Centre                                                                                                  | 2020-05-24 | Dhaval Vaghela et al                                                                                                                                                                                                                                                                                                                                                             |
| IndiaGBRC143/2020      | EPI_ISL_458103 | Gujarat Biotechnology Research Centre                                                          | Gujarat Biotechnology Research Centre                                                                                                  | 2020-05-24 | Ramesh Patel et al                                                                                                                                                                                                                                                                                                                                                               |
| IndiaGBRC151/2020      | EPI_ISL_461479 | Government Medical College, Vadodra                                                            | Gujarat Biotechnology Research Centre                                                                                                  | 2020-05-05 | Ramesh Pandit et al                                                                                                                                                                                                                                                                                                                                                              |
| IndiaGBRC159/2020      | EPI_ISL_461490 | B.J. Medical College and Civil hospital                                                        | Gujarat Biotechnology Research Centre                                                                                                  | 2020-05-02 | Neelam Nathani et al                                                                                                                                                                                                                                                                                                                                                             |
| IndiaGBRC159/2020      | EPI_ISL_461498 | B.J. Medical College and Civil hospital                                                        | Gujarat Biotechnology Research Centre                                                                                                  | 2020-05-27 | Azfar Ansari et al                                                                                                                                                                                                                                                                                                                                                               |
| IndiaGBRC159/2020      | EPI_ISL_467029 | GMERS Medical College and Hospital, Gandhinagar                                                | Gujarat Biotechnology Research Centre                                                                                                  | 2020-06-05 | Dipeshwari Shewale et al                                                                                                                                                                                                                                                                                                                                                         |
| IndiaGBRC159/2020      | EPI_ISL_467030 | GMERS Medical College and Hospital, Gandhinagar                                                | Gujarat Biotechnology Research Centre                                                                                                  | 2020-06-05 | Seema Bhat et al                                                                                                                                                                                                                                                                                                                                                                 |
| IndiaGBRC170/2020      | EPI_ISL_467031 | GMERS Medical College and Hospital, Gandhinagar                                                | Gujarat Biotechnology Research Centre                                                                                                  | 2020-06-05 | Gauravkankar Shirimali et al                                                                                                                                                                                                                                                                                                                                                     |
| IndiaGBRC170/2020      | EPI_ISL_467032 | GMERS Medical College and Hospital, Gandhinagar                                                | Gujarat Biotechnology Research Centre                                                                                                  | 2020-06-05 | Gauravkankar Shirimali et al                                                                                                                                                                                                                                                                                                                                                     |
| IndiaGBRC170/2020      | EPI_ISL_467033 | GMERS Medical College and Hospital, Gandhinagar                                                | Gujarat Biotechnology Research Centre                                                                                                  | 2020-06-05 | Bhuvan Modi et al                                                                                                                                                                                                                                                                                                                                                                |
| IndiaGBRC173/2020      | EPI_ISL_467035 | GMERS Medical College and Hospital, Gandhinagar                                                | Gujarat Biotechnology Research Centre                                                                                                  | 2020-06-05 | Bhuvan Modi et al                                                                                                                                                                                                                                                                                                                                                                |
| IndiaGBRC173/2020      | EPI_ISL_467036 | GMERS Medical College and Hospital, Gandhinagar                                                | Gujarat Biotechnology Research Centre                                                                                                  | 2020-06-05 | Tejas Shah et al                                                                                                                                                                                                                                                                                                                                                                 |
| IndiaGBRC173/2020      | EPI_ISL_467037 | GMERS Medical College and Hospital, Gandhinagar                                                | Gujarat Biotechnology Research Centre                                                                                                  | 2020-06-05 | Prithesh Sabara et al B                                                                                                                                                                                                                                                                                                                                                          |
| IndiaGBRC173/2020      | EPI_ISL_467038 | GMERS Medical College and Hospital, Gandhinagar                                                | Gujarat Biotechnology Research Centre                                                                                                  | 2020-06-05 | Apurvashankar Puvar et al B                                                                                                                                                                                                                                                                                                                                                      |
| IndiaGBRC174/2020      | EPI_ISL_467037 | GMERS Medical College and Hospital, Gandhinagar                                                | Gujarat Biotechnology Research Centre                                                                                                  | 2020-06-05 | Jamni Ravali et al                                                                                                                                                                                                                                                                                                                                                               |
| IndiaGBRC174/2020      | EPI_ISL_467038 | GMERS Medical College and Hospital, Gandhinagar                                                | Gujarat Biotechnology Research Centre                                                                                                  | 2020-06-05 | Zainab Patel et al                                                                                                                                                                                                                                                                                                                                                               |
| IndiaGBRC177/2020      | EPI_ISL_467042 | B.J. Medical College and Civil hospital                                                        | Gujarat Biotechnology Research Centre                                                                                                  | 2020-06-03 | Prithi Tivedi et al                                                                                                                                                                                                                                                                                                                                                              |
| IndiaGBRC178/2020      | EPI_ISL_467044 | B.J. Medical College and Civil hospital                                                        | Gujarat Biotechnology Research Centre                                                                                                  | 2020-06-03 | Nishi Patel et al                                                                                                                                                                                                                                                                                                                                                                |
| IndiaGBRC179/2020      | EPI_ISL_467045 | B.J. Medical College and Civil hospital                                                        | Gujarat Biotechnology Research Centre                                                                                                  | 2020-06-03 | Nishi Sawalija et al                                                                                                                                                                                                                                                                                                                                                             |
| IndiaGBRC179/2020      | EPI_ISL_467046 | B.J. Medical College and Civil hospital                                                        | Gujarat Biotechnology Research Centre                                                                                                  | 2020-06-03 | Raghavendra Kumar et al                                                                                                                                                                                                                                                                                                                                                          |
| IndiaGBRC180/2020      | EPI_ISL_467047 | B.J. Medical College and Civil hospital                                                        | Gujarat Biotechnology Research Centre                                                                                                  | 2020-06-03 | Raghavendra Kumar et al                                                                                                                                                                                                                                                                                                                                                          |
| IndiaGBRC181/2020      | EPI_ISL_467050 | B.J. Medical College and Civil hospital                                                        | Gujarat Biotechnology Research Centre                                                                                                  | 2020-06-03 | Dinesh Kumar et al                                                                                                                                                                                                                                                                                                                                                               |
| IndiaGBRC182/2020      | EPI_ISL_467052 | B.J. Medical College and Civil hospital                                                        | Gujarat Biotechnology Research Centre                                                                                                  | 2020-06-03 | Zuber Sajjad et al                                                                                                                                                                                                                                                                                                                                                               |
| IndiaGBRC183/2020      | EPI_ISL_467054 | B.J. Medical College and Civil hospital                                                        | Gujarat Biotechnology Research Centre                                                                                                  | 2020-06-03 | Lakshmi Pandya et al                                                                                                                                                                                                                                                                                                                                                             |
| IndiaGBRC185/2020      | EPI_ISL_469025 | B.J. Medical College and Civil hospital                                                        | Gujarat Biotechnology Research Centre                                                                                                  | 2020-06-03 | Prithi Tivedi et al                                                                                                                                                                                                                                                                                                                                                              |
| IndiaGBRC185/2020      | EPI_ISL_469026 | B.J. Medical College and Civil hospital                                                        | Gujarat Biotechnology Research Centre                                                                                                  | 2020-06-03 | Nishi Sawalija et al                                                                                                                                                                                                                                                                                                                                                             |
| IndiaGBRC185/2020      | EPI_ISL_469028 | B.J. Medical College and Civil hospital                                                        | Gujarat Biotechnology Research Centre                                                                                                  | 2020-06-03 | Raghavendra Kumar et al                                                                                                                                                                                                                                                                                                                                                          |
| IndiaGBRC186/2020      | EPI_ISL_469028 | B.J. Medical College and Civil hospital                                                        | Gujarat Biotechnology Research Centre                                                                                                  | 2020-06-03 | Dinesh Kumar et al                                                                                                                                                                                                                                                                                                                                                               |
| IndiaGBRC187/2020      | EPI_ISL_469029 | Government Medical College, Vadodra                                                            | Gujarat Biotechnology Research Centre                                                                                                  | 2020-06-05 | Zuber Sajjad et al                                                                                                                                                                                                                                                                                                                                                               |
| IndiaGBRC187/2020      | EPI_ISL_469030 | Government Medical College, Vadodra                                                            | Gujarat Biotechnology Research Centre                                                                                                  | 2020-06-05 | Lakshmi Pandya et al                                                                                                                                                                                                                                                                                                                                                             |
| IndiaGBRC19/2020       | EPI_ISL_437448 | B.J. Medical College and Civil hospital                                                        | Gujarat Biotechnology Research Centre                                                                                                  | 2020-04-26 | Neena Doshi et al                                                                                                                                                                                                                                                                                                                                                                |
| IndiaGBRC192/2020      | EPI_ISL_469036 | Government Medical College, Vadodra                                                            | Gujarat Biotechnology Research Centre                                                                                                  | 2020-06-05 | Dinesh Kumar et al                                                                                                                                                                                                                                                                                                                                                               |
| IndiaGBRC195a/2020     | EPI_ISL_469039 | GMERS Medical College & Hospital                                                               | Gujarat Biotechnology Research Centre                                                                                                  | 2020-06-08 | Lakshmi Pandya et al                                                                                                                                                                                                                                                                                                                                                             |
| IndiaGBRC195b/2020     | EPI_ISL_469040 | GMERS Medical College & Hospital                                                               | Gujarat Biotechnology Research Centre                                                                                                  | 2020-06-08 | Snehal Bagathania et al                                                                                                                                                                                                                                                                                                                                                          |
| IndiaGBRC197/2020      | EPI_ISL_469042 | GMERS Medical College & Hospital                                                               | Gujarat Biotechnology Research Centre                                                                                                  | 2020-06-08 | Neena Doshi et al                                                                                                                                                                                                                                                                                                                                                                |
| IndiaGBRC201a/2020     | EPI_ISL_469046 | Dr. N. D. Desai Medical College & Hospital                                                     | Gujarat Biotechnology Research Centre                                                                                                  | 2020-06-08 | Tejas Shah et al                                                                                                                                                                                                                                                                                                                                                                 |
| IndiaGBRC201b/2020     | EPI_ISL_469047 | Dr. N. D. Desai Medical College & Hospital                                                     | Gujarat Biotechnology Research Centre                                                                                                  | 2020-06-08 | Ankit Hirsu et al A                                                                                                                                                                                                                                                                                                                                                              |
| IndiaGBRC202/2020      | EPI_ISL_469048 | Banas Medical College and Research Institute                                                   | Gujarat Biotechnology Research Centre                                                                                                  | 2020-06-05 | Radhika Khara et al                                                                                                                                                                                                                                                                                                                                                              |
| IndiaGBRC24a/2020      | EPI_ISL_437453 | B.J. Medical College and Civil hospital                                                        | Gujarat Biotechnology Research Centre                                                                                                  | 2020-04-26 | Nishi Sood et al                                                                                                                                                                                                                                                                                                                                                                 |
| IndiaGBRC30/2020       | EPI_ISL_444461 | B.J. Medical College and Civil hospital                                                        | Gujarat Biotechnology Research Centre                                                                                                  | 2020-04-29 | ( <a href="https://www.biorxiv.org/content/10.1101/2020.05.28.122143v1">https://www.biorxiv.org/content/10.1101/2020.05.28.122143v1</a> )                                                                                                                                                                                                                                        |
| IndiaGBRC31/2020       | EPI_ISL_444462 | B.J. Medical College and Civil hospital                                                        | Gujarat Biotechnology Research Centre                                                                                                  | 2020-04-29 | ( <a href="https://www.biorxiv.org/content/10.1101/2020.05.28.122143v1">https://www.biorxiv.org/content/10.1101/2020.05.28.122143v1</a> )                                                                                                                                                                                                                                        |
| IndiaGBRC44/2020       | EPI_ISL_444475 | B.J. Medical College and Civil hospital                                                        | Gujarat Biotechnology Research Centre                                                                                                  | 2020-04-29 | ( <a href="https://www.biorxiv.org/content/10.1101/2020.05.28.122143v1">https://www.biorxiv.org/content/10.1101/2020.05.28.122143v1</a> )                                                                                                                                                                                                                                        |
| IndiaGBRC62/2020       | EPI_ISL_447037 | B.J. Medical College and Civil hospital                                                        | Gujarat Biotechnology Research Centre                                                                                                  | 2020-05-03 | ( <a href="https://www.biorxiv.org/content/10.1101/2020.05.28.122143v1">https://www.biorxiv.org/content/10.1101/2020.05.28.122143v1</a> )                                                                                                                                                                                                                                        |
| IndiaGBRC64/2020       | EPI_ISL_447039 | B.J. Medical College and Civil hospital                                                        | Gujarat Biotechnology Research Centre                                                                                                  | 2020-05-03 | ( <a href="https://www.biorxiv.org/content/10.1101/2020.05.28.122143v1">https://www.biorxiv.org/content/10.1101/2020.05.28.122143v1</a> )                                                                                                                                                                                                                                        |
| IndiaGBRC82a/2020      | EPI_ISL_447542 | Gujarat Biotechnology Research Centre                                                          | Gujarat Biotechnology Research Centre                                                                                                  | 2020-05-05 | ( <a href="https://www.biorxiv.org/content/10.1101/2020.05.28.122143v1">https://www.biorxiv.org/content/10.1101/2020.05.28.122143v1</a> )                                                                                                                                                                                                                                        |
| IndiaGBRC83/2020       | EPI_ISL_447544 | Gujarat Biotechnology Research Centre                                                          | Gujarat Biotechnology Research Centre                                                                                                  | 2020-05-05 | ( <a href="https://www.biorxiv.org/content/10.1101/2020.05.28.122143v1">https://www.biorxiv.org/content/10.1101/2020.05.28.122143v1</a> )                                                                                                                                                                                                                                        |
| IndiaGBRC85/2020       | EPI_ISL_447546 | Gujarat Biotechnology Research Centre                                                          | Gujarat Biotechnology Research Centre                                                                                                  | 2020-05-05 | ( <a href="https://www.biorxiv.org/content/10.1101/2020.05.28.122143v1">https://www.biorxiv.org/content/10.1101/2020.05.28.122143v1</a> )                                                                                                                                                                                                                                        |
| IndiaGMC-KP1125/2020   | EPI_ISL_437626 | Department of Microbiology, Gandhi Medical College and Hospital                                | Gujarat Biotechnology Research Centre                                                                                                  | 2020-03-24 | Kalyani Putty et al ( <a href="https://www.biorxiv.org/content/10.1101/2020.05.28.122143v1">https://www.biorxiv.org/content/10.1101/2020.05.28.122143v1</a> )                                                                                                                                                                                                                    |
| IndiaGMC-RK100/2020    | EPI_ISL_431101 | Department of Microbiology, Gandhi Medical College and Hospital                                | Department of Veterinary Biotechnology, College of Veterinary Science, Rajendranagar, PV Narasimha Rao Telangana Veterinary University | 2020-      |                                                                                                                                                                                                                                                                                                                                                                                  |

|                             |                |                                                                                                            |                                                                                                                          |            |                                                                                                                                                                     |
|-----------------------------|----------------|------------------------------------------------------------------------------------------------------------|--------------------------------------------------------------------------------------------------------------------------|------------|---------------------------------------------------------------------------------------------------------------------------------------------------------------------|
| India/NCDC-02322/2020       | EPI_ISL_435082 | National Centre for Disease Control (NCDC), CSIR-Institute of Genomics and Integrative Biology (CSIR-IGIB) | NCDC/CSIR-IGIB                                                                                                           | 2020-03-29 | Pramod Kumar et al ( <a href="https://doi.org/10.1101/2020.06.04.128751">https://doi.org/10.1101/2020.06.04.128751</a> )                                            |
| India/NCDC-02328/2020       | EPI_ISL_435096 | National Centre for Disease Control (NCDC), CSIR-Institute of Genomics and Integrative Biology (CSIR-IGIB) | NCDC/CSIR-IGIB                                                                                                           | 2020-03-29 | Pramod Kumar et al ( <a href="https://doi.org/10.1101/2020.06.04.128751">https://doi.org/10.1101/2020.06.04.128751</a> )                                            |
| India/NCDC-02336/2020       | EPI_ISL_435088 | National Centre for Disease Control (NCDC), CSIR-Institute of Genomics and Integrative Biology (CSIR-IGIB) | NCDC/CSIR-IGIB                                                                                                           | 2020-03-29 | Pramod Kumar et al ( <a href="https://doi.org/10.1101/2020.06.04.128751">https://doi.org/10.1101/2020.06.04.128751</a> )                                            |
| India/NCDC-02370/2020       | EPI_ISL_435107 | National Centre for Disease Control (NCDC), CSIR-Institute of Genomics and Integrative Biology (CSIR-IGIB) | NCDC/CSIR-IGIB                                                                                                           | 2020-03-29 | Pramod Kumar et al ( <a href="https://doi.org/10.1101/2020.06.04.128751">https://doi.org/10.1101/2020.06.04.128751</a> )                                            |
| India/NCDC-02415/2020       | EPI_ISL_435111 | National Centre for Disease Control (NCDC), CSIR-Institute of Genomics and Integrative Biology (CSIR-IGIB) | NCDC/CSIR-IGIB                                                                                                           | 2020-03-30 | Pramod Kumar et al ( <a href="https://doi.org/10.1101/2020.06.04.128751">https://doi.org/10.1101/2020.06.04.128751</a> )                                            |
| India/NCDC-2443/2020        | EPI_ISL_436413 | National Centre for Disease Control (NCDC)                                                                 | NCDC/CSIR-IGIB                                                                                                           | 2020-03-30 | Pramod Kumar et al ( <a href="https://doi.org/10.1101/2020.06.04.128751">https://doi.org/10.1101/2020.06.04.128751</a> )                                            |
| India/NCDC-2514/2020        | EPI_ISL_436416 | National Centre for Disease Control (NCDC)                                                                 | NCDC/CSIR-IGIB                                                                                                           | 2020-03-31 | Pramod Kumar et al ( <a href="https://doi.org/10.1101/2020.06.04.128751">https://doi.org/10.1101/2020.06.04.128751</a> )                                            |
| India/NCDC-2517/2020        | EPI_ISL_436418 | National Centre for Disease Control (NCDC)                                                                 | NCDC/CSIR-IGIB                                                                                                           | 2020-03-31 | Pramod Kumar et al ( <a href="https://doi.org/10.1101/2020.06.04.128751">https://doi.org/10.1101/2020.06.04.128751</a> )                                            |
| India/NCDC-2535/2020        | EPI_ISL_436422 | National Centre for Disease Control (NCDC)                                                                 | NCDC/CSIR-IGIB                                                                                                           | 2020-03-31 | Pramod Kumar et al ( <a href="https://doi.org/10.1101/2020.06.04.128751">https://doi.org/10.1101/2020.06.04.128751</a> )                                            |
| India/NCDC-3175/2020        | EPI_ISL_436426 | National Centre for Disease Control (NCDC)                                                                 | NCDC/CSIR-IGIB                                                                                                           | 2020-04-05 | Pramod Kumar et al ( <a href="https://doi.org/10.1101/2020.06.04.128751">https://doi.org/10.1101/2020.06.04.128751</a> )                                            |
| India/NCDC-3230/2020        | EPI_ISL_436431 | National Centre for Disease Control (NCDC)                                                                 | NCDC/CSIR-IGIB                                                                                                           | 2020-04-05 | Pramod Kumar et al ( <a href="https://doi.org/10.1101/2020.06.04.128751">https://doi.org/10.1101/2020.06.04.128751</a> )                                            |
| India/NCDC-3835/2020        | EPI_ISL_436438 | National Centre for Disease Control (NCDC)                                                                 | NCDC/CSIR-IGIB                                                                                                           | 2020-04-07 | Pramod Kumar et al ( <a href="https://doi.org/10.1101/2020.06.04.128751">https://doi.org/10.1101/2020.06.04.128751</a> )                                            |
| India/NGC-CDFD-03/2020      | EPI_ISL_466841 | National Genomics Core-Center for DNA Fingerprinting and Diagnostics                                       | NCDC/CSIR-IGIB                                                                                                           | 2020-05-10 | Bala Pratyusha et al                                                                                                                                                |
| India/NGC-CDFD-12/2020      | EPI_ISL_466850 | National Genomics Core-Center for DNA Fingerprinting and Diagnostics                                       | National Genomics Core-Center for DNA Fingerprinting and Diagnostics (NGC-CDFD), DBT's PAN-INDIA-1000 Genome Consortium  | 2020-05-26 | Bala Pratyusha et al                                                                                                                                                |
| India/NGC-CDFD-13/2020      | EPI_ISL_466851 | National Genomics Core-Center for DNA Fingerprinting and Diagnostics                                       | National Genomics Core-Center for DNA Fingerprinting and Diagnostics (NGC-CDFD), DBT's PAN-INDIA-1000 Genome Consortium  | 2020-05-27 | Bala Pratyusha et al                                                                                                                                                |
| India/NGC-CDFD-21/2020      | EPI_ISL_466859 | National Genomics Core-Center for DNA Fingerprinting and Diagnostics                                       | National Genomics Core-Center for DNA Fingerprinting and Diagnostics (NGC-CDFD), DBT's PAN-INDIA-1000 Genome Consortium  | 2020-05-29 | Bala Pratyusha et al                                                                                                                                                |
| India/NHISAD-2904-107/2020  | EPI_ISL_452791 | ICAR-National Institute of High Security Animal Diseases                                                   | ICAR-National Institute of High Security Animal Diseases                                                                 | 2020-04-27 | Anamika Mishra et al                                                                                                                                                |
| India/hmh-1071/2020         | EPI_ISL_426487 | District Surveillance Unit                                                                                 | Department of Neurology, National Institute of Mental Health and Neuroscience (NIMHANS)                                  | 2020-04-14 | Chitra Prathibhanan et al ( <a href="https://www.biorxiv.org/content/10.1101/2020.08.28.122143v1">https://www.biorxiv.org/content/10.1101/2020.08.28.122143v1</a> ) |
| India/hmh-1588/2020         | EPI_ISL_436157 | District Surveillance Unit                                                                                 | Department of Neurology, National Institute of Mental Health and Neuroscience (NIMHANS)                                  | 2020-04-17 | Chitra Prathibhanan et al ( <a href="https://www.biorxiv.org/content/10.1101/2020.08.28.122143v1">https://www.biorxiv.org/content/10.1101/2020.08.28.122143v1</a> ) |
| India/NIV-11855/2020        | EPI_ISL_452198 | NIV Influenza                                                                                              | NIV Influenza                                                                                                            | 2020-04-20 | Potdar V et al B                                                                                                                                                    |
| India/NIV-12067/2020        | EPI_ISL_452201 | NIV Influenza                                                                                              | NIV Influenza                                                                                                            | 2020-04-20 | Potdar V et al B                                                                                                                                                    |
| India/NIV-2810/2020         | EPI_ISL_452202 | NIV Influenza                                                                                              | NIV Influenza                                                                                                            | 2020-03-16 | Potdar V et al B                                                                                                                                                    |
| India/NIV-GA-710/2020       | EPI_ISL_454566 | NIV Influenza                                                                                              | NIV Influenza                                                                                                            | 2020-03-31 | Potdar V et al B                                                                                                                                                    |
| India/NIV-QC-796/2020       | EPI_ISL_454567 | NIV Influenza                                                                                              | NIV Influenza                                                                                                            | 2020-04-22 | Potdar V et al B                                                                                                                                                    |
| India/RMRC23/2020           | EPI_ISL_455774 | REGIONAL VRDL/ICMR-RMRC BBSR                                                                               | Immunogenomics lab, Institute of Life Sciences, Bhubaneswar                                                              | 2020-04-04 | Sunil Raghav et al                                                                                                                                                  |
| India/RMRC24/2020           | EPI_ISL_455775 | REGIONAL VRDL/ICMR-RMRC BBSR                                                                               | Immunogenomics lab, Institute of Life Sciences, Bhubaneswar                                                              | 2020-04-04 | Sunil Raghav et al                                                                                                                                                  |
| India/RMRC30/2020           | EPI_ISL_455778 | REGIONAL VRDL/ICMR-RMRC BBSR                                                                               | Immunogenomics lab, Institute of Life Sciences, Bhubaneswar                                                              | 2020-04-04 | Sunil Raghav et al                                                                                                                                                  |
| India/RMRC6/2020            | EPI_ISL_455783 | REGIONAL VRDL/ICMR-RMRC BBSR                                                                               | Immunogenomics lab, Institute of Life Sciences, Bhubaneswar                                                              | 2020-04-02 | Sunil Raghav et al                                                                                                                                                  |
| India/RMRC7/2020            | EPI_ISL_455784 | REGIONAL VRDL/ICMR-RMRC BBSR                                                                               | Immunogenomics lab, Institute of Life Sciences, Bhubaneswar                                                              | 2020-04-02 | Sunil Raghav et al                                                                                                                                                  |
| India/S31/2020              | EPI_ISL_455660 | ICMR-National Institute of Cholera and Enteric Diseases                                                    | National Institute of Biomedical Genomics                                                                                | 2020-05-01 | Arimadam Maitra et al                                                                                                                                               |
| India/S4/2020               | EPI_ISL_455640 | ICMR-National Institute of Cholera and Enteric Diseases                                                    | National Institute of Biomedical Genomics                                                                                | 2020-03-27 | Arimadam Maitra et al                                                                                                                                               |
| India/S48/2020              | EPI_ISL_455668 | ICMR-National Institute of Cholera and Enteric Diseases                                                    | National Institute of Biomedical Genomics                                                                                | 2020-05-05 | Arimadam Maitra et al                                                                                                                                               |
| India/S49/2020              | EPI_ISL_455669 | ICMR-National Institute of Cholera and Enteric Diseases                                                    | National Institute of Biomedical Genomics                                                                                | 2020-05-03 | Arimadam Maitra et al                                                                                                                                               |
| India/S50/2020              | EPI_ISL_455670 | ICMR-National Institute of Cholera and Enteric Diseases                                                    | National Institute of Biomedical Genomics                                                                                | 2020-05-03 | Arimadam Maitra et al                                                                                                                                               |
| India/SMSCOV161/2020        | EPI_ISL_454832 | SMS Medical College, Jaipur                                                                                | CSIR Institute of Genomics and Integrative Biology                                                                       | 2020-04-21 | Sudhir Bhandari et al                                                                                                                                               |
| India/THSTI-BAL_42/2020     | EPI_ISL_454860 | Translational Health Science and Technology Institute -ESIC medical college and hospital, Faridabad        | THSTI Biossaying Laboratory                                                                                              | 2020-04-07 | Saurabh Kumar et al                                                                                                                                                 |
| Indonesia/EJ-ITD1238Sp/2020 | EPI_ISL_458079 | Mitra Kelarga Pasuruan Kenjeran                                                                            | Institute of Tropical Disease, Universitas Airlangga                                                                     | 2020-03-30 | Aldies M Nastiti et al                                                                                                                                              |
| Indonesia/EJ-ITD1273NT/2020 | EPI_ISL_458081 | RSUD Bangli Pasuruan                                                                                       | Institute of Tropical Disease, Universitas Airlangga                                                                     | 2020-03-30 | Jozzy R Dewantari et al                                                                                                                                             |
| Indonesia/EJ-ITD3101NT/2020 | EPI_ISL_458083 | Adi Husada Undaan Hospital                                                                                 | Institute of Tropical Disease, Universitas Airlangga                                                                     | 2020-04-11 | Rima R Prasetya et al                                                                                                                                               |
| Indonesia/EJ-ITD3590NT/2020 | EPI_ISL_437188 | RSUD Dr. Soetomo                                                                                           | Institute of Tropical Disease, Universitas Airlangga                                                                     | 2020-04-14 | Krisnadi Rahardjo et al                                                                                                                                             |
| Indonesia/EJ-ITD853Sp/2020  | EPI_ISL_437187 | Siloam Hospitals                                                                                           | Institute of Tropical Disease, Universitas Airlangga                                                                     | 2020-03-25 | Kazufumi Shimizu et al                                                                                                                                              |
| Indonesia/JKT-EUK01/2020    | EPI_ISL_437189 | Pusat Pertamina Hospital                                                                                   | Eijkman Institute for Molecular Biology, Ministry of Research and Technology/National Agency for Research and Innovation | 2020-03-26 | Edison Johar et al                                                                                                                                                  |
| Indonesia/JKT-EUK0141/2020  | EPI_ISL_435291 | Medisza Hospital Jakarta                                                                                   | Eijkman Institute for Molecular Biology, Ministry of Research and Technology/National Agency for Research and Innovation | 2020-03-17 | Edison Johar et al                                                                                                                                                  |
| Indonesia/JKT-EUK02/2020    | EPI_ISL_437190 | RS Pondok Indah Hospital - Pondok Indah                                                                    | Eijkman Institute for Molecular Biology, Ministry of Research and Technology/National Agency for Research and Innovation | 2020-03-26 | Edison Johar et al                                                                                                                                                  |
| Indonesia/JKT-EUK03/2020    | EPI_ISL_437191 | RS Pondok Indah Hospital - Pondok Indah                                                                    | Eijkman Institute for Molecular Biology, Ministry of Research and Technology/National Agency for Research and Innovation | 2020-03-27 | Edison Johar et al                                                                                                                                                  |
| Indonesia/JKT-EUK0317/2020  | EPI_ISL_435282 | RS Pondok Indah Hospital - Pondok Indah                                                                    | Eijkman Institute for Molecular Biology, Ministry of Research and Technology/National Agency for Research and Innovation | 2020-03-19 | Edison Johar et al                                                                                                                                                  |
| Indonesia/JKT-EUK04/2020    | EPI_ISL_437192 | Mitra Kelarga Kelapa Gading Hospital                                                                       | Eijkman Institute for Molecular Biology, Ministry of Research and Technology/National Agency for Research and Innovation | 2020-04-01 | Edison Johar et al                                                                                                                                                  |
| Indonesia/JKT-EUK07/2020    | EPI_ISL_467376 | RSUP Fatmawati                                                                                             | Eijkman Institute for Molecular Biology, Ministry of Research and Technology/National Agency for Research and Innovation | 2020-04-24 | Edison Johar et al                                                                                                                                                  |
| Indonesia/JKT-EUK0444/2020  | EPI_ISL_435283 | RS Pondok Indah Hospital - Pondok Indah                                                                    | Eijkman Institute for Molecular Biology, Ministry of Research and Technology/National Agency for Research and Innovation | 2020-03-30 | Edison Johar et al                                                                                                                                                  |
| Indonesia/MND-EUK06/2020    | EPI_ISL_467375 | RSUP Prof. Dr. R. Kandou Manado                                                                            | Eijkman Institute for Molecular Biology, Ministry of Research and Technology/National Agency for Research and Innovation | 2020-03-23 | Edison Johar et al                                                                                                                                                  |
| Indonesia/SMR-EUK05/2020    | EPI_ISL_467374 | Dinkes Samarinda                                                                                           | Eijkman Institute for Molecular Biology, Ministry of Research and Technology/National Agency for Research and Innovation | 2020-03-18 | Edison Johar et al                                                                                                                                                  |
| Iran/HGRC-01-IP1-8206/2020  | EPI_ISL_424349 |                                                                                                            | Human Genetic Research Center                                                                                            | 2020-03-09 | Zehrai et al                                                                                                                                                        |
| Iran/HGRC-2-2162/2020       | EPI_ISL_437512 |                                                                                                            | Human Genetic Research Center                                                                                            | 2020-03-26 | Khosravi et al                                                                                                                                                      |
| Iran/HGRC-1-1P1-8206/2020   | EPI_ISL_442523 | Pasteur Institute of Iran                                                                                  | Kawasar Human Genetic Research Company                                                                                   | 2020-03-09 | Sirus Zeriali et al                                                                                                                                                 |
| Iran/HGRC-2-2162/2020       | EPI_ISL_442044 | Kawasar Human Genetic Research Center                                                                      | Kawasar Human Genetic Research Center                                                                                    | 2020-03-26 | Mohammad Ali Khosravi et al                                                                                                                                         |
| Iran/HGRC-3-2178/2020       | EPI_ISL_445088 |                                                                                                            | Human Genetic Research Center                                                                                            | 2020-03-26 | Abbasipour Bashash et al                                                                                                                                            |
| Ireland/21023/2020          | EPI_ISL_418516 | UCD National Virus Reference Laboratory                                                                    | UCD National Virus Reference Laboratory                                                                                  | 2020-03-06 | Michael Carr et al                                                                                                                                                  |
| Ireland/21145/2020          | EPI_ISL_418548 | UCD National Virus Reference Laboratory                                                                    | UCD National Virus Reference Laboratory                                                                                  | 2020-03-06 | Michael Carr et al                                                                                                                                                  |
| Ireland/24052/2020          | EPI_ISL_418584 | UCD National Virus Reference Laboratory                                                                    | UCD National Virus Reference Laboratory                                                                                  | 2020-03-10 | Michael Carr et al                                                                                                                                                  |
| Ireland/Cork/2020           | EPI_ISL_417432 | UCD National Virus Reference Laboratory                                                                    | Public Health Wales Microbiology Cardiff                                                                                 | 2020-03-08 | Catherine Dempsey et al                                                                                                                                             |
| Ireland/Dublin-19072/2020   | EPI_ISL_414584 | UCD National Virus Reference Laboratory                                                                    | UCD National Virus Reference Laboratory                                                                                  | 2020-03-02 | Michael Carr et al                                                                                                                                                  |
| Ireland/Dublin-22361/2020   | EPI_ISL_418580 | UCD National Virus Reference Laboratory                                                                    | UCD National Virus Reference Laboratory                                                                                  | 2020-03-08 | Michael Carr et al                                                                                                                                                  |
| Ireland/Dublin-22428/2020   | EPI_ISL_418581 | UCD National Virus Reference Laboratory                                                                    | UCD National Virus Reference Laboratory                                                                                  | 2020-03-08 | Michael Carr et al                                                                                                                                                  |
| Ireland/Limerick-19933/2020 | EPI_ISL_414585 | UCD National Virus Reference Laboratory                                                                    | UCD National Virus Reference Laboratory                                                                                  | 2020-03-03 | Michael Carr et al                                                                                                                                                  |
| Ireland/Limerick-19934/2020 | EPI_ISL_414586 | UCD National Virus Reference Laboratory                                                                    | UCD National Virus Reference Laboratory                                                                                  | 2020-03-03 | Michael Carr et al                                                                                                                                                  |
| Ireland/Limerick-19935/2020 | EPI_ISL_414587 | UCD National Virus Reference Laboratory                                                                    | UCD National Virus Reference Laboratory                                                                                  | 2020-03-03 | Michael Carr et al                                                                                                                                                  |
| Israel/130710067/2020       | EPI_ISL_447468 | Clinical Microbiology Laboratory, Sheba Medical Center                                                     | Stern Lab                                                                                                                | 2020-04-14 | Stern Lab et al ( <a href="https://doi.org/10.1101/2020.05.21.20104521">https://doi.org/10.1101/2020.05.21.20104521</a> )                                           |
| Israel/130710217/2020       | EPI_ISL_447462 | Clinical Microbiology Laboratory, Sheba Medical Center                                                     | Stern Lab                                                                                                                | 2020-04-16 | Stern Lab et al ( <a href="https://doi.org/10.1101/2020.05.21.20104521">https://doi.org/10.1101/2020.05.21.20104521</a> )                                           |
| Israel/130710390/2020       | EPI_ISL_447461 | Clinical Microbiology Laboratory, Sheba Medical Center                                                     | Stern Lab                                                                                                                | 2020-04-17 | Stern Lab et al ( <a href="https://doi.org/10.1101/2020.05.21.20104521">https://doi.org/10.1101/2020.05.21.20104521</a> )                                           |
| Israel/130711082/2020       | EPI_ISL_447456 | Clinical Microbiology Laboratory, Sheba Medical Center                                                     | Stern Lab                                                                                                                | 2020-04-20 | Stern Lab et al ( <a href="https://doi.org/10.1101/2020.05.21.20104521">https://doi.org/10.1101/2020.05.21.20104521</a> )                                           |
| Israel/130711367/2020       | EPI_ISL_447452 | Clinical Microbiology Laboratory, Sheba Medical Center                                                     | Stern Lab                                                                                                                | 2020-04-22 | Stern Lab et al ( <a href="https://doi.org/10.1101/2020.05.21.20104521">https://doi.org/10.1101/2020.05.21.20104521</a> )                                           |
| Israel/13075703/2020        | EPI_ISL_447450 | Clinical Microbiology Laboratory, Sheba Medical Center                                                     | Stern Lab                                                                                                                | 2020-03-29 | Stern Lab et al ( <a href="https://doi.org/10.1101/2020.05.21.20104521">https://doi.org/10.1101/2020.05.21.20104521</a> )                                           |
| Israel/13075782/2020        | EPI_ISL_447447 | Clinical Microbiology Laboratory, Sheba Medical Center                                                     | Stern Lab                                                                                                                | 2020-03-30 | Stern Lab et al ( <a href="https://doi.org/10.1101/2020.05.21.20104521">https://doi.org/10.1101/2020.05.21.20104521</a> )                                           |
| Israel/13075798/2020        | EPI_ISL_447446 | Clinical Microbiology Laboratory, Sheba Medical Center                                                     | Stern Lab                                                                                                                | 2020-03-30 | Stern Lab et al ( <a href="https://doi.org/10.1101/2020.05.21.20104521">https://doi.org/10.1101/2020.05.21.20104521</a> )                                           |
| Israel/13075790/2020        | EPI_ISL_447445 | Clinical Microbiology Laboratory, Sheba Medical Center                                                     | Stern Lab                                                                                                                | 2020-03-30 | Stern Lab et al ( <a href="https://doi.org/10.1101/2020.05.21.20104521">https://doi.org/10.1101/2020.05.21.20104521</a> )                                           |
| Israel/13075882/2020        | EPI_ISL_447442 | Clinical Microbiology Laboratory, Sheba Medical Center                                                     | Stern Lab                                                                                                                | 2020-03-30 | Stern Lab et al ( <a href="https://doi.org/10.1101/2020.05.21.20104521">https://doi.org/10.1101/2020.05.21.20104521</a> )                                           |
| Israel/13077377/2020        | EPI_ISL_447440 | Clinical Microbiology Laboratory, Sheba Medical Center                                                     | Stern Lab                                                                                                                | 2020-04-02 | Stern Lab et al ( <a href="https://doi.org/10.1101/2020.05.21.20104521">https://doi.org/10.1101/2020.05.21.20104521</a> )                                           |
| Israel/13077511/2020        | EPI_ISL_447433 | Clinical Microbiology Laboratory, Sheba Medical Center                                                     | Stern Lab                                                                                                                | 2020-04-03 | Stern Lab et al ( <a href="https://doi.org/10.1101/2020.05.21.20104521">https://doi.org/10.1101/2020.05.21.20104521</a> )                                           |
| Israel/13077726/2020        | EPI_ISL_447426 | Clinical Microbiology Laboratory, Sheba Medical Center                                                     | Stern Lab                                                                                                                | 2020-04-03 | Stern Lab et al ( <a href="https://doi.org/10.1101/2020.05.21.20104521">https://doi.org/10.1101/2020.05.21.20104521</a> )                                           |
| Israel/13077846/2020        | EPI_ISL_447422 | Clinical Microbiology Laboratory, Sheba Medical Center                                                     | Stern Lab                                                                                                                | 2020-04-04 | Stern Lab et al ( <a href="https://doi.org/10.1101/2020.05.21.20104521">https://doi.org/10.1101/2020.05.21.20104521</a> )                                           |
| Israel/13077847/2020        | EPI_ISL_447421 | Clinical Microbiology Laboratory, Sheba Medical Center                                                     | Stern Lab                                                                                                                | 2020-04-04 | Stern Lab et al ( <a href="https://doi.org/10.1101/2020.05.21.20104521">https://doi.org/10.1101/2020.05.21.20104521</a> )                                           |
| Israel/13077882/2020        | EPI_ISL_447419 | Clinical Microbiology Laboratory, Sheba Medical Center                                                     | Stern Lab                                                                                                                | 2020-04-04 | Stern Lab et al ( <a href="https://doi.org/10.1101/2020.05.21.20104521">https://doi.org/10.1101/2020.05.21.20104521</a> )                                           |
| Israel/2020063/2020         | EPI_ISL_447414 | Clinical Virology Unit, Hadassah Hebrew University Medical Center                                          | Stern Lab                                                                                                                | 2020-03-17 | Stern Lab et al ( <a href="https://doi.org/10.1101/2020.05.21.20104521">https://doi.org/10.1101/2020.05.21.20104521</a> )                                           |
| Israel/2020068/2020         | EPI_ISL_447413 | Clinical Virology Unit, Hadassah Hebrew University Medical Center                                          | Stern Lab                                                                                                                | 2020-03-17 | Stern Lab et al ( <a href="https://doi.org/10.1101/2020.05.21.20104521">https://doi.org/10.1101/2020.05.21.20104521</a> )                                           |
| Israel/2020069/2020         | EPI_ISL_447412 | Clinical Virology Unit, Hadassah Hebrew University Medical Center                                          | Stern Lab                                                                                                                | 2020-03-17 | Stern Lab et al ( <a href="https://doi.org/10.1101/2020.05.21.20104521">https://doi.org/10.1101/2020.05.21.20104521</a> )                                           |
| Israel/2020084/2020         | EPI_ISL_447410 | Clinical Virology Unit, Hadassah Hebrew University Medical Center                                          | Stern Lab                                                                                                                | 2020-03-17 | Stern Lab et al ( <a href="https://doi.org/10.1101/2020.05.21.20104521">https://doi.org/10.1101/2020.05.21.20104521</a> )                                           |
| Israel/2023620/2020         | EPI_ISL_447408 | Clinical Microbiology Laboratory, The Baruch Padeh Medical Center, Poriya                                  | Stern Lab                                                                                                                | 2020-03-17 | Stern Lab et al ( <a href="https://doi.org/10.1101/2020.05.21.20104521">https://doi.org/10.1101/2020.05.21.20104521</a> )                                           |
| Israel/2046171/2020         | EPI_ISL_447405 | Clinical Microbiology Laboratory, The Baruch Padeh Medical Center, Poriya                                  | Stern Lab                                                                                                                | 2020-03-31 | Stern Lab et al ( <a href="https://doi.org/10.1101/2020.05.21.20104521">https://doi.org/10.1101/2020.05.21.20104521</a> )                                           |
| Israel/2047016/2020         | EPI_ISL_447397 | Clinical Microbiology Laboratory, The Baruch Padeh Medical Center, Poriya                                  | Stern Lab                                                                                                                | 2020-03-26 | Stern Lab et al ( <a href="https://doi.org/10.1101/2020.05.21.20104521">https://doi.org/10.1101/2020.05.21.20104521</a> )                                           |
| Israel/2047364/2020         | EPI_ISL_447393 | Clinical Microbiology Laboratory, The Baruch Padeh Medical Center, Poriya                                  | Stern Lab                                                                                                                | 2020-03-28 | Stern Lab et al ( <a href="https://doi.org/10.1101/2020.05.21.20104521">https://doi.org/10.1101/2020.05.21.20104521</a> )                                           |
| Israel/2047392/2020         | EPI_ISL_447392 | Clinical Microbiology Laboratory, The Baruch Padeh Medical Center, Poriya                                  | Stern Lab                                                                                                                | 2020-03-29 | Stern Lab et al ( <a href="https://doi.org/10.1101/2020.05.21.20104521">https://doi.org/10.1101/2020.05.21.20104521</a> )                                           |
| Israel/2047586/2020         | EPI_ISL_447389 | Clinical Microbiology Laboratory, The Baruch Padeh Medical Center, Poriya                                  | Stern Lab                                                                                                                | 2020-03-29 | Stern Lab et al ( <a href="https://doi.org/10.1101/2020.05.21.20104521">https://doi.org/10.1101/2020.05.21.20104521</a> )                                           |
| Israel/2047604/2020         | EPI_ISL_447388 | Clinical Microbiology Laboratory, The Baruch Padeh Medical Center, Poriya                                  | Stern Lab                                                                                                                | 2020-03-29 | Stern Lab et al ( <a href="https://doi.org/10.1101/2020.05.21.20104521">https://doi.org/10.1101/2020.05.21.20104521</a> )                                           |
| Israel/2047772/2020         | EPI_ISL_447385 | Clinical Microbiology Laboratory, The Baruch Padeh Medical Center, Poriya                                  |                                                                                                                          |            |                                                                                                                                                                     |



|                                  |                |                                                                                                                                                                                                                                                                                    |                                                                                                                        |            |                                                                                                                                                          |
|----------------------------------|----------------|------------------------------------------------------------------------------------------------------------------------------------------------------------------------------------------------------------------------------------------------------------------------------------|------------------------------------------------------------------------------------------------------------------------|------------|----------------------------------------------------------------------------------------------------------------------------------------------------------|
| Israel/2113601/2020              | EPI_ISL_447342 | Clinical Virology Unit, Hadassah Hebrew University Medical Center                                                                                                                                                                                                                  | Stem Lab                                                                                                               | 2020-04-15 | Stern Lab et al ( <a href="https://doi.org/10.1101/2020.05.21.20104521">https://doi.org/10.1101/2020.05.21.20104521</a> )                                |
| Israel/2113678/2020              | EPI_ISL_447340 | Clinical Virology Unit, Hadassah Hebrew University Medical Center                                                                                                                                                                                                                  | Stem Lab                                                                                                               | 2020-04-15 | Stern Lab et al ( <a href="https://doi.org/10.1101/2020.05.21.20104521">https://doi.org/10.1101/2020.05.21.20104521</a> )                                |
| Israel/51145198/2020             | EPI_ISL_447317 | Clinical Virology Laboratory, Soroka Medical Center and the Faculty of Health Sciences, Ben-Gurion University of the Negev                                                                                                                                                         | Stem Lab                                                                                                               | 2020-04-01 | Stern Lab et al ( <a href="https://doi.org/10.1101/2020.05.21.20104521">https://doi.org/10.1101/2020.05.21.20104521</a> )                                |
| Israel/51145482/2020             | EPI_ISL_447316 | Clinical Virology Laboratory, Soroka Medical Center and the Faculty of Health Sciences, Ben-Gurion University of the Negev                                                                                                                                                         | Stem Lab                                                                                                               | 2020-04-05 | Stern Lab et al ( <a href="https://doi.org/10.1101/2020.05.21.20104521">https://doi.org/10.1101/2020.05.21.20104521</a> )                                |
| Israel/701002317/2020            | EPI_ISL_447308 | Microbiology Division, Barzilai University Medical Center                                                                                                                                                                                                                          | Stem Lab                                                                                                               | 2020-03-21 | Stern Lab et al ( <a href="https://doi.org/10.1101/2020.05.21.20104521">https://doi.org/10.1101/2020.05.21.20104521</a> )                                |
| Israel/701002431/2020            | EPI_ISL_447302 | Microbiology Division, Barzilai University Medical Center                                                                                                                                                                                                                          | Stem Lab                                                                                                               | 2020-03-24 | Stern Lab et al ( <a href="https://doi.org/10.1101/2020.05.21.20104521">https://doi.org/10.1101/2020.05.21.20104521</a> )                                |
| Israel/701002462/2020            | EPI_ISL_447296 | Microbiology Division, Barzilai University Medical Center                                                                                                                                                                                                                          | Stem Lab                                                                                                               | 2020-03-24 | Stern Lab et al ( <a href="https://doi.org/10.1101/2020.05.21.20104521">https://doi.org/10.1101/2020.05.21.20104521</a> )                                |
| Israel/701002555/2020            | EPI_ISL_447290 | Microbiology Division, Barzilai University Medical Center                                                                                                                                                                                                                          | Stem Lab                                                                                                               | 2020-03-26 | Stern Lab et al ( <a href="https://doi.org/10.1101/2020.05.21.20104521">https://doi.org/10.1101/2020.05.21.20104521</a> )                                |
| Israel/701002556/2020            | EPI_ISL_447289 | Microbiology Division, Barzilai University Medical Center                                                                                                                                                                                                                          | Stem Lab                                                                                                               | 2020-03-26 | Stern Lab et al ( <a href="https://doi.org/10.1101/2020.05.21.20104521">https://doi.org/10.1101/2020.05.21.20104521</a> )                                |
| Israel/701002561/2020            | EPI_ISL_447288 | Microbiology Division, Barzilai University Medical Center                                                                                                                                                                                                                          | Stem Lab                                                                                                               | 2020-03-26 | Stern Lab et al ( <a href="https://doi.org/10.1101/2020.05.21.20104521">https://doi.org/10.1101/2020.05.21.20104521</a> )                                |
| Israel/701002768/2020            | EPI_ISL_447283 | Microbiology Division, Barzilai University Medical Center                                                                                                                                                                                                                          | Stem Lab                                                                                                               | 2020-03-28 | Stern Lab et al ( <a href="https://doi.org/10.1101/2020.05.21.20104521">https://doi.org/10.1101/2020.05.21.20104521</a> )                                |
| Israel/701002792/2020            | EPI_ISL_447281 | Microbiology Division, Barzilai University Medical Center                                                                                                                                                                                                                          | Stem Lab                                                                                                               | 2020-03-29 | Stern Lab et al ( <a href="https://doi.org/10.1101/2020.05.21.20104521">https://doi.org/10.1101/2020.05.21.20104521</a> )                                |
| Israel/990055204/2020            | EPI_ISL_447278 | Microbiology laboratory, Assuta Ashdod University-Affiliated Hospital                                                                                                                                                                                                              | Stem Lab                                                                                                               | 2020-03-25 | Stern Lab et al ( <a href="https://doi.org/10.1101/2020.05.21.20104521">https://doi.org/10.1101/2020.05.21.20104521</a> )                                |
| Israel/990055217/2020            | EPI_ISL_447277 | Microbiology laboratory, Assuta Ashdod University-Affiliated Hospital                                                                                                                                                                                                              | Stem Lab                                                                                                               | 2020-03-25 | Stern Lab et al ( <a href="https://doi.org/10.1101/2020.05.21.20104521">https://doi.org/10.1101/2020.05.21.20104521</a> )                                |
| Israel/990055237/2020            | EPI_ISL_447272 | Microbiology laboratory, Assuta Ashdod University-Affiliated Hospital                                                                                                                                                                                                              | Stem Lab                                                                                                               | 2020-03-25 | Stern Lab et al ( <a href="https://doi.org/10.1101/2020.05.21.20104521">https://doi.org/10.1101/2020.05.21.20104521</a> )                                |
| Israel/99033193/2020             | EPI_ISL_447260 | Microbiology laboratory, Assuta Ashdod University-Affiliated Hospital                                                                                                                                                                                                              | Stem Lab                                                                                                               | 2020-03-26 | Stern Lab et al ( <a href="https://doi.org/10.1101/2020.05.21.20104521">https://doi.org/10.1101/2020.05.21.20104521</a> )                                |
| Israel/ISR_JP0320/2020           | EPI_ISL_419211 | Central Virology Laboratory<br>Department of Infectious Diseases, Istituto Superiore di Sanità, Roma - Italy                                                                                                                                                                       | Israel Institute for Biological Research                                                                               | 2020-02-23 | Inbar Cohen-Gihon et al ( <a href="https://doi.org/10.1101/2020.05.21.20104521">https://doi.org/10.1101/2020.05.21.20104521</a> )                        |
| Italy/206/2020                   | EPI_ISL_457899 | Department of Infectious Diseases, Istituto Superiore di Sanità, Roma - Italy                                                                                                                                                                                                      | Army Medical and Veterinary Research Center                                                                            | 2020-02-22 | Paola Stefanelli et al                                                                                                                                   |
| Italy/2629/2020                  | EPI_ISL_457700 | Department of Infectious Diseases, Istituto Superiore di Sanità, Roma - Italy                                                                                                                                                                                                      | Army Medical and Veterinary Research Center                                                                            | 2020-03-06 | Paola Stefanelli et al                                                                                                                                   |
| Italy/484/2020                   | EPI_ISL_457749 | Department of Infectious Diseases, Istituto Superiore di Sanità, Roma - Italy                                                                                                                                                                                                      | Army Medical and Veterinary Research Center                                                                            | 2020-02-27 | Paola Stefanelli et al                                                                                                                                   |
| Italy/4870/2020                  | EPI_ISL_457732 | Department of Infectious Diseases, Istituto Superiore di Sanità, Roma - Italy                                                                                                                                                                                                      | Army Medical and Veterinary Research Center                                                                            | 2020-03-14 | Paola Stefanelli et al                                                                                                                                   |
| Italy/4875/2020                  | EPI_ISL_457724 | Department of Infectious Diseases, Istituto Superiore di Sanità, Roma - Italy                                                                                                                                                                                                      | Army Medical and Veterinary Research Center                                                                            | 2020-03-15 | Paola Stefanelli et al                                                                                                                                   |
| Italy/AMC1-4634/2020             | EPI_ISL_457825 | Army Medical Research Center - Scientific Department                                                                                                                                                                                                                               | Army Medical and Veterinary Research Center                                                                            | 2020-03-25 | Silvia Filio et al                                                                                                                                       |
| Italy/AMC2-1245/2020             | EPI_ISL_457826 | Army Medical Center - Scientific Department                                                                                                                                                                                                                                        | Army Medical and Veterinary Research Center                                                                            | 2020-03-08 | Silvia Filio et al                                                                                                                                       |
| Italy/BG-1639-28Feb/2020         | EPI_ISL_460080 | Molecular Virology Unit, Fondazione IRCCS Policlinico San Matteo - Pavia                                                                                                                                                                                                           | Laboratory of Virology, INMI Lazzaro Spallanzani IRCCS                                                                 | 2020-02-28 | Antonio Piralla et al                                                                                                                                    |
| Italy/BG-5825-22Feb/2020         | EPI_ISL_460079 | Molecular Virology Unit, Fondazione IRCCS Policlinico San Matteo - Pavia                                                                                                                                                                                                           | Laboratory of Virology, INMI Lazzaro Spallanzani IRCCS                                                                 | 2020-02-22 | Barbara Bartolini et al                                                                                                                                  |
| Italy/BG-7158-24Feb/2020         | EPI_ISL_460081 | Molecular Virology Unit, Fondazione IRCCS Policlinico San Matteo - Pavia                                                                                                                                                                                                           | Laboratory of Virology, INMI Lazzaro Spallanzani IRCCS                                                                 | 2020-02-24 | Fausto Baldanti et al                                                                                                                                    |
| Italy/BG-6209-26Feb/2020         | EPI_ISL_460082 | Molecular Virology Unit, Fondazione IRCCS Policlinico San Matteo - Pavia                                                                                                                                                                                                           | Laboratory of Virology, INMI Lazzaro Spallanzani IRCCS                                                                 | 2020-02-26 | Martina Rueca et al                                                                                                                                      |
| Italy/BG-6225-26Feb/2020         | EPI_ISL_460083 | Molecular Virology Unit, Fondazione IRCCS Policlinico San Matteo - Pavia                                                                                                                                                                                                           | Laboratory of Virology, INMI Lazzaro Spallanzani IRCCS                                                                 | 2020-02-26 | Martina Rueca et al                                                                                                                                      |
| Italy/BS-1256-29Feb/2020         | EPI_ISL_460084 | Molecular Virology Unit, Fondazione IRCCS Policlinico San Matteo - Pavia                                                                                                                                                                                                           | Laboratory of Virology, INMI Lazzaro Spallanzani IRCCS                                                                 | 2020-02-29 | Fausto Baldanti et al                                                                                                                                    |
| Italy/CDG1/2020                  | EPI_ISL_412973 | Department of Infectious Diseases, Istituto Superiore di Sanità, Roma - Italy                                                                                                                                                                                                      | Virology Laboratory, Scientific Department, Army Medical Center                                                        | 2020-02-20 | Paola Stefanelli et al ( <a href="https://doi.org/10.2807/1560-7917.ES.2020.25.13.2000303">https://doi.org/10.2807/1560-7917.ES.2020.25.13.2000303</a> ) |
| Italy/CR-7070-24Feb/2020         | EPI_ISL_460085 | Molecular Virology Unit, Fondazione IRCCS Policlinico San Matteo - Pavia                                                                                                                                                                                                           | Laboratory of Virology, INMI Lazzaro Spallanzani IRCCS                                                                 | 2020-02-24 | Maria R. Capobianchi et al                                                                                                                               |
| Italy/CR-6206-26Feb/2020         | EPI_ISL_460087 | Molecular Virology Unit, Fondazione IRCCS Policlinico San Matteo - Pavia                                                                                                                                                                                                           | Laboratory of Virology, INMI Lazzaro Spallanzani IRCCS                                                                 | 2020-02-26 | Cesare E.M. Gruber et al                                                                                                                                 |
| Italy/CR-6214-26Feb/2020         | EPI_ISL_460088 | Molecular Virology Unit, Fondazione IRCCS Policlinico San Matteo - Pavia                                                                                                                                                                                                           | Laboratory of Virology, INMI Lazzaro Spallanzani IRCCS                                                                 | 2020-02-26 | Martina Rueca et al                                                                                                                                      |
| Italy/CR-9491-26Feb/2020         | EPI_ISL_460089 | Molecular Virology Unit, Fondazione IRCCS Policlinico San Matteo - Pavia                                                                                                                                                                                                           | Laboratory of Virology, INMI Lazzaro Spallanzani IRCCS                                                                 | 2020-02-26 | Antonio Di Caro et al                                                                                                                                    |
| Italy/FVG-ICGEB_S5/2020          | EPI_ISL_417419 | Laboratory of Molecular Virology International Center for Genetic Engineering and Biotechnology (ICGEB)                                                                                                                                                                            | ARGO Open Lab Platform for Genome sequencing                                                                           | 2020-03-01 | Licastro D et al ( <a href="https://doi.org/10.1128/JVI.00543-20">https://doi.org/10.1128/JVI.00543-20</a> )                                             |
| Italy/INMI11-B/2020              | EPI_ISL_451304 | Laboratory of Virology, INMI Lazzaro Spallanzani IRCCS                                                                                                                                                                                                                             | Laboratory of Virology, INMI Lazzaro Spallanzani IRCCS                                                                 | 2020-03-23 | Cesare E.M. Gruber et al                                                                                                                                 |
| Italy/INMI4/2020                 | EPI_ISL_417922 | INMI Lazzaro Spallanzani IRCCS                                                                                                                                                                                                                                                     | Laboratory of Virology, INMI Lazzaro Spallanzani IRCCS                                                                 | 2020-02-28 | Cesare E. M. Gruber et al                                                                                                                                |
| Italy/INMI9/2020                 | EPI_ISL_424343 | INMI Lazzaro Spallanzani IRCCS                                                                                                                                                                                                                                                     | Laboratory of Virology, INMI Lazzaro Spallanzani IRCCS                                                                 | 2020-03-23 | Fabrizio Carletti et al                                                                                                                                  |
| Italy/ZSPB_809/2020              | EPI_ISL_460920 | INMI Zoonofiatrico Sperimentale Puglia e Basilicata; Dipartimento di Bioscienze, Biotecnologie e Biofarmaceutica dell'Università degli Studi di Bari "A.Moro"; Istituto di Biomeccanica, Biotecnologica e Biotecnologica Molecolare del Consiglio Nazionale delle Ricerche di Bari | Beaconlab (Bioinformatics, Evolution and Comparative Genomics lab), Dept of Biosciences, University of Milan           | 2020-03-19 | Patrisi A. et al                                                                                                                                         |
| Italy/ZSPB_CL1/2020              | EPI_ISL_451961 | INMI Zoonofiatrico Sperimentale Puglia e Basilicata; Dipartimento di Bioscienze, Biotecnologie e Biofarmaceutica dell'Università degli Studi di Bari "A.Moro"; Istituto di Biomeccanica, Biotecnologica e Biotecnologica Molecolare del Consiglio Nazionale delle Ricerche di Bari | Beaconlab (Bioinformatics Evolution and Comparative Genomics lab), Dept of Biosciences, University of Milan            | 2020-03-14 | Patrisi A. et al                                                                                                                                         |
| Italy/LO-1550-28Feb/2020         | EPI_ISL_460090 | Molecular Virology Unit, Fondazione IRCCS Policlinico San Matteo - Pavia                                                                                                                                                                                                           | Laboratory of Virology, INMI Lazzaro Spallanzani IRCCS                                                                 | 2020-02-28 | Antonio Piralla et al                                                                                                                                    |
| Italy/LO-13075-N/2020            | EPI_ISL_451309 | Molecular Virology Unit, Fondazione IRCCS Policlinico San Matteo - Pavia                                                                                                                                                                                                           | Laboratory of Virology, INMI Lazzaro Spallanzani IRCCS                                                                 | 2020-03-01 | Fausto Baldanti et al                                                                                                                                    |
| Italy/MI-6925-22Feb/2020         | EPI_ISL_460091 | Molecular Virology Unit, Fondazione IRCCS Policlinico San Matteo - Pavia                                                                                                                                                                                                           | Laboratory of Virology, INMI Lazzaro Spallanzani IRCCS                                                                 | 2020-02-22 | Antonio Di Caro et al                                                                                                                                    |
| Italy/PIV-11951-28Feb/2020       | EPI_ISL_460092 | Molecular Virology Unit, Fondazione IRCCS Policlinico San Matteo - Pavia                                                                                                                                                                                                           | Laboratory of Virology, INMI Lazzaro Spallanzani IRCCS                                                                 | 2020-02-28 | Cesare E.M. Gruber et al                                                                                                                                 |
| Italy/PIV-12579-29Feb/2020       | EPI_ISL_460093 | Molecular Virology Unit, Fondazione IRCCS Policlinico San Matteo - Pavia                                                                                                                                                                                                           | Laboratory of Virology, INMI Lazzaro Spallanzani IRCCS                                                                 | 2020-02-29 | Maria R. Capobianchi et al                                                                                                                               |
| Italy/PIV-6314-B/2020            | EPI_ISL_451306 | Molecular Virology Unit, Fondazione IRCCS Policlinico San Matteo - Pavia                                                                                                                                                                                                           | Laboratory of Virology, INMI Lazzaro Spallanzani IRCCS                                                                 | 2020-02-21 | Antonio Piralla et al                                                                                                                                    |
| Italy/PIV-6314-N/2020            | EPI_ISL_451307 | Molecular Virology Unit, Fondazione IRCCS Policlinico San Matteo - Pavia                                                                                                                                                                                                           | Laboratory of Virology, INMI Lazzaro Spallanzani IRCCS                                                                 | 2020-02-21 | Fausto Baldanti et al                                                                                                                                    |
| Italy/PIV-6058-25Feb/2020        | EPI_ISL_460094 | Molecular Virology Unit, Fondazione IRCCS Policlinico San Matteo - Pavia                                                                                                                                                                                                           | Laboratory of Virology, INMI Lazzaro Spallanzani IRCCS                                                                 | 2020-02-25 | Barbara Bartolini et al                                                                                                                                  |
| Italy/PIV-9675-26Feb/2020        | EPI_ISL_460095 | Molecular Virology Unit, Fondazione IRCCS Policlinico San Matteo - Pavia                                                                                                                                                                                                           | Laboratory of Virology, INMI Lazzaro Spallanzani IRCCS                                                                 | 2020-02-26 | Barbara Bartolini et al                                                                                                                                  |
| ITALY/SardiniaNuoro04039046/2020 | EPI_ISL_458084 | Laboratorio Biologia Molecolare Sara Cov2 - UOC Laboratorio Analisi - Servizio Medicina di Laboratorio, Ospedale "San Francesco" - ATS-ASSL NUORO                                                                                                                                  | Laboratorio specialistico UOC Ematologia - Ospedale "San Francesco" - ATS-ASSL NUORO                                   | 2020-04-03 | Piras Giovanna et al                                                                                                                                     |
| ITALY/SardiniaNuoro05029/2020    | EPI_ISL_458085 | Laboratorio Biologia Molecolare Sara Cov2 - UOC Laboratorio Analisi - Servizio Medicina di Laboratorio, Ospedale "San Francesco" - ATS-ASSL NUORO                                                                                                                                  | Laboratorio specialistico UOC Ematologia - Ospedale "San Francesco" - ATS-ASSL NUORO                                   | 2020-04-12 | Piras Giovanna et al                                                                                                                                     |
| Italy/TE12337/2020               | EPI_ISL_435146 | Villa Serena del Dr. Leonardo Patruzzi                                                                                                                                                                                                                                             | Istituto Zoonofiatrico Sperimentale dell'Abruzzo e Molise "G. Caporale"                                                | 2020-04-07 | Lorusso A et al                                                                                                                                          |
| Italy/TE12759/2020               | EPI_ISL_435147 | Villa Serena del Dr. Leonardo Patruzzi                                                                                                                                                                                                                                             | Istituto Zoonofiatrico Sperimentale dell'Abruzzo e Molise "G. Caporale"                                                | 2020-04-08 | Lorusso A et al                                                                                                                                          |
| Italy/TE12774/2020               | EPI_ISL_435150 | Ospedale SS Annunziata                                                                                                                                                                                                                                                             | Istituto Zoonofiatrico Sperimentale dell'Abruzzo e Molise "G. Caporale"                                                | 2020-04-08 | Lorusso A et al                                                                                                                                          |
| Italy/TE13457/2020               | EPI_ISL_435149 | SERVIZIO DI IGIENE E SANITÀ PUBBLICA ASL Teramo                                                                                                                                                                                                                                    | Istituto Zoonofiatrico Sperimentale dell'Abruzzo e Molise "G. Caporale"                                                | 2020-04-08 | Lorusso A et al                                                                                                                                          |
| Italy/TE13484/2020               | EPI_ISL_435151 | Ospedale SS Annunziata                                                                                                                                                                                                                                                             | Istituto Zoonofiatrico Sperimentale dell'Abruzzo e Molise "G. Caporale"                                                | 2020-04-08 | Lorusso A et al                                                                                                                                          |
| Italy/TE13491/2020               | EPI_ISL_435148 | Ospedale SS Annunziata                                                                                                                                                                                                                                                             | Istituto Zoonofiatrico Sperimentale dell'Abruzzo e Molise "G. Caporale"                                                | 2020-04-08 | Lorusso A et al                                                                                                                                          |
| Italy/TE13858/2020               | EPI_ISL_435152 | Servizio di Igiene, Epidemiologia e Sanità Pubblica (SIESP) Avezzano                                                                                                                                                                                                               | Istituto Zoonofiatrico Sperimentale dell'Abruzzo e Molise "G. Caporale"                                                | 2020-04-09 | Lorusso A et al                                                                                                                                          |
| Italy/TE14162/2020               | EPI_ISL_435154 | SERVIZIO DI IGIENE E SANITÀ PUBBLICA ASL Teramo                                                                                                                                                                                                                                    | Istituto Zoonofiatrico Sperimentale dell'Abruzzo e Molise "G. Caporale"                                                | 2020-04-09 | Lorusso A et al                                                                                                                                          |
| Italy/TE14168/2020               | EPI_ISL_435155 | SERVIZIO DI IGIENE E SANITÀ PUBBLICA ASL Teramo                                                                                                                                                                                                                                    | Istituto Zoonofiatrico Sperimentale dell'Abruzzo e Molise "G. Caporale"                                                | 2020-04-09 | Lorusso A et al                                                                                                                                          |
| Italy/TE14297/2020               | EPI_ISL_435153 | SERVIZIO DI IGIENE E SANITÀ PUBBLICA ASL Teramo                                                                                                                                                                                                                                    | Istituto Zoonofiatrico Sperimentale dell'Abruzzo e Molise "G. Caporale"                                                | 2020-04-09 | Lorusso A et al                                                                                                                                          |
| Italy/TE28423/2020               | EPI_ISL_436731 | Ospedale Civile S. Liberatore di Atri                                                                                                                                                                                                                                              | Istituto Zoonofiatrico Sperimentale dell'Abruzzo e Molise "G. Caporale"                                                | 2020-04-26 | Lorusso A et al                                                                                                                                          |
| Italy/TE28425/2020               | EPI_ISL_436732 | Ospedale Civile S. Liberatore di Atri                                                                                                                                                                                                                                              | Istituto Zoonofiatrico Sperimentale dell'Abruzzo e Molise "G. Caporale"                                                | 2020-04-27 | Lorusso A et al                                                                                                                                          |
| Italy/TE28633/2020               | EPI_ISL_436726 | SERVIZIO DI IGIENE E SANITÀ PUBBLICA ASL Teramo                                                                                                                                                                                                                                    | Istituto Zoonofiatrico Sperimentale dell'Abruzzo e Molise "G. Caporale"                                                | 2020-04-27 | Lorusso A et al                                                                                                                                          |
| Italy/TE28640/2020               | EPI_ISL_436728 | SERVIZIO DI IGIENE E SANITÀ PUBBLICA ASL Teramo                                                                                                                                                                                                                                    | Istituto Zoonofiatrico Sperimentale dell'Abruzzo e Molise "G. Caporale"                                                | 2020-04-27 | Lorusso A et al                                                                                                                                          |
| Italy/TE28643/2020               | EPI_ISL_436729 | SERVIZIO DI IGIENE E SANITÀ PUBBLICA ASL Teramo                                                                                                                                                                                                                                    | Istituto Zoonofiatrico Sperimentale dell'Abruzzo e Molise "G. Caporale"                                                | 2020-04-27 | Lorusso A et al                                                                                                                                          |
| Italy/TE29020/2020               | EPI_ISL_436725 | RSARP Villa San Giovanni - Gruppo Edos                                                                                                                                                                                                                                             | Istituto Zoonofiatrico Sperimentale dell'Abruzzo e Molise "G. Caporale"                                                | 2020-04-27 | Lorusso A et al                                                                                                                                          |
| Italy/TE4836/2020                | EPI_ISL_418260 | Ospedale Civile Giuseppe Mazzini                                                                                                                                                                                                                                                   | Istituto Zoonofiatrico Sperimentale dell'Abruzzo e Molise "G. Caporale"                                                | 2020-03-16 | Lorusso A et al                                                                                                                                          |
| Italy/TE4825/2020                | EPI_ISL_418255 | Presidio Ospedaliero "Santo Spirito" - PESCARA                                                                                                                                                                                                                                     | Istituto Zoonofiatrico Sperimentale dell'Abruzzo e Molise "G. Caporale"                                                | 2020-03-14 | Lorusso A et al                                                                                                                                          |
| Italy/TE4859/2020                | EPI_ISL_418259 | Presidio ospedaliero "Santo Spirito"                                                                                                                                                                                                                                               | Istituto Zoonofiatrico Sperimentale dell'Abruzzo e Molise "G. Caporale"                                                | 2020-03-14 | Lorusso A et al                                                                                                                                          |
| Italy/TE5052/2020                | EPI_ISL_418261 | Ospedale Civile Giuseppe Mazzini                                                                                                                                                                                                                                                   | Istituto Zoonofiatrico Sperimentale dell'Abruzzo e Molise "G. Caporale"                                                | 2020-03-17 | Lorusso A et al                                                                                                                                          |
| Italy/TE5056/2020                | EPI_ISL_418257 | Ospedale Civile Giuseppe Mazzini, Teramo                                                                                                                                                                                                                                           | Istituto Zoonofiatrico Sperimentale dell'Abruzzo e Molise "G. Caporale"                                                | 2020-03-17 | Lorusso A et al                                                                                                                                          |
| Italy/TE5166/2020                | EPI_ISL_420563 | Ospedale Civile Giuseppe Mazzini                                                                                                                                                                                                                                                   | Istituto Zoonofiatrico Sperimentale dell'Abruzzo e Molise "G. Caporale"                                                | 2020-03-18 | Lorusso A et al                                                                                                                                          |
| Italy/TE5473/2020                | EPI_ISL_436718 | Ospedale Regionale San Salvatore                                                                                                                                                                                                                                                   | Istituto Zoonofiatrico Sperimentale dell'Abruzzo e Molise "G. Caporale"                                                | 2020-03-19 | Lorusso A et al                                                                                                                                          |
| Italy/TE5545/2020                | EPI_ISL_436721 | Ospedale Civile S. Liberatore di Atri                                                                                                                                                                                                                                              | Istituto Zoonofiatrico Sperimentale dell'Abruzzo e Molise "G. Caporale"                                                | 2020-03-20 | Lorusso A et al                                                                                                                                          |
| Italy/TE5547/2020                | EPI_ISL_436722 | Ospedale Civile S. Liberatore di Atri                                                                                                                                                                                                                                              | Istituto Zoonofiatrico Sperimentale dell'Abruzzo e Molise "G. Caporale"                                                | 2020-03-20 | Lorusso A et al                                                                                                                                          |
| Italy/TE5551/2020                | EPI_ISL_429226 | Presidio Ospedaliero Santo Spirito                                                                                                                                                                                                                                                 | Istituto Zoonofiatrico Sperimentale dell'Abruzzo e Molise "G. Caporale"                                                | 2020-03-17 | Lorusso A et al                                                                                                                                          |
| Italy/TE5674/2020                | EPI_ISL_429228 | Ospedale Civile Giuseppe Mazzini                                                                                                                                                                                                                                                   | Istituto Zoonofiatrico Sperimentale dell'Abruzzo e Molise "G. Caporale"                                                | 2020-03-20 | Lorusso A et al                                                                                                                                          |
| Italy/TE5687/2020                | EPI_ISL_436723 | Ospedale Civile Giuseppe Mazzini                                                                                                                                                                                                                                                   | Istituto Zoonofiatrico Sperimentale dell'Abruzzo e Molise "G. Caporale"                                                | 2020-03-20 | Lorusso A et al                                                                                                                                          |
| Italy/TE6195/2020                | EPI_ISL_420569 | Ospedale Civile Giuseppe Mazzini                                                                                                                                                                                                                                                   | Istituto Zoonofiatrico Sperimentale dell'Abruzzo e Molise "G. Caporale"                                                | 2020-03-23 | Lorusso A et al                                                                                                                                          |
| Italy/TE6572/2020                | EPI_ISL_429232 | Ospedale Civile Giuseppe Mazzini                                                                                                                                                                                                                                                   | Istituto Zoonofiatrico Sperimentale dell'Abruzzo e Molise "G. Caporale"                                                | 2020-03-24 | Lorusso A et al                                                                                                                                          |
| Italy/TE6575/2020                | EPI_ISL_429233 | Ospedale Civile Giuseppe Mazzini                                                                                                                                                                                                                                                   | Istituto Zoonofiatrico Sperimentale dell'Abruzzo e Molise "G. Caporale"                                                | 2020-03-24 | Lorusso A et al                                                                                                                                          |
| Italy/TE6844/2020                | EPI_ISL_435145 | Ospedale Civile Giuseppe Mazzini                                                                                                                                                                                                                                                   | Istituto Zoonofiatrico Sperimentale dell'Abruzzo e Molise "G. Caporale"                                                | 2020-03-24 | Lorusso A et al                                                                                                                                          |
| Italy/UMI001/2020                | EPI_ISL_417445 | Laboratory of Infectious Diseases, Department of Biomedical and Clinical Sciences L. Sacco, University of Milan                                                                                                                                                                    | Laboratory of Infectious Diseases, Department of Biomedical and Clinical Sciences L. Sacco, University of Milan        | 2020-02-24 | Gianguglielmo Zehender et al                                                                                                                             |
| Italy/UMI003/2020                | EPI_ISL_417447 | Laboratory of Infectious Diseases, Department of Biomedical and Clinical Sciences L. Sacco, University of Milan                                                                                                                                                                    | Laboratory of Infectious Diseases, Department of Biomedical and Clinical Sciences L. Sacco, University of Milan        | 2020-02-24 | Gianguglielmo Zehender et al                                                                                                                             |
| Italy/USR1/2020                  | EPI_ISL_413489 | Laboratorio di Microbiologia e Virologia, Università Vita-Salute San Raffaele, Milano                                                                                                                                                                                              | Laboratorio di Microbiologia e Virologia, Università Vita-Salute San Raffaele, Milano                                  | 2020-03-03 | R.A. Dotti et al                                                                                                                                         |
| Italy/VR_20COV/25-80/2020        | EPI_ISL_452186 | ULSS9 Distretto di Bussolengo                                                                                                                                                                                                                                                      | Istituto Zoonofiatrico Sperimentale delle Venezie                                                                      | 2020-03-28 | Adeleide Miani et al                                                                                                                                     |
| Italy/VR_20COV/31-19/2020        | EPI_ISL_452188 | ULSS9 Distretto di Bussolengo                                                                                                                                                                                                                                                      | Istituto Zoonofiatrico Sperimentale delle Venezie                                                                      | 2020-03-31 | Adeleide Miani et al                                                                                                                                     |
| Italy/VR_20COV/33-126/2020       | EPI_ISL_452189 | ULSS9 Distretto di Bussolengo                                                                                                                                                                                                                                                      | Istituto Zoonofiatrico Sperimentale delle Venezie                                                                      | 2020-04-01 | Adeleide Miani et al                                                                                                                                     |
| Italy/VR_20COV/46-23/2020        | EPI_ISL_452191 | ULSS9 Distretto di San Bonifacio                                                                                                                                                                                                                                                   | Istituto Zoonofiatrico Sperimentale delle Venezie                                                                      | 2020-04-03 | Adeleide Miani et al                                                                                                                                     |
| Italy/VR_20COV/46-8/2020         | EPI_ISL_452190 | ULSS9 Distretto di San Bonifacio                                                                                                                                                                                                                                                   | Istituto Zoonofiatrico Sperimentale delle Venezie                                                                      | 2020-04-03 | Adeleide Miani et al                                                                                                                                     |
| Jamaica/JM-CDC-4376/2020         | EPI_ISL_450794 | Jamaica Ministry of Health and Wellness                                                                                                                                                                                                                                            | Istituto Zoonofiatrico Sperimentale delle Venezie                                                                      | 2020-03-31 | Yan Li et al                                                                                                                                             |
| Jamaica/JM-CDC-6603/2020         | EPI_ISL_450797 | Jamaica Ministry of Health and Wellness                                                                                                                                                                                                                                            | Pathogen Discovery, Respiratory Viruses Branch, Division of Viral Diseases, Centers for Disease Control and Prevention | 2020-03-16 | Yan Li et al                                                                                                                                             |
| Jamaica/JM-CDC-6729/2020         | EPI_ISL_450798 | Jamaica Ministry of Health and Wellness                                                                                                                                                                                                                                            | Pathogen Discovery, Respiratory Viruses Branch, Division of Viral Diseases, Centers for Disease Control and Prevention | 2020-03-16 | Krista Queen et al                                                                                                                                       |
| Jamaica/JM-CDC-7286/2020         | EPI_ISL_450799 | Jamaica Ministry of Health and Wellness                                                                                                                                                                                                                                            | Pathogen Discovery, Respiratory Viruses Branch, Division of Viral Diseases, Centers for Disease Control and Prevention | 2020-03-17 | Yan Li et al                                                                                                                                             |
| Japan/H-1004/2020                | EPI_ISL_407084 | Department of Virology II, National Institute of                                                                                                                                                                                                                                   |                                                                                                                        |            |                                                                                                                                                          |







|                                       |                |                                                                                |                                                                                                           |            |                                                                                                                                                     |
|---------------------------------------|----------------|--------------------------------------------------------------------------------|-----------------------------------------------------------------------------------------------------------|------------|-----------------------------------------------------------------------------------------------------------------------------------------------------|
| Morocco15N2020                        | EPI_ISL_458150 | ANOJAL                                                                         | ANOJAL                                                                                                    | 2020-05-15 | Jouaf Farah et al                                                                                                                                   |
| Morocco6887/2020                      | EPI_ISL_459966 | Institut Pasteur du Maroc                                                      | Institut Pasteur du Maroc                                                                                 | 2020-03-03 | Marion Barbet et al                                                                                                                                 |
| Morocco6888/2020                      | EPI_ISL_459966 | Institut Pasteur du Maroc                                                      | Institut Pasteur du Maroc                                                                                 | 2020-03-15 | Marion Barbet et al                                                                                                                                 |
| Morocco6889/2020                      | EPI_ISL_459967 | Institut Pasteur du Maroc                                                      | Institut Pasteur du Maroc                                                                                 | 2020-03-15 | Marion Barbet et al                                                                                                                                 |
| Morocco6890/2020                      | EPI_ISL_459968 | Institut Pasteur du Maroc                                                      | Institut Pasteur du Maroc                                                                                 | 2020-03-17 | Marion Barbet et al                                                                                                                                 |
| Morocco6891/2020                      | EPI_ISL_459969 | Institut Pasteur du Maroc                                                      | Institut Pasteur du Maroc                                                                                 | 2020-03-20 | Marion Barbet et al                                                                                                                                 |
| Morocco6892/2020                      | EPI_ISL_459970 | Institut Pasteur du Maroc                                                      | Institut Pasteur du Maroc                                                                                 | 2020-03-17 | Marion Barbet et al                                                                                                                                 |
| Morocco6893/2020                      | EPI_ISL_459971 | Institut Pasteur du Maroc                                                      | Institut Pasteur du Maroc                                                                                 | 2020-03-18 | Marion Barbet et al                                                                                                                                 |
| Morocco6894/2020                      | EPI_ISL_459972 | Institut Pasteur du Maroc                                                      | Institut Pasteur du Maroc                                                                                 | 2020-03-20 | Marion Barbet et al                                                                                                                                 |
| Morocco6895/2020                      | EPI_ISL_459973 | Institut Pasteur du Maroc                                                      | Institut Pasteur du Maroc                                                                                 | 2020-03-20 | Marion Barbet et al                                                                                                                                 |
| Morocco6896/2020                      | EPI_ISL_459974 | Institut Pasteur du Maroc                                                      | Institut Pasteur du Maroc                                                                                 | 2020-03-20 | Marion Barbet et al                                                                                                                                 |
| Morocco6897/2020                      | EPI_ISL_459975 | Institut Pasteur du Maroc                                                      | Institut Pasteur du Maroc                                                                                 | 2020-03-21 | Marion Barbet et al                                                                                                                                 |
| Morocco6898/2020                      | EPI_ISL_459976 | Institut Pasteur du Maroc                                                      | Institut Pasteur du Maroc                                                                                 | 2020-03-16 | Marion Barbet et al                                                                                                                                 |
| Morocco6899/2020                      | EPI_ISL_459977 | Institut Pasteur du Maroc                                                      | Institut Pasteur du Maroc                                                                                 | 2020-04-21 | Marion Barbet et al                                                                                                                                 |
| Morocco6900/2020                      | EPI_ISL_459978 | Institut Pasteur du Maroc                                                      | Institut Pasteur du Maroc                                                                                 | 2020-04-20 | Marion Barbet et al                                                                                                                                 |
| Morocco6901/2020                      | EPI_ISL_459979 | Institut Pasteur du Maroc                                                      | Institut Pasteur du Maroc                                                                                 | 2020-04-19 | Marion Barbet et al                                                                                                                                 |
| Morocco6902/2020                      | EPI_ISL_459980 | Institut Pasteur du Maroc                                                      | Institut Pasteur du Maroc                                                                                 | 2020-04-19 | Marion Barbet et al                                                                                                                                 |
| Morocco6903/2020                      | EPI_ISL_459981 | Institut Pasteur du Maroc                                                      | Institut Pasteur du Maroc                                                                                 | 2020-04-19 | Marion Barbet et al                                                                                                                                 |
| Morocco6904/2020                      | EPI_ISL_459982 | Institut Pasteur du Maroc                                                      | Institut Pasteur du Maroc                                                                                 | 2020-04-18 | Marion Barbet et al                                                                                                                                 |
| Morocco6905/2020                      | EPI_ISL_459983 | Institut Pasteur du Maroc                                                      | Institut Pasteur du Maroc                                                                                 | 2020-04-21 | Marion Barbet et al                                                                                                                                 |
| Morocco6906/2020                      | EPI_ISL_459984 | Institut Pasteur du Maroc                                                      | Institut Pasteur du Maroc                                                                                 | 2020-04-06 | Marion Barbet et al                                                                                                                                 |
| MoroccoOUA677-19/2020                 | EPI_ISL_451400 | Laboratoire de Recherche et d'Analyse Médicale de la Gendarmerie Royale        | Laboratoire de Recherche et d'Analyse Médicale de la Gendarmerie Royale                                   | 2020-04-23 | Sanaâ LEMRISSE et al                                                                                                                                |
| MoroccoRMP5-01/2020                   | EPI_ISL_469017 | LNR National Reference Laboratory, Mohammed VI University of Health Sciences   | Medical Biotechnology Laboratory, Rabat Medical and Pharmacy School, Mohammed The Vth University in Rabat | 2020-04-13 | Meriem LAAMARTI et al                                                                                                                               |
| MoroccoRMP5-02/2020                   | EPI_ISL_469049 | LNR National Reference Laboratory, Mohammed VI University of Health Sciences   | Medical Biotechnology Laboratory, Rabat Medical and Pharmacy School, Mohammed The Vth University in Rabat | 2020-03-30 | Meriem LAAMARTI et al                                                                                                                               |
| MoroccoRMP5-03/2020                   | EPI_ISL_469051 | LNR National Reference Laboratory, Mohammed VI University of Health Sciences   | Medical Biotechnology Laboratory, Rabat Medical and Pharmacy School, Mohammed The Vth University in Rabat | 2020-04-03 | Meriem LAAMARTI et al                                                                                                                               |
| MoroccoRMP5-04/2020                   | EPI_ISL_469052 | LNR National Reference Laboratory, Mohammed VI University of Health Sciences   | Medical Biotechnology Laboratory, Rabat Medical and Pharmacy School, Mohammed The Vth University in Rabat | 2020-03-30 | Meriem LAAMARTI et al                                                                                                                               |
| MoroccoRMP5-05/2020                   | EPI_ISL_469053 | LNR National Reference Laboratory, Mohammed VI University of Health Sciences   | Medical Biotechnology Laboratory, Rabat Medical and Pharmacy School, Mohammed The Vth University in Rabat | 2020-03-30 | Meriem LAAMARTI et al                                                                                                                               |
| MoroccoRMP5-06/2020                   | EPI_ISL_469054 | LNR National Reference Laboratory, Mohammed VI University of Health Sciences   | Medical Biotechnology Laboratory, Rabat Medical and Pharmacy School, Mohammed The Vth University in Rabat | 2020-04-01 | Meriem LAAMARTI et al                                                                                                                               |
| Nanchang/JX155/2020                   | EPI_ISL_421262 | Jiangxi Province Center for Disease Control and Prevention                     | Jiangxi Province Center for Disease Control and Prevention                                                | 2020-01-29 | JianXiong Li et al                                                                                                                                  |
| Nepal61/2020                          | EPI_ISL_410301 | National Influenza Centre, National Public Health Laboratory, Kathmandu, Nepal | The University of Hong Kong                                                                               | 2020-01-13 | Ranjit Sahi et al ( <a href="http://biorxiv.org/lookup/doi/10.1101/2020.04.01.019483">http://biorxiv.org/lookup/doi/10.1101/2020.04.01.019483</a> ) |
| Netherlands/Berlicum_1363564/2020     | EPI_ISL_413565 | Foundation Parren                                                              | Erasmus Medical Center                                                                                    | 2020-02-24 | David Neuenhijse et al A ( <a href="https://dx.doi.org/10.1101/2020.04.21.050633">https://dx.doi.org/10.1101/2020.04.21.050633</a> )                |
| Netherlands/Delft_1363444/2020        | EPI_ISL_413569 | RIVM                                                                           | Erasmus Medical Center                                                                                    | 2020-02-28 | David Neuenhijse et al A ( <a href="https://dx.doi.org/10.1101/2020.04.21.050633">https://dx.doi.org/10.1101/2020.04.21.050633</a> )                |
| Netherlands/Diemen_1363454/2020       | EPI_ISL_413570 | RIVM                                                                           | Erasmus Medical Center                                                                                    | 2020-02-28 | David Neuenhijse et al A ( <a href="https://dx.doi.org/10.1101/2020.04.21.050633">https://dx.doi.org/10.1101/2020.04.21.050633</a> )                |
| Netherlands/Flvovland_1/2020          | EPI_ISL_415460 | Dutch COVID-19 response team                                                   | Erasmus Medical Center                                                                                    | 2020-03-09 | Bas Oude Munnink et al                                                                                                                              |
| Netherlands/Flvovland_16/2020         | EPI_ISL_460839 | Dutch COVID-19 response team                                                   | Erasmus Medical Center                                                                                    | 2020-05-20 | Bas Oude Munnink et al                                                                                                                              |
| Netherlands/Flvovland_6/2020          | EPI_ISL_460639 | Dutch COVID-19 response team                                                   | Erasmus Medical Center                                                                                    | 2020-04-15 | Bas Oude Munnink et al                                                                                                                              |
| Netherlands/Flvovland_7/2020          | EPI_ISL_460640 | Dutch COVID-19 response team                                                   | Erasmus Medical Center                                                                                    | 2020-04-15 | Bas Oude Munnink et al                                                                                                                              |
| Netherlands/Frieland_15/2020          | EPI_ISL_455118 | Dutch COVID-19 response team                                                   | Erasmus Medical Center                                                                                    | 2020-03-31 | Bas Oude Munnink et al                                                                                                                              |
| Netherlands/Frieland_26/2020          | EPI_ISL_460648 | Dutch COVID-19 response team                                                   | Erasmus Medical Center                                                                                    | 2020-04-08 | Bas Oude Munnink et al                                                                                                                              |
| Netherlands/Frieland_40/2020          | EPI_ISL_460855 | Dutch COVID-19 response team                                                   | Erasmus Medical Center                                                                                    | 2020-05-01 | Bas Oude Munnink et al                                                                                                                              |
| Netherlands/Frieland_6/2020           | EPI_ISL_422571 | Dutch COVID-19 response team                                                   | Erasmus Medical Center                                                                                    | 2020-03-28 | Bas Oude Munnink et al                                                                                                                              |
| Netherlands/Gelderland_101/2020       | EPI_ISL_460862 | Dutch COVID-19 response team                                                   | Erasmus Medical Center                                                                                    | 2020-05-21 | Bas Oude Munnink et al                                                                                                                              |
| Netherlands/Gelderland_102/2020       | EPI_ISL_460863 | Dutch COVID-19 response team                                                   | Erasmus Medical Center                                                                                    | 2020-05-21 | Bas Oude Munnink et al                                                                                                                              |
| Netherlands/Gelderland_104/2020       | EPI_ISL_460865 | Dutch COVID-19 response team                                                   | Erasmus Medical Center                                                                                    | 2020-05-21 | Bas Oude Munnink et al                                                                                                                              |
| Netherlands/Gelderland_110/2020       | EPI_ISL_460871 | Dutch COVID-19 response team                                                   | Erasmus Medical Center                                                                                    | 2020-05-22 | Bas Oude Munnink et al                                                                                                                              |
| Netherlands/Gelderland_114/2020       | EPI_ISL_460875 | Dutch COVID-19 response team                                                   | Erasmus Medical Center                                                                                    | 2020-05-22 | Bas Oude Munnink et al                                                                                                                              |
| Netherlands/Gelderland_122/2020       | EPI_ISL_460883 | Dutch COVID-19 response team                                                   | Erasmus Medical Center                                                                                    | 2020-05-22 | Bas Oude Munnink et al                                                                                                                              |
| Netherlands/Gelderland_123/2020       | EPI_ISL_460884 | Dutch COVID-19 response team                                                   | Erasmus Medical Center                                                                                    | 2020-05-22 | Bas Oude Munnink et al                                                                                                                              |
| Netherlands/Gelderland_129/2020       | EPI_ISL_460890 | Dutch COVID-19 response team                                                   | Erasmus Medical Center                                                                                    | 2020-05-22 | Bas Oude Munnink et al                                                                                                                              |
| Netherlands/Gelderland_151/2020       | EPI_ISL_460911 | Dutch COVID-19 response team                                                   | Erasmus Medical Center                                                                                    | 2020-05-22 | Bas Oude Munnink et al                                                                                                                              |
| Netherlands/Gelderland_154/2020       | EPI_ISL_460914 | Dutch COVID-19 response team                                                   | Erasmus Medical Center                                                                                    | 2020-05-22 | Bas Oude Munnink et al                                                                                                                              |
| Netherlands/Gelderland_42/2020        | EPI_ISL_460942 | Dutch COVID-19 response team                                                   | Erasmus Medical Center                                                                                    | 2020-04-28 | Bas Oude Munnink et al                                                                                                                              |
| Netherlands/Gelderland_57/2020        | EPI_ISL_460956 | Dutch COVID-19 response team                                                   | Erasmus Medical Center                                                                                    | 2020-05-18 | Bas Oude Munnink et al                                                                                                                              |
| Netherlands/Gelderland_76/2020        | EPI_ISL_460975 | Dutch COVID-19 response team                                                   | Erasmus Medical Center                                                                                    | 2020-05-19 | Bas Oude Munnink et al                                                                                                                              |
| Netherlands/Gelderland_79/2020        | EPI_ISL_460978 | Dutch COVID-19 response team                                                   | Erasmus Medical Center                                                                                    | 2020-05-19 | Bas Oude Munnink et al                                                                                                                              |
| Netherlands/Gelderland_84/2020        | EPI_ISL_460983 | Dutch COVID-19 response team                                                   | Erasmus Medical Center                                                                                    | 2020-05-19 | Bas Oude Munnink et al                                                                                                                              |
| Netherlands/Gelderland_92/2020        | EPI_ISL_460991 | Dutch COVID-19 response team                                                   | Erasmus Medical Center                                                                                    | 2020-05-23 | Bas Oude Munnink et al                                                                                                                              |
| Netherlands/Helmond_1363548/2020      | EPI_ISL_413574 | MHC West-Brabant                                                               | Erasmus Medical Center                                                                                    | 2020-02-29 | David Neuenhijse et al A ( <a href="https://dx.doi.org/10.1101/2020.04.21.050633">https://dx.doi.org/10.1101/2020.04.21.050633</a> )                |
| Netherlands/Houten_1363498/2020       | EPI_ISL_413575 | RIVM                                                                           | Erasmus Medical Center                                                                                    | 2020-02-29 | David Neuenhijse et al A ( <a href="https://dx.doi.org/10.1101/2020.04.21.050633">https://dx.doi.org/10.1101/2020.04.21.050633</a> )                |
| Netherlands/Limburg_19/2020           | EPI_ISL_461007 | Dutch COVID-19 response team                                                   | Erasmus Medical Center                                                                                    | 2020-05-14 | Bas Oude Munnink et al                                                                                                                              |
| Netherlands/Limburg_39/2020           | EPI_ISL_461027 | Dutch COVID-19 response team                                                   | Erasmus Medical Center                                                                                    | 2020-04-19 | Bas Oude Munnink et al                                                                                                                              |
| Netherlands/Limburg_59/2020           | EPI_ISL_461045 | Dutch COVID-19 response team                                                   | Erasmus Medical Center                                                                                    | 2020-04-24 | Bas Oude Munnink et al                                                                                                                              |
| Netherlands/Limburg_62/2020           | EPI_ISL_461048 | Dutch COVID-19 response team                                                   | Erasmus Medical Center                                                                                    | 2020-04-19 | Bas Oude Munnink et al                                                                                                                              |
| Netherlands/Loon_op_zand_1363512/2020 | EPI_ISL_413576 | RIVM                                                                           | Erasmus Medical Center                                                                                    | 2020-02-29 | David Neuenhijse et al A ( <a href="https://dx.doi.org/10.1101/2020.04.21.050633">https://dx.doi.org/10.1101/2020.04.21.050633</a> )                |
| Netherlands/NA_106/2020               | EPI_ISL_422655 | Dutch COVID-19 response team                                                   | Erasmus Medical Center                                                                                    | 2020-03-18 | Bas Oude Munnink et al                                                                                                                              |
| Netherlands/NA_168/2020               | EPI_ISL_422703 | Dutch COVID-19 response team                                                   | Erasmus Medical Center                                                                                    | 2020-03-16 | Bas Oude Munnink et al                                                                                                                              |
| Netherlands/NA_22/2020                | EPI_ISL_415479 | Dutch COVID-19 response team                                                   | Erasmus Medical Center                                                                                    | 2020-03-08 | David Neuenhijse et al A ( <a href="https://dx.doi.org/10.1101/2020.04.21.050633">https://dx.doi.org/10.1101/2020.04.21.050633</a> )                |
| Netherlands/NA_286/2020               | EPI_ISL_422596 | Dutch COVID-19 response team                                                   | Erasmus Medical Center                                                                                    | 2020-03-31 | Bas Oude Munnink et al                                                                                                                              |
| Netherlands/NA_300/2020               | EPI_ISL_422609 | Dutch COVID-19 response team                                                   | Erasmus Medical Center                                                                                    | 2020-04-01 | Bas Oude Munnink et al                                                                                                                              |
| Netherlands/NA_354/2020               | EPI_ISL_455158 | Dutch COVID-19 response team                                                   | Erasmus Medical Center                                                                                    | 2020-04-07 | Bas Oude Munnink et al                                                                                                                              |
| Netherlands/NA_357/2020               | EPI_ISL_455161 | Dutch COVID-19 response team                                                   | Erasmus Medical Center                                                                                    | 2020-04-07 | Bas Oude Munnink et al                                                                                                                              |
| Netherlands/NA_367/2020               | EPI_ISL_455171 | Dutch COVID-19 response team                                                   | Erasmus Medical Center                                                                                    | 2020-04-08 | Bas Oude Munnink et al                                                                                                                              |
| Netherlands/NA_39/2020                | EPI_ISL_422600 | Dutch COVID-19 response team                                                   | Erasmus Medical Center                                                                                    | 2020-03-14 | Bas Oude Munnink et al                                                                                                                              |
| Netherlands/NA_397/2020               | EPI_ISL_455199 | Dutch COVID-19 response team                                                   | Erasmus Medical Center                                                                                    | 2020-04-03 | Bas Oude Munnink et al                                                                                                                              |
| Netherlands/NA_402/2020               | EPI_ISL_455204 | Dutch COVID-19 response team                                                   | Erasmus Medical Center                                                                                    | 2020-04-01 | Bas Oude Munnink et al                                                                                                                              |
| Netherlands/NA_434/2020               | EPI_ISL_455236 | Dutch COVID-19 response team                                                   | Erasmus Medical Center                                                                                    | 2020-04-07 | Bas Oude Munnink et al                                                                                                                              |
| Netherlands/NA_436/2020               | EPI_ISL_455238 | Dutch COVID-19 response team                                                   | Erasmus Medical Center                                                                                    | 2020-04-07 | Bas Oude Munnink et al                                                                                                                              |
| Netherlands/NA_461/2020               | EPI_ISL_455263 | Dutch COVID-19 response team                                                   | Erasmus Medical Center                                                                                    | 2020-04-08 | Bas Oude Munnink et al                                                                                                                              |
| Netherlands/NA_479/2020               | EPI_ISL_455281 | Dutch COVID-19 response team                                                   | Erasmus Medical Center                                                                                    | 2020-04-09 | Bas Oude Munnink et al                                                                                                                              |
| Netherlands/NA_493/2020               | EPI_ISL_460968 | Dutch COVID-19 response team                                                   | Erasmus Medical Center                                                                                    | 2020-03-17 | Bas Oude Munnink et al                                                                                                                              |
| Netherlands/NA_528/2020               | EPI_ISL_460701 | Dutch COVID-19 response team                                                   | Erasmus Medical Center                                                                                    | 2020-03-25 | Bas Oude Munnink et al                                                                                                                              |
| Netherlands/NA_571/2020               | EPI_ISL_460735 | Dutch COVID-19 response team                                                   | Erasmus Medical Center                                                                                    | 2020-04-13 | Bas Oude Munnink et al                                                                                                                              |
| Netherlands/NA_613/2020               | EPI_ISL_460776 | Dutch COVID-19 response team                                                   | Erasmus Medical Center                                                                                    | 2020-04-21 | Bas Oude Munnink et al                                                                                                                              |
| Netherlands/NA_62/2020                | EPI_ISL_422823 | Dutch COVID-19 response team                                                   | Erasmus Medical Center                                                                                    | 2020-03-09 | Bas Oude Munnink et al                                                                                                                              |
| Netherlands/NA_650/2020               | EPI_ISL_461085 | Dutch COVID-19 response team                                                   | Erasmus Medical Center                                                                                    | 2020-05-07 | Bas Oude Munnink et al                                                                                                                              |
| Netherlands/NA_652/2020               | EPI_ISL_461087 | Dutch COVID-19 response team                                                   | Erasmus Medical Center                                                                                    | 2020-05-08 | Bas Oude Munnink et al                                                                                                                              |
| Netherlands/NA_666/2020               | EPI_ISL_461101 | Dutch COVID-19 response team                                                   | Erasmus Medical Center                                                                                    | 2020-02-29 | Bas Oude Munnink et al                                                                                                                              |
| Netherlands/NA_667/2020               | EPI_ISL_461102 | Dutch COVID-19 response team                                                   | Erasmus Medical Center                                                                                    | 2020-03-08 | Bas Oude Munnink et al                                                                                                                              |
| Netherlands/NA_682/2020               | EPI_ISL_461117 | Dutch COVID-19 response team                                                   | Erasmus Medical Center                                                                                    | 2020-03-24 | Bas Oude Munnink et al                                                                                                                              |
| Netherlands/NA_702/2020               | EPI_ISL_461137 | Dutch COVID-19 response team                                                   | Erasmus Medical Center                                                                                    | 2020-04-19 | Bas Oude Munnink et al                                                                                                                              |
| Netherlands/NA_710/2020               | EPI_ISL_461145 | Dutch COVID-19 response team                                                   | Erasmus Medical Center                                                                                    | 2020-05-13 | Bas Oude Munnink et al                                                                                                                              |
| Netherlands/NA_84/2020                | EPI_ISL_422844 | Dutch COVID-19 response team                                                   | Erasmus Medical Center                                                                                    | 2020-03-12 | Bas Oude Munnink et al                                                                                                                              |
| Netherlands/NoordBrabant_1003/2020    | EPI_ISL_454752 | Dutch COVID-19 response team                                                   | National Institute for Public Health and the Environment (RIVM)                                           | 2020-02-28 | Adam Meijer et al                                                                                                                                   |
| Netherlands/NoordBrabant_10039/2020   | EPI_ISL_454788 | Dutch COVID-19 response team                                                   | National Institute for Public Health and the Environment (RIVM)                                           | 2020-03-16 | Adam Meijer et al                                                                                                                                   |
| Netherlands/NoordBrabant_1062/2020    | EPI_ISL_455290 | Dutch COVID-19 response team                                                   | Erasmus Medical Center                                                                                    | 2020-04-06 | Bas Oude Munnink et al                                                                                                                              |
| Netherlands/NoordBrabant_60/2020      | EPI_ISL_415516 | Dutch COVID-19 response team                                                   | Erasmus Medical Center                                                                                    | 2020-03-11 | David Neuenhijse et al A ( <a href="https://dx.doi.org/10.1101/2020.04.21.050633">https://dx.doi.org/10.1101/2020.04.21.050633</a> )                |
| Netherlands/NoordBrabant_97/2020      | EPI_ISL_422891 | Dutch COVID-19 response team                                                   | Erasmus Medical Center                                                                                    | 2020-03-19 | Bas Oude Munnink et al                                                                                                                              |
| Netherlands/NoordHolland_1001/2020    | EPI_ISL_454750 | Dutch COVID-19 response team                                                   | National Institute for Public Health and the Environment (RIVM)                                           | 2020-02-27 | Adam Meijer et al                                                                                                                                   |
| Netherlands/NoordHolland_1002/2020    | EPI_ISL_454751 | Dutch COVID-19 response team                                                   | National Institute for Public Health and the Environment (RIVM)                                           | 2020-02-28 | Adam Meijer et al                                                                                                                                   |
| Netherlands/NoordHolland_10011/2020   | EPI_ISL_454780 | Dutch COVID-19 response team                                                   | National Institute for Public Health and the Environment (RIVM)                                           | 2020-03-14 | Adam Meijer et al                                                                                                                                   |
| Netherlands/Oes_1363500/2020          | EPI_ISL_413581 | RIVM                                                                           | Erasmus Medical Center                                                                                    | 2020-02-29 | David Neuenhijse et al A ( <a href="https://dx.doi.org/10.1101/2020.04.21.050633">https://dx.doi.org/10.1101/2020.04.21.050633</a> )                |
| Netherlands/Ovenijssel_10/2020        | EPI_ISL_460799 | Dutch COVID-19 response team                                                   | Erasmus Medical Center                                                                                    | 2020-04-08 | Bas Oude Munnink et al                                                                                                                              |
| Netherlands/Ovenijssel_35/2020        | EPI_ISL_461227 | Dutch COVID-19 response team                                                   | Erasmus Medical Center                                                                                    | 2020-05-26 | Bas Oude Munnink et al                                                                                                                              |
| Netherlands/Ovenijssel_6/2020         | EPI_ISL_460825 | Dutch COVID-19 response team                                                   | Erasmus Medical Center                                                                                    | 2020-04-06 | Bas Oude Munnink et al                                                                                                                              |
| Netherlands/Tilburg_1363354/2020      | EPI_ISL_413586 | Foundation Elisabeth-Tweesteden Ziekenhuis                                     | Erasmus Medical Center                                                                                    | 2020-02-27 | Bas Oude Munnink et al A ( <a href="https://dx.doi.org/10.1101/2020.04.21.050633">https://dx.doi.org/10.1101/2020.04.21.050633</a> )                |
| Netherlands/Utrecht_27/2020           | EPI_ISL_460830 | Dutch COVID-19 response team                                                   | Erasmus Medical Center                                                                                    | 2020-04-02 | Bas Oude Munnink et al                                                                                                                              |
| Netherlands/Utrecht_5/2020            | EPI_ISL_414439 | Dutch COVID-19 response team                                                   | Erasmus Medical Center                                                                                    | 2020-03-02 | David Neuenhijse et al A ( <a href="https://dx.doi.org/10.1101/2020.04.21.050633">https://dx.doi.org/10.1101/2020.04.21.050633</a> )                |
| Netherlands/Utrecht_7/2020            | EPI_ISL_414440 | Dutch COVID-19 response team                                                   | Erasmus Medical Center                                                                                    | 2020-03-03 | David Neuenhijse et al A ( <a href="https://dx.doi.org/10.1101/2020.04.21.050633">https://dx.doi.org/10.1101/2020.04.21.050633</a> )                |
| Netherlands/Zeealand_16/2020          | EPI_ISL_461254 | Dutch COVID-19 response team                                                   | Erasmus Medical Center                                                                                    | 2020-03-28 | Bas Oude Munnink et al                                                                                                                              |
| Netherlands/Zeealand_5/2020           | EPI_ISL_461287 | Dutch COVID-19 response team                                                   | Erasmus Medical Center                                                                                    | 2020-03-18 | Bas Oude Munnink et al                                                                                                                              |
| Netherlands/ZuidHolland_10004/2020    | EPI_ISL_454753 | Dutch COVID-19 response team                                                   | National Institute for Public Health and the Environment (RIVM)                                           | 2020-02-28 | Adam Meijer et al                                                                                                                                   |
| Netherlands/ZuidHolland_10005/2020    | EPI_ISL_454754 | Dutch COVID-19 response team                                                   | National Institute for Public Health and the Environment (RIVM)                                           | 2020-02-28 | Adam Meijer et al                                                                                                                                   |
| Netherlands/ZuidHolland_104/2020      | EPI_ISL_422903 | Dutch COVID-19 response team                                                   | Erasmus Medical Center                                                                                    | 2020-03-29 | Bas Oude Munnink et al                                                                                                                              |

|                                  |                |                                                                                                                                                                                                                                                              |                                                                                                                            |            |                                                                                                                                                                                                                                                                                                                                                                                                                                                 |
|----------------------------------|----------------|--------------------------------------------------------------------------------------------------------------------------------------------------------------------------------------------------------------------------------------------------------------|----------------------------------------------------------------------------------------------------------------------------|------------|-------------------------------------------------------------------------------------------------------------------------------------------------------------------------------------------------------------------------------------------------------------------------------------------------------------------------------------------------------------------------------------------------------------------------------------------------|
| Netherlands/ZuidHolland_106/2020 | EPI_ISL_455296 | Dutch COVID-19 response team                                                                                                                                                                                                                                 | Erasmus Medical Center                                                                                                     | 2020-04-04 | Bas Oude Munnink et al                                                                                                                                                                                                                                                                                                                                                                                                                          |
| Netherlands/ZuidHolland_130/2020 | EPI_ISL_461303 | Dutch COVID-19 response team                                                                                                                                                                                                                                 | Erasmus Medical Center                                                                                                     | 2020-04-27 | Bas Oude Munnink et al                                                                                                                                                                                                                                                                                                                                                                                                                          |
| Netherlands/ZuidHolland_135/2020 | EPI_ISL_461308 | Dutch COVID-19 response team                                                                                                                                                                                                                                 | Erasmus Medical Center                                                                                                     | 2020-05-07 | Bas Oude Munnink et al                                                                                                                                                                                                                                                                                                                                                                                                                          |
| Netherlands/ZuidHolland_137/2020 | EPI_ISL_461310 | Dutch COVID-19 response team                                                                                                                                                                                                                                 | Erasmus Medical Center                                                                                                     | 2020-05-04 | Bas Oude Munnink et al                                                                                                                                                                                                                                                                                                                                                                                                                          |
| Netherlands/ZuidHolland_146/2020 | EPI_ISL_461319 | Dutch COVID-19 response team                                                                                                                                                                                                                                 | Erasmus Medical Center                                                                                                     | 2020-04-19 | Bas Oude Munnink et al                                                                                                                                                                                                                                                                                                                                                                                                                          |
| Netherlands/ZuidHolland_152/2020 | EPI_ISL_414557 | Dutch COVID-19 response team                                                                                                                                                                                                                                 | Erasmus Medical Center                                                                                                     | 2020-03-08 | David Neuenhuyse et al A ( <a href="https://dx.doi.org/10.1101/2020.04.21.050633">https://dx.doi.org/10.1101/2020.04.21.050633</a> )                                                                                                                                                                                                                                                                                                            |
| Netherlands/ZuidHolland_166/2020 | EPI_ISL_461338 | Dutch COVID-19 response team                                                                                                                                                                                                                                 | Erasmus Medical Center                                                                                                     | 2020-04-16 | Bas Oude Munnink et al                                                                                                                                                                                                                                                                                                                                                                                                                          |
| Netherlands/ZuidHolland_182/2020 | EPI_ISL_414560 | Dutch COVID-19 response team                                                                                                                                                                                                                                 | Erasmus Medical Center                                                                                                     | 2020-03-03 | David Neuenhuyse et al A ( <a href="https://dx.doi.org/10.1101/2020.04.21.050633">https://dx.doi.org/10.1101/2020.04.21.050633</a> )                                                                                                                                                                                                                                                                                                            |
| Netherlands/ZuidHolland_180/2020 | EPI_ISL_461352 | Dutch COVID-19 response team                                                                                                                                                                                                                                 | Erasmus Medical Center                                                                                                     | 2020-04-22 | Bas Oude Munnink et al                                                                                                                                                                                                                                                                                                                                                                                                                          |
| Netherlands/ZuidHolland_182/2020 | EPI_ISL_461354 | Dutch COVID-19 response team                                                                                                                                                                                                                                 | Erasmus Medical Center                                                                                                     | 2020-04-28 | Bas Oude Munnink et al                                                                                                                                                                                                                                                                                                                                                                                                                          |
| Netherlands/ZuidHolland_192/2020 | EPI_ISL_414561 | Dutch COVID-19 response team                                                                                                                                                                                                                                 | Erasmus Medical Center                                                                                                     | 2020-03-05 | David Neuenhuyse et al A ( <a href="https://dx.doi.org/10.1101/2020.04.21.050633">https://dx.doi.org/10.1101/2020.04.21.050633</a> )                                                                                                                                                                                                                                                                                                            |
| Netherlands/ZuidHolland_196/2020 | EPI_ISL_461368 | Dutch COVID-19 response team                                                                                                                                                                                                                                 | Erasmus Medical Center                                                                                                     | 2020-05-02 | Bas Oude Munnink et al                                                                                                                                                                                                                                                                                                                                                                                                                          |
| Netherlands/ZuidHolland_203/2020 | EPI_ISL_461375 | Dutch COVID-19 response team                                                                                                                                                                                                                                 | Erasmus Medical Center                                                                                                     | 2020-05-03 | Bas Oude Munnink et al                                                                                                                                                                                                                                                                                                                                                                                                                          |
| Netherlands/ZuidHolland_207/2020 | EPI_ISL_461379 | Dutch COVID-19 response team                                                                                                                                                                                                                                 | Erasmus Medical Center                                                                                                     | 2020-05-06 | Bas Oude Munnink et al                                                                                                                                                                                                                                                                                                                                                                                                                          |
| Netherlands/ZuidHolland_211/2020 | EPI_ISL_414563 | Dutch COVID-19 response team                                                                                                                                                                                                                                 | Erasmus Medical Center                                                                                                     | 2020-03-03 | David Neuenhuyse et al A ( <a href="https://dx.doi.org/10.1101/2020.04.21.050633">https://dx.doi.org/10.1101/2020.04.21.050633</a> )                                                                                                                                                                                                                                                                                                            |
| Netherlands/ZuidHolland_214/2020 | EPI_ISL_461383 | Dutch COVID-19 response team                                                                                                                                                                                                                                 | Erasmus Medical Center                                                                                                     | 2020-05-07 | Bas Oude Munnink et al                                                                                                                                                                                                                                                                                                                                                                                                                          |
| Netherlands/ZuidHolland_214/2020 | EPI_ISL_461386 | Dutch COVID-19 response team                                                                                                                                                                                                                                 | Erasmus Medical Center                                                                                                     | 2020-05-08 | Bas Oude Munnink et al                                                                                                                                                                                                                                                                                                                                                                                                                          |
| Netherlands/ZuidHolland_86/2020  | EPI_ISL_422954 | Dutch COVID-19 response team                                                                                                                                                                                                                                 | Erasmus Medical Center                                                                                                     | 2020-03-27 | Bas Oude Munnink et al                                                                                                                                                                                                                                                                                                                                                                                                                          |
| NewZealand/01/2020               | EPI_ISL_413490 | Auckland Hospital                                                                                                                                                                                                                                            | Institute of Environmental Science and Research (ESR)                                                                      | 2020-02-27 | Matt Storey et al B ( <a href="https://dx.doi.org/10.1101/2020.03.15.952818">https://dx.doi.org/10.1101/2020.03.15.952818</a> )                                                                                                                                                                                                                                                                                                                 |
| NewZealand/20/R0461/2020         | EPI_ISL_456158 | Southern Community Labs Dunedin                                                                                                                                                                                                                              | Institute of Environmental Science and Research (ESR)                                                                      | 2020-03-13 | Matt Storey et al A                                                                                                                                                                                                                                                                                                                                                                                                                             |
| NewZealand/20/R0995/2020         | EPI_ISL_456178 | LabPLUS                                                                                                                                                                                                                                                      | Institute of Environmental Science and Research (ESR)                                                                      | 2020-03-17 | Matt Storey et al A                                                                                                                                                                                                                                                                                                                                                                                                                             |
| NewZealand/20/R0999/2020         | EPI_ISL_456180 | LabPLUS                                                                                                                                                                                                                                                      | Institute of Environmental Science and Research (ESR)                                                                      | 2020-03-16 | Matt Storey et al A                                                                                                                                                                                                                                                                                                                                                                                                                             |
| NewZealand/20/R1016/2020         | EPI_ISL_456182 | Wellington SCL                                                                                                                                                                                                                                               | Institute of Environmental Science and Research (ESR)                                                                      | 2020-03-20 | Matt Storey et al A                                                                                                                                                                                                                                                                                                                                                                                                                             |
| NewZealand/20/R1019/2020         | EPI_ISL_456183 | Wellington SCL                                                                                                                                                                                                                                               | Institute of Environmental Science and Research (ESR)                                                                      | 2020-03-20 | Matt Storey et al A                                                                                                                                                                                                                                                                                                                                                                                                                             |
| NewZealand/20/R1019/2020         | EPI_ISL_456184 | Wellington SCL                                                                                                                                                                                                                                               | Institute of Environmental Science and Research (ESR)                                                                      | 2020-03-20 | Matt Storey et al A                                                                                                                                                                                                                                                                                                                                                                                                                             |
| NewZealand/20/R1020/2020         | EPI_ISL_456185 | Wellington SCL                                                                                                                                                                                                                                               | Institute of Environmental Science and Research (ESR)                                                                      | 2020-03-20 | Matt Storey et al A                                                                                                                                                                                                                                                                                                                                                                                                                             |
| NewZealand/20/R1022/2020         | EPI_ISL_456186 | Wellington SCL                                                                                                                                                                                                                                               | Institute of Environmental Science and Research (ESR)                                                                      | 2020-03-20 | Matt Storey et al A                                                                                                                                                                                                                                                                                                                                                                                                                             |
| NewZealand/20/R1076/2020         | EPI_ISL_456187 | Wellington SCL                                                                                                                                                                                                                                               | Institute of Environmental Science and Research (ESR)                                                                      | 2020-03-22 | Matt Storey et al A                                                                                                                                                                                                                                                                                                                                                                                                                             |
| NewZealand/20/R1110/2020         | EPI_ISL_456191 | Waikato Hospital                                                                                                                                                                                                                                             | Institute of Environmental Science and Research (ESR)                                                                      | 2020-03-19 | Matt Storey et al A                                                                                                                                                                                                                                                                                                                                                                                                                             |
| NewZealand/20/R1114/2020         | EPI_ISL_456192 | Waikato Hospital                                                                                                                                                                                                                                             | Institute of Environmental Science and Research (ESR)                                                                      | 2020-03-20 | Matt Storey et al A                                                                                                                                                                                                                                                                                                                                                                                                                             |
| NewZealand/20/R1273/2020         | EPI_ISL_456198 | LabPLUS                                                                                                                                                                                                                                                      | Institute of Environmental Science and Research (ESR)                                                                      | 2020-03-21 | Matt Storey et al A                                                                                                                                                                                                                                                                                                                                                                                                                             |
| NewZealand/20/R1282/2020         | EPI_ISL_456207 | LabPLUS                                                                                                                                                                                                                                                      | Institute of Environmental Science and Research (ESR)                                                                      | 2020-03-20 | Matt Storey et al A                                                                                                                                                                                                                                                                                                                                                                                                                             |
| NewZealand/20/R1452/2020         | EPI_ISL_456219 | Southern Community Labs Dunedin                                                                                                                                                                                                                              | Institute of Environmental Science and Research (ESR)                                                                      | 2020-03-21 | Matt Storey et al A                                                                                                                                                                                                                                                                                                                                                                                                                             |
| NewZealand/20/R1615/2020         | EPI_ISL_456225 | Southern Community Labs Dunedin                                                                                                                                                                                                                              | Institute of Environmental Science and Research (ESR)                                                                      | 2020-03-24 | Matt Storey et al A                                                                                                                                                                                                                                                                                                                                                                                                                             |
| NewZealand/20/R1620/2020         | EPI_ISL_456230 | Southern Community Labs Dunedin                                                                                                                                                                                                                              | Institute of Environmental Science and Research (ESR)                                                                      | 2020-03-24 | Matt Storey et al A                                                                                                                                                                                                                                                                                                                                                                                                                             |
| NewZealand/20/R1621/2020         | EPI_ISL_456231 | Southern Community Labs Dunedin                                                                                                                                                                                                                              | Institute of Environmental Science and Research (ESR)                                                                      | 2020-03-24 | Matt Storey et al A                                                                                                                                                                                                                                                                                                                                                                                                                             |
| NewZealand/20/R1624/2020         | EPI_ISL_456234 | Southern Community Labs Dunedin                                                                                                                                                                                                                              | Institute of Environmental Science and Research (ESR)                                                                      | 2020-03-27 | Matt Storey et al A                                                                                                                                                                                                                                                                                                                                                                                                                             |
| NewZealand/20/R1778/2020         | EPI_ISL_456247 | Southern Community Labs Dunedin                                                                                                                                                                                                                              | Institute of Environmental Science and Research (ESR)                                                                      | 2020-03-25 | Matt Storey et al A                                                                                                                                                                                                                                                                                                                                                                                                                             |
| NewZealand/20/R1782/2020         | EPI_ISL_456251 | Southern Community Labs Dunedin                                                                                                                                                                                                                              | Institute of Environmental Science and Research (ESR)                                                                      | 2020-03-26 | Matt Storey et al A                                                                                                                                                                                                                                                                                                                                                                                                                             |
| NewZealand/20/R1784/2020         | EPI_ISL_456253 | Southern Community Labs Dunedin                                                                                                                                                                                                                              | Institute of Environmental Science and Research (ESR)                                                                      | 2020-03-26 | Matt Storey et al A                                                                                                                                                                                                                                                                                                                                                                                                                             |
| NewZealand/20/R1785/2020         | EPI_ISL_456254 | Southern Community Labs Dunedin                                                                                                                                                                                                                              | Institute of Environmental Science and Research (ESR)                                                                      | 2020-03-26 | Matt Storey et al A                                                                                                                                                                                                                                                                                                                                                                                                                             |
| NewZealand/20/R1825/2020         | EPI_ISL_456270 | Southern Community Labs Dunedin                                                                                                                                                                                                                              | Institute of Environmental Science and Research (ESR)                                                                      | 2020-03-27 | Matt Storey et al A                                                                                                                                                                                                                                                                                                                                                                                                                             |
| NewZealand/20/R1843/2020         | EPI_ISL_456281 | Southern Community Labs Dunedin                                                                                                                                                                                                                              | Institute of Environmental Science and Research (ESR)                                                                      | 2020-03-28 | Matt Storey et al A                                                                                                                                                                                                                                                                                                                                                                                                                             |
| NewZealand/20/R1867/2020         | EPI_ISL_456292 | Southern Community Labs Dunedin                                                                                                                                                                                                                              | Institute of Environmental Science and Research (ESR)                                                                      | 2020-03-31 | Matt Storey et al A                                                                                                                                                                                                                                                                                                                                                                                                                             |
| NewZealand/20/R1900/2020         | EPI_ISL_456301 | PathLab Bay of Plenty                                                                                                                                                                                                                                        | Institute of Environmental Science and Research (ESR)                                                                      | 2020-04-04 | Matt Storey et al A                                                                                                                                                                                                                                                                                                                                                                                                                             |
| NewZealand/20/R1911/2020         | EPI_ISL_456306 | Southern Community Labs Dunedin                                                                                                                                                                                                                              | Institute of Environmental Science and Research (ESR)                                                                      | 2020-04-02 | Matt Storey et al A                                                                                                                                                                                                                                                                                                                                                                                                                             |
| NewZealand/20/R1924/2020         | EPI_ISL_456309 | Southern Community Labs Dunedin                                                                                                                                                                                                                              | Institute of Environmental Science and Research (ESR)                                                                      | 2020-04-03 | Matt Storey et al A                                                                                                                                                                                                                                                                                                                                                                                                                             |
| NewZealand/20/R1933/2020         | EPI_ISL_456314 | Southern Community Labs Dunedin                                                                                                                                                                                                                              | Institute of Environmental Science and Research (ESR)                                                                      | 2020-04-03 | Matt Storey et al A                                                                                                                                                                                                                                                                                                                                                                                                                             |
| NewZealand/20/R1937/2020         | EPI_ISL_456316 | Southern Community Labs Dunedin                                                                                                                                                                                                                              | Institute of Environmental Science and Research (ESR)                                                                      | 2020-04-01 | Matt Storey et al A                                                                                                                                                                                                                                                                                                                                                                                                                             |
| NewZealand/20/R1941/2020         | EPI_ISL_456317 | Southern Community Labs Dunedin                                                                                                                                                                                                                              | Institute of Environmental Science and Research (ESR)                                                                      | 2020-04-04 | Matt Storey et al A                                                                                                                                                                                                                                                                                                                                                                                                                             |
| NewZealand/20/R1947/2020         | EPI_ISL_456318 | Southern Community Labs Dunedin                                                                                                                                                                                                                              | Institute of Environmental Science and Research (ESR)                                                                      | 2020-04-03 | Matt Storey et al A                                                                                                                                                                                                                                                                                                                                                                                                                             |
| NewZealand/20/R1995/2020         | EPI_ISL_456325 | Wellington SCL                                                                                                                                                                                                                                               | Institute of Environmental Science and Research (ESR)                                                                      | 2020-04-01 | Matt Storey et al A                                                                                                                                                                                                                                                                                                                                                                                                                             |
| NewZealand/20/R2006/2020         | EPI_ISL_456331 | Wellington SCL                                                                                                                                                                                                                                               | Institute of Environmental Science and Research (ESR)                                                                      | 2020-04-01 | Matt Storey et al A                                                                                                                                                                                                                                                                                                                                                                                                                             |
| NewZealand/20/R2011/2020         | EPI_ISL_456332 | Wellington SCL                                                                                                                                                                                                                                               | Institute of Environmental Science and Research (ESR)                                                                      | 2020-04-01 | Matt Storey et al A                                                                                                                                                                                                                                                                                                                                                                                                                             |
| NewZealand/20/R2045/2020         | EPI_ISL_456344 | Southern Community Labs Dunedin                                                                                                                                                                                                                              | Institute of Environmental Science and Research (ESR)                                                                      | 2020-04-10 | Matt Storey et al A                                                                                                                                                                                                                                                                                                                                                                                                                             |
| NewZealand/20/R2054/2020         | EPI_ISL_456349 | Canterbury Health Laboratories                                                                                                                                                                                                                               | Institute of Environmental Science and Research (ESR)                                                                      | 2020-04-03 | Matt Storey et al A                                                                                                                                                                                                                                                                                                                                                                                                                             |
| NewZealand/20/R2055/2020         | EPI_ISL_456350 | Canterbury Health Laboratories                                                                                                                                                                                                                               | Institute of Environmental Science and Research (ESR)                                                                      | 2020-04-03 | Matt Storey et al A                                                                                                                                                                                                                                                                                                                                                                                                                             |
| NewZealand/20/R2065/2020         | EPI_ISL_456356 | Canterbury Health Laboratories                                                                                                                                                                                                                               | Institute of Environmental Science and Research (ESR)                                                                      | 2020-04-06 | Matt Storey et al A                                                                                                                                                                                                                                                                                                                                                                                                                             |
| NewZealand/20/R2066/2020         | EPI_ISL_456357 | Canterbury Health Laboratories                                                                                                                                                                                                                               | Institute of Environmental Science and Research (ESR)                                                                      | 2020-04-06 | Matt Storey et al A                                                                                                                                                                                                                                                                                                                                                                                                                             |
| NewZealand/20/R2073/2020         | EPI_ISL_456360 | Canterbury Health Laboratories                                                                                                                                                                                                                               | Institute of Environmental Science and Research (ESR)                                                                      | 2020-04-08 | Matt Storey et al A                                                                                                                                                                                                                                                                                                                                                                                                                             |
| NewZealand/20/R2074/2020         | EPI_ISL_456361 | Canterbury Health Laboratories                                                                                                                                                                                                                               | Institute of Environmental Science and Research (ESR)                                                                      | 2020-04-08 | Matt Storey et al A                                                                                                                                                                                                                                                                                                                                                                                                                             |
| NewZealand/20/R2075/2020         | EPI_ISL_456362 | Canterbury Health Laboratories                                                                                                                                                                                                                               | Institute of Environmental Science and Research (ESR)                                                                      | 2020-04-09 | Matt Storey et al A                                                                                                                                                                                                                                                                                                                                                                                                                             |
| NewZealand/20/R2078/2020         | EPI_ISL_456365 | Canterbury Health Laboratories                                                                                                                                                                                                                               | Institute of Environmental Science and Research (ESR)                                                                      | 2020-04-09 | Matt Storey et al A                                                                                                                                                                                                                                                                                                                                                                                                                             |
| NewZealand/20/R2085/2020         | EPI_ISL_456369 | Canterbury Health Laboratories                                                                                                                                                                                                                               | Institute of Environmental Science and Research (ESR)                                                                      | 2020-04-12 | Matt Storey et al A                                                                                                                                                                                                                                                                                                                                                                                                                             |
| NewZealand/20/R2089/2020         | EPI_ISL_456372 | Canterbury Health Laboratories                                                                                                                                                                                                                               | Institute of Environmental Science and Research (ESR)                                                                      | 2020-04-13 | Matt Storey et al A                                                                                                                                                                                                                                                                                                                                                                                                                             |
| NewZealand/20/R2475/2020         | EPI_ISL_456379 | LabPLUS                                                                                                                                                                                                                                                      | Institute of Environmental Science and Research (ESR)                                                                      | 2020-04-15 | Matt Storey et al A                                                                                                                                                                                                                                                                                                                                                                                                                             |
| NewZealand/20/R2554/2020         | EPI_ISL_456385 | Middlemore Hospital                                                                                                                                                                                                                                          | Institute of Environmental Science and Research (ESR)                                                                      | 2020-04-15 | Matt Storey et al A                                                                                                                                                                                                                                                                                                                                                                                                                             |
| NewZealand/20/R2562/2020         | EPI_ISL_456387 | Middlemore Hospital                                                                                                                                                                                                                                          | Institute of Environmental Science and Research (ESR)                                                                      | 2020-04-15 | Matt Storey et al A                                                                                                                                                                                                                                                                                                                                                                                                                             |
| NewZealand/20/R2922/2020         | EPI_ISL_456391 | LabPLUS                                                                                                                                                                                                                                                      | Institute of Environmental Science and Research (ESR)                                                                      | 2020-04-25 | Matt Storey et al A                                                                                                                                                                                                                                                                                                                                                                                                                             |
| NewZealand/20/R2932/2020         | EPI_ISL_456393 | LabPLUS                                                                                                                                                                                                                                                      | Institute of Environmental Science and Research (ESR)                                                                      | 2020-04-25 | Matt Storey et al A                                                                                                                                                                                                                                                                                                                                                                                                                             |
| NewZealand/20/R3004/2020         | EPI_ISL_456396 | North Shore Hospital                                                                                                                                                                                                                                         | Institute of Environmental Science and Research (ESR)                                                                      | 2020-04-25 | Matt Storey et al A                                                                                                                                                                                                                                                                                                                                                                                                                             |
| NewZealand/20/R3038/2020         | EPI_ISL_456400 | Wellington SCL                                                                                                                                                                                                                                               | Institute of Environmental Science and Research (ESR)                                                                      | 2020-04-25 | Matt Storey et al A                                                                                                                                                                                                                                                                                                                                                                                                                             |
| NewZealand/20/R3045/2020         | EPI_ISL_456402 | Wellington SCL                                                                                                                                                                                                                                               | Institute of Environmental Science and Research (ESR)                                                                      | 2020-04-25 | Matt Storey et al A                                                                                                                                                                                                                                                                                                                                                                                                                             |
| NewZealand/Cov001/2020           | EPI_ISL_417211 | Dunedin Hospital                                                                                                                                                                                                                                             | University of Otago                                                                                                        | 2020-03-11 | M.E. Quilley-Mateu et al                                                                                                                                                                                                                                                                                                                                                                                                                        |
| Nigeria/KW017-CV24/2020          | EPI_ISL_455362 | Nigeria Centre for Disease Control (NCDC) Centre for Human and Zoonotic Virology (CHAZV), College of Medicine University of Lagos/Lagos University Teaching Hospital (LUTH), part of the Laboratory Network of the Nigeria Centre for Disease Control (NCDC) | African Centre of Excellence for Genomics of Infectious Diseases (ACEGID), Redeemer's University, Ede, Osun State, Nigeria | 2020-04-10 | Ujunyi P.E. et al A ( <a href="https://virological.org/t/sars-cov-2-genomes-from-nigeria-reveal-community-transmission-multiple-virus-lineages-and-spike-protein-mutation-associated-with-higher-transmission-and-pathogenicity/494">https://virological.org/t/sars-cov-2-genomes-from-nigeria-reveal-community-transmission-multiple-virus-lineages-and-spike-protein-mutation-associated-with-higher-transmission-and-pathogenicity/494</a> ) |
| Nigeria/Lagos01/2020             | EPI_ISL_413550 |                                                                                                                                                                                                                                                              | African Centre of Excellence for Genomics of Infectious Diseases (ACEGID), Redeemer's University, Ede, Osun State, Nigeria | 2020-02-27 | Ujunyi P.E. et al B ( <a href="https://virological.org/t/sars-cov-2-genome-sequence-from-nigeria-covid-19-case421">https://virological.org/t/sars-cov-2-genome-sequence-from-nigeria-covid-19-case421</a> )                                                                                                                                                                                                                                     |
| Nigeria/OS030-CV5/2020           | EPI_ISL_455415 | Nigeria Centre for Disease Control (NCDC)                                                                                                                                                                                                                    | African Centre of Excellence for Genomics of Infectious Diseases (ACEGID), Redeemer's University, Ede, Osun State, Nigeria | 2020-03-29 | Ujunyi P.E. et al A ( <a href="https://virological.org/t/sars-cov-2-genomes-from-nigeria-reveal-community-transmission-multiple-virus-lineages-and-spike-protein-mutation-associated-with-higher-transmission-and-pathogenicity/494">https://virological.org/t/sars-cov-2-genomes-from-nigeria-reveal-community-transmission-multiple-virus-lineages-and-spike-protein-mutation-associated-with-higher-transmission-and-pathogenicity/494</a> ) |
| Nigeria/OS056-CV8/2020           | EPI_ISL_455418 | Nigeria Centre for Disease Control (NCDC)                                                                                                                                                                                                                    | African Centre of Excellence for Genomics of Infectious Diseases (ACEGID), Redeemer's University, Ede, Osun State, Nigeria | 2020-03-29 | Ujunyi P.E. et al A ( <a href="https://virological.org/t/sars-cov-2-genomes-from-nigeria-reveal-community-transmission-multiple-virus-lineages-and-spike-protein-mutation-associated-with-higher-transmission-and-pathogenicity/494">https://virological.org/t/sars-cov-2-genomes-from-nigeria-reveal-community-transmission-multiple-virus-lineages-and-spike-protein-mutation-associated-with-higher-transmission-and-pathogenicity/494</a> ) |
| Nigeria/OS060-CV9/2020           | EPI_ISL_455419 | Nigeria Centre for Disease Control (NCDC)                                                                                                                                                                                                                    | African Centre of Excellence for Genomics of Infectious Diseases (ACEGID), Redeemer's University, Ede, Osun State, Nigeria | 2020-03-29 | Ujunyi P.E. et al A ( <a href="https://virological.org/t/sars-cov-2-genomes-from-nigeria-reveal-community-transmission-multiple-virus-lineages-and-spike-protein-mutation-associated-with-higher-transmission-and-pathogenicity/494">https://virological.org/t/sars-cov-2-genomes-from-nigeria-reveal-community-transmission-multiple-virus-lineages-and-spike-protein-mutation-associated-with-higher-transmission-and-pathogenicity/494</a> ) |
| Nigeria/OS070-CV11/2020          | EPI_ISL_455422 | Nigeria Centre for Disease Control                                                                                                                                                                                                                           | African Centre of Excellence for Genomics of Infectious Diseases (ACEGID), Redeemer's University, Ede, Osun State, Nigeria | 2020-03-29 | Ujunyi P.E. et al A ( <a href="https://virological.org/t/sars-cov-2-genomes-from-nigeria-reveal-community-transmission-multiple-virus-lineages-and-spike-protein-mutation-associated-with-higher-transmission-and-pathogenicity/494">https://virological.org/t/sars-cov-2-genomes-from-nigeria-reveal-community-transmission-multiple-virus-lineages-and-spike-protein-mutation-associated-with-higher-transmission-and-pathogenicity/494</a> ) |
| Nigeria/OS075-CV12/2020          | EPI_ISL_455423 | Nigeria Centre for Disease Control (NCDC)                                                                                                                                                                                                                    | African Centre of Excellence for Genomics of Infectious Diseases (ACEGID), Redeemer's University, Ede, Osun State, Nigeria | 2020-03-29 | Ujunyi P.E. et al A ( <a href="https://virological.org/t/sars-cov-2-genomes-from-nigeria-reveal-community-transmission-multiple-virus-lineages-and-spike-protein-mutation-associated-with-higher-transmission-and-pathogenicity/494">https://virological.org/t/sars-cov-2-genomes-from-nigeria-reveal-community-transmission-multiple-virus-lineages-and-spike-protein-mutation-associated-with-higher-transmission-and-pathogenicity/494</a> ) |
| Nigeria/OS085-CV14/2020          | EPI_ISL_455424 | Nigeria Centre for Disease Control (NCDC)                                                                                                                                                                                                                    | African Centre of Excellence for Genomics of Infectious Diseases (ACEGID), Redeemer's University, Ede, Osun State, Nigeria | 2020-03-29 | Ujunyi P.E. et al A ( <a href="https://virological.org/t/sars-cov-2-genomes-from-nigeria-reveal-community-transmission-multiple-virus-lineages-and-spike-protein-mutation-associated-with-higher-transmission-and-pathogenicity/494">https://virological.org/t/sars-cov-2-genomes-from-nigeria-reveal-community-transmission-multiple-virus-lineages-and-spike-protein-mutation-associated-with-higher-transmission-and-pathogenicity/494</a> ) |
| Nigeria/OS116-CV17/2020          | EPI_ISL_455425 | Nigeria Centre for Disease Control (NCDC)                                                                                                                                                                                                                    | African Centre of Excellence for Genomics of Infectious Diseases (ACEGID), Redeemer's University, Ede, Osun State, Nigeria | 2020-03-29 | Ujunyi P.E. et al A ( <a href="https://virological.org/t/sars-cov-2-genomes-from-nigeria-reveal-community-transmission-multiple-virus-lineages-and-spike-protein-mutation-associated-with-higher-transmission-and-pathogenicity/494">https://virological.org/t/sars-cov-2-genomes-from-nigeria-reveal-community-transmission-multiple-virus-lineages-and-spike-protein-mutation-associated-with-higher-transmission-and-pathogenicity/494</a> ) |
| Nigeria/OS122-CV18/2020          | EPI_ISL_455426 | Nigeria Centre for Disease Control                                                                                                                                                                                                                           | African Centre of Excellence for Genomics of Infectious Diseases (ACEGID), Redeemer's University, Ede, Osun State, Nigeria | 2020-03-29 | Ujunyi P.E. et al A ( <a href="https://virological.org/t/sars-cov-2-genomes-from-nigeria-reveal-community-transmission-multiple-virus-lineages-and-spike-protein-mutation-associated-with-higher-transmission-and-pathogenicity/494">https://virological.org/t/sars-cov-2-genomes-from-nigeria-reveal-community-transmission-multiple-virus-lineages-and-spike-protein-mutation-associated-with-higher-transmission-and-pathogenicity/494</a> ) |
| Nigeria/OS125-CV20/2020          | EPI_ISL_455427 | Nigeria Centre for Disease Control (NCDC)                                                                                                                                                                                                                    | African Centre of Excellence for Genomics of Infectious Diseases (ACEGID), Redeemer's University, Ede, Osun State, Nigeria | 2020-03-29 | Ujunyi P.E. et al A ( <a href="https://virological.org/t/sars-cov-2-genomes-from-nigeria-reveal-community-transmission-multiple-virus-lineages-and-spike-protein-mutation-associated-with-higher-transmission-and-pathogenicity/494">https://virological.org/t/sars-cov-2-genomes-from-nigeria-reveal-community-transmission-multiple-virus-lineages-and-spike-protein-mutation-associated-with-higher-transmission-and-pathogenicity/494</a> ) |
| Nigeria/OY008-CV29/2020          | EPI_ISL_455429 | Nigeria Centre for Disease Control (NCDC)                                                                                                                                                                                                                    | African Centre of Excellence for Genomics of Infectious Diseases (ACEGID), Redeemer's University, Ede, Osun State, Nigeria | 2020-03-27 | Tanya Curran et al ( <a href="https://virological.org/t/sars-cov-2-genomes-from-nigeria-reveal-community-transmission-multiple-virus-lineages-and-spike-protein-mutation-associated-with-higher-transmission-and-pathogenicity/494">https://virological.org/t/sars-cov-2-genomes-from-nigeria-reveal-community-transmission-multiple-virus-lineages-and-spike-protein-mutation-associated-with-higher-transmission-and-pathogenicity/494</a> )  |
| NorthernIreland/HSCN01/2020      | EPI_ISL_414949 | Regional Virus Laboratory, Belfast                                                                                                                                                                                                                           | Public Health Wales Microbiology Cardiff                                                                                   | 2020-02-26 | Welcome Sanger Institute for the COVID-19 Genomics UK Consortium                                                                                                                                                                                                                                                                                                                                                                                |
| NorthernIreland/NIRE-FA6AD/2020  | EPI_ISL_455993 | Regional Virus Laboratory, Belfast Health and Social Care Trust                                                                                                                                                                                              | Welcome Sanger Institute for the COVID-19 Genomics UK Consortium                                                           | 2020-04-06 | Conall McCaughey et al A                                                                                                                                                                                                                                                                                                                                                                                                                        |
| NorthernIreland/NIRE-FAE4B/2020  | EPI_ISL_448928 | Regional Virus Laboratory, Belfast Health and Social Care Trust                                                                                                                                                                                              | COVID-19 Genomics UK (COG-UK) Consortium                                                                                   | 2020-03-26 | Conall McCaughey et al B ( <a href="https://virological.org/t/preliminary-analysis-of-sars-cov-2-importation-establishment-of-uk-transmission-lineages/507">https://virological.org/t/preliminary-analysis-of-sars-cov-2-importation-establishment-of-uk-transmission-lineages/507</a> )                                                                                                                                                        |
| NorthernIreland/NIRE-FB105/2020  | EPI_ISL_470026 | Regional Virus Laboratory, Belfast Health and Social Care Trust                                                                                                                                                                                              | COVID-19 Genomics UK (COG-UK) Consortium                                                                                   | 2020-04-07 | Conall McCaughey et al A                                                                                                                                                                                                                                                                                                                                                                                                                        |
| NorthernIreland/NIRE-FB77C/2020  | EPI_ISL_448976 | Regional Virus Laboratory, Belfast Health and Social Care Trust                                                                                                                                                                                              | COVID-19 Genomics UK (COG-UK) Consortium                                                                                   | 2020-03-25 | Conall McCaughey et al B ( <a href="https://virological.org/t/preliminary-analysis-of-sars-cov-2-importation-establishment-of-uk-transmission-lineages/507">https://virological.org/t/preliminary-analysis-of-sars-cov-2-importation-establishment-of-uk-transmission-lineages/507</a> )                                                                                                                                                        |
| Norway/1380/2020                 | EPI_ISL_417484 | Oslo University Hospital, Department of Medical Microbiology and Infectious Disease Control                                                                                                                                                                  | Norwegian Institute of Public Health, Department of Virology                                                               | 2020-02-28 | Kathrine Stene-Johansen et al                                                                                                                                                                                                                                                                                                                                                                                                                   |
| Norway/1495/2020                 | EPI_ISL_420134 | Akershus University Hospital, Department of Microbiology and Infectious Disease Control                                                                                                                                                                      | Norwegian Institute of Public Health, Department of Virology                                                               | 2020-02-28 | Kathrine Stene-Johansen et al                                                                                                                                                                                                                                                                                                                                                                                                                   |
| Norway/1526/2020                 | EPI_ISL_417485 | University Hospital of Northern Norway, Department of Microbiology and Infectious Disease Control                                                                                                                                                            | Norwegian Institute of Public Health, Department of Virology                                                               | 2020-03-02 | Kathrine Stene-Johansen et al                                                                                                                                                                                                                                                                                                                                                                                                                   |
| Norway/1781/2020                 | EPI_ISL_420138 | University Hospital of Northern Norway, Department of Microbiology and Infectious Disease Control                                                                                                                                                            | Norwegian Institute of Public Health, Department of Virology                                                               | 2020-03-05 | Kathrine Stene-Johansen et al                                                                                                                                                                                                                                                                                                                                                                                                                   |
| Norway/1867/2020                 | EPI_ISL_420141 | Furst Medical Laboratory                                                                                                                                                                                                                                     | Norwegian Institute of Public Health, Department of Virology                                                               | 2020-03-10 | Kathrine Stene-Johansen et al                                                                                                                                                                                                                                                                                                                                                                                                                   |
| Norway/1917/2020                 | EPI_ISL_420143 | Unilabs Laboratory Medicine                                                                                                                                                                                                                                  | Norwegian Institute of Public Health, Department of Virology                                                               | 2020-03-10 | Kathrine Stene-Johansen et al                                                                                                                                                                                                                                                                                                                                                                                                                   |
| Norway/1949/2020                 | EPI_ISL_470882 | Foedse Hospital, Department of Microbiology                                                                                                                                                                                                                  | Norwegian Institute of Public Health, Department of Virology                                                               | 2020-03-09 | Kathrine Stene-Johansen et al                                                                                                                                                                                                                                                                                                                                                                                                                   |

|                          |                |                                                                                                                                                                                                                                      |                                                                                                                                                                                                                                      |            |                                                                                                                                               |
|--------------------------|----------------|--------------------------------------------------------------------------------------------------------------------------------------------------------------------------------------------------------------------------------------|--------------------------------------------------------------------------------------------------------------------------------------------------------------------------------------------------------------------------------------|------------|-----------------------------------------------------------------------------------------------------------------------------------------------|
| Norway/19512020          | EPI_ISL_420145 | Forde Hospital Department of Microbiology                                                                                                                                                                                            | Norwegian Institute of Public Health, Department of Virology                                                                                                                                                                         | 2020-03-09 | Kathrine Stene-Johansen et al                                                                                                                 |
| Norway/19532020          | EPI_ISL_420313 | Furud Medical Laboratory                                                                                                                                                                                                             | Norwegian Institute of Public Health, Department of Virology                                                                                                                                                                         | 2020-03-10 | Kathrine Stene-Johansen et al                                                                                                                 |
| Norway/19892020          | EPI_ISL_420147 | Hospital of Southern Norway - Kristiansand, Department of Medical Microbiology                                                                                                                                                       | Norwegian Institute of Public Health, Department of Virology                                                                                                                                                                         | 2020-03-10 | Kathrine Stene-Johansen et al                                                                                                                 |
| Norway/20652020          | EPI_ISL_420149 | Stavanger University Hospital, Department of Medical Microbiology                                                                                                                                                                    | Norwegian Institute of Public Health, Department of Virology                                                                                                                                                                         | 2020-03-09 | Kathrine Stene-Johansen et al                                                                                                                 |
| Norway/20842020          | EPI_ISL_420150 | Oslo University Hospital, Department of Medical Microbiology                                                                                                                                                                         | Norwegian Institute of Public Health, Department of Virology                                                                                                                                                                         | 2020-03-09 | Kathrine Stene-Johansen et al                                                                                                                 |
| Norway/20872020          | EPI_ISL_420151 | Nordland Hospital - Bodø, Laboratory Department, Molecular Biology Unit                                                                                                                                                              | Norwegian Institute of Public Health, Department of Virology                                                                                                                                                                         | 2020-03-17 | Kathrine Stene-Johansen et al                                                                                                                 |
| Norway/20882020          | EPI_ISL_420152 | University Hospital of Northern Norway, Department for Microbiology and Infectious Disease Control                                                                                                                                   | Norwegian Institute of Public Health, Department of Virology                                                                                                                                                                         | 2020-03-17 | Kathrine Stene-Johansen et al                                                                                                                 |
| Norway/20902020          | EPI_ISL_420153 | University Hospital of Northern Norway, Department for Microbiology and Infectious Disease Control                                                                                                                                   | Norwegian Institute of Public Health, Department of Virology                                                                                                                                                                         | 2020-03-16 | Kathrine Stene-Johansen et al                                                                                                                 |
| Norway/20932020          | EPI_ISL_420310 | Akershus University Hospital, Department for Microbiology and Infectious Disease Control                                                                                                                                             | Norwegian Institute of Public Health, Department of Virology                                                                                                                                                                         | 2020-03-16 | Kathrine Stene-Johansen et al                                                                                                                 |
| Norway/21132020          | EPI_ISL_420311 | Akershus University Hospital, Department for Microbiology and Infectious Disease Control                                                                                                                                             | Norwegian Institute of Public Health, Department of Virology                                                                                                                                                                         | 2020-03-18 | Kathrine Stene-Johansen et al                                                                                                                 |
| Norway/21142020          | EPI_ISL_420312 | Akershus University Hospital, Department for Microbiology and Infectious Disease Control                                                                                                                                             | Norwegian Institute of Public Health, Department of Virology                                                                                                                                                                         | 2020-03-18 | Kathrine Stene-Johansen et al                                                                                                                 |
| Norway/22002020          | EPI_ISL_448737 | Dept. of Medical Microbiology, Stavanger University Hospital, Helse Stavanger HF                                                                                                                                                     | Norwegian Institute of Public Health, Department of Virology                                                                                                                                                                         | 2020-03-20 | Kathrine Stene-Johansen et al                                                                                                                 |
| Norway/22442020          | EPI_ISL_448738 | Medical Microbiology Unit, Department for Laboratory Medicine, Dittmann Hospital, Vestre Viken Health Trust                                                                                                                          | Norwegian Institute of Public Health, Department of Virology                                                                                                                                                                         | 2020-03-23 | Kathrine Stene-Johansen et al                                                                                                                 |
| Norway/22462020          | EPI_ISL_448739 | Medical Microbiology Unit, Department for Laboratory Medicine, Dittmann Hospital, Vestre Viken Health Trust                                                                                                                          | Norwegian Institute of Public Health, Department of Virology                                                                                                                                                                         | 2020-03-24 | Kathrine Stene-Johansen et al                                                                                                                 |
| Norway/2356-2/2020       | EPI_ISL_449786 | Osland Hospital Trust - Kviteseid, Centre for Laboratory Medicine, Section for gene technology and infection serology                                                                                                                | Norwegian Institute of Public Health, Department of Virology                                                                                                                                                                         | 2020-04-08 | Kathrine Stene-Johansen et al                                                                                                                 |
| Norway/23802020          | EPI_ISL_449787 | Furud Medical Laboratory                                                                                                                                                                                                             | Norwegian Institute of Public Health, Department of Virology                                                                                                                                                                         | 2020-04-12 | Kathrine Stene-Johansen et al                                                                                                                 |
| Norway/23812020          | EPI_ISL_449788 | Furud Medical Laboratory                                                                                                                                                                                                             | Norwegian Institute of Public Health, Department of Virology                                                                                                                                                                         | 2020-04-11 | Kathrine Stene-Johansen et al                                                                                                                 |
| Norway/23822020          | EPI_ISL_449789 | Dept. of Medical Microbiology, Stavanger University Hospital, Helse Stavanger HF                                                                                                                                                     | Norwegian Institute of Public Health, Department of Virology                                                                                                                                                                         | 2020-03-30 | Kathrine Stene-Johansen et al                                                                                                                 |
| Norway/23832020          | EPI_ISL_449790 | Dept. of Medical Microbiology, Stavanger University Hospital, Helse Stavanger HF                                                                                                                                                     | Norwegian Institute of Public Health, Department of Virology                                                                                                                                                                         | 2020-04-01 | Kathrine Stene-Johansen et al                                                                                                                 |
| Norway/23862020          | EPI_ISL_449791 | Dept. of Medical Microbiology, Stavanger University Hospital, Helse Stavanger HF                                                                                                                                                     | Norwegian Institute of Public Health, Department of Virology                                                                                                                                                                         | 2020-04-04 | Kathrine Stene-Johansen et al                                                                                                                 |
| Norway/23872020          | EPI_ISL_449792 | Dept. of Medical Microbiology, Stavanger University Hospital, Helse Stavanger HF                                                                                                                                                     | Norwegian Institute of Public Health, Department of Virology                                                                                                                                                                         | 2020-04-05 | Kathrine Stene-Johansen et al                                                                                                                 |
| Norway/23882020          | EPI_ISL_449793 | Dept. of Medical Microbiology, Stavanger University Hospital, Helse Stavanger HF                                                                                                                                                     | Norwegian Institute of Public Health, Department of Virology                                                                                                                                                                         | 2020-04-02 | Kathrine Stene-Johansen et al                                                                                                                 |
| Norway/23902020          | EPI_ISL_449794 | Dept. of Medical Microbiology, Stavanger University Hospital, Helse Stavanger HF                                                                                                                                                     | Norwegian Institute of Public Health, Department of Virology                                                                                                                                                                         | 2020-04-02 | Kathrine Stene-Johansen et al                                                                                                                 |
| Norway/Tromheim-E10/2020 | EPI_ISL_450352 | St.Olavs hospital/NTNU                                                                                                                                                                                                               | Institute of Genomics Core Facility, University of Tartu                                                                                                                                                                             | 2020-03-11 | Aleksandr Ivanovskiy et al                                                                                                                    |
| Norway/Tromheim-E9/2020  | EPI_ISL_450351 | St.Olavs hospital/NTNU                                                                                                                                                                                                               | Institute of Genomics Core Facility, University of Tartu                                                                                                                                                                             | 2020-03-11 | Aleksandr Ivanovskiy et al                                                                                                                    |
| Norway/Tromheim-S10/2020 | EPI_ISL_450348 | St.Olavs hospital/NTNU                                                                                                                                                                                                               | Institute of Genomics Core Facility, University of Tartu                                                                                                                                                                             | 2020-03-24 | Aleksandr Ivanovskiy et al                                                                                                                    |
| Norway/Tromheim-S12/2020 | EPI_ISL_450349 | St.Olavs hospital/NTNU                                                                                                                                                                                                               | Institute of Genomics Core Facility, University of Tartu                                                                                                                                                                             | 2020-03-29 | Aleksandr Ivanovskiy et al                                                                                                                    |
| Norway/Tromheim-S15/2020 | EPI_ISL_450350 | St.Olavs hospital/NTNU                                                                                                                                                                                                               | Institute of Genomics Core Facility, University of Tartu                                                                                                                                                                             | 2020-03-28 | Aleksandr Ivanovskiy et al                                                                                                                    |
| Norway/Tromheim-S4/2020  | EPI_ISL_450346 | St.Olavs hospital/NTNU                                                                                                                                                                                                               | Institute of Genomics Core Facility, University of Tartu                                                                                                                                                                             | 2020-03-25 | Aleksandr Ivanovskiy et al                                                                                                                    |
| Norway/Tromheim-S5/2020  | EPI_ISL_450347 | St.Olavs hospital/NTNU                                                                                                                                                                                                               | Institute of Genomics Core Facility, University of Tartu                                                                                                                                                                             | 2020-03-25 | Aleksandr Ivanovskiy et al                                                                                                                    |
| Oman/205024076/2020      | EPI_ISL_457707 | Oman-NIC                                                                                                                                                                                                                             | Department of Microbiology and Immunology-SQUH                                                                                                                                                                                       | 2020-03-24 | Fahad Zaidji et al                                                                                                                            |
| Oman/205024123/2020      | EPI_ISL_457703 | Oman-NIC                                                                                                                                                                                                                             | Department of Microbiology and Immunology-SQUH                                                                                                                                                                                       | 2020-03-25 | Fahad Zaidji et al                                                                                                                            |
| Oman/205026388/2020      | EPI_ISL_457981 | Oman-NIC                                                                                                                                                                                                                             | Department of Microbiology and Immunology-SQUH                                                                                                                                                                                       | 2020-04-03 | Fahad Zaidji et al                                                                                                                            |
| Oman/205026721/2020      | EPI_ISL_458127 | Oman National Influenza Centre                                                                                                                                                                                                       | Department of Microbiology and Immunology-SQUH                                                                                                                                                                                       | 2020-04-05 | Fahad Zaidji et al                                                                                                                            |
| Oman/205027285/2020      | EPI_ISL_458122 | Oman National Influenza Centre                                                                                                                                                                                                       | Department of Microbiology and Immunology-SQUH                                                                                                                                                                                       | 2020-04-07 | Fahad Zaidji et al                                                                                                                            |
| Oman/205027556/2020      | EPI_ISL_458125 | Oman National Influenza Centre                                                                                                                                                                                                       | Department of Microbiology and Immunology-SQUH                                                                                                                                                                                       | 2020-04-08 | Fahad Zaidji et al                                                                                                                            |
| Oman/205028472/2020      | EPI_ISL_458119 | Oman National Influenza Centre                                                                                                                                                                                                       | Department of Microbiology and Immunology-SQUH                                                                                                                                                                                       | 2020-04-11 | Fahad Zaidji et al                                                                                                                            |
| Oman/205028718/2020      | EPI_ISL_458120 | Oman-NIC                                                                                                                                                                                                                             | Microbiology laboratory- Sultan Qaboos University Hospital                                                                                                                                                                           | 2020-04-12 | Fahad Zaidji et al                                                                                                                            |
| Oman/205028997/2020      | EPI_ISL_458120 | Oman National Influenza Centre                                                                                                                                                                                                       | Department of Microbiology and Immunology-SQUH                                                                                                                                                                                       | 2020-04-13 | Fahad Zaidji et al                                                                                                                            |
| Oman/205029065/2020      | EPI_ISL_457982 | Oman-NIC                                                                                                                                                                                                                             | Department of Microbiology and Immunology-SQUH                                                                                                                                                                                       | 2020-04-13 | Fahad Zaidji et al                                                                                                                            |
| Oman/205030448/2020      | EPI_ISL_458121 | Oman National Influenza Centre                                                                                                                                                                                                       | Department of Microbiology and Immunology-SQUH                                                                                                                                                                                       | 2020-04-20 | Fahad Zaidji et al                                                                                                                            |
| Oman/205031572/2020      | EPI_ISL_458126 | Oman National Influenza Centre                                                                                                                                                                                                       | Department of Microbiology and Immunology-SQUH                                                                                                                                                                                       | 2020-04-25 | Fahad Zaidji et al                                                                                                                            |
| Oman/205032386/2020      | EPI_ISL_457984 | Oman-NIC                                                                                                                                                                                                                             | Department of Microbiology and Immunology-SQUH                                                                                                                                                                                       | 2020-04-28 | Fahad Zaidji et al                                                                                                                            |
| Oman/205033010/2020      | EPI_ISL_458118 | Oman National Influenza Centre                                                                                                                                                                                                       | Department of Microbiology and Immunology-SQUH                                                                                                                                                                                       | 2020-05-01 | Fahad Zaidji et al                                                                                                                            |
| Oman/205033013/2020      | EPI_ISL_458116 | Oman National Influenza Centre                                                                                                                                                                                                       | Department of Microbiology and Immunology-SQUH                                                                                                                                                                                       | 2020-05-01 | Fahad Zaidji et al                                                                                                                            |
| Oman/205033293/2020      | EPI_ISL_457983 | Oman-NIC                                                                                                                                                                                                                             | Department of Microbiology and Immunology-SQUH                                                                                                                                                                                       | 2020-05-03 | Fahad Zaidji et al                                                                                                                            |
| Oman/205034466/2020      | EPI_ISL_457705 | OMAN-NIC                                                                                                                                                                                                                             | Department of Microbiology and Immunology-SQUH                                                                                                                                                                                       | 2020-05-08 | Fahad Zaidji et al                                                                                                                            |
| Oman/205034603/2020      | EPI_ISL_458117 | Oman National Influenza Centre                                                                                                                                                                                                       | Department of Microbiology and Immunology-SQUH                                                                                                                                                                                       | 2020-05-09 | Fahad Zaidji et al                                                                                                                            |
| Oman/RESP-20-1189/2020   | EPI_ISL_457706 | Oman-NIC                                                                                                                                                                                                                             | Oman-NIC                                                                                                                                                                                                                             | 2020-03-02 | Samina Al-Maroufi et al                                                                                                                       |
| Oman/RESP-20-1857/2020   | EPI_ISL_457937 | Oman-NIC                                                                                                                                                                                                                             | Oman-NIC                                                                                                                                                                                                                             | 2020-03-15 | Samina Al-Maroufi et al                                                                                                                       |
| Oman/RESP-20-1976/2020   | EPI_ISL_457938 | Oman-NIC                                                                                                                                                                                                                             | Oman-NIC                                                                                                                                                                                                                             | 2020-03-15 | Samina Al-Maroufi et al                                                                                                                       |
| Oman/RESP-20-2181/2020   | EPI_ISL_457939 | Oman-NIC                                                                                                                                                                                                                             | Oman-NIC                                                                                                                                                                                                                             | 2020-03-17 | Samina Al-Maroufi et al                                                                                                                       |
| Oman/RESP-20-2282/2020   | EPI_ISL_457974 | Oman-NIC                                                                                                                                                                                                                             | Oman-NIC                                                                                                                                                                                                                             | 2020-03-14 | Samina Al-Maroufi et al                                                                                                                       |
| Oman/RESP-20-2523/2020   | EPI_ISL_457975 | Oman-NIC                                                                                                                                                                                                                             | Oman-NIC                                                                                                                                                                                                                             | 2020-03-17 | Samina Al-Maroufi et al                                                                                                                       |
| Oman/RESP-20-2631/2020   | EPI_ISL_457976 | Oman-NIC                                                                                                                                                                                                                             | Oman-NIC                                                                                                                                                                                                                             | 2020-03-17 | Samina Al-Maroufi et al                                                                                                                       |
| Oman/RESP-20-2850/2020   | EPI_ISL_457977 | Oman-NIC                                                                                                                                                                                                                             | Oman-NIC                                                                                                                                                                                                                             | 2020-03-18 | Samina Al-Maroufi et al                                                                                                                       |
| Oman/RESP-20-2857/2020   | EPI_ISL_457978 | Oman-NIC                                                                                                                                                                                                                             | Oman-NIC                                                                                                                                                                                                                             | 2020-03-18 | Samina Al-Maroufi et al                                                                                                                       |
| Oman/RESP-20-3080/2020   | EPI_ISL_457979 | Oman-NIC                                                                                                                                                                                                                             | Oman-NIC                                                                                                                                                                                                                             | 2020-03-18 | Samina Al-Maroufi et al                                                                                                                       |
| Oman/RESP-20-3343/2020   | EPI_ISL_457985 | Oman-NIC                                                                                                                                                                                                                             | Oman-NIC                                                                                                                                                                                                                             | 2020-03-18 | Samina Al-Maroufi et al                                                                                                                       |
| Oman/RESP-20-3515/2020   | EPI_ISL_457980 | Oman-NIC                                                                                                                                                                                                                             | Oman-NIC                                                                                                                                                                                                                             | 2020-03-18 | Samina Al-Maroufi et al                                                                                                                       |
| Oman/RESP-20-3700/2020   | EPI_ISL_457986 | Oman-NIC                                                                                                                                                                                                                             | Oman-NIC                                                                                                                                                                                                                             | 2020-03-20 | Samina Al-Maroufi et al                                                                                                                       |
| Oman/RESP-20-4153/2020   | EPI_ISL_457988 | Oman-NIC                                                                                                                                                                                                                             | Oman-NIC                                                                                                                                                                                                                             | 2020-03-21 | Samina Al-Maroufi et al                                                                                                                       |
| Oman/RESP-20-4252/2020   | EPI_ISL_457989 | Oman-NIC                                                                                                                                                                                                                             | Oman-NIC                                                                                                                                                                                                                             | 2020-03-21 | Samina Al-Maroufi et al                                                                                                                       |
| Oman/RESP-20-4736/2020   | EPI_ISL_457991 | Oman-NIC                                                                                                                                                                                                                             | Oman-NIC                                                                                                                                                                                                                             | 2020-03-22 | Samina Al-Maroufi et al                                                                                                                       |
| Oman/RESP-20-4810/2020   | EPI_ISL_457992 | Oman-NIC                                                                                                                                                                                                                             | Oman-NIC                                                                                                                                                                                                                             | 2020-03-22 | Samina Al-Maroufi et al                                                                                                                       |
| Oman/RESP-20-5414/2020   | EPI_ISL_457993 | Oman-NIC                                                                                                                                                                                                                             | Oman-NIC                                                                                                                                                                                                                             | 2020-03-24 | Samina Al-Maroufi et al                                                                                                                       |
| Oman/RESP-20-5505/2020   | EPI_ISL_457994 | Oman-NIC                                                                                                                                                                                                                             | Oman-NIC                                                                                                                                                                                                                             | 2020-03-25 | Samina Al-Maroufi et al                                                                                                                       |
| Oman/RESP-20-6417/2020   | EPI_ISL_457996 | Oman-NIC                                                                                                                                                                                                                             | Oman-NIC                                                                                                                                                                                                                             | 2020-03-29 | Samina Al-Maroufi et al                                                                                                                       |
| Oman/RESP-20-6560/2020   | EPI_ISL_457997 | Oman-NIC                                                                                                                                                                                                                             | Oman-NIC                                                                                                                                                                                                                             | 2020-03-28 | Samina Al-Maroufi et al                                                                                                                       |
| Oman/RESP-20-6701/2020   | EPI_ISL_457998 | Oman-NIC                                                                                                                                                                                                                             | Oman-NIC                                                                                                                                                                                                                             | 2020-03-28 | Samina Al-Maroufi et al                                                                                                                       |
| Oman/RESP-20-7917/2020   | EPI_ISL_457701 | Oman-NIC                                                                                                                                                                                                                             | Oman-NIC                                                                                                                                                                                                                             | 2020-03-28 | Samina Al-Maroufi et al                                                                                                                       |
| Oman/RESP-20-8377/2020   | EPI_ISL_457704 | Oman-NIC                                                                                                                                                                                                                             | Oman-NIC                                                                                                                                                                                                                             | 2020-03-23 | Samina Al-Maroufi et al                                                                                                                       |
| Pakistan/Gligri/2020     | EPI_ISL_417444 | Oman-NIC                                                                                                                                                                                                                             | Oman-NIC                                                                                                                                                                                                                             | 2020-03-24 | Samina Al-Maroufi et al                                                                                                                       |
| Pakistan/KH1/2020        | EPI_ISL_451958 | Department of Healthcare Biotechnology                                                                                                                                                                                               | Department of Healthcare Biotechnology                                                                                                                                                                                               | 2020-03-04 | Javed et al ( <a href="http://biorxiv.org/lookup/doi/10.1101/2020.04.01.019483">http://biorxiv.org/lookup/doi/10.1101/2020.04.01.019483</a> ) |
| Pakistan/NH-4495/2020    | EPI_ISL_468159 | Jamshaur-Rabban Center for Genome Research                                                                                                                                                                                           | Department of Virology, Public Health Laboratories Division, National Institute of Health                                                                                                                                            | 2020-03-16 | Shakeel et al                                                                                                                                 |
| Pakistan/NH-45090/2020   | EPI_ISL_468161 | Department of Virology, Public Health Laboratories Division, National Institute of Health                                                                                                                                            | Department of Virology, Public Health Laboratories Division, National Institute of Health                                                                                                                                            | 2020-06-02 | Massab Umair et al                                                                                                                            |
| Pakistan/NH-45143/2020   | EPI_ISL_468160 | Department of Virology, Public Health Laboratories Division, National Institute of Health                                                                                                                                            | Department of Virology, Public Health Laboratories Division, National Institute of Health                                                                                                                                            | 2020-06-02 | Massab Umair et al                                                                                                                            |
| Pakistan/NH-45579/2020   | EPI_ISL_468162 | Department of Virology, Public Health Laboratories Division, National Institute of Health                                                                                                                                            | Department of Virology, Public Health Laboratories Division, National Institute of Health                                                                                                                                            | 2020-06-02 | Massab Umair et al                                                                                                                            |
| Pakistan/NH-HAS001/2020  | EPI_ISL_468163 | Department of Virology, Public Health Laboratories Division, National Institute of Health                                                                                                                                            | Department of Virology, Public Health Laboratories Division, National Institute of Health                                                                                                                                            | 2020-06-02 | Massab Umair et al                                                                                                                            |
| Panamá/328677/2020       | EPI_ISL_415152 | Gorgas Memorial Institute for Health Studies                                                                                                                                                                                         | Gorgas Memorial Institute for Health Studies                                                                                                                                                                                         | 2020-03-06 | Daniilo Franco et al                                                                                                                          |
| Peru/10/2020             | EPI_ISL_415787 | Laboratorio de Referencia Nacional de Virus Respiratorio, Instituto Nacional de Salud, Peru                                                                                                                                          | Laboratorio de Referencia Nacional de Biotecnología y Biología Molecular, Instituto Nacional de Salud, Peru                                                                                                                          | 2020-03-10 | Carlos Padilla Rojas et al ( <a href="https://doi.org/10.1101/2020.05.23.20111443">https://doi.org/10.1101/2020.05.23.20111443</a> )          |
| Philippines/PGC01/2020   | EPI_ISL_434833 | National Institutes of Health, University of the Philippines Manila                                                                                                                                                                  | Philippine Genome Center, University of the Philippines System                                                                                                                                                                       | 2020-03-22 | Carlo M. Lapid et al                                                                                                                          |
| Philippines/PGC02/2020   | EPI_ISL_434554 | National Institutes of Health, University of the Philippines Manila                                                                                                                                                                  | Philippine Genome Center                                                                                                                                                                                                             | 2020-03-26 | Carlo M. Lapid et al                                                                                                                          |
| Philippines/PGC03/2020   | EPI_ISL_434555 | National Institutes of Health, University of the Philippines Manila                                                                                                                                                                  | Philippine Genome Center                                                                                                                                                                                                             | 2020-03-26 | Carlo M. Lapid et al                                                                                                                          |
| Philippines/PGC04/2020   | EPI_ISL_434556 | National Institutes of Health, University of the Philippines Manila                                                                                                                                                                  | Philippine Genome Center                                                                                                                                                                                                             | 2020-03-26 | Carlo M. Lapid et al                                                                                                                          |
| Philippines/PGC05/2020   | EPI_ISL_434557 | National Institutes of Health, University of the Philippines Manila                                                                                                                                                                  | Philippine Genome Center                                                                                                                                                                                                             | 2020-03-27 | Carlo M. Lapid et al                                                                                                                          |
| Philippines/PGC06/2020   | EPI_ISL_434558 | National Institutes of Health, University of the Philippines Manila                                                                                                                                                                  | Philippine Genome Center                                                                                                                                                                                                             | 2020-03-28 | Carlo M. Lapid et al                                                                                                                          |
| Philippines/RTM-03/2020  | EPI_ISL_435046 | Rical Medical Center                                                                                                                                                                                                                 | Research Institute for Tropical Medicine                                                                                                                                                                                             | 2020-03-21 | Medardo et al                                                                                                                                 |
| Philippines/RTM-04/2020  | EPI_ISL_435048 | Veterans Memorial Medical Center                                                                                                                                                                                                     | Research Institute for Tropical Medicine                                                                                                                                                                                             | 2020-03-08 | Medardo et al                                                                                                                                 |
| Philippines/RTM-07/2020  | EPI_ISL_435045 | Paigay City General Hospital                                                                                                                                                                                                         | Research Institute for Tropical Medicine                                                                                                                                                                                             | 2020-03-23 | Medardo et al                                                                                                                                 |
| Poland/1104795/2020      | EPI_ISL_428232 | Hematology Laboratory, Section of Molecular Diagnostics, University Clinical Centre, Medical University of Gdansk                                                                                                                    | Department of Virology, Faculty of Medicine, University of Helsinki, Helsinki, Finland                                                                                                                                               | 2020-03-18 | Mariena Rotkowska et al                                                                                                                       |
| Poland/1105644/2020      | EPI_ISL_428233 | Hematology Laboratory, Section of Molecular Diagnostics, University Clinical Centre, Medical University of Gdansk                                                                                                                    | Department of Virology, Faculty of Medicine, University of Helsinki, Helsinki, Finland                                                                                                                                               | 2020-03-18 | Mariena Rotkowska et al                                                                                                                       |
| Poland/1105973/2020      | EPI_ISL_428234 | Hematology Laboratory, Section of Molecular Diagnostics, University Clinical Centre, Medical University of Gdansk                                                                                                                    | Department of Virology, Faculty of Medicine, University of Helsinki, Helsinki, Finland                                                                                                                                               | 2020-03-19 | Mariena Rotkowska et al                                                                                                                       |
| Poland/1107355/2020      | EPI_ISL_428235 | Hematology Laboratory, Section of Molecular Diagnostics, University Clinical Centre, Medical University of Gdansk                                                                                                                    | Department of Virology, Faculty of Medicine, University of Helsinki, Helsinki, Finland                                                                                                                                               | 2020-03-23 | Mariena Rotkowska et al                                                                                                                       |
| Poland/1109171/2020      | EPI_ISL_428236 | Hematology Laboratory, Section of Molecular Diagnostics, University Clinical Centre, Medical University of Gdansk                                                                                                                    | Department of Virology, Faculty of Medicine, University of Helsinki, Helsinki, Finland                                                                                                                                               | 2020-03-27 | Mariena Rotkowska et al                                                                                                                       |
| Poland/1109201/2020      | EPI_ISL_450525 | Hematology Laboratory, Section of Molecular Diagnostics, University Clinical Centre, Medical University of Gdansk                                                                                                                    | Department of Virology, Faculty of Medicine, University of Helsinki, Helsinki, Finland                                                                                                                                               | 2020-03-28 | Maciej Gryzbek et al                                                                                                                          |
| Poland/1110540/2020      | EPI_ISL_450528 | Hematology Laboratory, Section of Molecular Diagnostics, University Clinical Centre, Medical University of Gdansk                                                                                                                    | Department of Virology, Faculty of Medicine, University of Helsinki, Helsinki, Finland                                                                                                                                               | 2020-03-30 | Maciej Gryzbek et al                                                                                                                          |
| Poland/1110551/2020      | EPI_ISL_450527 | Hematology Laboratory, Section of Molecular Diagnostics, University Clinical Centre, Medical University of Gdansk                                                                                                                    | Department of Virology, Faculty of Medicine, University of Helsinki, Helsinki, Finland                                                                                                                                               | 2020-03-29 | Maciej Gryzbek et al                                                                                                                          |
| Poland/111628/2020       | EPI_ISL_450530 | Hematology Laboratory, Section of Molecular Diagnostics, University Clinical Centre, Medical University of Gdansk                                                                                                                    | Department of Virology, Faculty of Medicine, University of Helsinki, Helsinki, Finland                                                                                                                                               | 2020-04-01 | Maciej Gryzbek et al                                                                                                                          |
| Poland/IMG_PAS_1_69/2020 | EPI_ISL_450294 | Institute of Human Genetics, Polish Academy of Sciences, Sanitary and Epidemiological Station in Poznan                                                                                                                              | Institute of Human Genetics, Polish Academy of Sciences                                                                                                                                                                              | 2020-04-11 | Szymon Hryhorowicz et al                                                                                                                      |
| Poland/IMG_PAS_1_73/2020 | EPI_ISL_450295 | Institute of Human Genetics, Polish Academy of Sciences, Sanitary and Epidemiological Station in Poznan                                                                                                                              | Institute of Human Genetics, Polish Academy of Sciences                                                                                                                                                                              | 2020-04-11 | Szymon Hryhorowicz et al                                                                                                                      |
| Poland/IMG_PAS_1_77/2020 | EPI_ISL_450338 | Institute of Human Genetics, Polish Academy of Sciences, Sanitary and Epidemiological Station in Poznan                                                                                                                              | Institute of Human Genetics, Polish Academy of Sciences                                                                                                                                                                              | 2020-04-11 | Szymon Hryhorowicz et al                                                                                                                      |
| Poland/IMG_PAS_3_57/2020 | EPI_ISL_462480 | Institute of Human Genetics, Polish Academy of Sciences                                                                                                                                                                              | Institute of Human Genetics, Polish Academy of Sciences                                                                                                                                                                              | 2020-05-13 | Szymon Hryhorowicz et al                                                                                                                      |
| Poland/PL_P1/2020        | EPI_ISL_414688 | ViroGenetica - BSLS Laboratory of Virology, Human Genome Variation Research Group & Genomics Centre MCB, Bioinformatics Research Group Department of Virology                                                                        | ViroGenetica - BSLS Laboratory of Virology, Human Genome Variation Research Group & Genomics Centre MCB, Bioinformatics Research Group Department of Virology                                                                        | 2020-03-03 | Aleksandra Miewska et al                                                                                                                      |
| Poland/PL_P10/2020       | EPI_ISL_451971 | 1. ViroGenetica - BSLS Laboratory of Virology, Malopolska Centre of Biotechnology, Jagiellonian University, 2. II Department of Internal Medicine, Faculty of Medicine, Jagiellonian University Medical College, 3. DIAGNOSTYKA Ltd. | 1. ViroGenetica - BSLS Laboratory of Virology, Malopolska Centre of Biotechnology, Jagiellonian University, 2. II Department of Internal Medicine, Faculty of Medicine, Jagiellonian University Medical College, 3. DIAGNOSTYKA Ltd. | 2020-04-01 | Marek Sanak et al                                                                                                                             |
| Poland/PL_P11/2020       | EPI_ISL_451972 | 1. ViroGenetica - BSLS Laboratory of Virology, Malopolska Centre of Biotechnology, Jagiellonian University, 2. II Department of Internal Medicine, Faculty of Medicine, Jagiellonian University Medical College, 3. DIAGNOSTYKA Ltd. | 1. ViroGenetica - BSLS Laboratory of Virology, Malopolska Centre of Biotechnology, Jagiellonian University, 2. II Department of Internal Medicine, Faculty of Medicine, Jagiellonian University Medical College, 3. DIAGNOSTYKA Ltd. | 2020-04-02 | Marek Sanak et al                                                                                                                             |
| Poland/PL_P12/2020       | EPI_ISL_451973 | 1. ViroGenetica - BSLS Laboratory of Virology, Malopolska Centre of Biotechnology, Jagiellonian University, 2. II Department of Internal Medicine, Faculty of Medicine, Jagiellonian University Medical College, 3. DIAGNOSTYKA Ltd. | 1. ViroGenetica - BSLS Laboratory of Virology, Malopolska Centre of Biotechnology, Jagiellonian University, 2. II Department of Internal Medicine, Faculty of Medicine, Jagiellonian University Medical College, 3. DIAGNOSTYKA Ltd. | 2020-03-31 | Marek Sanak et al                                                                                                                             |





|                                      |                |                                                                                                                                                                                                                |            |                         |
|--------------------------------------|----------------|----------------------------------------------------------------------------------------------------------------------------------------------------------------------------------------------------------------|------------|-------------------------|
| Portugal/PT0234/2020                 | EPI_ISL_453948 | Instituto Nacional de Saude (NSA)                                                                                                                                                                              | 2020-03-31 | Borges et al et al      |
| Portugal/PT0237/2020                 | EPI_ISL_453951 | Instituto Nacional de Saude (NSA)                                                                                                                                                                              | 2020-03-31 | Borges et al et al      |
| Portugal/PT0245/2020                 | EPI_ISL_453959 | Instituto Nacional de Saude (NSA)                                                                                                                                                                              | 2020-04-01 | Borges et al et al      |
| Portugal/PT0246/2020                 | EPI_ISL_453960 | Instituto Nacional de Saude (NSA)                                                                                                                                                                              | 2020-04-02 | Borges et al et al      |
| Portugal/PT0249/2020                 | EPI_ISL_453963 | Instituto Nacional de Saude (NSA)                                                                                                                                                                              | 2020-04-02 | Borges et al et al      |
| Portugal/PT0251/2020                 | EPI_ISL_453965 | Instituto Nacional de Saude (NSA)                                                                                                                                                                              | 2020-04-02 | Borges et al et al      |
| Portugal/PT0255/2020                 | EPI_ISL_453969 | Instituto Nacional de Saude (NSA)                                                                                                                                                                              | 2020-04-03 | Borges et al et al      |
| Portugal/PT0261/2020                 | EPI_ISL_453975 | Instituto Nacional de Saude (NSA)                                                                                                                                                                              | 2020-04-03 | Borges et al et al      |
| Portugal/PT0265/2020                 | EPI_ISL_453979 | Instituto Nacional de Saude (NSA)                                                                                                                                                                              | 2020-04-04 | Borges et al et al      |
| Portugal/PT0267/2020                 | EPI_ISL_453981 | Instituto Nacional de Saude (NSA)                                                                                                                                                                              | 2020-04-04 | Borges et al et al      |
| Portugal/PT0270/2020                 | EPI_ISL_453984 | Instituto Nacional de Saude (NSA)                                                                                                                                                                              | 2020-04-05 | Borges et al et al      |
| Portugal/PT0272/2020                 | EPI_ISL_453986 | Instituto Nacional de Saude (NSA)                                                                                                                                                                              | 2020-04-05 | Borges et al et al      |
| Portugal/PT0275/2020                 | EPI_ISL_453989 | Instituto Nacional de Saude (NSA)                                                                                                                                                                              | 2020-04-05 | Borges et al et al      |
| Portugal/PT0277/2020                 | EPI_ISL_453991 | Instituto Nacional de Saude (NSA)                                                                                                                                                                              | 2020-04-05 | Borges et al et al      |
| Portugal/PT0283/2020                 | EPI_ISL_453997 | Instituto Nacional de Saude (NSA)                                                                                                                                                                              | 2020-04-16 | Borges et al et al      |
| Portugal/PT0301/2020                 | EPI_ISL_454017 | Instituto Nacional de Saude (NSA)                                                                                                                                                                              | 2020-03-14 | Borges et al et al      |
| Portugal/PT0322/2020                 | EPI_ISL_454038 | Instituto Nacional de Saude (NSA)                                                                                                                                                                              | 2020-03-16 | Borges et al et al      |
| Portugal/PT0333/2020                 | EPI_ISL_454049 | Instituto Nacional de Saude (NSA)                                                                                                                                                                              | 2020-03-18 | Borges et al et al      |
| Portugal/PT0337/2020                 | EPI_ISL_454053 | Instituto Nacional de Saude (NSA)                                                                                                                                                                              | 2020-03-18 | Borges et al et al      |
| Portugal/PT0356/2020                 | EPI_ISL_454072 | Instituto Nacional de Saude (NSA)                                                                                                                                                                              | 2020-03-19 | Borges et al et al      |
| Portugal/PT0372/2020                 | EPI_ISL_454088 | Instituto Nacional de Saude (NSA)                                                                                                                                                                              | 2020-03-20 | Borges et al et al      |
| Portugal/PT0389/2020                 | EPI_ISL_454107 | Instituto Nacional de Saude (NSA)                                                                                                                                                                              | 2020-03-23 | Borges et al et al      |
| Portugal/PT0430/2020                 | EPI_ISL_454154 | Instituto Nacional de Saude (NSA)                                                                                                                                                                              | 2020-03-31 | Borges et al et al      |
| Portugal/PT0440/2020                 | EPI_ISL_454164 | Instituto Nacional de Saude (NSA)                                                                                                                                                                              | 2020-03-23 | Borges et al et al      |
| Portugal/PT0459/2020                 | EPI_ISL_454183 | Instituto Nacional de Saude (NSA)                                                                                                                                                                              | 2020-04-17 | Borges et al et al      |
| Portugal/PT0465/2020                 | EPI_ISL_454189 | Instituto Nacional de Saude (NSA)                                                                                                                                                                              | 2020-04-18 | Borges et al et al      |
| Portugal/PT0467/2020                 | EPI_ISL_454191 | Instituto Nacional de Saude (NSA)                                                                                                                                                                              | 2020-04-18 | Borges et al et al      |
| Portugal/PT0474/2020                 | EPI_ISL_454198 | Instituto Nacional de Saude (NSA)                                                                                                                                                                              | 2020-04-24 | Borges et al et al      |
| Portugal/PT0476/2020                 | EPI_ISL_454200 | Instituto Nacional de Saude (NSA)                                                                                                                                                                              | 2020-04-24 | Borges et al et al      |
| Portugal/PT0487/2020                 | EPI_ISL_454211 | Instituto Nacional de Saude (NSA)                                                                                                                                                                              | 2020-04-01 | Borges et al et al      |
| Portugal/PT0495/2020                 | EPI_ISL_454219 | Instituto Nacional de Saude (NSA)                                                                                                                                                                              | 2020-04-30 | Borges et al et al      |
| Portugal/PT0497/2020                 | EPI_ISL_454221 | Instituto Nacional de Saude (NSA)                                                                                                                                                                              | 2020-05-01 | Borges et al et al      |
| Portugal/PT0500/2020                 | EPI_ISL_454224 | Instituto Nacional de Saude (NSA)                                                                                                                                                                              | 2020-03-14 | Borges et al et al      |
| Portugal/PT0508/2020                 | EPI_ISL_454232 | Instituto Nacional de Saude (NSA)                                                                                                                                                                              | 2020-03-19 | Borges et al et al      |
| Portugal/PT0531/2020                 | EPI_ISL_454255 | Instituto Nacional de Saude (NSA)                                                                                                                                                                              | 2020-04-07 | Borges et al et al      |
| Portugal/PT0536/2020                 | EPI_ISL_454260 | Instituto Nacional de Saude (NSA)                                                                                                                                                                              | 2020-04-07 | Borges et al et al      |
| Portugal/PT0549/2020                 | EPI_ISL_454272 | Instituto Nacional de Saude (NSA)                                                                                                                                                                              | 2020-05-02 | Borges et al et al      |
| Portugal/PT0552/2020                 | EPI_ISL_454275 | Instituto Nacional de Saude (NSA)                                                                                                                                                                              | 2020-04-07 | Borges et al et al      |
| Portugal/PT0561/2020                 | EPI_ISL_454284 | Instituto Nacional de Saude (NSA)                                                                                                                                                                              | 2020-04-27 | Borges et al et al      |
| Portugal/PT0563/2020                 | EPI_ISL_454286 | Instituto Nacional de Saude (NSA)                                                                                                                                                                              | 2020-05-02 | Borges et al et al      |
| Portugal/PT0575/2020                 | EPI_ISL_454298 | Instituto Nacional de Saude (NSA)                                                                                                                                                                              | 2020-04-11 | Borges et al et al      |
| Portugal/PT0593/2020                 | EPI_ISL_454316 | Instituto Nacional de Saude (NSA)                                                                                                                                                                              | 2020-05-04 | Borges et al et al      |
| Portugal/PT0594/2020                 | EPI_ISL_454317 | Instituto Nacional de Saude (NSA)                                                                                                                                                                              | 2020-04-03 | Borges et al et al      |
| Portugal/PT0601/2020                 | EPI_ISL_454324 | Instituto Nacional de Saude (NSA)                                                                                                                                                                              | 2020-04-06 | Borges et al et al      |
| Portugal/PT0605/2020                 | EPI_ISL_454328 | Instituto Nacional de Saude (NSA)                                                                                                                                                                              | 2020-03-14 | Borges et al et al      |
| Portugal/PT0628/2020                 | EPI_ISL_454351 | Instituto Nacional de Saude (NSA)                                                                                                                                                                              | 2020-04-06 | Borges et al et al      |
| Romania/278406/2020                  | EPI_ISL_445220 | Laboratory for Respiratory Viruses, "Cantacuzino" National Military-Medical Institute for Research and Development                                                                                             | 2020-04-30 | M.Lazar et al           |
| Romania/279067/2020                  | EPI_ISL_445243 | Laboratory for Respiratory Viruses, Cantacuzino National Military-Medical Institute for Research and Development                                                                                               | 2020-04-30 | M.Lazar et al           |
| Romania/279068/2020                  | EPI_ISL_447054 | Laboratory for Respiratory Viruses, Cantacuzino National Military-Medical Institute for Research and Development                                                                                               | 2020-04-30 | M.Lazar et al           |
| Romania/283584/2020                  | EPI_ISL_455469 | Laboratory for Respiratory Viruses, Cantacuzino National Military-Medical Institute for Research and Development                                                                                               | 2020-05-12 | M.Lazar et al           |
| Romania/284056/2020                  | EPI_ISL_455473 | Laboratory for Respiratory Viruses, Cantacuzino National Military-Medical Institute for Research and Development                                                                                               | 2020-05-14 | M.Lazar et al           |
| Romania/284188/2020                  | EPI_ISL_455472 | Laboratory for Respiratory Viruses, Cantacuzino National Military-Medical Institute for Research and Development                                                                                               | 2020-05-13 | M.Lazar et al           |
| Romania/284213/2020                  | EPI_ISL_455468 | Laboratory for Respiratory Viruses, Cantacuzino National Military-Medical Institute for Research and Development                                                                                               | 2020-05-13 | M.Lazar et al           |
| Romania/284371/2020                  | EPI_ISL_455477 | Laboratory for Respiratory Viruses, Cantacuzino National Military-Medical Institute for Research and Development                                                                                               | 2020-05-13 | M.Lazar et al           |
| Romania/284468/2020                  | EPI_ISL_455479 | Laboratory for Respiratory Viruses, Cantacuzino National Military-Medical Institute for Research and Development                                                                                               | 2020-05-14 | M.Lazar et al           |
| Romania/284489/2020                  | EPI_ISL_455470 | Laboratory for Respiratory Viruses, Cantacuzino National Military-Medical Institute for Research and Development                                                                                               | 2020-05-14 | M.Lazar et al           |
| Romania/284508/2020                  | EPI_ISL_455471 | Laboratory for Respiratory Viruses, Cantacuzino National Military-Medical Institute for Research and Development                                                                                               | 2020-05-14 | M.Lazar et al           |
| Romania/284762/2020                  | EPI_ISL_455475 | Laboratory for Respiratory Viruses, Cantacuzino National Military-Medical Institute for Research and Development                                                                                               | 2020-05-14 | M.Lazar et al           |
| Romania/284783/2020                  | EPI_ISL_455474 | Laboratory for Respiratory Viruses, Cantacuzino National Military-Medical Institute for Research and Development                                                                                               | 2020-05-14 | M.Lazar et al           |
| Romania/285388/2020                  | EPI_ISL_455476 | Laboratory for Respiratory Viruses, Cantacuzino National Military-Medical Institute for Research and Development                                                                                               | 2020-05-17 | M.Lazar et al           |
| Romania/ChNv7246/2020                | EPI_ISL_467780 | National Influenza Centre Romania                                                                                                                                                                              | 2020-04-28 | Victor M Corman et al A |
| Romania/ChNv7248/2020                | EPI_ISL_467781 | National Influenza Centre Romania                                                                                                                                                                              | 2020-04-28 | Victor M Corman et al A |
| Russia/Buryatia-84506/2020           | EPI_ISL_428894 | State Research Center of Virology and Biotechnology VECTOR, Department of Collection of Microorganisms                                                                                                         | 2020-03-27 | Oleg V. Pyankov et al   |
| Russia/Buryatia-86204/2020           | EPI_ISL_428899 | State Research Center of Virology and Biotechnology VECTOR, Department of Collection of Microorganisms                                                                                                         | 2020-03-29 | Sergey A. Bodnev et al  |
| Russia/Buryatia-87106/2020           | EPI_ISL_428919 | State Research Center of Virology and Biotechnology VECTOR, Department of Collection of Microorganisms                                                                                                         | 2020-03-30 | Sergey A. Bodnev et al  |
| Russia/Chechnya-83801/2020           | EPI_ISL_428900 | State Research Center of Virology and Biotechnology VECTOR, Department of Collection of Microorganisms                                                                                                         | 2020-03-26 | Oleg V. Pyankov et al   |
| Russia/CRIE/130014/2020              | EPI_ISL_470539 | Molecular diagnostic laboratory of Federal Budget Institution of Science "Central Research Institute of Epidemiology" of The Federal Service on Customers' Rights Protection and Human Well-being Surveillance | 2020-03-27 | Speranskaya AS et al    |
| Russia/CRIE/140762/2020              | EPI_ISL_460605 | Molecular diagnostic laboratory of Federal Budget Institution of Science "Central Research Institute of Epidemiology" of The Federal Service on Customers' Rights Protection and Human Well-being Surveillance | 2020-03-29 | Speranskaya AS et al    |
| Russia/CRIE/160583/2020              | EPI_ISL_462149 | Molecular diagnostic laboratory of Federal Budget Institution of Science "Central Research Institute of Epidemiology" of The Federal Service on Customers' Rights Protection and Human Well-being Surveillance | 2020-03-30 | Speranskaya AS et al    |
| Russia/CRIE/162784/2020              | EPI_ISL_462150 | Molecular diagnostic laboratory of Federal Budget Institution of Science "Central Research Institute of Epidemiology" of The Federal Service on Customers' Rights Protection and Human Well-being Surveillance | 2020-03-31 | Speranskaya AS et al    |
| Russia/Kabardino-Balkaria-80503/2020 | EPI_ISL_428898 | State Research Center of Virology and Biotechnology VECTOR, Department of Collection of Microorganisms                                                                                                         | 2020-03-23 | Sergey A. Bodnev et al  |
| Russia/Lipetsk-62704/2020            | EPI_ISL_428865 | State Research Center of Virology and Biotechnology VECTOR, Department of Collection of Microorganisms                                                                                                         | 2020-03-11 | Oleg V. Pyankov et al   |
| Russia/Moscow_PMV1-1/2020            | EPI_ISL_421275 | Russian State Collection of Viruses                                                                                                                                                                            | 2020-03-18 | Alexey Shcheĭneĭ et al  |
| Russia/Moscow_PMV1-3/2020            | EPI_ISL_470897 | Pathogenic Microorganisms Variability Laboratory                                                                                                                                                               | 2020-05-05 | Alexey Shcheĭneĭ et al  |
| Russia/Moscow_PMV1-5/2020            | EPI_ISL_470899 | Pathogenic Microorganisms Variability Laboratory                                                                                                                                                               | 2020-05-05 | Alexey Shcheĭneĭ et al  |
| Russia/Moscow_PMV1-8/2020            | EPI_ISL_470901 | Influenza etiology and epidemiology laboratory                                                                                                                                                                 | 2020-04-02 | Alexey Shcheĭneĭ et al  |
| Russia/Moscow_PMV1-9/2020            | EPI_ISL_470902 | Influenza etiology and epidemiology laboratory                                                                                                                                                                 | 2020-04-08 | Alexey Shcheĭneĭ et al  |
| Russia/Moscow-351/2020               | EPI_ISL_428852 | FSBSI "Chumakov Federal Scientific Center for Research and Development of Immune-and-Biological Products of Russian Academy of Sciences"                                                                       | 2020-04-02 | Lidub Kostovskaya et al |
| Russia/Moscow-62501/2020             | EPI_ISL_428861 | State Research Center of Virology and Biotechnology VECTOR, Department of Collection of Microorganisms                                                                                                         | 2020-03-11 | Oleg V. Pyankov et al   |
| Russia/Moscow-67117/2020             | EPI_ISL_428875 | State Research Center of Virology and Biotechnology VECTOR, Department of Collection of Microorganisms                                                                                                         | 2020-03-16 | Sergey A. Bodnev et al  |
| Russia/Moscow-71602/2020             | EPI_ISL_428877 | State Research Center of Virology and Biotechnology VECTOR, Department of Collection of Microorganisms                                                                                                         | 2020-03-19 | Sergey A. Bodnev et al  |
| Russia/Moscow-77610/2020             | EPI_ISL_428887 | State Research Center of Virology and Biotechnology VECTOR, Department of Collection of Microorganisms                                                                                                         | 2020-03-22 | Oleg V. Pyankov et al   |
| Russia/Moscow-77627/2020             | EPI_ISL_428884 | State Research Center of Virology and Biotechnology VECTOR, Department of Collection of Microorganisms                                                                                                         | 2020-03-22 | Oleg V. Pyankov et al   |
| Russia/Moscow-80402/2020             | EPI_ISL_428905 | State Research Center of Virology and Biotechnology VECTOR, Department of Collection of Microorganisms                                                                                                         | 2020-03-23 | Sergey A. Bodnev et al  |
| Russia/Moscow-GOBL3/2020             | EPI_ISL_436717 | Genomics and Computational Biology Lab, Scientific Research Institute of Physical-Chemical Medicine, FMBA of Russia                                                                                            | 2020-04-14 | A. Pavlenko et al       |
| Russia/Pskov-83602/2020              | EPI_ISL_428908 | State Research Center of Virology and Biotechnology VECTOR, Department of Collection of Microorganisms                                                                                                         | 2020-03-25 | Oleg V. Pyankov et al   |
| Russia/SCPM-O/01/2020                | EPI_ISL_451963 | Federal Budget Institution of Science, State Research Center for Applied Microbiology & Biotechnology                                                                                                          | 2020-03-20 | Dyustlov I et al        |
| Russia/SCPM-O/03/2020                | EPI_ISL_451965 | Federal Budget Institution of Science, State Research Center for Applied Microbiology & Biotechnology                                                                                                          | 2020-03-20 | Dyustlov I et al        |
| Russia/SiPetersburg-64304/2020       | EPI_ISL_428868 | State Research Center of Virology and Biotechnology VECTOR, Department of Collection of Microorganisms                                                                                                         | 2020-03-13 | Oleg V. Pyankov et al   |
| Russia/SiPetersburg-73603/2020       | EPI_ISL_428883 | State Research Center of Virology and Biotechnology VECTOR, Department of Collection of Microorganisms                                                                                                         | 2020-03-20 | Oleg V. Pyankov et al   |
| Russia/SiPetersburg-R141445/2020     | EPI_ISL_427307 | WHO National Influenza Centre Russian Federation                                                                                                                                                               | 2020-03-20 | Andrey Komissarov et al |
| Russia/SiPetersburg-R14326S/2020     | EPI_ISL_427337 | WHO National Influenza Centre Russian Federation                                                                                                                                                               | 2020-03-25 | Andrey Komissarov et al |
| Russia/SiPetersburg-R14328S/2020     | EPI_ISL_427338 | WHO National Influenza Centre Russian Federation                                                                                                                                                               | 2020-03-25 | Andrey Komissarov et al |
| Russia/SiPetersburg-R14697S/2020     | EPI_ISL_427325 | WHO National Influenza Centre Russian Federation                                                                                                                                                               | 2020-04-07 | Andrey Komissarov et al |
| Russia/SiPetersburg-R14697S/2020     | EPI_ISL_427328 | WHO National Influenza Centre Russian Federation                                                                                                                                                               | 2020-04-07 | Andrey Komissarov et al |
| Russia/SiPetersburg-R14707S/2020     | EPI_ISL_427329 | WHO National Influenza Centre Russian Federation                                                                                                                                                               | 2020-04-07 | Andrey Komissarov et al |
| Russia/SiPetersburg-R14712/2020      | EPI_ISL_427326 | WHO National Influenza Centre Russian Federation                                                                                                                                                               | 2020-04-07 | Andrey Komissarov et al |
| Russia/SiPetersburg-R14724S/2020     | EPI_ISL_427333 | WHO National Influenza Centre Russian Federation                                                                                                                                                               | 2020-04-07 | Andrey Komissarov et al |
| Russia/SiPetersburg-R14726S/2020     | EPI_ISL_427334 | WHO National Influenza Centre Russian Federation                                                                                                                                                               | 2020-04-07 | Andrey Komissarov et al |
| Russia/SiPetersburg-R14917S/2020     | EPI_ISL_430070 | WHO National Influenza Centre Russian Federation                                                                                                                                                               | 2020-04-07 | Andrey Komissarov et al |
| Russia/SiPetersburg-R14963S/2020     | EPI_ISL_430080 | WHO National Influenza Centre Russian Federation                                                                                                                                                               | 2020-04-10 | Andrey Komissarov et al |
| Russia/SiPetersburg-R15169S/2020     | EPI_ISL_430088 | WHO National Influenza Centre Russian Federation                                                                                                                                                               | 2020-04-09 | Andrey Komissarov et al |
| Russia/SiPetersburg-R15244S/2020     | EPI_ISL_430090 | WHO National Influenza Centre Russian Federation                                                                                                                                                               | 2020-04-10 | Andrey Komissarov et al |
| Russia/SiPetersburg-R15634S/2020     | EPI_ISL_430093 | WHO National Influenza Centre Russian Federation                                                                                                                                                               | 2020-04-14 | Andrey Komissarov et al |
| Russia/SiPetersburg-R15635S/2020     | EPI_ISL_430094 | WHO National Influenza Centre Russian Federation                                                                                                                                                               | 2020-04-14 | Andrey Komissarov et al |







|                                      |               |                                                                                                                                                                                                                                 |                                                                                                                                    |            |                                                                                                                                  |
|--------------------------------------|---------------|---------------------------------------------------------------------------------------------------------------------------------------------------------------------------------------------------------------------------------|------------------------------------------------------------------------------------------------------------------------------------|------------|----------------------------------------------------------------------------------------------------------------------------------|
| SouthAfricaKRISP-0156/2020           | EPI_SL_467506 | Molecular Diagnostics Services (MDS)                                                                                                                                                                                            | KRISP, KZN Research Innovation and Sequencing Platform                                                                             | 2020-06-01 | Giandhari J et al B                                                                                                              |
| SouthAfricaKRISP-0157/2020           | EPI_SL_467507 | NHLS-4ALCH                                                                                                                                                                                                                      | KRISP, KZN Research Innovation and Sequencing Platform                                                                             | 2020-05-25 | Giandhari J et al B                                                                                                              |
| SouthAfricaKRISP-0158/2020           | EPI_SL_467508 | NHLS-4ALCH                                                                                                                                                                                                                      | KRISP, KZN Research Innovation and Sequencing Platform                                                                             | 2020-05-28 | Giandhari J et al B                                                                                                              |
| SouthAfricaKRISP-0159/2020           | EPI_SL_467509 | NHLS-4ALCH                                                                                                                                                                                                                      | KRISP, KZN Research Innovation and Sequencing Platform                                                                             | 2020-06-01 | Giandhari J et al B                                                                                                              |
| SouthAfricaKRISP-0160/2020           | EPI_SL_467510 | NHLS-4ALCH                                                                                                                                                                                                                      | KRISP, KZN Research Innovation and Sequencing Platform                                                                             | 2020-06-01 | Giandhari J et al B                                                                                                              |
| SouthAfricaKRISP-0161/2020           | EPI_SL_467511 | NHLS-4ALCH                                                                                                                                                                                                                      | KRISP, KZN Research Innovation and Sequencing Platform                                                                             | 2020-06-01 | Giandhari J et al B                                                                                                              |
| SouthAfricaKRISP-0162/2020           | EPI_SL_467512 | NHLS-4ALCH                                                                                                                                                                                                                      | KRISP, KZN Research Innovation and Sequencing Platform                                                                             | 2020-06-01 | Giandhari J et al B                                                                                                              |
| SouthAfricaKRISP-0163/2020           | EPI_SL_467513 | NHLS-4ALCH                                                                                                                                                                                                                      | KRISP, KZN Research Innovation and Sequencing Platform                                                                             | 2020-06-01 | Giandhari J et al B                                                                                                              |
| SouthAfricaKRISP-0164/2020           | EPI_SL_467514 | NHLS-4ALCH                                                                                                                                                                                                                      | KRISP, KZN Research Innovation and Sequencing Platform                                                                             | 2020-06-01 | Giandhari J et al B                                                                                                              |
| SouthAfricaKRISP-0165/2020           | EPI_SL_467515 | NHLS-4ALCH                                                                                                                                                                                                                      | KRISP, KZN Research Innovation and Sequencing Platform                                                                             | 2020-05-29 | Giandhari J et al B                                                                                                              |
| SouthAfricaKRISP-0167/2020           | EPI_SL_467517 | NHLS-4ALCH                                                                                                                                                                                                                      | KRISP, KZN Research Innovation and Sequencing Platform                                                                             | 2020-06-02 | Giandhari J et al B                                                                                                              |
| SouthAfricaKRISP-0169/2020           | EPI_SL_467519 | NHLS-4ALCH                                                                                                                                                                                                                      | KRISP, KZN Research Innovation and Sequencing Platform                                                                             | 2020-05-31 | Giandhari J et al B                                                                                                              |
| SouthAfricaKRISP-0170/2020           | EPI_SL_467520 | NHLS-4ALCH                                                                                                                                                                                                                      | KRISP, KZN Research Innovation and Sequencing Platform                                                                             | 2020-05-31 | Giandhari J et al B                                                                                                              |
| SouthAfricaKRISP-0171/2020           | EPI_SL_467521 | NHLS-4ALCH                                                                                                                                                                                                                      | KRISP, KZN Research Innovation and Sequencing Platform                                                                             | 2020-06-02 | Giandhari J et al B                                                                                                              |
| SouthAfricaKRISP-0172/2020           | EPI_SL_467522 | NHLS-4ALCH                                                                                                                                                                                                                      | KRISP, KZN Research Innovation and Sequencing Platform                                                                             | 2020-06-02 | Giandhari J et al B                                                                                                              |
| SouthAfricaKRISP-0173/2020           | EPI_SL_467523 | NHLS-4ALCH                                                                                                                                                                                                                      | KRISP, KZN Research Innovation and Sequencing Platform                                                                             | 2020-06-02 | Giandhari J et al B                                                                                                              |
| SouthAfricaKRISP-0174/2020           | EPI_SL_467524 | NHLS-4ALCH                                                                                                                                                                                                                      | KRISP, KZN Research Innovation and Sequencing Platform                                                                             | 2020-06-04 | Giandhari J et al B                                                                                                              |
| SouthAfricaKRISP-04/2020             | EPI_SL_436684 | KRISP, KZN Research Innovation and Sequencing Platform                                                                                                                                                                          | KRISP, KZN Research Innovation and Sequencing Platform                                                                             | 2020-03-31 | Giandhari J et al A ( <a href="https://doi.org/10.1101/2020.05.29.20116376">https://doi.org/10.1101/2020.05.29.20116376</a> )    |
| SouthAfricaKRISP-045/2020            | EPI_SL_436686 | KRISP, KZN Research Innovation and Sequencing Platform                                                                                                                                                                          | KRISP, KZN Research Innovation and Sequencing Platform                                                                             | 2020-03-27 | Giandhari J et al A ( <a href="https://doi.org/10.1101/2020.05.29.20116376">https://doi.org/10.1101/2020.05.29.20116376</a> )    |
| SouthAfricaKRISP-051/2020            | EPI_SL_436687 | KRISP, KZN Research Innovation and Sequencing Platform                                                                                                                                                                          | KRISP, KZN Research Innovation and Sequencing Platform                                                                             | 2020-03-28 | Giandhari J et al A ( <a href="https://doi.org/10.1101/2020.05.29.20116376">https://doi.org/10.1101/2020.05.29.20116376</a> )    |
| SouthAfricaKRISP-06/2020             | EPI_SL_421573 | Molecular Diagnostic Services                                                                                                                                                                                                   | KRISP, KZN Research Innovation and Sequencing Platform                                                                             | 2020-03-31 | Giandhari J et al A ( <a href="https://doi.org/10.1101/2020.05.29.20116376">https://doi.org/10.1101/2020.05.29.20116376</a> )    |
| SouthAfricaKRISP-07/2020             | EPI_SL_421574 | Molecular Diagnostic Services                                                                                                                                                                                                   | KRISP, KZN Research Innovation and Sequencing Platform                                                                             | 2020-04-01 | Giandhari J et al A ( <a href="https://doi.org/10.1101/2020.05.29.20116376">https://doi.org/10.1101/2020.05.29.20116376</a> )    |
| SouthAfricaKRISP-101/2020            | EPI_SL_455631 | KRISP, KZN Research Innovation and Sequencing Platform                                                                                                                                                                          | KRISP, KZN Research Innovation and Sequencing Platform                                                                             | 2020-04-30 | Giandhari J et al A ( <a href="https://doi.org/10.1101/2020.05.29.20116376">https://doi.org/10.1101/2020.05.29.20116376</a> )    |
| SouthAfricaKRISP-102/2020            | EPI_SL_455632 | KRISP, KZN Research Innovation and Sequencing Platform                                                                                                                                                                          | KRISP, KZN Research Innovation and Sequencing Platform                                                                             | 2020-04-30 | Giandhari J et al A ( <a href="https://doi.org/10.1101/2020.05.29.20116376">https://doi.org/10.1101/2020.05.29.20116376</a> )    |
| SouthAfricaKRISP-104/2020            | EPI_SL_455634 | KRISP, KZN Research Innovation and Sequencing Platform                                                                                                                                                                          | KRISP, KZN Research Innovation and Sequencing Platform                                                                             | 2020-05-01 | Giandhari J et al A ( <a href="https://doi.org/10.1101/2020.05.29.20116376">https://doi.org/10.1101/2020.05.29.20116376</a> )    |
| SouthAfricaKRISP-106/2020            | EPI_SL_455636 | KRISP, KZN Research Innovation and Sequencing Platform                                                                                                                                                                          | KRISP, KZN Research Innovation and Sequencing Platform                                                                             | 2020-03-31 | Giandhari J et al A ( <a href="https://doi.org/10.1101/2020.05.29.20116376">https://doi.org/10.1101/2020.05.29.20116376</a> )    |
| SouthAfricaKRISP-107/2020            | EPI_SL_455637 | KRISP, KZN Research Innovation and Sequencing Platform                                                                                                                                                                          | KRISP, KZN Research Innovation and Sequencing Platform                                                                             | 2020-05-04 | Giandhari J et al A ( <a href="https://doi.org/10.1101/2020.05.29.20116376">https://doi.org/10.1101/2020.05.29.20116376</a> )    |
| SouthAfricaKRISP-108/2020            | EPI_SL_455638 | KRISP, KZN Research Innovation and Sequencing Platform                                                                                                                                                                          | KRISP, KZN Research Innovation and Sequencing Platform                                                                             | 2020-05-04 | Giandhari J et al A ( <a href="https://doi.org/10.1101/2020.05.29.20116376">https://doi.org/10.1101/2020.05.29.20116376</a> )    |
| SouthAfricaKRISP-109/2020            | EPI_SL_455639 | KRISP, KZN Research Innovation and Sequencing Platform                                                                                                                                                                          | KRISP, KZN Research Innovation and Sequencing Platform                                                                             | 2020-03-31 | Giandhari J et al A ( <a href="https://doi.org/10.1101/2020.05.29.20116376">https://doi.org/10.1101/2020.05.29.20116376</a> )    |
| SouthAfricaKRISP-109/2020            | EPI_SL_455639 | KRISP, KZN Research Innovation and Sequencing Platform                                                                                                                                                                          | KRISP, KZN Research Innovation and Sequencing Platform                                                                             | 2020-03-31 | Giandhari J et al A ( <a href="https://doi.org/10.1101/2020.05.29.20116376">https://doi.org/10.1101/2020.05.29.20116376</a> )    |
| SouthAfricaR02027/2020               | EPI_SL_430297 | National Institute for Communicable Diseases of the National Health Laboratory Service                                                                                                                                          | KRISP, KZN Research Innovation and Sequencing Platform                                                                             | 2020-03-06 | Altam M et al A                                                                                                                  |
| SouthAfricaR03006/2020               | EPI_SL_417186 | National Institute for Communicable Diseases of the National Health Laboratory Service                                                                                                                                          | National Institute for Communicable Diseases of the National Health Laboratory Service                                             | 2020-03-07 | Altam M et al B ( <a href="https://doi.org/10.1101/2020.05.29.20116376">https://doi.org/10.1101/2020.05.29.20116376</a> )        |
| SouthAfricaR04827/2020               | EPI_SL_450296 | National Institute for Communicable Diseases of the National Health Laboratory Service                                                                                                                                          | National Institute for Communicable Diseases of the National Health Laboratory Service                                             | 2020-03-17 | Altam M et al A                                                                                                                  |
| SouthAfricaR05204/2020               | EPI_SL_450297 | National Institute for Communicable Diseases of the National Health Laboratory Service                                                                                                                                          | National Institute for Communicable Diseases of the National Health Laboratory Service                                             | 2020-03-19 | Altam M et al A                                                                                                                  |
| SouthAfricaR05360/2020               | EPI_SL_450298 | National Institute for Communicable Diseases of the National Health Laboratory Service                                                                                                                                          | National Institute for Communicable Diseases of the National Health Laboratory Service                                             | 2020-03-19 | Altam M et al A                                                                                                                  |
| SouthAfricaR05929/2020               | EPI_SL_450495 | National Institute for Communicable Diseases of the National Health Laboratory Service                                                                                                                                          | National Institute for Communicable Diseases of the National Health Laboratory Service                                             | 2020-03-25 | Altam M et al A                                                                                                                  |
| SouthAfricaR07552/2020               | EPI_SL_450299 | National Institute for Communicable Diseases of the National Health Laboratory Service                                                                                                                                          | National Institute for Communicable Diseases of the National Health Laboratory Service                                             | 2020-03-31 | Altam M et al A                                                                                                                  |
| SouthAfricaR07801/2020               | EPI_SL_450300 | National Institute for Communicable Diseases of the National Health Laboratory Service                                                                                                                                          | National Institute for Communicable Diseases of the National Health Laboratory Service                                             | 2020-03-30 | Altam M et al A                                                                                                                  |
| SouthAfricaR09126/2020               | EPI_SL_470880 | National Institute for Communicable Diseases of the National Health Laboratory Service                                                                                                                                          | National Institute for Communicable Diseases of the National Health Laboratory Service                                             | 2020-04-28 | Altam M et al A                                                                                                                  |
| SouthKoreaKDCD12/2020                | EPI_SL_412872 | Division of Viral Diseases, Center for Laboratory Control of Infectious Diseases, Korea Centers for Disease Control and Prevention                                                                                              | KRISP, KZN Research Innovation and Sequencing Platform                                                                             | 2020-02-01 | Jeong-Min Kim et al A                                                                                                            |
| SouthKoreaKDCD24/2020                | EPI_SL_412873 | Division of Viral Diseases, Center for Laboratory Control of Infectious Diseases, Korea Centers for Disease Control and Prevention                                                                                              | Division of Viral Diseases, Center for Laboratory Control of Infectious Diseases, Korea Centers for Disease Control and Prevention | 2020-02-06 | Jeong-Min Kim et al A                                                                                                            |
| SouthKoreaKUMC01/2020                | EPI_SL_413017 | Department of Microbiology, Institute for Viral Diseases, College of Medicine, Korea University                                                                                                                                 | Department of Microbiology, Institute for Viral Diseases, College of Medicine, Korea University                                    | 2020-02-06 | Changmin Kang et al                                                                                                              |
| SouthKoreaKUMC02/2020                | EPI_SL_413018 | Department of Microbiology, Institute for Viral Diseases, College of Medicine, Korea University                                                                                                                                 | Department of Microbiology, Institute for Viral Diseases, College of Medicine, Korea University                                    | 2020-02-06 | Changmin Kang et al                                                                                                              |
| Spain100_20/2020                     | EPI_SL_463000 | Molecular Genetics                                                                                                                                                                                                              | Molecular Genetics                                                                                                                 | 2020-05-30 | Gomez et al                                                                                                                      |
| Spain67_20/2020                      | EPI_SL_462996 | Molecular Genetics                                                                                                                                                                                                              | Molecular Genetics                                                                                                                 | 2020-05-30 | Gomez et al                                                                                                                      |
| Spain68_19/2020                      | EPI_SL_462996 | Molecular Genetics                                                                                                                                                                                                              | Molecular Genetics                                                                                                                 | 2020-05-30 | Gomez et al                                                                                                                      |
| Spain80_19/2020                      | EPI_SL_462997 | Molecular Genetics                                                                                                                                                                                                              | Molecular Genetics                                                                                                                 | 2020-05-30 | Gomez et al                                                                                                                      |
| Spain86_17/2020                      | EPI_SL_462998 | Molecular Genetics                                                                                                                                                                                                              | Molecular Genetics                                                                                                                 | 2020-05-30 | Gomez et al                                                                                                                      |
| Spain96_19/2020                      | EPI_SL_462999 | Molecular Genetics                                                                                                                                                                                                              | Molecular Genetics                                                                                                                 | 2020-05-30 | Gomez et al                                                                                                                      |
| SpainACoruna_001/2020                | EPI_SL_468331 | Microbiology Service, University Hospital of A Coruna-Biomedical Research Institute                                                                                                                                             | Genomes & Disease, Center for Research in Molecular Medicine and Chronic Diseases, University of Santiago de Compostela            | 2020-05-11 | Kelly Conde et al                                                                                                                |
| SpainACoruna_002/2020                | EPI_SL_468332 | Microbiology Service, University Hospital of A Coruna-Biomedical Research Institute                                                                                                                                             | Genomes & Disease, Center for Research in Molecular Medicine and Chronic Diseases, University of Santiago de Compostela            | 2020-05-11 | Kelly Conde et al                                                                                                                |
| SpainACoruna_006/2020                | EPI_SL_468336 | Microbiology Service, University Hospital of A Coruna-Biomedical Research Institute                                                                                                                                             | Genomes & Disease, Center for Research in Molecular Medicine and Chronic Diseases, University of Santiago de Compostela            | 2020-05-10 | Kelly Conde et al                                                                                                                |
| SpainACoruna_008/2020                | EPI_SL_468338 | Microbiology Service, University Hospital of A Coruna-Biomedical Research Institute                                                                                                                                             | Genomes & Disease, Center for Research in Molecular Medicine and Chronic Diseases, University of Santiago de Compostela            | 2020-05-10 | Kelly Conde et al                                                                                                                |
| SpainACoruna_011/2020                | EPI_SL_468341 | Microbiology Service, University Hospital of A Coruna-Biomedical Research Institute                                                                                                                                             | Genomes & Disease, Center for Research in Molecular Medicine and Chronic Diseases, University of Santiago de Compostela            | 2020-05-12 | Kelly Conde et al                                                                                                                |
| SpainACoruna_012/2020                | EPI_SL_468342 | Microbiology Service, University Hospital of A Coruna-Biomedical Research Institute                                                                                                                                             | Genomes & Disease, Center for Research in Molecular Medicine and Chronic Diseases, University of Santiago de Compostela            | 2020-05-12 | Kelly Conde et al                                                                                                                |
| SpainACoruna_013/2020                | EPI_SL_468343 | Microbiology Service, University Hospital of A Coruna-Biomedical Research Institute                                                                                                                                             | Genomes & Disease, Center for Research in Molecular Medicine and Chronic Diseases, University of Santiago de Compostela            | 2020-05-29 | Kelly Conde et al                                                                                                                |
| SpainACoruna_014/2020                | EPI_SL_468344 | Microbiology Service, University Hospital of A Coruna-Biomedical Research Institute                                                                                                                                             | Genomes & Disease, Center for Research in Molecular Medicine and Chronic Diseases, University of Santiago de Compostela            | 2020-05-12 | Kelly Conde et al                                                                                                                |
| SpainAmassara33/2020                 | EPI_SL_455722 | Servicio de Microbiología, Hospital Clínico Universitario de Valencia                                                                                                                                                           | SeqCOVID-SPAIN consortium/IBV(CSIC)                                                                                                | 2020-03-30 | Giuseppe Auria et al                                                                                                             |
| SpainCanañas201939/2020              | EPI_SL_455326 | Hospital Universitario Insular de Gran Canaria                                                                                                                                                                                  | Instituto de Salud Carlos III                                                                                                      | 2020-02-29 | Iglesias-Caballero et al B                                                                                                       |
| SpainCastillaLaMancha201328/2020     | EPI_SL_418245 | Hospital General y Universitario de Guadalajara                                                                                                                                                                                 | Instituto de Salud Carlos III                                                                                                      | 2020-03-01 | Iglesias-Caballero et al A ( <a href="https://doi.org/10.1101/2020.04.20.050039">https://doi.org/10.1101/2020.04.20.050039</a> ) |
| SpainCastillaLeon201061/2020         | EPI_SL_418247 | HOSPITAL GENERAL DE SEGOVIA                                                                                                                                                                                                     | Instituto de Salud Carlos III                                                                                                      | 2020-02-26 | Iglesias-Caballero et al A ( <a href="https://doi.org/10.1101/2020.04.20.050039">https://doi.org/10.1101/2020.04.20.050039</a> ) |
| SpainCastillaLeon201372/2020         | EPI_SL_418249 | COMPLEJO ASISTENCIAL UNIVERSITARIO DE BURGOS                                                                                                                                                                                    | Instituto de Salud Carlos III                                                                                                      | 2020-03-03 | Iglesias-Caballero et al A ( <a href="https://doi.org/10.1101/2020.04.20.050039">https://doi.org/10.1101/2020.04.20.050039</a> ) |
| SpainCOV000692/2020                  | EPI_SL_452772 | Hospital Universitario Araba. Vitoria-Gasteiz,                                                                                                                                                                                  | SeqCOVID-SPAIN consortium/IBV(CSIC)                                                                                                | 2020-02-29 | Silvia Hemáez Crespo et al                                                                                                       |
| SpainCOV000716/2020                  | EPI_SL_452752 | Hospital Universitario Araba. Vitoria-Gasteiz,                                                                                                                                                                                  | SeqCOVID-SPAIN consortium/IBV(CSIC)                                                                                                | 2020-03-05 | Silvia Hemáez Crespo et al                                                                                                       |
| SpainCOV000758/2020                  | EPI_SL_452733 | Hospital Universitario Araba. Vitoria-Gasteiz,                                                                                                                                                                                  | SeqCOVID-SPAIN consortium/IBV(CSIC)                                                                                                | 2020-03-06 | Silvia Hemáez Crespo et al                                                                                                       |
| SpainCOV000822/2020                  | EPI_SL_452710 | Hospital Universitario Araba. Vitoria-Gasteiz,                                                                                                                                                                                  | SeqCOVID-SPAIN consortium/IBV(CSIC)                                                                                                | 2020-03-10 | Silvia Hemáez Crespo et al                                                                                                       |
| SpainCOV000860/2020                  | EPI_SL_452692 | Hospital Universitario Araba. Vitoria-Gasteiz,                                                                                                                                                                                  | SeqCOVID-SPAIN consortium/IBV(CSIC)                                                                                                | 2020-02-29 | Silvia Hemáez Crespo et al                                                                                                       |
| SpainCOV001056/2020                  | EPI_SL_452616 | Servicio de Microbiología y Parasitología clínica. UCEIMP, Hospital Universitario Virgen del Rocío/IBS/CIS/CISLAS                                                                                                               | SeqCOVID-SPAIN consortium/IBV(CSIC)                                                                                                | 2020-04-01 | Guillermo Martín Gutiérrez et al                                                                                                 |
| SpainCOV001058/2020                  | EPI_SL_452614 | Servicio de Microbiología y Parasitología clínica. UCEIMP, Hospital Universitario Virgen del Rocío/IBS/CIS/CISLAS                                                                                                               | SeqCOVID-SPAIN consortium/IBV(CSIC)                                                                                                | 2020-04-01 | Guillermo Martín Gutiérrez et al                                                                                                 |
| SpainCOV001068/2020                  | EPI_SL_452610 | Servicio de Microbiología y Parasitología clínica. UCEIMP, Hospital Universitario Virgen del Rocío/IBS/CIS/CISLAS                                                                                                               | SeqCOVID-SPAIN consortium/IBV(CSIC)                                                                                                | 2020-04-01 | Guillermo Martín Gutiérrez et al                                                                                                 |
| SpainCOV001384/2020                  | EPI_SL_452517 | Clinica Universidad de Navarra. Servicio de Enfermedades Infecciosas y Microbiología clínica                                                                                                                                    | SeqCOVID-SPAIN consortium/IBV(CSIC)                                                                                                | 2020-03-15 | Miriam Fernández-Arso et al                                                                                                      |
| SpainCOV001477/2020                  | EPI_SL_467128 | Hospital Universitario Araba. Vitoria-Gasteiz                                                                                                                                                                                   | SeqCOVID-SPAIN consortium/IBV(CSIC)                                                                                                | 2020-03-18 | Silvia Hemáez Crespo et al                                                                                                       |
| SpainCOV001525/2020                  | EPI_SL_467167 | Hospital Universitario Araba. Vitoria-Gasteiz                                                                                                                                                                                   | SeqCOVID-SPAIN consortium/IBV(CSIC)                                                                                                | 2020-03-17 | Silvia Hemáez Crespo et al                                                                                                       |
| SpainCOV001528/2020                  | EPI_SL_467159 | Hospital Universitario Araba. Vitoria-Gasteiz                                                                                                                                                                                   | SeqCOVID-SPAIN consortium/IBV(CSIC)                                                                                                | 2020-03-13 | Silvia Hemáez Crespo et al                                                                                                       |
| SpainCOV001544/2020                  | EPI_SL_467182 | Hospital Universitario Araba. Vitoria-Gasteiz                                                                                                                                                                                   | SeqCOVID-SPAIN consortium/IBV(CSIC)                                                                                                | 2020-03-16 | Silvia Hemáez Crespo et al                                                                                                       |
| SpainCOV001585/2020                  | EPI_SL_467136 | Hospital Universitario Araba. Vitoria-Gasteiz                                                                                                                                                                                   | SeqCOVID-SPAIN consortium/IBV(CSIC)                                                                                                | 2020-03-13 | Silvia Hemáez Crespo et al                                                                                                       |
| SpainCOV001889/2020                  | EPI_SL_452459 | Hospital Universitario Puerta del Mar de Cádiz - INBICA                                                                                                                                                                         | SeqCOVID-SPAIN consortium/IBV(CSIC)                                                                                                | 2020-03-13 | Salud Rodríguez-Palares et al                                                                                                    |
| SpainCOV001924/2020                  | EPI_SL_452450 | Servicio de Microbiología. HRU de Málaga. Servicio Andaluz de Salud                                                                                                                                                             | SeqCOVID-SPAIN consortium/IBV(CSIC)                                                                                                | 2020-03-06 | Irmaucada de Toro Penado et al                                                                                                   |
| SpainCOV001935/2020                  | EPI_SL_452441 | Servicio de Microbiología. HRU de Málaga. Servicio Andaluz de Salud                                                                                                                                                             | SeqCOVID-SPAIN consortium/IBV(CSIC)                                                                                                | 2020-03-12 | Irmaucada de Toro Penado et al                                                                                                   |
| SpainCOV001972/2020                  | EPI_SL_452410 | Servicio de Microbiología. HRU de Málaga. Servicio Andaluz de Salud                                                                                                                                                             | SeqCOVID-SPAIN consortium/IBV(CSIC)                                                                                                | 2020-03-14 | Irmaucada de Toro Penado et al                                                                                                   |
| SpainCOV002726/2020                  | EPI_SL_467266 | Hospital Clínico Universitario de Santiago de Compostela                                                                                                                                                                        | SeqCOVID-SPAIN consortium/IBV(CSIC)                                                                                                | 2020-04-15 | José Javier Costa Alcalde et al                                                                                                  |
| SpainCOV002733/2020                  | EPI_SL_467289 | Hospital Clínico Universitario de Santiago de Compostela                                                                                                                                                                        | SeqCOVID-SPAIN consortium/IBV(CSIC)                                                                                                | 2020-04-13 | José Javier Costa Alcalde et al                                                                                                  |
| SpainCOV002736/2020                  | EPI_SL_467291 | Hospital Clínico Universitario de Santiago de Compostela                                                                                                                                                                        | SeqCOVID-SPAIN consortium/IBV(CSIC)                                                                                                | 2020-04-13 | José Javier Costa Alcalde et al                                                                                                  |
| SpainCOV002740/2020                  | EPI_SL_467280 | Hospital Clínico Universitario de Santiago de Compostela                                                                                                                                                                        | SeqCOVID-SPAIN consortium/IBV(CSIC)                                                                                                | 2020-04-15 | José Javier Costa Alcalde et al                                                                                                  |
| SpainCOV002753/2020                  | EPI_SL_467277 | Hospital Clínico Universitario de Santiago de Compostela                                                                                                                                                                        | SeqCOVID-SPAIN consortium/IBV(CSIC)                                                                                                | 2020-04-13 | José Javier Costa Alcalde et al                                                                                                  |
| SpainCOV003647/2020                  | EPI_SL_467187 | Hospital General Universitario Gregorio Marañón                                                                                                                                                                                 | SeqCOVID-SPAIN consortium/IBV(CSIC)                                                                                                | 2020-04-01 | Laura Pérez-Lago et al                                                                                                           |
| SpainCOV003660/2020                  | EPI_SL_467222 | Hospital General Universitario Gregorio Marañón                                                                                                                                                                                 | SeqCOVID-SPAIN consortium/IBV(CSIC)                                                                                                | 2020-04-01 | Laura Pérez-Lago et al                                                                                                           |
| SpainCOV003665/2020                  | EPI_SL_467215 | Hospital General Universitario Gregorio Marañón                                                                                                                                                                                 | SeqCOVID-SPAIN consortium/IBV(CSIC)                                                                                                | 2020-04-01 | Laura Pérez-Lago et al                                                                                                           |
| SpainCOV003666/2020                  | EPI_SL_467232 | Hospital General Universitario Gregorio Marañón                                                                                                                                                                                 | SeqCOVID-SPAIN consortium/IBV(CSIC)                                                                                                | 2020-04-01 | Laura Pérez-Lago et al                                                                                                           |
| SpainCOV003680/2020                  | EPI_SL_467192 | Hospital General Universitario Gregorio Marañón                                                                                                                                                                                 | SeqCOVID-SPAIN consortium/IBV(CSIC)                                                                                                | 2020-04-02 | Laura Pérez-Lago et al                                                                                                           |
| SpainCOV003692/2020                  | EPI_SL_467252 | Hospital General Universitario Gregorio Marañón                                                                                                                                                                                 | SeqCOVID-SPAIN consortium/IBV(CSIC)                                                                                                | 2020-04-02 | Laura Pérez-Lago et al                                                                                                           |
| SpainCOV003699/2020                  | EPI_SL_467231 | Hospital General Universitario Gregorio Marañón                                                                                                                                                                                 | SeqCOVID-SPAIN consortium/IBV(CSIC)                                                                                                | 2020-04-02 | Laura Pérez-Lago et al                                                                                                           |
| SpainCOV003712/2020                  | EPI_SL_467220 | Hospital General Universitario Gregorio Marañón                                                                                                                                                                                 | SeqCOVID-SPAIN consortium/IBV(CSIC)                                                                                                | 2020-04-02 | Laura Pérez-Lago et al                                                                                                           |
| SpainCOV003722/2020                  | EPI_SL_467190 | Hospital General Universitario Gregorio Marañón                                                                                                                                                                                 | SeqCOVID-SPAIN consortium/IBV(CSIC)                                                                                                | 2020-05-07 | Laura Pérez-Lago et al                                                                                                           |
| SpainCOV003723/2020                  | EPI_SL_467234 | Hospital General Universitario Gregorio Marañón                                                                                                                                                                                 | SeqCOVID-SPAIN consortium/IBV(CSIC)                                                                                                | 2020-05-07 | Laura Pérez-Lago et al                                                                                                           |
| SpainCOV003724/2020                  | EPI_SL_467195 | Hospital General Universitario Gregorio Marañón                                                                                                                                                                                 | SeqCOVID-SPAIN consortium/IBV(CSIC)                                                                                                | 2020-05-10 | Laura Pérez-Lago et al                                                                                                           |
| SpainCOV003725/2020                  | EPI_SL_467246 | Hospital General Universitario Gregorio Marañón                                                                                                                                                                                 | SeqCOVID-SPAIN consortium/IBV(CSIC)                                                                                                | 2020-05-10 | Laura Pérez-Lago et al                                                                                                           |
| SpainDonostia_San_Sebastian2077/2020 | EPI_SL_468872 | Servicio de Microbiología, Hospital Universitario Donostia. OSI Donostialdea. Área de Enfermedades Infecciosas, Grupo de Infección Respiratoria y Resistencia Antimicrobiana. Instituto de Investigación Sanitaria Biodonostia. | SeqCOVID-SPAIN consortium/IBV(CSIC)                                                                                                | 2020-04-10 | Gustavo Cilla et al                                                                                                              |
| SpainDonostia_San_Sebastian2098/2020 | EPI_SL_468902 | Servicio de Microbiología, Hospital Universitario Donostia. OSI Donostialdea. Área de Enfermedades Infecciosas, Grupo de Infección Respiratoria y Resistencia Antimicrobiana. Instituto de Investigación Sanitaria Biodonostia. | SeqCOVID-SPAIN consortium/IBV(CSIC)                                                                                                | 2020-04-11 | Gustavo Cilla et al                                                                                                              |
| SpainDonostia_San_Sebastian2101/2020 | EPI_SL_468883 | Servicio de Microbiología, Hospital Universitario Donostia. OSI Donostialdea. Área de Enfermedades Infecciosas, Grupo de Infección Respiratoria y Resistencia Antimicrobiana. Instituto de Investigación Sanitaria Biodonostia. | SeqCOVID-SPAIN consortium/IBV(CSIC)                                                                                                | 2020-04-11 | Gustavo Cilla et al                                                                                                              |
| SpainDonostia_San_Sebastian2141/2020 | EPI_SL_468866 | Servicio de Microbiología, Hospital Universitario Donostia. OSI Donostialdea. Área de Enfermedades Infecciosas, Grupo de Infección Respiratoria y Resistencia Antimicrobiana. Instituto de Investigación Sanitaria Biodonostia. | SeqCOVID-SPAIN consortium/IBV(CSIC)                                                                                                | 2020-04-12 | Gustavo Cilla et al                                                                                                              |
| SpainDonostia_San_Sebastian2145/2020 | EPI_SL_468941 | Servicio de Microbiología, Hospital Universitario Donostia. OSI Donostialdea. Área de Enfermedades Infecciosas, Grupo de Infección Respiratoria y Resistencia Antimicrobiana. Instituto de Investigación Sanitaria Biodonostia. | SeqCOVID-SPAIN consortium/IBV(CSIC)                                                                                                | 2020-04-12 | Gustavo Cilla et al                                                                                                              |
| SpainDonostia_San_Sebastian2146/2020 | EPI_SL_468870 | Servicio de Microbiología, Hospital Universitario Donostia. OSI Donostialdea. Área de Enfermedades Infecciosas, Grupo de Infección Respiratoria y Resistencia Antimicrobiana. Instituto de Investigación Sanitaria Biodonostia. | SeqCOVID-SPAIN consortium/IBV(CSIC)                                                                                                | 2020-04-12 | Gustavo Cilla et al                                                                                                              |

|                                       |                |                                                                                                                                                                                                                                 |                                                                                         |            |                                                                                                                                                  |
|---------------------------------------|----------------|---------------------------------------------------------------------------------------------------------------------------------------------------------------------------------------------------------------------------------|-----------------------------------------------------------------------------------------|------------|--------------------------------------------------------------------------------------------------------------------------------------------------|
| Spain/Donostia-San_Sebastian2147/2020 | EPI_ISL_468928 | Servicio de Microbiología, Hospital Universitario Donostia. OSI Donostialdea. Área de Enfermedades Infecciosas, Grupo de Infección Respiratoria y Resistencia Antimicrobiana. Instituto de Investigación Sanitaria Biodonostia. | SeqCOVID-SPAIN consortium/IBV(CSIC)                                                     | 2020-04-12 | Gustavo Cilla et al                                                                                                                              |
| Spain/Donostia-San_Sebastian2149/2020 | EPI_ISL_468913 | Servicio de Microbiología, Hospital Universitario Donostia. OSI Donostialdea. Área de Enfermedades Infecciosas, Grupo de Infección Respiratoria y Resistencia Antimicrobiana. Instituto de Investigación Sanitaria Biodonostia. | SeqCOVID-SPAIN consortium/IBV(CSIC)                                                     | 2020-04-12 | Gustavo Cilla et al                                                                                                                              |
| Spain/Donostia-San_Sebastian2152/2020 | EPI_ISL_468896 | Servicio de Microbiología, Hospital Universitario Donostia. OSI Donostialdea. Área de Enfermedades Infecciosas, Grupo de Infección Respiratoria y Resistencia Antimicrobiana. Instituto de Investigación Sanitaria Biodonostia. | SeqCOVID-SPAIN consortium/IBV(CSIC)                                                     | 2020-04-12 | Gustavo Cilla et al                                                                                                                              |
| Spain/Donostia-San_Sebastian2169/2020 | EPI_ISL_468875 | Servicio de Microbiología, Hospital Universitario Donostia. OSI Donostialdea. Área de Enfermedades Infecciosas, Grupo de Infección Respiratoria y Resistencia Antimicrobiana. Instituto de Investigación Sanitaria Biodonostia. | SeqCOVID-SPAIN consortium/IBV(CSIC)                                                     | 2020-04-12 | Gustavo Cilla et al                                                                                                                              |
| Spain/LaRoca201277/2020               | EPI_ISL_455338 | Hospital San Pedro                                                                                                                                                                                                              | Instituto de Salud Carlos III                                                           | 2020-02-29 | Iglesias-Caballero et al B                                                                                                                       |
| Spain/Madrid_H12_3203/2020            | EPI_ISL_428702 | Hospital Universitario 12 de Octubre                                                                                                                                                                                            | Hospital Universitario 12 de Octubre                                                    | 2020-03-11 | Esther Viedma et al                                                                                                                              |
| Spain/Madrid201105/2020               | EPI_ISL_418251 | HOSPITAL UNIVERSITARIO LA PAZ                                                                                                                                                                                                   | Instituto de Salud Carlos III                                                           | 2020-02-25 | Iglesias-Caballero et al A ( <a href="https://dx.doi.org/10.1101/2020.04.20.050009">https://dx.doi.org/10.1101/2020.04.20.050009</a> )           |
| Spain/PaisVasco201398/2020            | EPI_ISL_455351 | Hospital Txagintxu                                                                                                                                                                                                              | Instituto de Salud Carlos III                                                           | 2020-02-29 | Iglesias-Caballero et al B                                                                                                                       |
| Spain/Palma2583/2020                  | EPI_ISL_468907 | Servicio de Microbiología, Hospital Universitario Son Espases                                                                                                                                                                   | SeqCOVID-SPAIN consortium/IBV(CSIC)                                                     | 2020-04-15 | Caixa López-Causapé et al                                                                                                                        |
| Spain/Palma2588/2020                  | EPI_ISL_468906 | Servicio de Microbiología, Hospital Universitario Son Espases                                                                                                                                                                   | SeqCOVID-SPAIN consortium/IBV(CSIC)                                                     | 2020-04-13 | Caixa López-Causapé et al                                                                                                                        |
| Spain/Valecia174/2020                 | EPI_ISL_436269 | Servicio de Microbiología, Hospital Universitario Doctor Peset                                                                                                                                                                  | SeqCOVID-SPAIN consortium/IBV(CSIC)                                                     | 2020-03-20 | Juan Alberto Enguilanes et al                                                                                                                    |
| Spain/Valecia214/2020                 | EPI_ISL_436309 | Servicio de Microbiología, Hospital Clínico Universitario de Valencia                                                                                                                                                           | SeqCOVID-SPAIN consortium/IBV(CSIC)                                                     | 2020-03-28 | Vicente Soriano Chirona et al                                                                                                                    |
| Spain/Valecia232/2020                 | EPI_ISL_419687 | Servicio de Microbiología, Consorcio Hospital General Universitario de Valencia                                                                                                                                                 | SeqCOVID-SPAIN consortium/IBV(CSIC)                                                     | 2020-02-27 | Giuseppe D'Auria et al                                                                                                                           |
| Spain/Valecia252/2020                 | EPI_ISL_419689 | Servicio de Microbiología, Consorcio Hospital General Universitario de Valencia                                                                                                                                                 | SeqCOVID-SPAIN consortium/IBV(CSIC)                                                     | 2020-02-27 | Neris Garcia-Gonzalez et al                                                                                                                      |
| Spain/Valecia266/2020                 | EPI_ISL_436361 | Servicio de Microbiología, Consorcio Hospital General Universitario de Valencia                                                                                                                                                 | SeqCOVID-SPAIN consortium/IBV(CSIC)                                                     | 2020-02-29 | Neris Garcia-Gonzalez et al                                                                                                                      |
| Spain/Valecia269/2020                 | EPI_ISL_436364 | Servicio de Microbiología, Hospital Clínico Universitario de Valencia                                                                                                                                                           | SeqCOVID-SPAIN consortium/IBV(CSIC)                                                     | 2020-03-21 | Benitz Beaudou et al                                                                                                                             |
| Spain/Valecia274/2020                 | EPI_ISL_436369 | Servicio de Microbiología, Hospital Clínico Universitario de Valencia                                                                                                                                                           | SeqCOVID-SPAIN consortium/IBV(CSIC)                                                     | 2020-03-26 | Sandra Carbo et al                                                                                                                               |
| Spain/Valecia313/2020                 | EPI_ISL_436408 | Servicio de Microbiología, Hospital Clínico Universitario de Valencia                                                                                                                                                           | SeqCOVID-SPAIN consortium/IBV(CSIC)                                                     | 2020-03-25 | Neris Garcia-Gonzalez et al                                                                                                                      |
| Spain/Valecia319/2020                 | EPI_ISL_416483 | Servicio de Microbiología, Consorcio Hospital General Universitario de Valencia                                                                                                                                                 | SeqCOVID-SPAIN consortium/IBV(CSIC)                                                     | 2020-02-26 | Maria Alma Bracho et al                                                                                                                          |
| Spain/Valecia35/2020                  | EPI_ISL_416484 | Servicio de Microbiología, Consorcio Hospital General Universitario de Valencia                                                                                                                                                 | SeqCOVID-SPAIN consortium/IBV(CSIC)                                                     | 2020-02-27 | Maria Dolores Ocoete et al ( <a href="https://dx.doi.org/10.1101/2020.04.20.050009">https://dx.doi.org/10.1101/2020.04.20.050009</a> )           |
| Spain/Valecia50/2020                  | EPI_ISL_420131 | Servicio de Microbiología, Hospital Clínico Universitario de Valencia                                                                                                                                                           | SeqCOVID-SPAIN consortium/IBV(CSIC)                                                     | 2020-03-18 | Paula Ruiz-Husso et al                                                                                                                           |
| Spain/Valecia54/2020                  | EPI_ISL_425178 | Servicio de Microbiología, Consorcio Hospital General Universitario de Valencia                                                                                                                                                 | SeqCOVID-SPAIN consortium/IBV(CSIC)                                                     | 2020-02-28 | David Navarro et al                                                                                                                              |
| Spain/Valecia56/2020                  | EPI_ISL_447497 | Servicio de Microbiología, Hospital Clínico Universitario de Valencia                                                                                                                                                           | SeqCOVID-SPAIN consortium/IBV(CSIC)                                                     | 2020-03-27 | Lúcia Martínez-Priego et al                                                                                                                      |
| Spain/Valecia59/2020                  | EPI_ISL_447519 | Servicio de Microbiología, Hospital Clínico Universitario de Valencia                                                                                                                                                           | SeqCOVID-SPAIN consortium/IBV(CSIC)                                                     | 2020-04-01 | Sandra Carbo et al                                                                                                                               |
| Spain/Valecia60/2020                  | EPI_ISL_416485 | Servicio de Microbiología, Consorcio Hospital General Universitario de Valencia                                                                                                                                                 | SeqCOVID-SPAIN consortium/IBV(CSIC)                                                     | 2020-02-27 | Griselda De Marco et al ( <a href="https://dx.doi.org/10.1101/2020.04.20.050009">https://dx.doi.org/10.1101/2020.04.20.050009</a> )              |
| Spain/Valecia605/2020                 | EPI_ISL_447524 | Servicio de Microbiología, Hospital Clínico Universitario de Valencia                                                                                                                                                           | SeqCOVID-SPAIN consortium/IBV(CSIC)                                                     | 2020-04-01 | Lúcia Martínez-Priego et al                                                                                                                      |
| Spain/Valecia66/2020                  | EPI_ISL_425190 | Servicio de Microbiología, Consorcio Hospital General Universitario de Valencia                                                                                                                                                 | SeqCOVID-SPAIN consortium/IBV(CSIC)                                                     | 2020-03-16 | Vicente Soriano Chirona et al                                                                                                                    |
| Spain/Valecia88/2020                  | EPI_ISL_425212 | Servicio de Microbiología, Consorcio Hospital General Universitario de Valencia                                                                                                                                                 | SeqCOVID-SPAIN consortium/IBV(CSIC)                                                     | 2020-03-11 | David Navarro et al                                                                                                                              |
| Spain/Zaragoza2406/2020               | EPI_ISL_468806 | Servicio de Microbiología, Hospital Miguel Servet, Zaragoza                                                                                                                                                                     | SeqCOVID-SPAIN consortium/IBV(CSIC)                                                     | 2020-03-21 | Antonio Rezusta López et al                                                                                                                      |
| SiLanka/COV/38/2020                   | EPI_ISL_428670 | Centre for Dengue Research                                                                                                                                                                                                      | Centre for Dengue Research                                                              | 2020-03-16 | Chandima Jeevandara et al                                                                                                                        |
| SiLanka/COV/53/2020                   | EPI_ISL_428671 | Centre for Dengue Research                                                                                                                                                                                                      | Centre for Dengue Research                                                              | 2020-03-10 | Chandima Jeevandara et al                                                                                                                        |
| SiLanka/COV/91/2020                   | EPI_ISL_428672 | Centre for Dengue Research                                                                                                                                                                                                      | Centre for Dengue Research                                                              | 2020-03-19 | Chandima Jeevandara et al                                                                                                                        |
| Sweden/01/2020                        | EPI_ISL_411951 | HS mikrobiolog virus                                                                                                                                                                                                            | Unit for Laboratory Development and Technology Transfer, Public Health Agency of Sweden | 2020-02-07 | Bennygné et al ( <a href="https://doi.org/10.2807/1560-7917.ES.2002.25.13.2000090">https://doi.org/10.2807/1560-7917.ES.2002.25.13.2000090</a> ) |
| Sweden/20-04631/2020                  | EPI_ISL_430847 | HS mikrobiolog virus                                                                                                                                                                                                            | The Public Health Agency of Sweden                                                      | 2020-02-27 | Zhibing Yun et al                                                                                                                                |
| Sweden/20-05444/2020                  | EPI_ISL_445221 | Wasterfakama                                                                                                                                                                                                                    | The Public Health Agency of Sweden                                                      | 2020-03-11 | Frida Ahlfors et al                                                                                                                              |
| Sweden/20-05448/2020                  | EPI_ISL_434643 | Uppsala Narukat Ateris                                                                                                                                                                                                          | The Public Health Agency of Sweden                                                      | 2020-03-10 | Annika Nilsson et al                                                                                                                             |
| Sweden/20-05653/2020                  | EPI_ISL_434646 | Ulfuna Vardcentral                                                                                                                                                                                                              | The Public Health Agency of Sweden                                                      | 2020-03-12 | Heidi Lindback et al                                                                                                                             |
| Sweden/20-05856/2020                  | EPI_ISL_434649 | Svardsgjo VC                                                                                                                                                                                                                    | The Public Health Agency of Sweden                                                      | 2020-03-17 | Tommy Janes et al                                                                                                                                |
| Sweden/20-06468/2020                  | EPI_ISL_434655 | Uppsala Narukat Ateris                                                                                                                                                                                                          | The Public Health Agency of Sweden                                                      | 2020-03-25 | Annika Nilsson et al                                                                                                                             |
| Sweden/20-06665/2020                  | EPI_ISL_450808 | Saroledens Familjelakare                                                                                                                                                                                                        | The Public Health Agency of Sweden                                                      | 2020-03-31 | Katarina Jarbur et al                                                                                                                            |
| Sweden/20-06665/2020                  | EPI_ISL_450809 | Kungsholmsdoktom                                                                                                                                                                                                                | The Public Health Agency of Sweden                                                      | 2020-03-31 | Linus Hammar et al                                                                                                                               |
| Sweden/20-06814/2020                  | EPI_ISL_445228 | Ulfuna Vardcentral                                                                                                                                                                                                              | The Public Health Agency of Sweden                                                      | 2020-04-01 | Heidi Lindback et al                                                                                                                             |
| Sweden/20-06817/2020                  | EPI_ISL_445229 | Narhalsan Backa vardcentral                                                                                                                                                                                                     | The Public Health Agency of Sweden                                                      | 2020-04-01 | Mats Olsson et al                                                                                                                                |
| Sweden/20-06909/2020                  | EPI_ISL_450811 | Krivista VC                                                                                                                                                                                                                     | The Public Health Agency of Sweden                                                      | 2020-04-06 | Johanna Carlsson et al                                                                                                                           |
| Sweden/20-06928/2020                  | EPI_ISL_434660 | Narhalsan Backa vardcentral                                                                                                                                                                                                     | The Public Health Agency of Sweden                                                      | 2020-04-06 | Mats Olsson et al                                                                                                                                |
| Sweden/20-07010/2020                  | EPI_ISL_434661 | Omtanken Gimmered                                                                                                                                                                                                               | The Public Health Agency of Sweden                                                      | 2020-04-07 | Bernad Scngiel et al                                                                                                                             |
| Sweden/20-07025/2020                  | EPI_ISL_434663 | Surrunns VC                                                                                                                                                                                                                     | The Public Health Agency of Sweden                                                      | 2020-04-06 | Erik Embring et al                                                                                                                               |
| Sweden/20-07034/2020                  | EPI_ISL_434664 | Omtanken Gimmered                                                                                                                                                                                                               | The Public Health Agency of Sweden                                                      | 2020-04-06 | Bernad Scngiel et al                                                                                                                             |
| Sweden/20-07041/2020                  | EPI_ISL_450812 | Uppsala Narukat Ateris                                                                                                                                                                                                          | The Public Health Agency of Sweden                                                      | 2020-04-05 | Annika Nilsson et al                                                                                                                             |
| Sweden/20-07042/2020                  | EPI_ISL_434665 | Uppsala Narukat Ateris                                                                                                                                                                                                          | The Public Health Agency of Sweden                                                      | 2020-04-04 | Annika Nilsson et al                                                                                                                             |
| Sweden/20-07171/2020                  | EPI_ISL_434666 | Homefors Halsocentral                                                                                                                                                                                                           | The Public Health Agency of Sweden                                                      | 2020-04-08 | Camilla Eback et al                                                                                                                              |
| Sweden/20-07298/2020                  | EPI_ISL_434667 | Ulfuna Vardcentral                                                                                                                                                                                                              | The Public Health Agency of Sweden                                                      | 2020-04-14 | Heidi Lindback et al                                                                                                                             |
| Sweden/20-07377/2020                  | EPI_ISL_455101 | Jourcentralen                                                                                                                                                                                                                   | The Public Health Agency of Sweden                                                      | 2020-04-15 | Salvatore Ascione et al                                                                                                                          |
| Sweden/20-07389/2020                  | EPI_ISL_434668 | Kungors VC                                                                                                                                                                                                                      | The Public Health Agency of Sweden                                                      | 2020-04-15 | Jessica Karlsson et al                                                                                                                           |
| Sweden/20-07390/2020                  | EPI_ISL_434669 | Lakargruppen                                                                                                                                                                                                                    | The Public Health Agency of Sweden                                                      | 2020-04-15 | Boris Klanger et al                                                                                                                              |
| Sweden/20-07439/2020                  | EPI_ISL_434670 | Narhalsan Mohlykke, Barn och ungdomsmedicin                                                                                                                                                                                     | The Public Health Agency of Sweden                                                      | 2020-04-17 | Mats Reimer et al                                                                                                                                |
| Sweden/20-07440/2020                  | EPI_ISL_434671 | Narhalsan Sjøbo vardcentral                                                                                                                                                                                                     | The Public Health Agency of Sweden                                                      | 2020-04-16 | Lovisa Hjetten et al                                                                                                                             |
| Sweden/20-07586/2020                  | EPI_ISL_445236 | Wasterfakama                                                                                                                                                                                                                    | The Public Health Agency of Sweden                                                      | 2020-04-20 | Frida Ahlfors et al                                                                                                                              |
| Sweden/20-07607/2020                  | EPI_ISL_434675 | Surrunns VC                                                                                                                                                                                                                     | The Public Health Agency of Sweden                                                      | 2020-04-20 | Erik Embring et al                                                                                                                               |
| Sweden/20-07651/2020                  | EPI_ISL_445238 | Narhalsan Backa vardcentral                                                                                                                                                                                                     | The Public Health Agency of Sweden                                                      | 2020-04-21 | Mats Olsson et al                                                                                                                                |
| Sweden/20-07653/2020                  | EPI_ISL_445237 | Narhalsan Mohlykke, Barn och ungdomsmedicin                                                                                                                                                                                     | The Public Health Agency of Sweden                                                      | 2020-04-21 | Mats Reimer et al                                                                                                                                |
| Sweden/20-07672/2020                  | EPI_ISL_445239 | Uppsala Narukat Ateris                                                                                                                                                                                                          | The Public Health Agency of Sweden                                                      | 2020-04-19 | Annika Nilsson et al                                                                                                                             |
| Sweden/20-07737/2020                  | EPI_ISL_450815 | Narhalsan Mohlykke, Barn och ungdomsmedicin                                                                                                                                                                                     | The Public Health Agency of Sweden                                                      | 2020-04-23 | Mats Reimer et al                                                                                                                                |
| Sweden/20-07739/2020                  | EPI_ISL_450816 | orestadskliniken VC                                                                                                                                                                                                             | The Public Health Agency of Sweden                                                      | 2020-04-22 | Lisa Kjellberg / Laura Plavitu et al                                                                                                             |
| Sweden/20-07741/2020                  | EPI_ISL_445241 | Å-restadskliniken VC                                                                                                                                                                                                            | The Public Health Agency of Sweden                                                      | 2020-04-23 | Lisa Kjellberg / Laura Plavitu et al                                                                                                             |
| Sweden/20-07768/2020                  | EPI_ISL_450818 | Aneby VC                                                                                                                                                                                                                        | The Public Health Agency of Sweden                                                      | 2020-04-23 | Ken Granath et al                                                                                                                                |
| Sweden/20-07856/2020                  | EPI_ISL_452237 | Huddinge VC                                                                                                                                                                                                                     | The Public Health Agency of Sweden                                                      | 2020-04-23 | Anders Johansson et al                                                                                                                           |
| Sweden/20-07861/2020                  | EPI_ISL_450822 | Jarpens HC                                                                                                                                                                                                                      | The Public Health Agency of Sweden                                                      | 2020-04-23 | Gunnilla Johansson et al                                                                                                                         |
| Sweden/20-08065/2020                  | EPI_ISL_454459 | Karolinska Universitetlaboratoriet                                                                                                                                                                                              | The Public Health Agency of Sweden                                                      | 2020-03-05 | Anna-Malin Linde et al                                                                                                                           |
| Sweden/20-08096/2020                  | EPI_ISL_454468 | Karolinska Universitetlaboratoriet                                                                                                                                                                                              | The Public Health Agency of Sweden                                                      | 2020-03-06 | Anna-Malin Linde et al                                                                                                                           |
| Sweden/20-08107/2020                  | EPI_ISL_454478 | Karolinska Universitetlaboratoriet                                                                                                                                                                                              | The Public Health Agency of Sweden                                                      | 2020-03-08 | Anna-Malin Linde et al                                                                                                                           |
| Sweden/20-08108/2020                  | EPI_ISL_454479 | Karolinska Universitetlaboratoriet                                                                                                                                                                                              | The Public Health Agency of Sweden                                                      | 2020-03-09 | Anna-Malin Linde et al                                                                                                                           |
| Sweden/20-08109/2020                  | EPI_ISL_454480 | Karolinska Universitetlaboratoriet                                                                                                                                                                                              | The Public Health Agency of Sweden                                                      | 2020-03-09 | Anna-Malin Linde et al                                                                                                                           |
| Sweden/20-08121/2020                  | EPI_ISL_454491 | Karolinska Universitetlaboratoriet                                                                                                                                                                                              | The Public Health Agency of Sweden                                                      | 2020-03-09 | Anna-Malin Linde et al                                                                                                                           |
| Sweden/20-08128/2020                  | EPI_ISL_454443 | Halmstad klinik mikrobiologi                                                                                                                                                                                                    | The Public Health Agency of Sweden                                                      | 2020-03-10 | Anna-Malin Linde et al                                                                                                                           |
| Sweden/20-08149/2020                  | EPI_ISL_429120 | Klinik mikrobiologi och vardhygien Halmstad                                                                                                                                                                                     | The Public Health Agency of Sweden                                                      | 2020-03-11 | Arne Kotz et al                                                                                                                                  |
| Sweden/20-08173/2020                  | EPI_ISL_429125 | Klinik mikrobiologi och vardhygien Halmstad                                                                                                                                                                                     | The Public Health Agency of Sweden                                                      | 2020-03-12 | Arne Kotz et al                                                                                                                                  |
| Sweden/20-08320/2020                  | EPI_ISL_429126 | Unilabs Skovde                                                                                                                                                                                                                  | The Public Health Agency of Sweden                                                      | 2020-03-21 | Tobias Kollberg et al                                                                                                                            |
| Sweden/20-08686/2020                  | EPI_ISL_434642 | Laboratoriemedicin                                                                                                                                                                                                              | The Public Health Agency of Sweden                                                      | 2020-03-27 | Oskar Karlsson Lindso et al                                                                                                                      |
| Sweden/20-08717/2020                  | EPI_ISL_430859 | Laboratoriemedicin                                                                                                                                                                                                              | The Public Health Agency of Sweden                                                      | 2020-04-02 | Oskar Karlsson Lindso et al                                                                                                                      |
| Sweden/20-14013/2020                  | EPI_ISL_455103 | Huslakama Varmbadhuset Varberg                                                                                                                                                                                                  | The Public Health Agency of Sweden                                                      | 2020-04-27 | Johanna Hilmersson et al                                                                                                                         |
| Sweden/20-14087/2020                  | EPI_ISL_450828 | Uppsala Narukat Ateris                                                                                                                                                                                                          | The Public Health Agency of Sweden                                                      | 2020-04-27 | Annika Nilsson et al                                                                                                                             |
| Sweden/20-14262/2020                  | EPI_ISL_469055 | Jourcentralen                                                                                                                                                                                                                   | The Public Health Agency of Sweden                                                      | 2020-05-02 | Oskar Karlsson Lindso et al                                                                                                                      |
| Sweden/20-14317/2020                  | EPI_ISL_469056 | Jourcentralen                                                                                                                                                                                                                   | The Public Health Agency of Sweden                                                      | 2020-05-05 | Oskar Karlsson Lindso et al                                                                                                                      |
| Sweden/20-14318/2020                  | EPI_ISL_469057 | Inger Landgren                                                                                                                                                                                                                  | The Public Health Agency of Sweden                                                      | 2020-05-05 | Oskar Karlsson Lindso et al                                                                                                                      |
| Sweden/20-14377/2020                  | EPI_ISL_469058 | Narhalsan Sjøbo vardcentral                                                                                                                                                                                                     | The Public Health Agency of Sweden                                                      | 2020-05-07 | Oskar Karlsson Lindso et al                                                                                                                      |
| Sweden/20-14647/2020                  | EPI_ISL_469059 | Hovas Askim Familjelakare og BVC                                                                                                                                                                                                | The Public Health Agency of Sweden                                                      | 2020-05-14 | Oskar Karlsson Lindso et al                                                                                                                      |
| Sweden/20-14696/2020                  | EPI_ISL_469060 | Narhalsan Sjøbo vardcentral                                                                                                                                                                                                     | The Public Health Agency of Sweden                                                      | 2020-05-15 | Oskar Karlsson Lindso et al                                                                                                                      |
| Sweden/20-14697/2020                  | EPI_ISL_469061 | Narhalsan Sjøbo vardcentral                                                                                                                                                                                                     | The Public Health Agency of Sweden                                                      | 2020-05-15 | Oskar Karlsson Lindso et al                                                                                                                      |
| Sweden/20-14785/2020                  | EPI_ISL_469062 | Huddinge VC                                                                                                                                                                                                                     | The Public Health Agency of Sweden                                                      | 2020-05-15 | Oskar Karlsson Lindso et al                                                                                                                      |
| Sweden/20-14827/2020                  | EPI_ISL_469063 | Ulfuna Vardcentral                                                                                                                                                                                                              | The Public Health Agency of Sweden                                                      | 2020-05-19 | Oskar Karlsson Lindso et al                                                                                                                      |
| Sweden/20-19008/2020                  | EPI_ISL_469064 | Huddinge VC                                                                                                                                                                                                                     | The Public Health Agency of Sweden                                                      | 2020-05-27 | Oskar Karlsson Lindso et al                                                                                                                      |
| Sweden/20-19192/2020                  | EPI_ISL_469065 | Huddinge VC                                                                                                                                                                                                                     | The Public Health Agency of Sweden                                                      | 2020-05-28 | Oskar Karlsson Lindso et al                                                                                                                      |
| Sweden/20-20096/2020                  | EPI_ISL_454876 | Karolinska Universitetlaboratoriet                                                                                                                                                                                              | The Public Health Agency of Sweden                                                      | 2020-03-04 | Anna-Malin Linde et al                                                                                                                           |
| Sweden/20-20130/2020                  | EPI_ISL_429141 | Klinik mikrobiologi Orebro                                                                                                                                                                                                      | The Public Health Agency of Sweden                                                      | 2020-03-06 | Martin Sundqvist et al                                                                                                                           |
| Sweden/20-20149/2020                  | EPI_ISL_455859 | Karolinska Universitetlaboratoriet                                                                                                                                                                                              | The Public Health Agency of Sweden                                                      | 2020-03-04 | Anna-Malin Linde et al                                                                                                                           |
| Sweden/20-20180/2020                  | EPI_ISL_429153 | Klinik mikrobiologi Orebro                                                                                                                                                                                                      | The Public Health Agency of Sweden                                                      | 2020-03-08 | Martin Sundqvist et al                                                                                                                           |
| Sweden/20-20202/2020                  | EPI_ISL_455868 | Karolinska Universitetlaboratoriet                                                                                                                                                                                              | The Public Health Agency of Sweden                                                      | 2020-03-05 | Anna-Malin Linde et al                                                                                                                           |
| Sweden/20-20245/2020                  | EPI_ISL_455885 | Karolinska Universitetlaboratoriet                                                                                                                                                                                              | The Public Health Agency of Sweden                                                      | 2020-03-07 | Anna-Malin Linde et al                                                                                                                           |
| Sweden/20-20258/2020                  | EPI_ISL_455896 | Karolinska Universitetlaboratoriet                                                                                                                                                                                              | The Public Health Agency of Sweden                                                      | 2020-03-08 | Anna-Malin Linde et al                                                                                                                           |
| Sweden/20-20266/2020                  | EPI_ISL_455907 | Klinik mikrobiologi, UAS                                                                                                                                                                                                        | The Public Health Agency of Sweden                                                      | 2020-03-06 | Anna-Malin Linde et al                                                                                                                           |
| Sweden/20-20272/2020                  | EPI_ISL_455905 | Klinik mikrobiologi, UAS                                                                                                                                                                                                        | The Public Health Agency of Sweden                                                      | 2020-03-09 | Anna-Malin Linde et al                                                                                                                           |
| Sweden/20-20294/2020                  | EPI_ISL_454902 | Karolinska Universitetlaboratoriet                                                                                                                                                                                              | The Public Health Agency of Sweden                                                      | 2020-03-11 | Anna-Malin Linde et al                                                                                                                           |
| Sweden/20-20377/2020                  | EPI_ISL_429162 | The Public Health Agency of Sweden                                                                                                                                                                                              | The Public Health Agency of Sweden                                                      | 2020-03-15 | Olov Svartstrom et al                                                                                                                            |
| Sweden/20-21160/2020                  | EPI_ISL_452242 | Wernstedt Medical AB                                                                                                                                                                                                            | The Public Health Agency of Sweden                                                      | 2020-05-04 | Eva Sandberg et al                                                                                                                               |
| Sweden/20-21167/2020                  | EPI_ISL_450832 | Byrjorden vardcentral                                                                                                                                                                                                           | The Public Health Agency of Sweden                                                      | 2020-05-04 | Pernilla Brunman et al                                                                                                                           |
| Sweden/20-21264/2020                  | EPI_ISL_455104 | Ulfuna Vardcentral                                                                                                                                                                                                              | The Public Health Agency of Sweden                                                      | 2020-05-06 | Heidi Lindback et al                                                                                                                             |
| Sweden/20-21311/2020                  | EPI_ISL_450833 | Wetterhalsan                                                                                                                                                                                                                    | The Public Health Agency of Sweden                                                      | 2020-05-07 | Anders Tengblad et al                                                                                                                            |

|                           |                |                                                             |                                                                                                       |            |                                                                                                                                                                                                                                        |
|---------------------------|----------------|-------------------------------------------------------------|-------------------------------------------------------------------------------------------------------|------------|----------------------------------------------------------------------------------------------------------------------------------------------------------------------------------------------------------------------------------------|
| Sweden/20-51317/2020      | EPI_ISL_455106 | Wetterhälsan                                                | The Public Health Agency of Sweden                                                                    | 2020-05-07 | Anders Tengblad et al                                                                                                                                                                                                                  |
| Sweden/20-51349/2020      | EPI_ISL_455106 | Surrunns VC                                                 | The Public Health Agency of Sweden                                                                    | 2020-05-11 | Erik Embring et al                                                                                                                                                                                                                     |
| Sweden/20-51350/2020      | EPI_ISL_469066 | Surrunns VC                                                 | The Public Health Agency of Sweden                                                                    | 2020-05-11 | Oskar Karlsson Lindsoj et al                                                                                                                                                                                                           |
| Sweden/20-51387/2020      | EPI_ISL_455107 | Narhalsan Mellared                                          | The Public Health Agency of Sweden                                                                    | 2020-05-12 | Maria Nykvist et al                                                                                                                                                                                                                    |
| Sweden/20-51391/2020      | EPI_ISL_455108 | Smedby HC                                                   | The Public Health Agency of Sweden                                                                    | 2020-05-13 | Susanne Brunby et al                                                                                                                                                                                                                   |
| Sweden/20-51426/2020      | EPI_ISL_455109 | Ulfuna Vardcentral                                          | The Public Health Agency of Sweden                                                                    | 2020-05-13 | Heidi Lindback et al                                                                                                                                                                                                                   |
| Sweden/20-51445/2020      | EPI_ISL_455110 | Scania Halsocenter, B288                                    | The Public Health Agency of Sweden                                                                    | 2020-05-14 | Christina Lergin et al                                                                                                                                                                                                                 |
| Sweden/20-51474/2020      | EPI_ISL_455111 | Olof Norby                                                  | The Public Health Agency of Sweden                                                                    | 2020-05-14 | Bia Kustens halsocentral et al                                                                                                                                                                                                         |
| Sweden/20-51589/2020      | EPI_ISL_469067 | Kungsholmsdoktor                                            | The Public Health Agency of Sweden                                                                    | 2020-05-19 | Oskar Karlsson Lindsoj et al                                                                                                                                                                                                           |
| Sweden/20-51618/2020      | EPI_ISL_469068 | Hovas Akim Familjelakare och BVC                            | The Public Health Agency of Sweden                                                                    | 2020-05-20 | Oskar Karlsson Lindsoj et al                                                                                                                                                                                                           |
| Sweden/20-51678/2020      | EPI_ISL_469069 | Narhalsan Oskrokens VC                                      | The Public Health Agency of Sweden                                                                    | 2020-05-25 | Oskar Karlsson Lindsoj et al                                                                                                                                                                                                           |
| Sweden/20-51703/2020      | EPI_ISL_469070 | Surrunns VC                                                 | The Public Health Agency of Sweden                                                                    | 2020-05-26 | Oskar Karlsson Lindsoj et al                                                                                                                                                                                                           |
| Sweden/20-51758/2020      | EPI_ISL_469071 | Wastefakama                                                 | The Public Health Agency of Sweden                                                                    | 2020-05-27 | Oskar Karlsson Lindsoj et al                                                                                                                                                                                                           |
| Sweden/20-51891/2020      | EPI_ISL_469072 | Ulfuna Vardcentral                                          | The Public Health Agency of Sweden                                                                    | 2020-06-03 | Oskar Karlsson Lindsoj et al                                                                                                                                                                                                           |
| Sweden/RV-FOI-1/2020      | EPI_ISL_424703 | Klinisk mikrobiologi, Region Västerbotten                   | Unit for Biological Agents, Department for CBRN Defence and Security, Swedish Defence Research Agency | 2020-03-15 | FOI Bioinformatics team et al                                                                                                                                                                                                          |
| Switzerland/10009/2020    | EPI_ISL_466934 | Viollier AG                                                 | Department of Biosystems Science and Engineering, ETH Zurich                                          | 2020-03-05 | Christian Beisel et al                                                                                                                                                                                                                 |
| Switzerland/10019/2020    | EPI_ISL_466943 | Viollier AG                                                 | Department of Biosystems Science and Engineering, ETH Zurich                                          | 2020-03-09 | Christian Beisel et al                                                                                                                                                                                                                 |
| Switzerland/10028/2020    | EPI_ISL_466952 | Viollier AG                                                 | Department of Biosystems Science and Engineering, ETH Zurich                                          | 2020-03-10 | Christian Beisel et al                                                                                                                                                                                                                 |
| Switzerland/10037/2020    | EPI_ISL_466961 | Viollier AG                                                 | Department of Biosystems Science and Engineering, ETH Zurich                                          | 2020-03-11 | Christian Beisel et al                                                                                                                                                                                                                 |
| Switzerland/10042/2020    | EPI_ISL_466965 | Viollier AG                                                 | Department of Biosystems Science and Engineering, ETH Zurich                                          | 2020-03-11 | Christian Beisel et al                                                                                                                                                                                                                 |
| Switzerland/10047/2020    | EPI_ISL_413020 | Department of Internal Medicine, Triemli Hospital           | Institute of Medical Virology, University of Zurich                                                   | 2020-02-27 | Stefan Schmutz et al B ( <a href="https://virological.org/phylodynamic-analysis-based-on-11-genomes-from-the-italian-outbreak420">https://virological.org/phylodynamic-analysis-based-on-11-genomes-from-the-italian-outbreak420</a> ) |
| Switzerland/10047757/2020 | EPI_ISL_413021 | Klinik Hirslanden Zurich                                    | Institute of Medical Virology, University of Zurich                                                   | 2020-02-29 | Stefan Schmutz et al C ( <a href="https://doi.org/10.1002/jmv.25773">https://doi.org/10.1002/jmv.25773</a> )                                                                                                                           |
| Switzerland/10047796/2020 | EPI_ISL_413022 | Division of Infectious Diseases, University Hospital Zurich | Institute of Medical Virology, University of Zurich                                                   | 2020-02-29 | Stefan Schmutz et al C ( <a href="https://doi.org/10.1002/jmv.25773">https://doi.org/10.1002/jmv.25773</a> )                                                                                                                           |
| Switzerland/10047797/2020 | EPI_ISL_413023 | Division of Infectious Diseases, University Hospital Zurich | Institute of Medical Virology, University of Zurich                                                   | 2020-02-29 | Stefan Schmutz et al C ( <a href="https://doi.org/10.1002/jmv.25773">https://doi.org/10.1002/jmv.25773</a> )                                                                                                                           |
| Switzerland/10047798/2020 | EPI_ISL_413024 | Division of Infectious Diseases, University Hospital Zurich | Institute of Medical Virology, University of Zurich                                                   | 2020-02-29 | Stefan Schmutz et al C ( <a href="https://doi.org/10.1002/jmv.25773">https://doi.org/10.1002/jmv.25773</a> )                                                                                                                           |
| Switzerland/10065/2020    | EPI_ISL_466977 | Viollier AG                                                 | Department of Biosystems Science and Engineering, ETH Zurich                                          | 2020-03-12 | Christian Beisel et al                                                                                                                                                                                                                 |
| Switzerland/10066/2020    | EPI_ISL_466985 | Viollier AG                                                 | Department of Biosystems Science and Engineering, ETH Zurich                                          | 2020-03-12 | Christian Beisel et al                                                                                                                                                                                                                 |
| Switzerland/10072/2020    | EPI_ISL_466994 | Viollier AG                                                 | Department of Biosystems Science and Engineering, ETH Zurich                                          | 2020-03-12 | Christian Beisel et al                                                                                                                                                                                                                 |
| Switzerland/100127/2020   | EPI_ISL_451711 | Viollier AG                                                 | Department of Biosystems Science and Engineering, ETH Zurich                                          | 2020-03-16 | Christian Beisel et al                                                                                                                                                                                                                 |
| Switzerland/100796/2020   | EPI_ISL_451748 | Viollier AG                                                 | Department of Biosystems Science and Engineering, ETH Zurich                                          | 2020-03-25 | Christian Beisel et al                                                                                                                                                                                                                 |
| Switzerland/100811/2020   | EPI_ISL_451781 | Viollier AG                                                 | Department of Biosystems Science and Engineering, ETH Zurich                                          | 2020-03-26 | Christian Beisel et al                                                                                                                                                                                                                 |
| Switzerland/100823/2020   | EPI_ISL_451772 | Viollier AG                                                 | Department of Biosystems Science and Engineering, ETH Zurich                                          | 2020-03-26 | Christian Beisel et al                                                                                                                                                                                                                 |
| Switzerland/100830/2020   | EPI_ISL_451778 | Viollier AG                                                 | Department of Biosystems Science and Engineering, ETH Zurich                                          | 2020-03-26 | Christian Beisel et al                                                                                                                                                                                                                 |
| Switzerland/100834/2020   | EPI_ISL_451782 | Viollier AG                                                 | Department of Biosystems Science and Engineering, ETH Zurich                                          | 2020-03-25 | Christian Beisel et al                                                                                                                                                                                                                 |
| Switzerland/100846/2020   | EPI_ISL_451793 | Viollier AG                                                 | Department of Biosystems Science and Engineering, ETH Zurich                                          | 2020-03-25 | Christian Beisel et al                                                                                                                                                                                                                 |
| Switzerland/101140/2020   | EPI_ISL_451807 | Viollier AG                                                 | Department of Biosystems Science and Engineering, ETH Zurich                                          | 2020-03-31 | Christian Beisel et al                                                                                                                                                                                                                 |
| Switzerland/101141/2020   | EPI_ISL_451808 | Viollier AG                                                 | Department of Biosystems Science and Engineering, ETH Zurich                                          | 2020-03-31 | Christian Beisel et al                                                                                                                                                                                                                 |
| Switzerland/101146/2020   | EPI_ISL_451813 | Viollier AG                                                 | Department of Biosystems Science and Engineering, ETH Zurich                                          | 2020-03-31 | Christian Beisel et al                                                                                                                                                                                                                 |
| Switzerland/101160/2020   | EPI_ISL_451826 | Viollier AG                                                 | Department of Biosystems Science and Engineering, ETH Zurich                                          | 2020-03-31 | Christian Beisel et al                                                                                                                                                                                                                 |
| Switzerland/101172/2020   | EPI_ISL_451835 | Viollier AG                                                 | Department of Biosystems Science and Engineering, ETH Zurich                                          | 2020-03-31 | Christian Beisel et al                                                                                                                                                                                                                 |
| Switzerland/101178/2020   | EPI_ISL_451840 | Viollier AG                                                 | Department of Biosystems Science and Engineering, ETH Zurich                                          | 2020-03-31 | Christian Beisel et al                                                                                                                                                                                                                 |
| Switzerland/101190/2020   | EPI_ISL_451852 | Viollier AG                                                 | Department of Biosystems Science and Engineering, ETH Zurich                                          | 2020-03-31 | Christian Beisel et al                                                                                                                                                                                                                 |
| Switzerland/10429/2020    | EPI_ISL_451858 | Viollier AG                                                 | Department of Biosystems Science and Engineering, ETH Zurich                                          | 2020-04-07 | Christian Beisel et al                                                                                                                                                                                                                 |
| Switzerland/10448/2020    | EPI_ISL_451869 | Viollier AG                                                 | Department of Biosystems Science and Engineering, ETH Zurich                                          | 2020-04-07 | Christian Beisel et al                                                                                                                                                                                                                 |
| Switzerland/10450/2020    | EPI_ISL_451870 | Viollier AG                                                 | Department of Biosystems Science and Engineering, ETH Zurich                                          | 2020-04-07 | Christian Beisel et al                                                                                                                                                                                                                 |
| Switzerland/10454/2020    | EPI_ISL_451874 | Viollier AG                                                 | Department of Biosystems Science and Engineering, ETH Zurich                                          | 2020-04-07 | Christian Beisel et al                                                                                                                                                                                                                 |
| Switzerland/10459/2020    | EPI_ISL_451878 | Viollier AG                                                 | Department of Biosystems Science and Engineering, ETH Zurich                                          | 2020-04-07 | Christian Beisel et al                                                                                                                                                                                                                 |
| Switzerland/10460/2020    | EPI_ISL_451879 | Viollier AG                                                 | Department of Biosystems Science and Engineering, ETH Zurich                                          | 2020-04-07 | Christian Beisel et al                                                                                                                                                                                                                 |
| Switzerland/10464/2020    | EPI_ISL_451882 | Viollier AG                                                 | Department of Biosystems Science and Engineering, ETH Zurich                                          | 2020-04-07 | Christian Beisel et al                                                                                                                                                                                                                 |
| Switzerland/10467/2020    | EPI_ISL_451885 | Viollier AG                                                 | Department of Biosystems Science and Engineering, ETH Zurich                                          | 2020-04-06 | Christian Beisel et al                                                                                                                                                                                                                 |
| Switzerland/10470/2020    | EPI_ISL_451888 | Viollier AG                                                 | Department of Biosystems Science and Engineering, ETH Zurich                                          | 2020-04-06 | Christian Beisel et al                                                                                                                                                                                                                 |
| Switzerland/10478/2020    | EPI_ISL_451890 | Viollier AG                                                 | Department of Biosystems Science and Engineering, ETH Zurich                                          | 2020-04-07 | Christian Beisel et al                                                                                                                                                                                                                 |
| Switzerland/10480/2020    | EPI_ISL_451892 | Viollier AG                                                 | Department of Biosystems Science and Engineering, ETH Zurich                                          | 2020-04-07 | Christian Beisel et al                                                                                                                                                                                                                 |
| Switzerland/10486/2020    | EPI_ISL_451898 | Viollier AG                                                 | Department of Biosystems Science and Engineering, ETH Zurich                                          | 2020-04-07 | Christian Beisel et al                                                                                                                                                                                                                 |
| Switzerland/12001/2020    | EPI_ISL_468202 | Viollier AG                                                 | Department of Biosystems Science and Engineering, ETH Zurich                                          | 2020-04-17 | Christian Beisel et al                                                                                                                                                                                                                 |
| Switzerland/120035/2020   | EPI_ISL_468225 | Viollier AG                                                 | Department of Biosystems Science and Engineering, ETH Zurich                                          | 2020-04-19 | Christian Beisel et al                                                                                                                                                                                                                 |
| Switzerland/120039/2020   | EPI_ISL_468228 | Viollier AG                                                 | Department of Biosystems Science and Engineering, ETH Zurich                                          | 2020-04-20 | Christian Beisel et al                                                                                                                                                                                                                 |
| Switzerland/120040/2020   | EPI_ISL_468229 | Viollier AG                                                 | Department of Biosystems Science and Engineering, ETH Zurich                                          | 2020-04-20 | Christian Beisel et al                                                                                                                                                                                                                 |
| Switzerland/120047/2020   | EPI_ISL_468234 | Viollier AG                                                 | Department of Biosystems Science and Engineering, ETH Zurich                                          | 2020-04-20 | Christian Beisel et al                                                                                                                                                                                                                 |
| Switzerland/120166/2020   | EPI_ISL_468244 | Viollier AG                                                 | Department of Biosystems Science and Engineering, ETH Zurich                                          | 2020-04-26 | Christian Beisel et al                                                                                                                                                                                                                 |
| Switzerland/120168/2020   | EPI_ISL_468246 | Viollier AG                                                 | Department of Biosystems Science and Engineering, ETH Zurich                                          | 2020-04-26 | Christian Beisel et al                                                                                                                                                                                                                 |
| Switzerland/120175/2020   | EPI_ISL_468252 | Viollier AG                                                 | Department of Biosystems Science and Engineering, ETH Zurich                                          | 2020-04-27 | Christian Beisel et al                                                                                                                                                                                                                 |
| Switzerland/120179/2020   | EPI_ISL_468255 | Viollier AG                                                 | Department of Biosystems Science and Engineering, ETH Zurich                                          | 2020-04-27 | Christian Beisel et al                                                                                                                                                                                                                 |
| Switzerland/120182/2020   | EPI_ISL_468257 | Viollier AG                                                 | Department of Biosystems Science and Engineering, ETH Zurich                                          | 2020-04-27 | Christian Beisel et al                                                                                                                                                                                                                 |
| Switzerland/120183/2020   | EPI_ISL_468258 | Viollier AG                                                 | Department of Biosystems Science and Engineering, ETH Zurich                                          | 2020-04-27 | Christian Beisel et al                                                                                                                                                                                                                 |
| Switzerland/120188/2020   | EPI_ISL_468263 | Viollier AG                                                 | Department of Biosystems Science and Engineering, ETH Zurich                                          | 2020-04-27 | Christian Beisel et al                                                                                                                                                                                                                 |
| Switzerland/120192/2020   | EPI_ISL_468267 | Viollier AG                                                 | Department of Biosystems Science and Engineering, ETH Zurich                                          | 2020-04-27 | Christian Beisel et al                                                                                                                                                                                                                 |
| Switzerland/120206/2020   | EPI_ISL_468279 | Viollier AG                                                 | Department of Biosystems Science and Engineering, ETH Zurich                                          | 2020-04-27 | Christian Beisel et al                                                                                                                                                                                                                 |
| Switzerland/120207/2020   | EPI_ISL_468280 | Viollier AG                                                 | Department of Biosystems Science and Engineering, ETH Zurich                                          | 2020-04-28 | Christian Beisel et al                                                                                                                                                                                                                 |
| Switzerland/12023/2020    | EPI_ISL_468285 | Viollier AG                                                 | Department of Biosystems Science and Engineering, ETH Zurich                                          | 2020-04-30 | Christian Beisel et al                                                                                                                                                                                                                 |
| Switzerland/120237/2020   | EPI_ISL_468288 | Viollier AG                                                 | Department of Biosystems Science and Engineering, ETH Zurich                                          | 2020-05-01 | Christian Beisel et al                                                                                                                                                                                                                 |
| Switzerland/120238/2020   | EPI_ISL_468289 | Viollier AG                                                 | Department of Biosystems Science and Engineering, ETH Zurich                                          | 2020-05-01 | Christian Beisel et al                                                                                                                                                                                                                 |
| Switzerland/120239/2020   | EPI_ISL_468290 | Viollier AG                                                 | Department of Biosystems Science and Engineering, ETH Zurich                                          | 2020-05-01 | Christian Beisel et al                                                                                                                                                                                                                 |
| Switzerland/120230/2020   | EPI_ISL_468291 | Viollier AG                                                 | Department of Biosystems Science and Engineering, ETH Zurich                                          | 2020-05-01 | Christian Beisel et al                                                                                                                                                                                                                 |
| Switzerland/120232/2020   | EPI_ISL_468293 | Viollier AG                                                 | Department of Biosystems Science and Engineering, ETH Zurich                                          | 2020-05-01 | Christian Beisel et al                                                                                                                                                                                                                 |
| Switzerland/120233/2020   | EPI_ISL_468294 | Viollier AG                                                 | Department of Biosystems Science and Engineering, ETH Zurich                                          | 2020-05-01 | Christian Beisel et al                                                                                                                                                                                                                 |
| Switzerland/120234/2020   | EPI_ISL_468295 | Viollier AG                                                 | Department of Biosystems Science and Engineering, ETH Zurich                                          | 2020-05-01 | Christian Beisel et al                                                                                                                                                                                                                 |
| Switzerland/120235/2020   | EPI_ISL_468296 | Viollier AG                                                 | Department of Biosystems Science and Engineering, ETH Zurich                                          | 2020-05-01 | Christian Beisel et al                                                                                                                                                                                                                 |
| Switzerland/120236/2020   | EPI_ISL_468297 | Viollier AG                                                 | Department of Biosystems Science and Engineering, ETH Zurich                                          | 2020-05-01 | Christian Beisel et al                                                                                                                                                                                                                 |
| Switzerland/120237/2020   | EPI_ISL_468298 | Viollier AG                                                 | Department of Biosystems Science and Engineering, ETH Zurich                                          | 2020-05-01 | Christian Beisel et al                                                                                                                                                                                                                 |
| Switzerland/120238/2020   | EPI_ISL_468299 | Viollier AG                                                 | Department of Biosystems Science and Engineering, ETH Zurich                                          | 2020-05-01 | Christian Beisel et al                                                                                                                                                                                                                 |
| Switzerland/120241/2020   | EPI_ISL_468301 | Viollier AG                                                 | Department of Biosystems Science and Engineering, ETH Zurich                                          | 2020-05-04 | Christian Beisel et al                                                                                                                                                                                                                 |
| Switzerland/120242/2020   | EPI_ISL_468302 | Viollier AG                                                 | Department of Biosystems Science and Engineering, ETH Zurich                                          | 2020-05-04 | Christian Beisel et al                                                                                                                                                                                                                 |
| Switzerland/120244/2020   | EPI_ISL_468303 | Viollier AG                                                 | Department of Biosystems Science and Engineering, ETH Zurich                                          | 2020-05-04 | Christian Beisel et al                                                                                                                                                                                                                 |
| Switzerland/13001/2020    | EPI_ISL_466997 | Viollier AG                                                 | Department of Biosystems Science and Engineering, ETH Zurich                                          | 2020-05-05 | Christian Beisel et al                                                                                                                                                                                                                 |
| Switzerland/13003/2020    | EPI_ISL_466999 | Viollier AG                                                 | Department of Biosystems Science and Engineering, ETH Zurich                                          | 2020-05-05 | Christian Beisel et al                                                                                                                                                                                                                 |
| Switzerland/13004/2020    | EPI_ISL_467000 | Viollier AG                                                 | Department of Biosystems Science and Engineering, ETH Zurich                                          | 2020-05-05 | Christian Beisel et al                                                                                                                                                                                                                 |
| Switzerland/13005/2020    | EPI_ISL_467001 | Viollier AG                                                 | Department of Biosystems Science and Engineering, ETH Zurich                                          | 2020-05-06 | Christian Beisel et al                                                                                                                                                                                                                 |
| Switzerland/13006/2020    | EPI_ISL_467002 | Viollier AG                                                 | Department of Biosystems Science and Engineering, ETH Zurich                                          | 2020-05-06 | Christian Beisel et al                                                                                                                                                                                                                 |
| Switzerland/13007/2020    | EPI_ISL_467003 | Viollier AG                                                 | Department of Biosystems Science and Engineering, ETH Zurich                                          | 2020-05-06 | Christian Beisel et al                                                                                                                                                                                                                 |
| Switzerland/13008/2020    | EPI_ISL_467004 | Viollier AG                                                 | Department of Biosystems Science and Engineering, ETH Zurich                                          | 2020-05-06 | Christian Beisel et al                                                                                                                                                                                                                 |
| Switzerland/13012/2020    | EPI_ISL_467006 | Viollier AG                                                 | Department of Biosystems Science and Engineering, ETH Zurich                                          | 2020-05-07 | Christian Beisel et al                                                                                                                                                                                                                 |
| Switzerland/13013/2020    | EPI_ISL_467007 | Viollier AG                                                 | Department of Biosystems Science and Engineering, ETH Zurich                                          | 2020-05-07 | Christian Beisel et al                                                                                                                                                                                                                 |
| Switzerland/13014/2020    | EPI_ISL_467008 | Viollier AG                                                 | Department of Biosystems Science and Engineering, ETH Zurich                                          | 2020-05-07 | Christian Beisel et al                                                                                                                                                                                                                 |
| Switzerland/13018/2020    | EPI_ISL_467010 | Viollier AG                                                 | Department of Biosystems Science and Engineering, ETH Zurich                                          | 2020-05-08 | Christian Beisel et al                                                                                                                                                                                                                 |
| Switzerland/13020/2020    | EPI_ISL_467012 | Viollier AG                                                 | Department of Biosystems Science and Engineering, ETH Zurich                                          | 2020-05-08 | Christian Beisel et al                                                                                                                                                                                                                 |
| Switzerland/13021/2020    | EPI_ISL_467013 | Viollier AG                                                 | Department of Biosystems Science and Engineering, ETH Zurich                                          | 2020-05-11 | Christian Beisel et al                                                                                                                                                                                                                 |
| Switzerland/13026/2020    | EPI_ISL_467014 | Viollier AG                                                 | Department of Biosystems Science and Engineering, ETH Zurich                                          | 2020-05-12 | Christian Beisel et al                                                                                                                                                                                                                 |
| Switzerland/13028/2020    | EPI_ISL_467015 | Viollier AG                                                 | Department of Biosystems Science and Engineering, ETH Zurich                                          | 2020-05-13 | Christian Beisel et al                                                                                                                                                                                                                 |
| Switzerland/13032/2020    | EPI_ISL_467016 | Viollier AG                                                 | Department of Biosystems Science and Engineering, ETH Zurich                                          | 2020-05-13 | Christian Beisel et al                                                                                                                                                                                                                 |
| Switzerland/4216917/2020  | EPI_ISL_418271 | University Hospital Basel, Clinical Virology                | University Hospital Basel, Labormedizin                                                               | 2020-02-27 | Hirsch et al                                                                                                                                                                                                                           |
| Switzerland/4216930/2020  | EPI_ISL_418275 | University Hospital Basel, Clinical Virology                | University Hospital Basel, Clinical Bacteriology                                                      | 2020-02-27 | Hirsch et al                                                                                                                                                                                                                           |
| Switzerland/4216947/2020  | EPI_ISL_418273 | University Hospital Basel, Clinical Virology                | University Hospital Basel, Labormedizin                                                               | 2020-02-28 | Hirsch et al                                                                                                                                                                                                                           |
| Switzerland/42170345/2020 | EPI_ISL_418274 | University Hospital Basel, Clinical Virology                | University Hospital Basel, Clinical Bacteriology                                                      | 2020-02-28 | Hirsch et al                                                                                                                                                                                                                           |
| Switzerland/42174724/2020 | EPI_ISL_418277 | University Hospital Basel, Clinical Virology                | University Hospital Basel, Clinical Bacteriology                                                      | 2020-03-03 | Hirsch et al                                                                                                                                                                                                                           |
| Switzerland/42175220/2020 | EPI_ISL_418280 | University Hospital Basel, Clinical Virology                | University Hospital Basel, Clinical Bacteriology                                                      | 2020-03-03 | Hirsch et al                                                                                                                                                                                                                           |
| Switzerland/42176560/2020 | EPI_ISL_418283 | University Hospital Basel, Clinical Virology                | University Hospital Basel, Clinical Bacteriology                                                      | 2020-03-04 | Hirsch et al                                                                                                                                                                                                                           |
| Switzerland/42176771/2020 | EPI_ISL_418285 | University Hospital Basel, Clinical Virology                | University Hospital Basel, Clinical Bacteriology                                                      | 2020-03-04 | Hirsch et al                                                                                                                                                                                                                           |
| Switzerland/42177236/2020 | EPI_ISL_418433 | University Hospital Basel, Clinical Virology                | University Hospital Basel, Clinical Bacteriology                                                      | 2020-03-05 | Hirsch et al                                                                                                                                                                                                                           |
| Switzerland/42177472/2020 | EPI_ISL_418436 | University Hospital Basel, Clinical Virology                | University Hospital Basel, Clinical Virology                                                          | 2020-03-05 | Hirsch et al                                                                                                                                                                                                                           |
| Switzerland/AG0361/2020   | EPI_ISL_413999 | Laboratoire de Virologie, HUG                               | Swiss National Reference Centre for Influenza                                                         | 2020-02-27 | LAUBSCHER Florian et al                                                                                                                                                                                                                |
| Switzerland/AG7120/2020   | EPI_ISL_415457 | Hôpitaux universitaires de Genève Laboratoire de Virologie  | Hôpitaux universitaires de Genève Laboratoire de Virologie                                            | 2020-02-29 | Laubscher F. et al                                                                                                                                                                                                                     |
| Switzerland/BE6651/2020   | EPI_ISL_415456 | Hôpitaux universitaires de Genève Laboratoire de Virologie  | Hôpitaux universitaires de Genève Laboratoire de Virologie                                            | 2020-02-29 | Laubscher F. et al                                                                                                                                                                                                                     |
| Switzerland/BL0902/2020   | EPI_ISL_414021 | Laboratoire de Virologie, HUG                               | Swiss National Reference Centre for Influenza                                                         | 2020-02-27 | LAUBSCHER Florian et al                                                                                                                                                                                                                |
| Switzerland/GE0198/2020   | EPI_ISL_415455 | Hôpitaux universitaires de Genève Laboratoire de Virologie  | Hôpitaux universitaires de Genève Laboratoire de Virologie                                            | 2020-02-28 | Laubscher F. et al                                                                                                                                                                                                                     |
| Switzerland/GE0304/2020   | EPI_ISL_429218 | University Hospitals of Geneva Laboratory of Virology       | University Hospitals of Geneva Laboratory of Virology                                                 | 2020-04-02 | Laubscher F. et al                                                                                                                                                                                                                     |

|                                 |                |                                                                        |                                                                                                                                                                                                                     |            |                                                                                                                                                                |
|---------------------------------|----------------|------------------------------------------------------------------------|---------------------------------------------------------------------------------------------------------------------------------------------------------------------------------------------------------------------|------------|----------------------------------------------------------------------------------------------------------------------------------------------------------------|
| Switzerland/GE1184/2020         | EPI_ISL_429207 | University Hospitals of Geneva Laboratory of Virology                  | University Hospitals of Geneva Laboratory of Virology                                                                                                                                                               | 2020-04-03 | Laubacher F. et al                                                                                                                                             |
| Switzerland/GE1402/2020         | EPI_ISL_415700 | Hôpitaux universitaires de Genève Laboratoire de Virologie             | Hôpitaux universitaires de Genève Laboratoire de Virologie                                                                                                                                                          | 2020-02-28 | Laubacher F. et al                                                                                                                                             |
| Switzerland/GE1422/2020         | EPI_ISL_415454 | Hôpitaux universitaires de Genève Laboratoire de Virologie             | Hôpitaux universitaires de Genève Laboratoire de Virologie                                                                                                                                                          | 2020-02-28 | Laubacher F. et al                                                                                                                                             |
| Switzerland/GE3121/2020         | EPI_ISL_414019 | Laboratoire de Virologie, HUG                                          | Swiss National Reference Centre for Influenza                                                                                                                                                                       | 2020-02-27 | LAUBSCHER Florian et al                                                                                                                                        |
| Switzerland/GE3144/2020         | EPI_ISL_423916 | University Hospitals of Geneva Laboratory of Virology                  | University Hospitals of Geneva Laboratory of Virology                                                                                                                                                               | 2020-03-18 | Laubacher F. et al                                                                                                                                             |
| Switzerland/GE3895/2020         | EPI_ISL_413997 | Laboratoire de Virologie, HUG                                          | Swiss National Reference Centre for Influenza                                                                                                                                                                       | 2020-02-26 | LAUBSCHER Florian et al                                                                                                                                        |
| Switzerland/GE5373/2020         | EPI_ISL_414020 | Laboratoire de Virologie, HUG                                          | Swiss National Reference Centre for Influenza                                                                                                                                                                       | 2020-02-27 | LAUBSCHER Florian et al                                                                                                                                        |
| Switzerland/GE5737/2020         | EPI_ISL_429200 | University Hospitals of Geneva Laboratory of Virology                  | University Hospitals of Geneva Laboratory of Virology                                                                                                                                                               | 2020-03-19 | Laubacher F. et al                                                                                                                                             |
| Switzerland/GE5886/2020         | EPI_ISL_414022 | Laboratoire de Virologie, HUG                                          | Swiss National Reference Centre for Influenza                                                                                                                                                                       | 2020-02-27 | LAUBSCHER Florian et al                                                                                                                                        |
| Switzerland/GR2988/2020         | EPI_ISL_415698 | Hôpitaux universitaires de Genève Laboratoire de Virologie             | Hôpitaux universitaires de Genève Laboratoire de Virologie                                                                                                                                                          | 2020-02-27 | Laubacher F. et al                                                                                                                                             |
| Switzerland/GR3043/2020         | EPI_ISL_415699 | Hôpitaux universitaires de Genève Laboratoire de Virologie             | Hôpitaux universitaires de Genève Laboratoire de Virologie                                                                                                                                                          | 2020-02-27 | Laubacher F. et al                                                                                                                                             |
| Switzerland/TI9486/2020         | EPI_ISL_413996 | Laboratoire de Virologie, HUG                                          | Swiss National Reference Centre for Influenza                                                                                                                                                                       | 2020-02-24 | LAUBSCHER Florian et al                                                                                                                                        |
| Switzerland/VD0503/2020         | EPI_ISL_415459 | Hôpitaux universitaires de Genève Laboratoire de Virologie             | Hôpitaux universitaires de Genève Laboratoire de Virologie                                                                                                                                                          | 2020-02-29 | Laubacher F. et al                                                                                                                                             |
| Taiwan/NT08/2020                | EPI_ISL_429883 | Centers for Disease Control, R.O.C. (Taiwan)                           | Centers for Disease Control, R.O.C. (Taiwan)                                                                                                                                                                        | 2020-03-23 | Ji-Rong Yang et al A                                                                                                                                           |
| Taiwan/NT20/2020                | EPI_ISL_420083 | Centers for Disease Control, R.O.C. (Taiwan)                           | Centers for Disease Control, R.O.C. (Taiwan)                                                                                                                                                                        | 2020-03-18 | Ji-Rong Yang et al A                                                                                                                                           |
| Taiwan/NT44/2020                | EPI_ISL_421641 | Centers for Disease Control, R.O.C. (Taiwan)                           | Centers for Disease Control, R.O.C. (Taiwan)                                                                                                                                                                        | 2020-03-19 | Ji-Rong Yang et al A                                                                                                                                           |
| Taiwan/NT70/2020                | EPI_ISL_420084 | Centers for Disease Control, R.O.C. (Taiwan)                           | Centers for Disease Control, R.O.C. (Taiwan)                                                                                                                                                                        | 2020-03-21 | Ji-Rong Yang et al A                                                                                                                                           |
| Taiwan/NT20/2020                | EPI_ISL_420631 | Centers for Disease Control, R.O.C. (Taiwan)                           | Centers for Disease Control, R.O.C. (Taiwan)                                                                                                                                                                        | 2020-01-23 | Ji-Rong Yang et al C ( <a href="https://dx.doi.org/10.1099/acmi.0.000133">https://dx.doi.org/10.1099/acmi.0.000133</a> )                                       |
| Taiwan/NT25/2020                | EPI_ISL_421651 | Centers for Disease Control, R.O.C. (Taiwan)                           | Centers for Disease Control, R.O.C. (Taiwan)                                                                                                                                                                        | 2020-03-22 | Ji-Rong Yang et al A                                                                                                                                           |
| Taiwan/NT3/2020                 | EPI_ISL_411926 | Taiwan Centers for Disease Control                                     | Taiwan Centers for Disease Control                                                                                                                                                                                  | 2020-01-24 | Ji-Rong Yang et al A                                                                                                                                           |
| Taiwan/NT4/2020                 | EPI_ISL_411927 | Taiwan Centers for Disease Control                                     | Taiwan Centers for Disease Control                                                                                                                                                                                  | 2020-01-28 | Ji-Rong Yang et al B ( <a href="https://dx.doi.org/10.2807/1560-7917.ES.2020.25.13.20000920">https://dx.doi.org/10.2807/1560-7917.ES.2020.25.13.20000920</a> ) |
| Taiwan/NT5/2020                 | EPI_ISL_429489 | Centers for Disease Control, R.O.C. (Taiwan)                           | Centers for Disease Control, R.O.C. (Taiwan)                                                                                                                                                                        | 2020-01-31 | Ji-Rong Yang et al A                                                                                                                                           |
| Taiwan/NT8/2020                 | EPI_ISL_429488 | Centers for Disease Control, R.O.C. (Taiwan)                           | Centers for Disease Control, R.O.C. (Taiwan)                                                                                                                                                                        | 2020-01-31 | Ji-Rong Yang et al A                                                                                                                                           |
| Taiwan/CGMH-CGU-01/2020         | EPI_ISL_411915 | Laboratory Medicine                                                    | Department of Laboratory Medicine, Lin-Kou Chang Gung Memorial Hospital, Taoyuan, Taiwan                                                                                                                            | 2020-01-25 | Kuo-Chien Tsao et al                                                                                                                                           |
| Taiwan/CGMH-CGU-02/2020         | EPI_ISL_417518 | Laboratory Medicine                                                    | Department of Laboratory Medicine, Lin-Kou Chang Gung Memorial Hospital, Taoyuan, Taiwan                                                                                                                            | 2020-02-04 | Kuo-Chien Tsao et al                                                                                                                                           |
| Taiwan/CGMH-CGU-03/2020         | EPI_ISL_415741 | Laboratory Medicine                                                    | Department of Laboratory Medicine, Lin-Kou Chang Gung Memorial Hospital, Taoyuan, Taiwan                                                                                                                            | 2020-02-26 | Kuo-Chien Tsao et al                                                                                                                                           |
| Taiwan/CGMH-CGU-04/2020         | EPI_ISL_415742 | Laboratory Medicine                                                    | Department of Laboratory Medicine, Lin-Kou Chang Gung Memorial Hospital, Taoyuan, Taiwan                                                                                                                            | 2020-02-27 | Kuo-Chien Tsao et al                                                                                                                                           |
| Taiwan/CGMH-CGU-05/2020         | EPI_ISL_415743 | Laboratory Medicine                                                    | Department of Laboratory Medicine, Lin-Kou Chang Gung Memorial Hospital, Taoyuan, Taiwan                                                                                                                            | 2020-02-27 | Kuo-Chien Tsao et al                                                                                                                                           |
| Taiwan/CGMH-CGU-07/2020         | EPI_ISL_417520 | Laboratory Medicine                                                    | Department of Laboratory Medicine, Lin-Kou Chang Gung Memorial Hospital, Taoyuan, Taiwan                                                                                                                            | 2020-03-09 | Kuo-Chien Tsao et al                                                                                                                                           |
| Taiwan/CGMH-CGU-08/2020         | EPI_ISL_417521 | Laboratory Medicine                                                    | Department of Laboratory Medicine, Lin-Kou Chang Gung Memorial Hospital, Taoyuan, Taiwan                                                                                                                            | 2020-03-10 | Kuo-Chien Tsao et al                                                                                                                                           |
| Taiwan/CGMH-CGU-14/2020         | EPI_ISL_424970 | Laboratory Medicine                                                    | Department of Laboratory Medicine, Lin-Kou Chang Gung Memorial Hospital, Taoyuan, Taiwan                                                                                                                            | 2020-03-17 | Kuo-Chien Tsao et al                                                                                                                                           |
| Taiwan/CGMH-CGU-16/2020         | EPI_ISL_424972 | Laboratory Medicine                                                    | Department of Laboratory Medicine, Lin-Kou Chang Gung Memorial Hospital, Taoyuan, Taiwan                                                                                                                            | 2020-03-16 | Kuo-Chien Tsao et al                                                                                                                                           |
| Taiwan/CGMH-CGU-19/2020         | EPI_ISL_424975 | Laboratory Medicine                                                    | Department of Laboratory Medicine, Lin-Kou Chang Gung Memorial Hospital, Taoyuan, Taiwan                                                                                                                            | 2020-03-18 | Kuo-Chien Tsao et al                                                                                                                                           |
| Taiwan/CGMH-CGU-21/2020         | EPI_ISL_444274 | Laboratory Medicine                                                    | Department of Laboratory Medicine, Lin-Kou Chang Gung Memorial Hospital, Taoyuan, Taiwan                                                                                                                            | 2020-02-29 | Kuo-Chien Tsao et al                                                                                                                                           |
| Taiwan/CGMH-CGU-23/2020         | EPI_ISL_444276 | Laboratory Medicine                                                    | Department of Laboratory Medicine, Lin-Kou Chang Gung Memorial Hospital, Taoyuan, Taiwan                                                                                                                            | 2020-03-21 | Kuo-Chien Tsao et al                                                                                                                                           |
| Taiwan/CGMH-CGU-25/2020         | EPI_ISL_444278 | Laboratory Medicine                                                    | Department of Laboratory Medicine, Lin-Kou Chang Gung Memorial Hospital, Taoyuan, Taiwan                                                                                                                            | 2020-03-20 | Kuo-Chien Tsao et al                                                                                                                                           |
| Taiwan/CGMH-CGU-26/2020         | EPI_ISL_452178 | Laboratory Medicine                                                    | Department of Laboratory Medicine, Lin-Kou Chang Gung Memorial Hospital, Taoyuan, Taiwan                                                                                                                            | 2020-04-19 | Kuo-Chien Tsao et al                                                                                                                                           |
| Taiwan/CGMH-CGU-27/2020         | EPI_ISL_452179 | Laboratory Medicine                                                    | Department of Laboratory Medicine, Lin-Kou Chang Gung Memorial Hospital, Taoyuan, Taiwan                                                                                                                            | 2020-04-19 | Kuo-Chien Tsao et al                                                                                                                                           |
| Taiwan/CGMH-CGU-30/2020         | EPI_ISL_464094 | Laboratory Medicine                                                    | Department of Laboratory Medicine, Lin-Kou Chang Gung Memorial Hospital, Taoyuan, Taiwan                                                                                                                            | 2020-04-11 | Kuo-Chien Tsao et al                                                                                                                                           |
| Taiwan/NTU01/2020               | EPI_ISL_408489 | Department of Laboratory Medicine, National Taiwan University Hospital | Microbial Genomics Core Lab, National Taiwan University Centers of Genomic and Precision Medicine                                                                                                                   | 2020-01-31 | Shiou-Hwei Yeh et al B                                                                                                                                         |
| Taiwan/NTU02/2020               | EPI_ISL_410218 | Department of Laboratory Medicine, National Taiwan University Hospital | Microbial Genomics Core Lab, National Taiwan University Centers of Genomic and Precision Medicine                                                                                                                   | 2020-02-05 | Shiou-Hwei Yeh et al A ( <a href="http://bioRxiv.org/lookup/doi/10.1101/2020.04.01.019483">http://bioRxiv.org/lookup/doi/10.1101/2020.04.01.019483</a> )       |
| Taiwan/NTU04/2020               | EPI_ISL_422407 | Department of Laboratory Medicine, National Taiwan University Hospital | Microbial Genomics Core Lab, National Taiwan University Centers of Genomic and Precision Medicine                                                                                                                   | 2020-03-04 | Shiou-Hwei Yeh et al B                                                                                                                                         |
| Taiwan/NTU07/2020               | EPI_ISL_422410 | Department of Laboratory Medicine, National Taiwan University Hospital | Microbial Genomics Core Lab, National Taiwan University Centers of Genomic and Precision Medicine                                                                                                                   | 2020-03-13 | Shiou-Hwei Yeh et al B                                                                                                                                         |
| Taiwan/NTU22/2020               | EPI_ISL_447616 | Department of Laboratory Medicine, National Taiwan University Hospital | Microbial Genomics Core Lab, National Taiwan University Centers of Genomic and Precision Medicine                                                                                                                   | 2020-03-21 | Shiou-Hwei Yeh et al B                                                                                                                                         |
| Taiwan/NTU23/2020               | EPI_ISL_447617 | Department of Laboratory Medicine, National Taiwan University Hospital | Microbial Genomics Core Lab, National Taiwan University Centers of Genomic and Precision Medicine                                                                                                                   | 2020-03-25 | Shiou-Hwei Yeh et al B                                                                                                                                         |
| Taiwan/NTU24/2020               | EPI_ISL_447618 | Department of Laboratory Medicine, National Taiwan University Hospital | Microbial Genomics Core Lab, National Taiwan University Centers of Genomic and Precision Medicine                                                                                                                   | 2020-03-25 | Shiou-Hwei Yeh et al B                                                                                                                                         |
| Taiwan/NTU26/2020               | EPI_ISL_447620 | Department of Laboratory Medicine, National Taiwan University Hospital | Microbial Genomics Core Lab, National Taiwan University Centers of Genomic and Precision Medicine                                                                                                                   | 2020-03-30 | Shiou-Hwei Yeh et al B                                                                                                                                         |
| Taiwan/NTU27/2020               | EPI_ISL_447621 | Department of Laboratory Medicine, National Taiwan University Hospital | Microbial Genomics Core Lab, National Taiwan University Centers of Genomic and Precision Medicine                                                                                                                   | 2020-04-13 | Shiou-Hwei Yeh et al B                                                                                                                                         |
| Taiwan/NTU28/2020               | EPI_ISL_447622 | Department of Laboratory Medicine, National Taiwan University Hospital | Microbial Genomics Core Lab, National Taiwan University Centers of Genomic and Precision Medicine                                                                                                                   | 2020-04-27 | Shiou-Hwei Yeh et al B                                                                                                                                         |
| Taiwan/NTU29/2020               | EPI_ISL_463007 | Department of Laboratory Medicine, National Taiwan University Hospital | Microbial Genomics Core Lab, National Taiwan University Centers of Genomic and Precision Medicine                                                                                                                   | 2020-04-12 | Shiou-Hwei Yeh et al B                                                                                                                                         |
| Taiwan/TSGH-04/2020             | EPI_ISL_428632 | TSGH-CP molecular lab                                                  | TSGH-CP molecular lab                                                                                                                                                                                               | 2020-03-17 | Cheng-Lih Peng et al                                                                                                                                           |
| Taiwan/TSGH-05/2020             | EPI_ISL_427392 | TSGH-CP molecular lab                                                  | TSGH-CP molecular lab                                                                                                                                                                                               | 2020-03-14 | Cheng-Lih Peng et al                                                                                                                                           |
| Taiwan/TSGH-07/2020             | EPI_ISL_427394 | TSGH-CP molecular lab                                                  | TSGH-CP molecular lab                                                                                                                                                                                               | 2020-03-22 | Cheng-Lih Peng et al                                                                                                                                           |
| Taiwan/TSGH-08/2020             | EPI_ISL_427395 | TSGH-CP molecular lab                                                  | TSGH-CP molecular lab                                                                                                                                                                                               | 2020-03-23 | Cheng-Lih Peng et al                                                                                                                                           |
| Taiwan/TSGH-14/2020             | EPI_ISL_428231 | TSGH-CP molecular lab                                                  | TSGH-CP molecular lab                                                                                                                                                                                               | 2020-03-24 | Cheng-Lih Peng et al                                                                                                                                           |
| Taiwan/TSGH-16/2020             | EPI_ISL_436101 | TSGH-CP molecular lab                                                  | TSGH-CP molecular lab                                                                                                                                                                                               | 2020-03-19 | Cheng-Lih Peng et al                                                                                                                                           |
| Taiwan/TSGH-17/2020             | EPI_ISL_436102 | TSGH-CP molecular lab                                                  | TSGH-CP molecular lab                                                                                                                                                                                               | 2020-03-19 | Cheng-Lih Peng et al                                                                                                                                           |
| Taiwan/TSGH-18/2020             | EPI_ISL_436103 | TSGH-CP molecular lab                                                  | TSGH-CP molecular lab                                                                                                                                                                                               | 2020-03-24 | Cheng-Lih Peng et al                                                                                                                                           |
| Taiwan/TSGH-21/2020             | EPI_ISL_436106 | TSGH-CP molecular lab                                                  | TSGH-CP molecular lab                                                                                                                                                                                               | 2020-03-30 | Cheng-Lih Peng et al                                                                                                                                           |
| Taiwan/TSGH-22/2020             | EPI_ISL_436107 | TSGH-CP molecular lab                                                  | TSGH-CP molecular lab                                                                                                                                                                                               | 2020-03-31 | Cheng-Lih Peng et al                                                                                                                                           |
| Taiwan/TSGH-23/2020             | EPI_ISL_436108 | TSGH-CP molecular lab                                                  | TSGH-CP molecular lab                                                                                                                                                                                               | 2020-04-02 | Cheng-Lih Peng et al                                                                                                                                           |
| Taiwan/TSGH-24/2020             | EPI_ISL_436099 | TSGH-CP molecular lab                                                  | TSGH-CP molecular lab                                                                                                                                                                                               | 2020-04-02 | Cheng-Lih Peng et al                                                                                                                                           |
| Taiwan/TSGH-26/2020             | EPI_ISL_447252 | TSGH-CP molecular lab                                                  | TSGH-CP molecular lab                                                                                                                                                                                               | 2020-02-25 | Cheng-Lih Peng et al                                                                                                                                           |
| Taiwan/TSGH-27/2020             | EPI_ISL_447253 | TSGH-CP molecular lab                                                  | TSGH-CP molecular lab                                                                                                                                                                                               | 2020-03-11 | Cheng-Lih Peng et al                                                                                                                                           |
| Taiwan/TSGH-28/2020             | EPI_ISL_447254 | TSGH-CP molecular lab                                                  | TSGH-CP molecular lab                                                                                                                                                                                               | 2020-03-16 | Cheng-Lih Peng et al                                                                                                                                           |
| Taiwan/TSGH-34/2020             | EPI_ISL_447593 | TSGH-CP molecular lab                                                  | TSGH-CP molecular lab                                                                                                                                                                                               | 2020-04-01 | Cheng-Lih Peng et al                                                                                                                                           |
| Taiwan/TSGH-35/2020             | EPI_ISL_457726 | TSGH-CP molecular lab                                                  | TSGH-CP molecular lab                                                                                                                                                                                               | 2020-02-06 | Cheng-Lih Peng et al                                                                                                                                           |
| Taiwan/TSGH-37/2020             | EPI_ISL_457733 | TSGH-CP molecular lab                                                  | TSGH-CP molecular lab                                                                                                                                                                                               | 2020-02-08 | Cheng-Lih Peng et al                                                                                                                                           |
| Thailand/61/2020                | EPI_ISL_403962 | Banrasasradura Hospital                                                | 1. Department of Medical Sciences, Ministry of Public Health, Thailand 2. Thai Red Cross Emerging Infectious Diseases - Health Science Centre 3. Department of Disease Control, Ministry of Public Health, Thailand | 2020-01-08 | Pitiluk et al B ( <a href="https://dx.doi.org/10.2807/1560-7917.ES.2020.25.8.2000097">https://dx.doi.org/10.2807/1560-7917.ES.2020.25.8.2000097</a> )          |
| Thailand/74/2020                | EPI_ISL_403963 | Banrasasradura Hospital                                                | 1. Department of Medical Sciences, Ministry of Public Health, Thailand 2. Thai Red Cross Emerging Infectious Diseases - Health Science Centre 3. Department of Disease Control, Ministry of Public Health, Thailand | 2020-01-13 | Pitiluk et al B ( <a href="https://dx.doi.org/10.2807/1560-7917.ES.2020.25.8.2000097">https://dx.doi.org/10.2807/1560-7917.ES.2020.25.8.2000097</a> )          |
| Thailand/Bangkok_168/2020       | EPI_ISL_450196 | bunnungrad international hospital                                      | National Institute of Health, Department of medical Sciences, Ministry of Public Health, Thailand                                                                                                                   | 2020-01-23 | Pitiluk et al A                                                                                                                                                |
| Thailand/Bangkok_269/2020       | EPI_ISL_447915 |                                                                        | Ministry of Public Health, Thailand                                                                                                                                                                                 | 2020-01-26 | Pitiluk et al A                                                                                                                                                |
| Thailand/Bangkok_323/2020       | EPI_ISL_447916 |                                                                        | National Institute of Health, Department of medical Sciences, Ministry of Public Health, Thailand                                                                                                                   | 2020-01-29 | Pitiluk et al A                                                                                                                                                |
| Thailand/Bangkok-0021/2020      | EPI_ISL_423042 | Ramathodi Hospital                                                     | COVID-19 Network Investigations (CONI) Alliance                                                                                                                                                                     | 2020-03-24 | Elizabeth Batty et al B ( <a href="https://dx.doi.org/10.1101/2020.05.22.20108498">https://dx.doi.org/10.1101/2020.05.22.20108498</a> )                        |
| Thailand/Bangkok-0042/2020      | EPI_ISL_429178 | Ramathodi Hospital                                                     | COVID-19 Network Investigations (CONI) Alliance                                                                                                                                                                     | 2020-03-28 | Elizabeth Batty et al B ( <a href="https://dx.doi.org/10.1101/2020.05.22.20108498">https://dx.doi.org/10.1101/2020.05.22.20108498</a> )                        |
| Thailand/Bangkok-0046/2020      | EPI_ISL_429182 | Ramathodi Hospital                                                     | COVID-19 Network Investigations (CONI) Alliance                                                                                                                                                                     | 2020-03-28 | Elizabeth Batty et al B ( <a href="https://dx.doi.org/10.1101/2020.05.22.20108498">https://dx.doi.org/10.1101/2020.05.22.20108498</a> )                        |
| Thailand/Bangkok-0048/2020      | EPI_ISL_429184 | Ramathodi Hospital                                                     | COVID-19 Network Investigations (CONI) Alliance                                                                                                                                                                     | 2020-03-28 | Elizabeth Batty et al B ( <a href="https://dx.doi.org/10.1101/2020.05.22.20108498">https://dx.doi.org/10.1101/2020.05.22.20108498</a> )                        |
| Thailand/Bangkok-0055/2020      | EPI_ISL_446997 | Ramathodi Hospital                                                     | COVID-19 Network Investigations (CONI) Alliance                                                                                                                                                                     | 2020-03-28 | Elizabeth Batty et al A                                                                                                                                        |
| Thailand/Bangkok-0056/2020      | EPI_ISL_446998 | Ramathodi Hospital                                                     | COVID-19 Network Investigations (CONI) Alliance                                                                                                                                                                     | 2020-03-28 | Elizabeth Batty et al A                                                                                                                                        |
| Thailand/Bangkok-0070/2020      | EPI_ISL_447012 | Ramathodi Hospital                                                     | COVID-19 Network Investigations (CONI) Alliance                                                                                                                                                                     | 2020-03-30 | Elizabeth Batty et al A                                                                                                                                        |
| Thailand/Bangkok-0073/2020      | EPI_ISL_447014 | Ramathodi Hospital                                                     | COVID-19 Network Investigations (CONI) Alliance                                                                                                                                                                     | 2020-03-03 | Elizabeth Batty et al A                                                                                                                                        |
| Thailand/Bangkok-0077/2020      | EPI_ISL_447018 | Ramathodi Hospital                                                     | COVID-19 Network Investigations (CONI) Alliance                                                                                                                                                                     | 2020-04-01 | Elizabeth Batty et al A                                                                                                                                        |
| Thailand/Bangkok-0078/2020      | EPI_ISL_447019 | Ramathodi Hospital                                                     | COVID-19 Network Investigations (CONI) Alliance                                                                                                                                                                     | 2020-04-01 | Elizabeth Batty et al A                                                                                                                                        |
| Thailand/Bangkok-0081/2020      | EPI_ISL_447022 | Ramathodi Hospital                                                     | COVID-19 Network Investigations (CONI) Alliance                                                                                                                                                                     | 2020-04-02 | Elizabeth Batty et al A                                                                                                                                        |
| Thailand/Bangkok-0082/2020      | EPI_ISL_447023 | Ramathodi Hospital                                                     | COVID-19 Network Investigations (CONI) Alliance                                                                                                                                                                     | 2020-04-02 | Elizabeth Batty et al A                                                                                                                                        |
| Thailand/Bangkok-0084/2020      | EPI_ISL_447025 | Ramathodi Hospital                                                     | COVID-19 Network Investigations (CONI) Alliance                                                                                                                                                                     | 2020-04-02 | Elizabeth Batty et al A                                                                                                                                        |
| Thailand/Bangkok-0087/2020      | EPI_ISL_447027 | Ramathodi Hospital                                                     | COVID-19 Network Investigations (CONI) Alliance                                                                                                                                                                     | 2020-04-06 | Elizabeth Batty et al A                                                                                                                                        |
| Thailand/Bangkok-0088/2020      | EPI_ISL_447028 | Ramathodi Hospital                                                     | COVID-19 Network Investigations (CONI) Alliance                                                                                                                                                                     | 2020-04-07 | Elizabeth Batty et al A                                                                                                                                        |
| Thailand/Bangkok-COON-0097/2020 | EPI_ISL_458026 | Hospital for Tropical Diseases                                         | COVID-19 Network Investigations (CONI) Alliance                                                                                                                                                                     | 2020-04-02 | Elizabeth Batty et al A                                                                                                                                        |
| Thailand/Bangkok-COON-0098/2020 | EPI_ISL_458027 | Hospital for Tropical Diseases                                         | COVID-19 Network Investigations (CONI) Alliance                                                                                                                                                                     | 2020-04-03 | Elizabeth Batty et al A                                                                                                                                        |
| Thailand/Bangkok-COON-0099/2020 | EPI_ISL_458028 | Hospital for Tropical Diseases                                         | COVID-19 Network Investigations (CONI) Alliance                                                                                                                                                                     | 2020-04-04 | Elizabeth Batty et al A                                                                                                                                        |
| Thailand/Bangkok-COON-0117/2020 | EPI_ISL_455919 | Ramathodi Hospital                                                     | COVID-19 Network Investigations (CONI) Alliance                                                                                                                                                                     | 2020-03-12 | Elizabeth Batty et al A                                                                                                                                        |
| Thailand/Bangkok-COON-0127/2020 | EPI_ISL_455921 | Ramathodi Hospital                                                     | COVID-19 Network Investigations (CONI) Alliance                                                                                                                                                                     | 2020-03-12 | Elizabeth Batty et al A                                                                                                                                        |
| Thailand/Bangkok-COON-0149/2020 | EPI_ISL_455943 | Ramathodi Hospital                                                     | COVID-19 Network Investigations (CONI) Alliance                                                                                                                                                                     | 2020-03-15 | Elizabeth Batty et al A                                                                                                                                        |
| Thailand/NH-15/2020             | EPI_ISL_434692 | Banrasasradura hospital                                                | National Institute of Health, Department of medical Sciences, Ministry of Public Health, Thailand                                                                                                                   | 2020-01-05 | Pitiluk et al A                                                                                                                                                |
| Thailand/NH-162/2020            | EPI_ISL_434694 | Banrasasradura hospital                                                | National Institute of Health, Department of medical Sciences, Ministry of Public Health, Thailand                                                                                                                   | 2020-01-22 | Pitiluk et al A                                                                                                                                                |
| Thailand/NH-190/2020            | EPI_ISL_434695 |                                                                        | Ministry of Public Health, Thailand                                                                                                                                                                                 | 2020-01-22 | Pitiluk et al A                                                                                                                                                |
| Thailand/NH-2294/2020           | EPI_ISL_434698 | Param 9 Hospital                                                       | National Institute of Health, Department of medical Sciences, Ministry of Public Health, Thailand                                                                                                                   | 2020-03-13 | Pitiluk et al A                                                                                                                                                |
| Thailand/NH-59/2020             | EPI_ISL_434693 | Banrasasradura hospital                                                | National Institute of Health, Department of medical Sciences, Ministry of Public Health, Thailand                                                                                                                   | 2020-01-16 | Pitiluk et al A                                                                                                                                                |
| Thailand/Nonhaburi_3472/2020    | EPI_ISL_455593 |                                                                        | National Institute of Health, Department of medical Sciences, Ministry of Public Health, Thailand                                                                                                                   | 2020-03-20 | Pitiluk et al A                                                                                                                                                |
| Thailand/Nonhaburi_363/2020     | EPI_ISL_447917 |                                                                        | National Institute of Health, Department of medical Sciences, Ministry of Public Health, Thailand                                                                                                                   | 2020-01-29 | Pitiluk et al A                                                                                                                                                |
| Thailand/Nonhaburi_59/2020      | EPI_ISL_447909 |                                                                        | National Institute of Health, Department of medical Sciences, Ministry of Public Health, Thailand                                                                                                                   | 2020-01-13 | Pitiluk et al A                                                                                                                                                |
| Thailand/Nonhaburi_69/2020      | EPI_ISL_447910 |                                                                        | National Institute of Health, Department of medical Sciences, Ministry of Public Health, Thailand                                                                                                                   | 2020-01-15 | Pitiluk et al A                                                                                                                                                |
| Thailand/Phuket_247/2020        | EPI_ISL_447914 |                                                                        | National Institute of Health, Department of medical Sciences, Ministry of Public Health, Thailand                                                                                                                   | 2020-01-25 | Pitiluk et al A                                                                                                                                                |
| Thailand/Samutprakam_849/2020   | EPI_ISL_447919 |                                                                        | National Institute of Health, Department of medical Sciences, Ministry of Public Health, Thailand                                                                                                                   | 2020-02-04 | Pitiluk et al A                                                                                                                                                |
| Thailand/S200040-NT7/2020       | EPI_ISL_437623 |                                                                        | Faculty of Medicine                                                                                                                                                                                                 | 2020-01-08 | Rodpan et al                                                                                                                                                   |
| Thailand/S200383-NT7/2020       | EPI_ISL_437622 |                                                                        | Faculty of Medicine                                                                                                                                                                                                 | 2020-01-23 | Rodpan et al                                                                                                                                                   |



|                               |                |                                                                                                               |                                                                                                                  |            |                                                                                                                                             |
|-------------------------------|----------------|---------------------------------------------------------------------------------------------------------------|------------------------------------------------------------------------------------------------------------------|------------|---------------------------------------------------------------------------------------------------------------------------------------------|
| ThailandS200433-NT2020        | EPI_ISL_437621 |                                                                                                               | Faculty of Medicine                                                                                              | 2020-01-25 | Rodpan et al                                                                                                                                |
| ThailandS200478-NT2020        | EPI_ISL_437619 |                                                                                                               | Faculty of Medicine                                                                                              | 2020-01-26 | Rodpan et al                                                                                                                                |
| ThailandS200615-NT2020        | EPI_ISL_437618 |                                                                                                               | Faculty of Medicine                                                                                              | 2020-01-29 | Rodpan et al                                                                                                                                |
| ThailandS200893-NT2020        | EPI_ISL_437624 |                                                                                                               | Faculty of Medicine                                                                                              | 2020-02-01 | Rodpan et al                                                                                                                                |
| ThailandS201712-NT2020        | EPI_ISL_437617 |                                                                                                               | Faculty of Medicine                                                                                              | 2020-02-03 | Rodpan et al                                                                                                                                |
| Timor-LesteTL052020           | EPI_ISL_456597 | National Health Laboratory, Timor-Leste                                                                       | Microbiological Diagnostic Unit Public Health Laboratory, The Peter Doherty Institute for Infection and Immunity | 2020-04-11 | Soares da Silva et al                                                                                                                       |
| Timor-LesteTL062020           | EPI_ISL_456598 | National Health Laboratory, Timor-Leste                                                                       | Microbiological Diagnostic Unit Public Health Laboratory, The Peter Doherty Institute for Infection and Immunity | 2020-04-11 | Soares da Silva et al                                                                                                                       |
| Timor-LesteTL072020           | EPI_ISL_456606 | National Health Laboratory, Timor-Leste                                                                       | Microbiological Diagnostic Unit Public Health Laboratory, The Peter Doherty Institute for Infection and Immunity | 2020-04-11 | Soares da Silva et al                                                                                                                       |
| Timor-LesteTL142020           | EPI_ISL_456601 | National Health Laboratory, Timor-Leste                                                                       | Microbiological Diagnostic Unit Public Health Laboratory, The Peter Doherty Institute for Infection and Immunity | 2020-04-12 | Soares da Silva et al                                                                                                                       |
| Timor-LesteTL152020           | EPI_ISL_456602 | National Health Laboratory, Timor-Leste                                                                       | Microbiological Diagnostic Unit Public Health Laboratory, The Peter Doherty Institute for Infection and Immunity | 2020-04-12 | Soares da Silva et al                                                                                                                       |
| Timor-LesteTL162020           | EPI_ISL_456604 | National Health Laboratory, Timor-Leste                                                                       | Microbiological Diagnostic Unit Public Health Laboratory, The Peter Doherty Institute for Infection and Immunity | 2020-04-12 | Soares da Silva et al                                                                                                                       |
| Timor-LesteTL172020           | EPI_ISL_456605 | National Health Laboratory, Timor-Leste                                                                       | Microbiological Diagnostic Unit Public Health Laboratory, The Peter Doherty Institute for Infection and Immunity | 2020-04-12 | Soares da Silva et al                                                                                                                       |
| Timor-LesteTL182020           | EPI_ISL_456608 | National Health Laboratory, Timor-Leste                                                                       | Microbiological Diagnostic Unit Public Health Laboratory, The Peter Doherty Institute for Infection and Immunity | 2020-04-12 | Soares da Silva et al                                                                                                                       |
| Timor-LesteTL192020           | EPI_ISL_456610 | National Health Laboratory, Timor-Leste                                                                       | Microbiological Diagnostic Unit Public Health Laboratory, The Peter Doherty Institute for Infection and Immunity | 2020-04-12 | Soares da Silva et al                                                                                                                       |
| Timor-LesteTL202020           | EPI_ISL_456599 | National Health Laboratory, Timor-Leste                                                                       | Microbiological Diagnostic Unit Public Health Laboratory, The Peter Doherty Institute for Infection and Immunity | 2020-04-13 | Soares da Silva et al                                                                                                                       |
| Timor-LesteTL212020           | EPI_ISL_456607 | National Health Laboratory, Timor-Leste                                                                       | Microbiological Diagnostic Unit Public Health Laboratory, The Peter Doherty Institute for Infection and Immunity | 2020-04-14 | Soares da Silva et al                                                                                                                       |
| Timor-LesteTL222020           | EPI_ISL_456612 | National Health Laboratory, Timor-Leste                                                                       | Microbiological Diagnostic Unit Public Health Laboratory, The Peter Doherty Institute for Infection and Immunity | 2020-04-17 | Soares da Silva et al                                                                                                                       |
| Timor-LesteTL232020           | EPI_ISL_456611 | National Health Laboratory, Timor-Leste                                                                       | Microbiological Diagnostic Unit Public Health Laboratory, The Peter Doherty Institute for Infection and Immunity | 2020-04-18 | Soares da Silva et al                                                                                                                       |
| TunisiaCOV0010-122020         | EPI_ISL_463001 |                                                                                                               | Clinical virology                                                                                                | 2020-03-18 | Fates et al ( <a href="https://dx.doi.org/10.22541/au.159137642.26983355">https://dx.doi.org/10.22541/au.159137642.26983355</a> )           |
| TunisiaCOV04252020            | EPI_ISL_463005 |                                                                                                               | Clinical virology                                                                                                | 2020-03-27 | Fates et al ( <a href="https://dx.doi.org/10.22541/au.159137642.26983355">https://dx.doi.org/10.22541/au.159137642.26983355</a> )           |
| TunisiaCOV08802020            | EPI_ISL_463002 |                                                                                                               | Clinical virology                                                                                                | 2020-03-28 | Fates et al ( <a href="https://dx.doi.org/10.22541/au.159137642.26983355">https://dx.doi.org/10.22541/au.159137642.26983355</a> )           |
| TunisiaCOV13392020            | EPI_ISL_463003 |                                                                                                               | Clinical virology                                                                                                | 2020-03-30 | Fates et al ( <a href="https://dx.doi.org/10.22541/au.159137642.26983355">https://dx.doi.org/10.22541/au.159137642.26983355</a> )           |
| TunisiaMHT_12020              | EPI_ISL_458286 |                                                                                                               | Bundeswehr Institute of Microbiology                                                                             | 2020-03-21 | Handrick et al                                                                                                                              |
| TunisiaMHT_2020               | EPI_ISL_458286 |                                                                                                               | Bundeswehr Institute of Microbiology                                                                             | 2020-03-24 | Handrick et al                                                                                                                              |
| TurkeyERAGEM00102020          | EPI_ISL_424366 | Vaccine Research, Development and Application Center, Eciyes University                                       | Genomic Laboratory (SLAB), Istanbul Technical University                                                         | 2020-03-17 | Shahik Terkes Islam Pawel et al ( <a href="https://dx.doi.org/10.1101/2020.05.15.095794">https://dx.doi.org/10.1101/2020.05.15.095794</a> ) |
| TurkeyGLAB-CoV0082020         | EPI_ISL_427391 | Genomic Laboratory (GLAB) (Congjaint lab of Health Directorate of Istanbul and Istanbul Technical University) | Genomic Laboratory (SLAB), Istanbul Technical University                                                         | 2020-04-13 | Ilker Karacan et al ( <a href="https://dx.doi.org/10.1101/2020.05.15.095794">https://dx.doi.org/10.1101/2020.05.15.095794</a> )             |
| TurkeyGLAB-CoV01202020        | EPI_ISL_428348 | Genomic Laboratory (GLAB) (Congjaint lab of Health Directorate of Istanbul and Istanbul Technical University) | Genomic Laboratory (SLAB), Istanbul Technical University                                                         | 2020-04-17 | Ilker Karacan et al ( <a href="https://dx.doi.org/10.1101/2020.05.15.095794">https://dx.doi.org/10.1101/2020.05.15.095794</a> )             |
| TurkeyGLAB-CoV0132020         | EPI_ISL_428368 | Genomic Laboratory (GLAB) (Congjaint lab of Health Directorate of Istanbul and Istanbul Technical University) | Genomic Laboratory (SLAB), Istanbul Technical University                                                         | 2020-04-16 | Ilker Karacan et al ( <a href="https://dx.doi.org/10.1101/2020.05.15.095794">https://dx.doi.org/10.1101/2020.05.15.095794</a> )             |
| TurkeyHSGM-10042020           | EPI_ISL_437316 | Ministry of Health Turkey                                                                                     | Ministry of Health Turkey                                                                                        | 2020-03-25 | Fatma Bayraktar et al B                                                                                                                     |
| TurkeyHSGM-102412020          | EPI_ISL_429871 | Ministry of Health Turkey                                                                                     | Ministry of Health Turkey                                                                                        | 2020-03-23 | Fatma Bayraktar et al A ( <a href="https://dx.doi.org/10.1101/2020.05.15.095794">https://dx.doi.org/10.1101/2020.05.15.095794</a> )         |
| TurkeyHSGM-10272020           | EPI_ISL_437317 | Ministry of Health Turkey                                                                                     | Ministry of Health Turkey                                                                                        | 2020-03-27 | Fatma Bayraktar et al B                                                                                                                     |
| TurkeyHSGM-10612020           | EPI_ISL_437310 | Ministry of Health Turkey                                                                                     | Ministry of Health Turkey                                                                                        | 2020-03-27 | Fatma Bayraktar et al B                                                                                                                     |
| TurkeyHSGM-116402020          | EPI_ISL_437333 | Ministry of Health Turkey                                                                                     | Ministry of Health Turkey                                                                                        | 2020-03-25 | Fatma Bayraktar et al B                                                                                                                     |
| TurkeyHSGM-120582020          | EPI_ISL_437335 | Ministry of Health Turkey                                                                                     | Ministry of Health Turkey                                                                                        | 2020-03-25 | Fatma Bayraktar et al B                                                                                                                     |
| TurkeyHSGM-14182020           | EPI_ISL_437305 | Ministry of Health Turkey                                                                                     | Ministry of Health Turkey                                                                                        | 2020-03-27 | Fatma Bayraktar et al B                                                                                                                     |
| TurkeyHSGM-14282020           | EPI_ISL_437311 | Ministry of Health Turkey                                                                                     | Ministry of Health Turkey                                                                                        | 2020-03-27 | Fatma Bayraktar et al B                                                                                                                     |
| TurkeyHSGM-14442020           | EPI_ISL_437318 | Ministry of Health Turkey                                                                                     | Ministry of Health Turkey                                                                                        | 2020-03-19 | Fatma Bayraktar et al B                                                                                                                     |
| TurkeyHSGM-14582020           | EPI_ISL_437327 | Ministry of Health Turkey                                                                                     | Ministry of Health Turkey                                                                                        | 2020-03-19 | Fatma Bayraktar et al B                                                                                                                     |
| TurkeyHSGM-14762020           | EPI_ISL_437324 | Ministry of Health Turkey                                                                                     | Ministry of Health Turkey                                                                                        | 2020-03-19 | Fatma Bayraktar et al B                                                                                                                     |
| TurkeyHSGM-14812020           | EPI_ISL_437323 | Ministry of Health Turkey                                                                                     | Ministry of Health Turkey                                                                                        | 2020-03-19 | Fatma Bayraktar et al B                                                                                                                     |
| TurkeyHSGM-14902020           | EPI_ISL_437319 | Ministry of Health Turkey                                                                                     | Ministry of Health Turkey                                                                                        | 2020-03-19 | Fatma Bayraktar et al B                                                                                                                     |
| TurkeyHSGM-3022020            | EPI_ISL_437313 | Ministry of Health Turkey                                                                                     | Ministry of Health Turkey                                                                                        | 2020-03-27 | Fatma Bayraktar et al B                                                                                                                     |
| TurkeyHSGM-4392020            | EPI_ISL_437307 | Ministry of Health Turkey                                                                                     | Ministry of Health Turkey                                                                                        | 2020-03-25 | Fatma Bayraktar et al B                                                                                                                     |
| TurkeyHSGM-45982020           | EPI_ISL_429868 | Ministry of Health Turkey                                                                                     | Ministry of Health Turkey                                                                                        | 2020-03-17 | Fatma Bayraktar et al A ( <a href="https://dx.doi.org/10.1101/2020.05.15.095794">https://dx.doi.org/10.1101/2020.05.15.095794</a> )         |
| TurkeyHSGM-47012020           | EPI_ISL_429869 | Ministry of Health Turkey                                                                                     | Ministry of Health Turkey                                                                                        | 2020-03-17 | Fatma Bayraktar et al A ( <a href="https://dx.doi.org/10.1101/2020.05.15.095794">https://dx.doi.org/10.1101/2020.05.15.095794</a> )         |
| TurkeyHSGM-47062020           | EPI_ISL_428712 | Ministry of Health Turkey                                                                                     | Ministry of Health Turkey                                                                                        | 2020-03-17 | Fatma Bayraktar et al A ( <a href="https://dx.doi.org/10.1101/2020.05.15.095794">https://dx.doi.org/10.1101/2020.05.15.095794</a> )         |
| TurkeyHSGM-51152020           | EPI_ISL_437308 | Ministry of Health Turkey                                                                                     | Ministry of Health Turkey                                                                                        | 2020-03-25 | Fatma Bayraktar et al B                                                                                                                     |
| TurkeyHSGM-55162020           | EPI_ISL_428713 | Ministry of Health Turkey                                                                                     | Ministry of Health Turkey                                                                                        | 2020-03-18 | Fatma Bayraktar et al A ( <a href="https://dx.doi.org/10.1101/2020.05.15.095794">https://dx.doi.org/10.1101/2020.05.15.095794</a> )         |
| TurkeyHSGM-56242020           | EPI_ISL_428715 | Ministry of Health Turkey                                                                                     | Ministry of Health Turkey                                                                                        | 2020-03-18 | Fatma Bayraktar et al A ( <a href="https://dx.doi.org/10.1101/2020.05.15.095794">https://dx.doi.org/10.1101/2020.05.15.095794</a> )         |
| TurkeyHSGM-57692020           | EPI_ISL_428717 | Ministry of Health Turkey                                                                                     | Ministry of Health Turkey                                                                                        | 2020-03-19 | Fatma Bayraktar et al A ( <a href="https://dx.doi.org/10.1101/2020.05.15.095794">https://dx.doi.org/10.1101/2020.05.15.095794</a> )         |
| TurkeyHSGM-57702020           | EPI_ISL_428718 | Ministry of Health Turkey                                                                                     | Ministry of Health Turkey                                                                                        | 2020-03-19 | Fatma Bayraktar et al A ( <a href="https://dx.doi.org/10.1101/2020.05.15.095794">https://dx.doi.org/10.1101/2020.05.15.095794</a> )         |
| TurkeyHSGM-6742020            | EPI_ISL_437304 | Ministry of Health Turkey                                                                                     | Ministry of Health Turkey                                                                                        | 2020-03-26 | Fatma Bayraktar et al B                                                                                                                     |
| TurkeyHSGM-77182020           | EPI_ISL_428719 | Ministry of Health Turkey                                                                                     | Ministry of Health Turkey                                                                                        | 2020-03-21 | Fatma Bayraktar et al A ( <a href="https://dx.doi.org/10.1101/2020.05.15.095794">https://dx.doi.org/10.1101/2020.05.15.095794</a> )         |
| TurkeyHSGM-80102020           | EPI_ISL_428722 | Ministry of Health Turkey                                                                                     | Ministry of Health Turkey                                                                                        | 2020-03-22 | Fatma Bayraktar et al A ( <a href="https://dx.doi.org/10.1101/2020.05.15.095794">https://dx.doi.org/10.1101/2020.05.15.095794</a> )         |
| TurkeyHSGM-89642020           | EPI_ISL_428723 | Ministry of Health Turkey                                                                                     | Ministry of Health Turkey                                                                                        | 2020-03-22 | Fatma Bayraktar et al A ( <a href="https://dx.doi.org/10.1101/2020.05.15.095794">https://dx.doi.org/10.1101/2020.05.15.095794</a> )         |
| TurkeyHSGM-89752020           | EPI_ISL_429863 | Ministry of Health Turkey                                                                                     | Ministry of Health Turkey                                                                                        | 2020-03-22 | Fatma Bayraktar et al A ( <a href="https://dx.doi.org/10.1101/2020.05.15.095794">https://dx.doi.org/10.1101/2020.05.15.095794</a> )         |
| TurkeyIMU-SP-012020           | EPI_ISL_460618 |                                                                                                               | Physiology                                                                                                       | 2020-04-15 | Pence et al                                                                                                                                 |
| TurkeyIMU-SP-022020           | EPI_ISL_460617 |                                                                                                               | Physiology                                                                                                       | 2020-04-16 | Pence et al                                                                                                                                 |
| TurkeyIMU-SP-032020           | EPI_ISL_460606 |                                                                                                               | Physiology, Istanbul Medeniyet University                                                                        | 2020-04-16 | Pence et al                                                                                                                                 |
| TurkeyIMU-SP-042020           | EPI_ISL_460619 |                                                                                                               | Physiology                                                                                                       | 2020-04-16 | Pence et al                                                                                                                                 |
| TurkeyIstanbul-BezmilVali2020 | EPI_ISL_457824 | Bezmilalem Vakfi University, Dept Microbiology, Medical School, Fatih, Istanbul, Turkey                       | Bezmilalem Vakfi University, Medical School & Beykoz Institute of Life Sciences & Biotechnology                  | 2020-03-24 | Mehmet Z. Doymaz et al                                                                                                                      |
| TurkeyVETAL1902_12020         | EPI_ISL_435057 | T.C. Sağlık Bakanlığı Adıyaman İl Sağlık Müdürlüğü Adıyaman Eğitim Ve Araştırma Hastanesi                     | VETAL Animal Health Products Company, BSL3+ Production Laboratory, Turkey                                        | 2020-04-09 | Fatma Nilay Tutak et al                                                                                                                     |
| TurkeyVETAL1902_22020         | EPI_ISL_455719 | T.C. Sağlık Bakanlığı Adıyaman İl Sağlık Müdürlüğü Adıyaman Eğitim Ve Araştırma Hastanesi                     | VETAL Animal Health Products Company, BSL3+ Production Laboratory, Turkey                                        | 2020-04-09 | Mehmet Turgut et al                                                                                                                         |
| UgandaUG0012020               | EPI_ISL_451183 | Uganda Virus Research Institute                                                                               | MRCU/URI & LSHTM Uganda Research Unit                                                                            | 2020-03-25 | Dan Lule Bugembe et al                                                                                                                      |
| UgandaUG0022020               | EPI_ISL_451184 | Uganda Virus Research Institute                                                                               | MRCU/URI & LSHTM Uganda Research Unit                                                                            | 2020-03-26 | Dan Lule Bugembe et al                                                                                                                      |
| UgandaUG0032020               | EPI_ISL_451185 | Uganda Virus Research Institute                                                                               | MRCU/URI & LSHTM Uganda Research Unit                                                                            | 2020-03-27 | Dan Lule Bugembe et al                                                                                                                      |
| UgandaUG0042020               | EPI_ISL_451186 | Uganda Virus Research Institute                                                                               | MRCU/URI & LSHTM Uganda Research Unit                                                                            | 2020-03-27 | Dan Lule Bugembe et al                                                                                                                      |
| UgandaUG0052020               | EPI_ISL_451187 | Uganda Virus Research Institute                                                                               | MRCU/URI & LSHTM Uganda Research Unit                                                                            | 2020-03-27 | Dan Lule Bugembe et al                                                                                                                      |
| UgandaUG0062020               | EPI_ISL_451188 | Uganda Virus Research Institute                                                                               | MRCU/URI & LSHTM Uganda Research Unit                                                                            | 2020-03-30 | Dan Lule Bugembe et al                                                                                                                      |
| UgandaUG0072020               | EPI_ISL_451189 | Uganda Virus Research Institute                                                                               | MRCU/URI & LSHTM Uganda Research Unit                                                                            | 2020-03-30 | Dan Lule Bugembe et al                                                                                                                      |
| UgandaUG0082020               | EPI_ISL_451190 | Uganda Virus Research Institute                                                                               | MRCU/URI & LSHTM Uganda Research Unit                                                                            | 2020-03-30 | Dan Lule Bugembe et al                                                                                                                      |
| UgandaUG0092020               | EPI_ISL_451191 | Uganda Virus Research Institute                                                                               | MRCU/URI & LSHTM Uganda Research Unit                                                                            | 2020-03-30 | Dan Lule Bugembe et al                                                                                                                      |
| UgandaUG0102020               | EPI_ISL_451192 | Uganda Virus Research Institute                                                                               | MRCU/URI & LSHTM Uganda Research Unit                                                                            | 2020-03-30 | Dan Lule Bugembe et al                                                                                                                      |
| UgandaUG0112020               | EPI_ISL_451193 | Uganda Virus Research Institute                                                                               | MRCU/URI & LSHTM Uganda Research Unit                                                                            | 2020-03-30 | Dan Lule Bugembe et al                                                                                                                      |
| UgandaUG0122020               | EPI_ISL_451194 | Uganda Virus Research Institute                                                                               | MRCU/URI & LSHTM Uganda Research Unit                                                                            | 2020-03-22 | Dan Lule Bugembe et al                                                                                                                      |
| UgandaUG0132020               | EPI_ISL_451195 | Uganda Virus Research Institute                                                                               | MRCU/URI & LSHTM Uganda Research Unit                                                                            | 2020-03-22 | Dan Lule Bugembe et al                                                                                                                      |
| UgandaUG0142020               | EPI_ISL_451196 | Uganda Virus Research Institute                                                                               | MRCU/URI & LSHTM Uganda Research Unit                                                                            | 2020-03-25 | Dan Lule Bugembe et al                                                                                                                      |
| UgandaUG0152020               | EPI_ISL_451197 | Uganda Virus Research Institute                                                                               | MRCU/URI & LSHTM Uganda Research Unit                                                                            | 2020-04-27 | Dan Lule Bugembe et al                                                                                                                      |
| UgandaUG0162020               | EPI_ISL_451198 | Uganda Virus Research Institute                                                                               | MRCU/URI & LSHTM Uganda Research Unit                                                                            | 2020-04-27 | Dan Lule Bugembe et al                                                                                                                      |
| UgandaUG0172020               | EPI_ISL_451199 | Uganda Virus Research Institute                                                                               | MRCU/URI & LSHTM Uganda Research Unit                                                                            | 2020-04-20 | Dan Lule Bugembe et al                                                                                                                      |
| UgandaUG0192020               | EPI_ISL_451201 | Uganda Virus Research Institute                                                                               | MRCU/URI & LSHTM Uganda Research Unit                                                                            | 2020-04-30 | Dan Lule Bugembe et al                                                                                                                      |
| UgandaUG0202020               | EPI_ISL_451202 | Uganda Virus Research Institute                                                                               | MRCU/URI & LSHTM Uganda Research Unit                                                                            | 2020-05-01 | Dan Lule Bugembe et al                                                                                                                      |
| UnitedArabEmiratesL012020     | EPI_ISL_435119 | Mohammed Bin Rashid University of Medicine and Health Sciences                                                | Aj Jalia Children's Hospital                                                                                     | 2020-03-12 | Ahmad Abou Tayoun et al B                                                                                                                   |
| UnitedArabEmiratesL01842020   | EPI_ISL_435121 | Mohammed Bin Rashid University of Medicine and Health Sciences                                                | Aj Jalia Genomics Center                                                                                         | 2020-02-25 | Ahmad Abou Tayoun et al A ( <a href="https://dx.doi.org/10.1101/2020.05.06.080606">https://dx.doi.org/10.1101/2020.05.06.080606</a> )       |
| UnitedArabEmiratesL020312020  | EPI_ISL_435122 | Mohammed Bin Rashid University of Medicine and Health Sciences                                                | Aj Jalia Genomics Center                                                                                         | 2020-03-14 | Ahmad Abou Tayoun et al A ( <a href="https://dx.doi.org/10.1101/2020.05.06.080606">https://dx.doi.org/10.1101/2020.05.06.080606</a> )       |
| UnitedArabEmiratesL02872020   | EPI_ISL_469276 | Mohammed Bin Rashid University of Medicine and Health Sciences                                                | Aj Jalia Genomics Center                                                                                         | 2020-03-27 | Ahmad Abou Tayoun et al B                                                                                                                   |
| UnitedArabEmiratesL04842020   | EPI_ISL_435123 | Mohammed Bin Rashid University of Medicine and Health Sciences                                                | Aj Jalia Genomics Center                                                                                         | 2020-03-12 | Ahmad Abou Tayoun et al A ( <a href="https://dx.doi.org/10.1101/2020.05.06.080606">https://dx.doi.org/10.1101/2020.05.06.080606</a> )       |
| UnitedArabEmiratesL0682020    | EPI_ISL_435120 | Mohammed Bin Rashid University of Medicine and Health Sciences                                                | Aj Jalia Genomics Center                                                                                         | 2020-03-14 | Ahmad Abou Tayoun et al A ( <a href="https://dx.doi.org/10.1101/2020.05.06.080606">https://dx.doi.org/10.1101/2020.05.06.080606</a> )       |
| UnitedArabEmiratesL08792020   | EPI_ISL_435124 | Mohammed Bin Rashid University of Medicine and Health Sciences                                                | Aj Jalia Genomics Center                                                                                         | 2020-03-16 | Ahmad Abou Tayoun et al A ( <a href="https://dx.doi.org/10.1101/2020.05.06.080606">https://dx.doi.org/10.1101/2020.05.06.080606</a> )       |
| UnitedArabEmiratesL08812020   | EPI_ISL_435125 | Mohammed Bin Rashid University of Medicine and Health Sciences                                                | Aj Jalia Genomics Center                                                                                         | 2020-03-16 | Ahmad Abou Tayoun et al A ( <a href="https://dx.doi.org/10.1101/2020.05.06.080606">https://dx.doi.org/10.1101/2020.05.06.080606</a> )       |
| UnitedArabEmiratesL09042020   | EPI_ISL_435126 | Mohammed Bin Rashid University of Medicine and Health Sciences                                                | Aj Jalia Genomics Center                                                                                         | 2020-02-25 | Ahmad Abou Tayoun et al A ( <a href="https://dx.doi.org/10.1101/2020.05.06.080606">https://dx.doi.org/10.1101/2020.05.06.080606</a> )       |
| UnitedArabEmiratesL10142020   | EPI_ISL_435127 | Mohammed Bin Rashid University of Medicine and Health Sciences                                                | Aj Jalia Genomics Center                                                                                         | 2020-03-15 | Ahmad Abou Tayoun et al A ( <a href="https://dx.doi.org/10.1101/2020.05.06.080606">https://dx.doi.org/10.1101/2020.05.06.080606</a> )       |
| UnitedArabEmiratesL10762020   | EPI_ISL_435128 | Mohammed Bin Rashid University of Medicine and Health Sciences                                                | Aj Jalia Genomics Center                                                                                         | 2020-03-15 | Ahmad Abou Tayoun et al A ( <a href="https://dx.doi.org/10.1101/2020.05.06.080606">https://dx.doi.org/10.1101/2020.05.06.080606</a> )       |
| UnitedArabEmiratesL11892020   | EPI_ISL_469277 | Mohammed Bin Rashid University of Medicine and Health Sciences                                                | Aj Jalia Genomics Center                                                                                         | 2020-05-04 | Ahmad Abou Tayoun et al B                                                                                                                   |
| UnitedArabEmiratesL17582020   | EPI_ISL_435129 | Mohammed Bin Rashid University of Medicine and Health Sciences                                                | Aj Jalia Genomics Center                                                                                         | 2020-03-10 | Ahmad Abou Tayoun et al A ( <a href="https://dx.doi.org/10.1101/2020.05.06.080606">https://dx.doi.org/10.1101/2020.05.06.080606</a> )       |
| UnitedArabEmiratesL21852020   | EPI_ISL_435130 | Mohammed Bin Rashid University of Medicine and Health Sciences                                                | Aj Jalia Genomics Center                                                                                         | 2020-03-12 | Ahmad Abou Tayoun et al A ( <a href="https://dx.doi.org/10.1101/2020.05.06.080606">https://dx.doi.org/10.1101/2020.05.06.080606</a> )       |
| UnitedArabEmiratesL24092020   | EPI_ISL_435131 | Mohammed Bin Rashid University of Medicine and Health Sciences                                                | Aj Jalia Genomics Center                                                                                         | 2020-02-25 | Ahmad Abou Tayoun et al A ( <a href="https://dx.doi.org/10.1101/2020.05.06.080606">https://dx.doi.org/10.1101/2020.05.06.080606</a> )       |
| UnitedArabEmiratesL37792020   | EPI_ISL_435132 | Mohammed Bin Rashid University of Medicine and Health Sciences                                                | Aj Jalia Genomics Center                                                                                         | 2020-03-15 | Ahmad Abou Tayoun et al A ( <a href="https://dx.doi.org/10.1101/2020.05.06.080606">https://dx.doi.org/10.1101/2020.05.06.080606</a> )       |
| UnitedArabEmiratesL41842020   | EPI_ISL_435133 | Mohammed Bin Rashid University of Medicine and Health Sciences                                                | Aj Jalia Genomics Center                                                                                         | 2020-03-10 | Ahmad Abou Tayoun et al A ( <a href="https://dx.doi.org/10.1101/2020.05.06.080606">https://dx.doi.org/10.1101/2020.05.06.080606</a> )       |
| UnitedArabEmiratesL42802020   | EPI_ISL_435134 | Mohammed Bin Rashid University of Medicine and Health Sciences                                                | Aj Jalia Genomics Center                                                                                         | 2020-02-08 |                                                                                                                                             |

|                              |                |                                                                                                            |                                                                                                                                           |            |                                                                                                                                                                                                                                |
|------------------------------|----------------|------------------------------------------------------------------------------------------------------------|-------------------------------------------------------------------------------------------------------------------------------------------|------------|--------------------------------------------------------------------------------------------------------------------------------------------------------------------------------------------------------------------------------|
| UnitedArabEmirates19766/2020 | EPI_ISL_435142 | Mohammed Bin Rashid University of Medicine and Health Sciences                                             | Al Jalla Genomics Center                                                                                                                  | 2020-03-14 | Ahmad Abou Tayoun et al A ( <a href="https://dx.doi.org/10.1101/2020.05.06.080608">https://dx.doi.org/10.1101/2020.05.06.080608</a> )                                                                                          |
| UnitedArabEmirates19768/2020 | EPI_ISL_435143 | Mohammed Bin Rashid University of Medicine and Health Sciences                                             | Al Jalla Genomics Center                                                                                                                  | 2020-03-18 | Ahmad Abou Tayoun et al A ( <a href="https://dx.doi.org/10.1101/2020.05.09.086223">https://dx.doi.org/10.1101/2020.05.09.086223</a> )                                                                                          |
| Uruguay/Mdeo-1/2020          | EPI_ISL_444493 | Departamento de Laboratorios de Salud Pública (DLS.P, División Epidemiología, Ministerio de Salud Pública) | Facultad de Ciencias (Sección Genética Evolutiva, Sección Virología), Microbial Genomics Laboratory, Institut Pasteur Montevideo, Uruguay | 2020-03-13 | Panzeri et al                                                                                                                                                                                                                  |
| UruguayUY-1/2020             | EPI_ISL_428476 | Microbial Genomics Laboratory, Institut Pasteur Montevideo                                                 | Microbial Genomics Laboratory, Institut Pasteur Montevideo                                                                                | 2020-03-16 | Cecilia Salazar et al ( <a href="https://dx.doi.org/10.1101/2020.05.09.086223">https://dx.doi.org/10.1101/2020.05.09.086223</a> )                                                                                              |
| UruguayUY-10/2020            | EPI_ISL_429257 | Microbial Genomics Laboratory, Institut Pasteur Montevideo                                                 | Microbial Genomics Laboratory, Institut Pasteur Montevideo                                                                                | 2020-03-19 | Cecilia Salazar et al ( <a href="https://dx.doi.org/10.1101/2020.05.09.086223">https://dx.doi.org/10.1101/2020.05.09.086223</a> )                                                                                              |
| UruguayUY-2/2020             | EPI_ISL_428477 | Microbial Genomics Laboratory, Institut Pasteur Montevideo                                                 | Microbial Genomics Laboratory, Institut Pasteur Montevideo                                                                                | 2020-03-16 | Cecilia Salazar et al ( <a href="https://dx.doi.org/10.1101/2020.05.09.086223">https://dx.doi.org/10.1101/2020.05.09.086223</a> )                                                                                              |
| UruguayUY-4/2020             | EPI_ISL_428479 | Microbial Genomics Laboratory, Institut Pasteur Montevideo                                                 | Microbial Genomics Laboratory, Institut Pasteur Montevideo                                                                                | 2020-03-17 | Cecilia Salazar et al ( <a href="https://dx.doi.org/10.1101/2020.05.09.086223">https://dx.doi.org/10.1101/2020.05.09.086223</a> )                                                                                              |
| UruguayUY-6/2020             | EPI_ISL_428480 | Microbial Genomics Laboratory, Institut Pasteur Montevideo                                                 | Microbial Genomics Laboratory, Institut Pasteur Montevideo                                                                                | 2020-03-17 | Cecilia Salazar et al ( <a href="https://dx.doi.org/10.1101/2020.05.09.086223">https://dx.doi.org/10.1101/2020.05.09.086223</a> )                                                                                              |
| UruguayUY-6/2020             | EPI_ISL_428481 | Microbial Genomics Laboratory, Institut Pasteur Montevideo, Uruguay                                        | Microbial Genomics Laboratory, Institut Pasteur Montevideo                                                                                | 2020-03-17 | Cecilia Salazar et al ( <a href="https://dx.doi.org/10.1101/2020.05.09.086223">https://dx.doi.org/10.1101/2020.05.09.086223</a> )                                                                                              |
| UruguayUY-7/2020             | EPI_ISL_428482 | Microbial Genomics Laboratory, Institut Pasteur Montevideo, Uruguay                                        | Microbial Genomics Laboratory, Institut Pasteur Montevideo                                                                                | 2020-03-17 | Cecilia Salazar et al ( <a href="https://dx.doi.org/10.1101/2020.05.09.086223">https://dx.doi.org/10.1101/2020.05.09.086223</a> )                                                                                              |
| UruguayUY-8/2020             | EPI_ISL_428583 | Microbial Genomics Laboratory, Institut Pasteur Montevideo                                                 | Microbial Genomics Laboratory, Institut Pasteur Montevideo                                                                                | 2020-03-17 | Cecilia Salazar et al ( <a href="https://dx.doi.org/10.1101/2020.05.09.086223">https://dx.doi.org/10.1101/2020.05.09.086223</a> )                                                                                              |
| UruguayUY-9/2020             | EPI_ISL_428584 | Microbial Genomics Laboratory, Institut Pasteur Montevideo                                                 | Microbial Genomics Laboratory, Institut Pasteur Montevideo                                                                                | 2020-03-19 | Cecilia Salazar et al ( <a href="https://dx.doi.org/10.1101/2020.05.09.086223">https://dx.doi.org/10.1101/2020.05.09.086223</a> )                                                                                              |
| UruguayUY-9/2020             | EPI_ISL_428584 | Microbial Genomics Laboratory, Institut Pasteur Montevideo, Uruguay                                        | Microbial Genomics Laboratory, Institut Pasteur Montevideo                                                                                | 2020-03-17 | Cecilia Salazar et al ( <a href="https://dx.doi.org/10.1101/2020.05.09.086223">https://dx.doi.org/10.1101/2020.05.09.086223</a> )                                                                                              |
| UruguayUY-9/2020             | EPI_ISL_428584 | Microbial Genomics Laboratory, Institut Pasteur Montevideo                                                 | Microbial Genomics Laboratory, Institut Pasteur Montevideo                                                                                | 2020-03-17 | Cecilia Salazar et al ( <a href="https://dx.doi.org/10.1101/2020.05.09.086223">https://dx.doi.org/10.1101/2020.05.09.086223</a> )                                                                                              |
| UruguayUY-NYUMC844/2020      | EPI_ISL_457940 | Laboratorio de Biología Molecular Asociación Española Primera en Salud                                     | Departments of Pathology and Medicine, New York University School of Medicine                                                             | 2020-03-17 | Maria Victoria Elzondo et al                                                                                                                                                                                                   |
| UruguayUY-NYUMC845/2020      | EPI_ISL_457941 | Laboratorio de Biología Molecular Asociación Española Primera en Salud                                     | Departments of Pathology and Medicine, New York University School of Medicine                                                             | 2020-03-17 | Maria Victoria Elzondo et al                                                                                                                                                                                                   |
| UruguayUY-NYUMC846/2020      | EPI_ISL_457942 | Laboratorio de Biología Molecular Asociación Española Primera en Salud                                     | Departments of Pathology and Medicine, New York University School of Medicine                                                             | 2020-03-17 | Maria Victoria Elzondo et al                                                                                                                                                                                                   |
| UruguayUY-NYUMC847/2020      | EPI_ISL_457943 | Laboratorio de Biología Molecular Asociación Española Primera en Salud                                     | Departments of Pathology and Medicine, New York University School of Medicine                                                             | 2020-03-17 | Maria Victoria Elzondo et al                                                                                                                                                                                                   |
| UruguayUY-NYUMC848/2020      | EPI_ISL_457944 | Laboratorio de Biología Molecular Asociación Española Primera en Salud                                     | Departments of Pathology and Medicine, New York University School of Medicine                                                             | 2020-03-17 | Maria Victoria Elzondo et al                                                                                                                                                                                                   |
| UruguayUY-NYUMC850/2020      | EPI_ISL_457946 | Laboratorio de Biología Molecular Asociación Española Primera en Salud                                     | Departments of Pathology and Medicine, New York University School of Medicine                                                             | 2020-03-17 | Maria Victoria Elzondo et al                                                                                                                                                                                                   |
| UruguayUY-NYUMC852/2020      | EPI_ISL_457948 | Laboratorio de Biología Molecular Asociación Española Primera en Salud                                     | Departments of Pathology and Medicine, New York University School of Medicine                                                             | 2020-03-17 | Maria Victoria Elzondo et al                                                                                                                                                                                                   |
| UruguayUY-NYUMC855/2020      | EPI_ISL_457951 | Laboratorio de Biología Molecular Asociación Española Primera en Salud                                     | Departments of Pathology and Medicine, New York University School of Medicine                                                             | 2020-03-21 | Maria Victoria Elzondo et al                                                                                                                                                                                                   |
| UruguayUY-NYUMC856/2020      | EPI_ISL_457952 | Laboratorio de Biología Molecular Asociación Española Primera en Salud                                     | Departments of Pathology and Medicine, New York University School of Medicine                                                             | 2020-03-21 | Maria Victoria Elzondo et al                                                                                                                                                                                                   |
| UruguayUY-NYUMC857/2020      | EPI_ISL_457953 | Laboratorio de Biología Molecular Asociación Española Primera en Salud                                     | Departments of Pathology and Medicine, New York University School of Medicine                                                             | 2020-03-23 | Maria Victoria Elzondo et al                                                                                                                                                                                                   |
| UruguayUY-NYUMC858/2020      | EPI_ISL_457954 | Laboratorio de Biología Molecular Asociación Española Primera en Salud                                     | Departments of Pathology and Medicine, New York University School of Medicine                                                             | 2020-03-23 | Maria Victoria Elzondo et al                                                                                                                                                                                                   |
| UruguayUY-NYUMC860/2020      | EPI_ISL_457956 | Laboratorio de Biología Molecular Asociación Española Primera en Salud                                     | Departments of Pathology and Medicine, New York University School of Medicine                                                             | 2020-03-25 | Maria Victoria Elzondo et al                                                                                                                                                                                                   |
| UruguayUY-NYUMC861/2020      | EPI_ISL_457957 | Laboratorio de Biología Molecular Asociación Española Primera en Salud                                     | Departments of Pathology and Medicine, New York University School of Medicine                                                             | 2020-03-25 | Maria Victoria Elzondo et al                                                                                                                                                                                                   |
| UruguayUY-NYUMC862/2020      | EPI_ISL_457958 | Laboratorio de Biología Molecular Asociación Española Primera en Salud                                     | Departments of Pathology and Medicine, New York University School of Medicine                                                             | 2020-03-25 | Maria Victoria Elzondo et al                                                                                                                                                                                                   |
| UruguayUY-NYUMC864/2020      | EPI_ISL_457960 | Laboratorio de Biología Molecular Asociación Española Primera en Salud                                     | Departments of Pathology and Medicine, New York University School of Medicine                                                             | 2020-03-28 | Maria Victoria Elzondo et al                                                                                                                                                                                                   |
| UruguayUY-NYUMC866/2020      | EPI_ISL_457962 | Laboratorio de Biología Molecular Asociación Española Primera en Salud                                     | Departments of Pathology and Medicine, New York University School of Medicine                                                             | 2020-03-30 | Maria Victoria Elzondo et al                                                                                                                                                                                                   |
| UruguayUY-NYUMC867/2020      | EPI_ISL_457963 | Laboratorio de Biología Molecular Asociación Española Primera en Salud                                     | Departments of Pathology and Medicine, New York University School of Medicine                                                             | 2020-03-28 | Maria Victoria Elzondo et al                                                                                                                                                                                                   |
| UruguayUY-NYUMC868/2020      | EPI_ISL_457964 | Laboratorio de Biología Molecular Asociación Española Primera en Salud                                     | Departments of Pathology and Medicine, New York University School of Medicine                                                             | 2020-04-01 | Maria Victoria Elzondo et al                                                                                                                                                                                                   |
| UruguayUY-NYUMC869/2020      | EPI_ISL_457965 | Laboratorio de Biología Molecular Asociación Española Primera en Salud                                     | Departments of Pathology and Medicine, New York University School of Medicine                                                             | 2020-04-03 | Maria Victoria Elzondo et al                                                                                                                                                                                                   |
| UruguayUY-NYUMC871/2020      | EPI_ISL_457967 | Laboratorio de Biología Molecular Asociación Española Primera en Salud                                     | Departments of Pathology and Medicine, New York University School of Medicine                                                             | 2020-04-09 | Maria Victoria Elzondo et al                                                                                                                                                                                                   |
| UruguayUY-NYUMC872/2020      | EPI_ISL_457968 | Laboratorio de Biología Molecular Asociación Española Primera en Salud                                     | Departments of Pathology and Medicine, New York University School of Medicine                                                             | 2020-04-11 | Maria Victoria Elzondo et al                                                                                                                                                                                                   |
| UruguayUY-NYUMC873/2020      | EPI_ISL_457969 | Laboratorio de Biología Molecular Asociación Española Primera en Salud                                     | Departments of Pathology and Medicine, New York University School of Medicine                                                             | 2020-04-14 | Maria Victoria Elzondo et al                                                                                                                                                                                                   |
| UruguayUY-NYUMC874/2020      | EPI_ISL_457970 | Laboratorio de Biología Molecular Asociación Española Primera en Salud                                     | Departments of Pathology and Medicine, New York University School of Medicine                                                             | 2020-04-14 | Maria Victoria Elzondo et al                                                                                                                                                                                                   |
| UruguayUY-NYUMC875/2020      | EPI_ISL_457971 | Laboratorio de Biología Molecular Asociación Española Primera en Salud                                     | Departments of Pathology and Medicine, New York University School of Medicine                                                             | 2020-04-19 | Maria Victoria Elzondo et al                                                                                                                                                                                                   |
| UruguayUY-NYUMC876/2020      | EPI_ISL_457972 | Laboratorio de Biología Molecular Asociación Española Primera en Salud                                     | Departments of Pathology and Medicine, New York University School of Medicine                                                             | 2020-04-21 | Maria Victoria Elzondo et al                                                                                                                                                                                                   |
| UruguayUY-NYUMC877/2020      | EPI_ISL_457973 | Laboratorio de Biología Molecular Asociación Española Primera en Salud                                     | Departments of Pathology and Medicine, New York University School of Medicine                                                             | 2020-04-22 | Maria Victoria Elzondo et al                                                                                                                                                                                                   |
| USACA_2602/2020              | EPI_ISL_419554 | California Department of Public Health                                                                     | Pathogen Discovery, Respiratory Viruses Branch, Division of Viral Diseases, Centers for Disease Control and Prevention                    | 2020-02-26 | Ying Tao et al B                                                                                                                                                                                                               |
| USACA-CDPH-UC1/2020          | EPI_ISL_413557 | California Department of Public Health                                                                     | Chiu Laboratory, University of California, San Francisco                                                                                  | 2020-02-26 | Xiangding Deng et al A ( <a href="https://dx.doi.org/10.1126/science.abb0263">https://dx.doi.org/10.1126/science.abb0263</a> )                                                                                                 |
| USACA-CDPH-UC3/2020          | EPI_ISL_413559 | California Department of Public Health                                                                     | Chiu Laboratory, University of California, San Francisco                                                                                  | 2020-02-27 | Xiangding Deng et al A ( <a href="https://dx.doi.org/10.1126/science.abb0263">https://dx.doi.org/10.1126/science.abb0263</a> )                                                                                                 |
| USACA-CZB-1095/2020          | EPI_ISL_444053 | UCSF Clinical Microbiology Laboratory                                                                      | Chan-Zuckerberg Biohub                                                                                                                    | 2020-04-27 | CZB Cistahub Consortium et al                                                                                                                                                                                                  |
| USACA-CZB-1140/2020          | EPI_ISL_447891 | University of California, Davis                                                                            | Chan-Zuckerberg Biohub                                                                                                                    | 2020-04-01 | CZB Cistahub Consortium et al                                                                                                                                                                                                  |
| USACA-CZB-1219/2020          | EPI_ISL_450468 | Stanford clinical virology lab                                                                             | Chan-Zuckerberg Biohub                                                                                                                    | 2020-03-20 | Benjamin Pinkey et al                                                                                                                                                                                                          |
| USACA-CZB-1400/2020          | EPI_ISL_468380 | Alameda County Public Health Lab                                                                           | Chan-Zuckerberg Biohub                                                                                                                    | 2020-04-19 | CZB Cistahub Consortium et al                                                                                                                                                                                                  |
| USACA-CZB-1484/2020          | EPI_ISL_468435 | County of San Luis Obispo Public Health Laboratory                                                         | Chan-Zuckerberg Biohub                                                                                                                    | 2020-05-01 | CZB Cistahub Consortium et al                                                                                                                                                                                                  |
| USACA-CZB-1622/2020          | EPI_ISL_468551 | San Joaquin County Public Health Lab                                                                       | Chan-Zuckerberg Biohub                                                                                                                    | 2020-05-07 | CZB Cistahub Consortium et al                                                                                                                                                                                                  |
| USACA-SCCPHD-UC104/2020      | EPI_ISL_435583 | Santa Clara County Public Health Department                                                                | Chiu Laboratory, University of California, San Francisco                                                                                  | 2020-02-29 | Xiangding Deng et al B                                                                                                                                                                                                         |
| USACA-SCCPHD-UC106/2020      | EPI_ISL_435585 | Santa Clara County Public Health Department                                                                | Chiu Laboratory, University of California, San Francisco                                                                                  | 2020-02-29 | Xiangding Deng et al B                                                                                                                                                                                                         |
| USACA-SR0106/2020            | EPI_ISL_440302 | UC San Diego Center for Advanced Laboratory Medicine                                                       | Andersen lab at Scripps Research                                                                                                          | 2020-03-14 | SEARCH Alliance San Diego with David Práde et al                                                                                                                                                                               |
| USACA2/2020                  | EPI_ISL_406036 | California Department of Public Health                                                                     | Pathogen Discovery, Respiratory Viruses Branch, Division of Viral Diseases, Centers for Disease Control and Prevention                    | 2020-01-22 | Anna Uehara et al ( <a href="https://dx.doi.org/10.1101/2020.03.09.20032896">https://dx.doi.org/10.1101/2020.03.09.20032896</a> )                                                                                              |
| USACA5/2020                  | EPI_ISL_408010 | California Department of Health                                                                            | Pathogen Discovery, Respiratory Viruses Branch, Division of Viral Diseases, Centers for Disease Control and Prevention                    | 2020-01-29 | Ying Tao et al A ( <a href="https://dx.doi.org/10.1101/2020.03.09.20032896">https://dx.doi.org/10.1101/2020.03.09.20032896</a> )                                                                                               |
| USACA6/2020                  | EPI_ISL_410044 | California Department of Public Health                                                                     | Pathogen Discovery, Respiratory Viruses Branch, Division of Viral Diseases, Centers for Disease Control and Prevention                    | 2020-01-27 | Jing Zhang et al ( <a href="https://dx.doi.org/10.1101/2020.03.09.20032896">https://dx.doi.org/10.1101/2020.03.09.20032896</a> )                                                                                               |
| USACT-Yale-034/2020          | EPI_ISL_419524 | Yale Clinical Virology Laboratory                                                                          | Gruhaugh Lab - Yale School of Public Health                                                                                               | 2020-03-15 | Joseph Fauver et al                                                                                                                                                                                                            |
| USACT-Yale-076/2020          | EPI_ISL_429384 | Yale COVID-19 Biorepository                                                                                | Gruhaugh Lab - Yale School of Public Health                                                                                               | 2020-04-04 | Joseph Fauver et al                                                                                                                                                                                                            |
| USAF-6PRH-0003/2020          | EPI_ISL_450506 | Florida Bureau of Public Health Laboratories                                                               | Florida Bureau of Public Health Laboratories                                                                                              | 2020-04-16 | Sarah Schmedes et al                                                                                                                                                                                                           |
| USALW-LW-360/2020            | EPI_ISL_450714 | University of Wisconsin-Madison AIDS Vaccine Research Laboratories                                         | University of Wisconsin-Madison AIDS Vaccine Research Laboratories                                                                        | 2020-04-18 | Gage Moreno et al                                                                                                                                                                                                              |
| USAL/IL/2020                 | EPI_ISL_404253 | IL Department of Public Health Chicago Laboratory                                                          | Pathogen Discovery, Respiratory Viruses Branch, Division of Viral Diseases, Centers for Disease Control and Prevention                    | 2020-01-21 | Ying Tao et al A ( <a href="https://dx.doi.org/10.1101/2020.03.09.20032896">https://dx.doi.org/10.1101/2020.03.09.20032896</a> )                                                                                               |
| USALA-EVTL095/2020           | EPI_ISL_451256 | LSUHS Emerging Viral Threat Laboratory                                                                     | Microbial Genome Sequencing Center                                                                                                        | 2020-05-06 | Jeremy P. Kamil et al                                                                                                                                                                                                          |
| USALA-SR0292/2020            | EPI_ISL_445147 | Robert Garry lab                                                                                           | Andersen lab at Scripps Research                                                                                                          | 2020-04-07 | Allison Smither et al                                                                                                                                                                                                          |
| USALA-SR0299/2020            | EPI_ISL_445154 | Robert Garry lab                                                                                           | Andersen lab at Scripps Research                                                                                                          | 2020-04-07 | Allison Smither et al                                                                                                                                                                                                          |
| USAMA_1355/2020              | EPI_ISL_424913 | MA State Public Health Laboratory                                                                          | Pathogen Discovery, Respiratory Viruses Branch, Division of Viral Diseases, Centers for Disease Control and Prevention                    | 2020-03-05 | Ying Tao et al B                                                                                                                                                                                                               |
| USAMA_3620/2020              | EPI_ISL_424918 | MA State Public Health Laboratory                                                                          | Pathogen Discovery, Respiratory Viruses Branch, Division of Viral Diseases, Centers for Disease Control and Prevention                    | 2020-03-06 | Ying Tao et al B                                                                                                                                                                                                               |
| USAMA-MGH-00264/2020         | EPI_ISL_406160 | Massachusetts General Hospital                                                                             | Infectious Disease Program, Broad Institute of Harvard and MIT                                                                            | 2020-04-01 | Lernieux et al ( <a href="https://virological.org/t/introduction-and-spread-of-sars-cov-2-in-the-greater-boston-area/503">https://virological.org/t/introduction-and-spread-of-sars-cov-2-in-the-greater-boston-area/503</a> ) |
| USAMA-MGH-00446/2020         | EPI_ISL_406352 | Massachusetts General Hospital                                                                             | Infectious Disease Program, Broad Institute of Harvard and MIT                                                                            | 2020-04-01 | Lernieux et al ( <a href="https://virological.org/t/introduction-and-spread-of-sars-cov-2-in-the-greater-boston-area/503">https://virological.org/t/introduction-and-spread-of-sars-cov-2-in-the-greater-boston-area/503</a> ) |
| USAMA-MGH-00664/2020         | EPI_ISL_406307 | Massachusetts General Hospital                                                                             | Infectious Disease Program, Broad Institute of Harvard and MIT                                                                            | 2020-04-04 | Lernieux et al ( <a href="https://virological.org/t/introduction-and-spread-of-sars-cov-2-in-the-greater-boston-area/503">https://virological.org/t/introduction-and-spread-of-sars-cov-2-in-the-greater-boston-area/503</a> ) |
| USAM-MDHHS-SC20289/2020      | EPI_ISL_452263 | Michigan Department of Health and Human Services, Bureau of Laboratories                                   | Michigan Department of Health and Human Services, Bureau of Laboratories                                                                  | 2020-05-01 | Blankenship HM et al                                                                                                                                                                                                           |
| USAM-MDHHS-SC20348/2020      | EPI_ISL_450627 | Michigan Department of Health and Human Services, Bureau of Laboratories                                   | Michigan Department of Health and Human Services, Bureau of Laboratories                                                                  | 2020-03-29 | Blankenship HM et al                                                                                                                                                                                                           |
| USAM-MDHHS-SC20384/2020      | EPI_ISL_450575 | Michigan Department of Health and Human Services, Bureau of Laboratories                                   | Michigan Department of Health and Human Services, Bureau of Laboratories                                                                  | 2020-03-14 | Blankenship HM et al                                                                                                                                                                                                           |
| USAM-MDHHS-SC20400/2020      | EPI_ISL_452274 | Michigan Department of Health and Human Services, Bureau of Laboratories                                   | Michigan Department of Health and Human Services, Bureau of Laboratories                                                                  | 2020-03-24 | Blankenship HM et al                                                                                                                                                                                                           |
| USAM-MDHHS-SC20368/2020      | EPI_ISL_452720 | Michigan Department of Health and Human Services, Bureau of Laboratories                                   | Michigan Department of Health and Human Services, Bureau of Laboratories                                                                  | 2020-04-26 | Blankenship HM et al                                                                                                                                                                                                           |
| USAM-QDX-70/2020             | EPI_ISL_457872 | Quest Diagnostics                                                                                          | Quest Diagnostics                                                                                                                         | 2020-03-15 | Anderson et al                                                                                                                                                                                                                 |
| USAMN-MDH-1007/2020          | EPI_ISL_452682 | Minnesota Department of Health, Public Health Laboratory                                                   | Minnesota Department of Health, Public Health Laboratory                                                                                  | 2020-04-30 | Mati Plumb et al                                                                                                                                                                                                               |
| USAMN-MDH-1028/2020          | EPI_ISL_452873 | Minnesota Department of Health, Public Health Laboratory                                                   | Minnesota Department of Health, Public Health Laboratory                                                                                  | 2020-05-07 | Mati Plumb et al                                                                                                                                                                                                               |
| USAMN-MDH-1040/2020          | EPI_ISL_452885 | Minnesota Department of Health, Public Health Laboratory                                                   | Minnesota Department of Health, Public Health Laboratory                                                                                  | 2020-05-07 | Mati Plumb et al                                                                                                                                                                                                               |
| USAMN-MDH-1042/2020          | EPI_ISL_452887 | Minnesota Department of Health, Public Health Laboratory                                                   | Minnesota Department of Health, Public Health Laboratory                                                                                  | 2020-05-07 | Mati Plumb et al                                                                                                                                                                                                               |
| USAMN-MDH-1070/2020          | EPI_ISL_470750 | Minnesota Department of Health, Public Health Laboratory                                                   | Minnesota Department of Health, Public Health Laboratory                                                                                  | 2020-06-03 | Mati Plumb et al                                                                                                                                                                                                               |
| USAMN-MDH-1071/2020          | EPI_ISL_470751 | Minnesota Department of Health, Public Health Laboratory                                                   | Minnesota Department of Health, Public Health Laboratory                                                                                  | 2020-06-03 | Mati Plumb et al                                                                                                                                                                                                               |
| USAMN-MDH-1073/2020          | EPI_ISL_470753 | Minnesota Department of Health, Public Health Laboratory                                                   | Minnesota Department of Health, Public Health Laboratory                                                                                  | 2020-06-03 | Mati Plumb et al                                                                                                                                                                                                               |
| USAMN-MDH-1074/2020          | EPI_ISL_470754 | Minnesota Department of Health, Public Health Laboratory                                                   | Minnesota Department of Health, Public Health Laboratory                                                                                  | 2020-06-03 | Mati Plumb et al                                                                                                                                                                                                               |
| USAMN-MDH-1075/2020          | EPI_ISL_470755 | Minnesota Department of Health, Public Health Laboratory                                                   | Minnesota Department of Health, Public Health Laboratory                                                                                  | 2020-06-03 | Mati Plumb et al                                                                                                                                                                                                               |
| USAMN-MDH-1076/2020          | EPI_ISL_470756 | Minnesota Department of Health, Public Health Laboratory                                                   | Minnesota Department of Health, Public Health Laboratory                                                                                  | 2020-06-03 | Mati Plumb et al                                                                                                                                                                                                               |
| USAMN-MDH-1078/2020          | EPI_ISL_470758 | Minnesota Department of Health, Public Health Laboratory                                                   | Minnesota Department of Health, Public Health Laboratory                                                                                  | 2020-06-03 | Mati Plumb et al                                                                                                                                                                                                               |
| USAMN-MDH-1079/2020          | EPI_ISL_470759 | Minnesota Department of Health, Public Health Laboratory                                                   | Minnesota Department of Health, Public Health Laboratory                                                                                  | 2020-06-03 | Mati Plumb et al                                                                                                                                                                                                               |
| USAMN-MDH-1082/2020          | EPI_ISL_470762 | Minnesota Department of Health, Public Health Laboratory                                                   | Minnesota Department of Health, Public Health Laboratory                                                                                  | 2020-06-03 | Mati Plumb et al                                                                                                                                                                                                               |
| USAMN-MDH-1084/2020          | EPI_ISL_470764 | Minnesota Department of Health, Public Health Laboratory                                                   | Minnesota Department of Health, Public Health Laboratory                                                                                  | 2020-06-03 | Mati Plumb et al                                                                                                                                                                                                               |
| USAMN-MDH-1085/2020          | EPI_ISL_470765 | Minnesota Department of Health, Public Health Laboratory                                                   | Minnesota Department of Health, Public Health Laboratory                                                                                  | 2020-06-03 | Mati Plumb et al                                                                                                                                                                                                               |
| USAMN-MDH-1088/2020          | EPI_ISL_470768 | Minnesota Department of Health, Public Health Laboratory                                                   | Minnesota Department of Health, Public Health Laboratory                                                                                  | 2020-06-03 | Mati Plumb et al                                                                                                                                                                                                               |
| USAMN-MDH-1089/2020          | EPI_ISL_470769 | Minnesota Department of Health, Public Health Laboratory                                                   | Minnesota Department of Health, Public Health Laboratory                                                                                  | 2020-06-03 | Mati Plumb et al                                                                                                                                                                                                               |
| USAMN-MDH-1090/2020          | EPI_ISL_470770 | Minnesota Department of Health, Public Health Laboratory                                                   | Minnesota Department of Health, Public Health Laboratory                                                                                  | 2020-06-03 | Mati Plumb et al                                                                                                                                                                                                               |
| USAMN-MDH-1091/2020          | EPI_ISL_470771 | Minnesota Department of Health, Public Health Laboratory                                                   | Minnesota Department of Health, Public Health Laboratory                                                                                  | 2020-06-03 | Mati Plumb et al                                                                                                                                                                                                               |
| USAMN-MDH-1092/2020          | EPI_ISL_470772 | Minnesota Department of Health, Public Health Laboratory                                                   | Minnesota Department of Health, Public Health Laboratory                                                                                  | 2020-06-03 | Mati Plumb et al                                                                                                                                                                                                               |
| USAMN-MDH-1093/2020          | EPI_ISL_470773 | Minnesota Department of Health, Public Health Laboratory                                                   | Minnesota Department of Health, Public Health Laboratory                                                                                  | 2020-06-03 | Mati Plumb et al                                                                                                                                                                                                               |
| USAMN-MDH-1094/2020          | EPI_ISL_470774 | Minnesota Department of Health, Public Health Laboratory                                                   | Minnesota Department of Health, Public Health Laboratory                                                                                  | 2020-06-03 | Mati Plumb et al                                                                                                                                                                                                               |
| USAMN-MDH-1095/2020          | EPI_ISL_470775 | Minnesota Department of Health, Public Health Laboratory                                                   | Minnesota Department of Health, Public Health Laboratory                                                                                  | 2020-06-03 | Mati Plumb et al                                                                                                                                                                                                               |
| USAMN-MDH-1098/2020          | EPI_ISL_470778 | Minnesota Department of Health, Public Health Laboratory                                                   | Minnesota Department of Health, Public Health Laboratory                                                                                  | 2020-06-03 | Mati Plumb et al                                                                                                                                                                                                               |
| USAMN-MDH-1099/2020          | EPI_ISL_470779 | Minnesota Department of Health, Public Health Laboratory                                                   | Minnesota Department of Health, Public Health Laboratory                                                                                  | 2020-06-03 | Mati Plumb et al                                                                                                                                                                                                               |
| USAMN-MDH-1100/2020          | EPI_ISL_470780 | Minnesota Department of Health, Public Health Laboratory                                                   | Minnesota Department of Health, Public Health Laboratory                                                                                  | 2020-06-03 | Mati Plumb et al                                                                                                                                                                                                               |
| USAMN-MDH-1102/2020          | EPI_ISL_470782 | Minnesota Department of Health, Public Health Laboratory                                                   | Minnesota Department of Health, Public Health Laboratory                                                                                  | 2020-06-03 | Mati Plumb et al                                                                                                                                                                                                               |
| USAMN-MDH-1103/2020          | EPI_ISL_470783 | Minnesota Department of Health, Public Health Laboratory                                                   | Minnesota Department of Health, Public Health Laboratory                                                                                  | 2020-06-03 | Mati Plumb et al                                                                                                                                                                                                               |
| USAMN-MDH-1104/2020          | EPI_ISL_470784 | Minnesota Department of Health, Public Health Laboratory                                                   | Minnesota Department of Health, Public Health Laboratory                                                                                  | 2020-06-03 | Mati Plumb et al                                                                                                                                                                                                               |
| USAMN-MDH-1105/2020          | EPI_ISL_470785 | Minnesota Department of Health, Public Health Laboratory                                                   | Minnesota Department of Health, Public Health Laboratory                                                                                  | 2020-06-03 | Mati Plumb et al                                                                                                                                                                                                               |
| USAMN-MDH-1107/2020          | EPI_ISL_470787 | Minnesota Department of Health, Public Health Laboratory                                                   | Minnesota Department of Health, Public Health Laboratory                                                                                  |            |                                                                                                                                                                                                                                |

|                         |                |                                                                                  |                                                                                                                        |            |                                                                                                                                                                          |
|-------------------------|----------------|----------------------------------------------------------------------------------|------------------------------------------------------------------------------------------------------------------------|------------|--------------------------------------------------------------------------------------------------------------------------------------------------------------------------|
| USANE-10971/2020        | EPI_ISL_466659 | Nebraska Public Health Laboratory                                                | UNMC COVID-19 Response Team                                                                                            | 2020-05-04 | UNMC COVID-19 Response Team et al                                                                                                                                        |
| USANE-11120/2020        | EPI_ISL_466672 | Nebraska Public Health Laboratory                                                | UNMC COVID-19 Response Team                                                                                            | 2020-05-04 | UNMC COVID-19 Response Team et al                                                                                                                                        |
| USANJ-GDX74/2020        | EPI_ISL_467883 | Quest Diagnostics                                                                | Quest Diagnostics                                                                                                      | 2020-03-14 | Anderson et al                                                                                                                                                           |
| USANM-UNM-00148/2020    | EPI_ISL_467569 | New Mexico Department of Health Scientific Laboratory Division                   | Center for Global Health, University of New Mexico Health Sciences Center                                              | 2020-04-03 | Daryl Domman et al                                                                                                                                                       |
| USANY-NYUMC151/2020     | EPI_ISL_424958 | NYU Langone Health                                                               | Departments of Pathology and Medicine, New York University School of Medicine                                          | 2020-04-01 | Maria Aguiro-Rosenfeld et al A<br>( <a href="https://doi.org/10.1101/2020.04.15.20064931">https://doi.org/10.1101/2020.04.15.20064931</a> )                              |
| USANY-NYUMC192/2020     | EPI_ISL_427487 | NYU Langone Health                                                               | Departments of Pathology and Medicine, New York University School of Medicine                                          | 2020-04-01 | Maria Aguiro-Rosenfeld et al A<br>( <a href="https://doi.org/10.1101/2020.04.15.20064931">https://doi.org/10.1101/2020.04.15.20064931</a> )                              |
| USANY-NYUMC463/2020     | EPI_ISL_435722 | NYU Langone Health                                                               | Departments of Pathology and Medicine, New York University School of Medicine                                          | 2020-04-16 | Maria Aguiro-Rosenfeld et al B                                                                                                                                           |
| USANY-NYUMC598/2020     | EPI_ISL_444715 | NYU Langone Health                                                               | Departments of Pathology and Medicine, New York University School of Medicine                                          | 2020-04-03 | Maria Aguiro-Rosenfeld et al B                                                                                                                                           |
| USANY-NYUMC641/2020     | EPI_ISL_444758 | NYU Langone Health                                                               | Departments of Pathology and Medicine, New York University School of Medicine                                          | 2020-04-03 | Maria Aguiro-Rosenfeld et al B                                                                                                                                           |
| USANY-WCMP10H01P/2020   | EPI_ISL_427580 | NewYork-Presbyterian & Mason Lab                                                 | Mason Lab                                                                                                              | 2020-03-15 | Daniel J. Butler et al ( <a href="https://doi.org/10.1101/2020.04.20.0448068">https://doi.org/10.1101/2020.04.20.0448068</a> )                                           |
| USANY-WCMP12C09P/2020   | EPI_ISL_427602 | NewYork-Presbyterian & Mason Lab                                                 | Microbial Genome Sequencing Center, Microbial Genomic Epidemiological Laboratory                                       | 2020-03-16 | Daniel J. Butler et al ( <a href="https://doi.org/10.1101/2020.04.20.0448068">https://doi.org/10.1101/2020.04.20.0448068</a> )                                           |
| USAPA-MGSC36-05/2020    | EPI_ISL_436484 | UPMC Clinical Laboratory                                                         | Microbial Genome Sequencing Center, Microbial Genomic Epidemiological Laboratory                                       | 2020-03-27 | Dan Snyder et al                                                                                                                                                         |
| USAPA-MGSC40-05/2020    | EPI_ISL_436488 | UPMC Clinical Laboratory                                                         | Microbial Genome Sequencing Center, Microbial Genomic Epidemiological Laboratory                                       | 2020-03-28 | Dan Snyder et al                                                                                                                                                         |
| USARI_0520/2020         | EPI_ISL_419553 | RI State Health Laboratories                                                     | Pathogen Discovery, Respiratory Viruses Branch, Division of Viral Diseases, Centers for Disease Control and Prevention | 2020-02-28 | Ying Tao et al B                                                                                                                                                         |
| USATX_2039/2020         | EPI_ISL_420796 | Texas DSHS Lab Services                                                          | Pathogen Discovery, Respiratory Viruses Branch, Division of Viral Diseases, Centers for Disease Control and Prevention | 2020-02-29 | Krista Queen et al A                                                                                                                                                     |
| USATX-HMH0146/2020      | EPI_ISL_434845 | Houston Methodist Hospital                                                       | Houston Methodist Hospital                                                                                             | 2020-03-16 | S. Wesley Long et al ( <a href="https://doi.org/10.1101/2020.05.01.072652">https://doi.org/10.1101/2020.05.01.072652</a> )                                               |
| USATX-HMH050/2020       | EPI_ISL_434759 | Houston Methodist Hospital                                                       | Houston Methodist Hospital                                                                                             | 2020-03-17 | S. Wesley Long et al ( <a href="https://doi.org/10.1101/2020.05.01.072652">https://doi.org/10.1101/2020.05.01.072652</a> )                                               |
| USATX-HMH059/2020       | EPI_ISL_434768 | Houston Methodist Hospital                                                       | Houston Methodist Hospital                                                                                             | 2020-03-17 | S. Wesley Long et al ( <a href="https://doi.org/10.1101/2020.05.01.072652">https://doi.org/10.1101/2020.05.01.072652</a> )                                               |
| USAUT-014/2020          | EPI_ISL_417964 | Utah Public Health Laboratory                                                    | Utah Public Health Laboratory                                                                                          | 2020-03-13 | Erin Young et al                                                                                                                                                         |
| USAUT-03876/2020        | EPI_ISL_450562 | Utah Public Health Laboratory                                                    | Utah Public Health Laboratory                                                                                          | 2020-04-13 | Erin Young et al                                                                                                                                                         |
| USAVA-DCLS-0221/2020    | EPI_ISL_452799 | Virginia DCLS                                                                    | Virginia DCLS                                                                                                          | 2020-04-03 | Virginia DCLS et al                                                                                                                                                      |
| USAVA-DCLS-0379/2020    | EPI_ISL_463136 | Virginia DCLS                                                                    | Pathogen Discovery, Respiratory Viruses Branch, Division of Viral Diseases, Centers for Disease Control and Prevention | 2020-05-13 | Virginia DCLS et al                                                                                                                                                      |
| USAWA-NH23/2020         | EPI_ISL_418790 | WA State Department of Health                                                    | Pathogen Discovery, Respiratory Viruses Branch, Division of Viral Diseases, Centers for Disease Control and Prevention | 2020-03-13 | Ying Tao et al B                                                                                                                                                         |
| USAWA-S1027/2020        | EPI_ISL_463517 | Washington State Department of Health                                            | Seattle Flu Study                                                                                                      | 2020-05-01 | Chu et al et al A                                                                                                                                                        |
| USAWA-S1032/2020        | EPI_ISL_463522 | Washington State Department of Health                                            | Seattle Flu Study                                                                                                      | 2020-05-01 | Chu et al et al A                                                                                                                                                        |
| USAWA-S1036/2020        | EPI_ISL_463526 | Washington State Department of Health                                            | Seattle Flu Study                                                                                                      | 2020-05-03 | Chu et al et al A                                                                                                                                                        |
| USAWA-S107/2020         | EPI_ISL_417160 | Washington State Department of Health                                            | Seattle Flu Study                                                                                                      | 2020-02-29 | Chu et al et al ( <a href="https://doi.org/10.1101/2020.04.02.20051417">https://doi.org/10.1101/2020.04.02.20051417</a> )                                                |
| USAWA-S1111/2020        | EPI_ISL_463601 | Washington State Department of Health                                            | Seattle Flu Study                                                                                                      | 2020-05-04 | Chu et al et al A                                                                                                                                                        |
| USAWA-S1119/2020        | EPI_ISL_463609 | Washington State Department of Health                                            | Seattle Flu Study                                                                                                      | 2020-05-04 | Chu et al et al A                                                                                                                                                        |
| USAWA-S1143/2020        | EPI_ISL_463633 | Washington State Department of Health                                            | Seattle Flu Study                                                                                                      | 2020-05-05 | Chu et al et al A                                                                                                                                                        |
| USAWA-S1156/2020        | EPI_ISL_463646 | Washington State Department of Health                                            | Seattle Flu Study                                                                                                      | 2020-05-04 | Chu et al et al A                                                                                                                                                        |
| USAWA-S1173/2020        | EPI_ISL_463663 | Washington State Department of Health                                            | Seattle Flu Study                                                                                                      | 2020-05-04 | Chu et al et al A                                                                                                                                                        |
| USAWA-S1178/2020        | EPI_ISL_463668 | Washington State Department of Health                                            | Seattle Flu Study                                                                                                      | 2020-05-06 | Chu et al et al A                                                                                                                                                        |
| USAWA-S119/2020         | EPI_ISL_417172 | Washington State Department of Health                                            | Seattle Flu Study                                                                                                      | 2020-02-29 | Chu et al et al ( <a href="https://doi.org/10.1101/2020.04.02.20051417">https://doi.org/10.1101/2020.04.02.20051417</a> )                                                |
| USAWA-S1190/2020        | EPI_ISL_463680 | Washington State Department of Health                                            | Seattle Flu Study                                                                                                      | 2020-05-05 | Chu et al et al A                                                                                                                                                        |
| USAWA-S1191/2020        | EPI_ISL_463681 | Washington State Department of Health                                            | Seattle Flu Study                                                                                                      | 2020-05-05 | Chu et al et al A                                                                                                                                                        |
| USAWA-S1215/2020        | EPI_ISL_463705 | Washington State Department of Health                                            | Seattle Flu Study                                                                                                      | 2020-05-07 | Chu et al et al A                                                                                                                                                        |
| USAWA-S2/2020           | EPI_ISL_413456 | Seattle Flu Study                                                                | Seattle Flu Study                                                                                                      | 2020-02-20 | Chu et al et al B ( <a href="https://doi.org/10.1101/2020.04.02.20051417">https://doi.org/10.1101/2020.04.02.20051417</a> )                                              |
| USAWA-S234/2020         | EPI_ISL_430272 | Washington State Department of Health                                            | Seattle Flu Study                                                                                                      | 2020-02-28 | Chu et al et al A                                                                                                                                                        |
| USAWA-S257/2020         | EPI_ISL_430295 | Washington State Department of Health                                            | Seattle Flu Study                                                                                                      | 2020-02-25 | Chu et al et al A                                                                                                                                                        |
| USAWA-S277/2020         | EPI_ISL_430131 | Seattle Flu Study                                                                | Seattle Flu Study                                                                                                      | 2020-02-22 | Chu et al et al A                                                                                                                                                        |
| USAWA-S281/2020         | EPI_ISL_430135 | Seattle Flu Study                                                                | Seattle Flu Study                                                                                                      | 2020-02-29 | Chu et al et al A                                                                                                                                                        |
| USAWA-S30/2020          | EPI_ISL_417083 | Washington State Department of Health                                            | Seattle Flu Study                                                                                                      | 2020-02-28 | Chu et al et al ( <a href="https://doi.org/10.1101/2020.04.02.20051417">https://doi.org/10.1101/2020.04.02.20051417</a> )                                                |
| USAWA-S397/2020         | EPI_ISL_434157 | Washington State Department of Health                                            | Seattle Flu Study                                                                                                      | 2020-03-25 | Chu et al et al A                                                                                                                                                        |
| USAWA-S44/2020          | EPI_ISL_417097 | Washington State Department of Health                                            | Seattle Flu Study                                                                                                      | 2020-02-28 | Chu et al et al ( <a href="https://doi.org/10.1101/2020.04.02.20051417">https://doi.org/10.1101/2020.04.02.20051417</a> )                                                |
| USAWA-S5/2020           | EPI_ISL_416460 | Seattle Flu Study                                                                | Seattle Flu Study                                                                                                      | 2020-02-29 | Chu et al et al B ( <a href="https://doi.org/10.1101/2020.04.02.20051417">https://doi.org/10.1101/2020.04.02.20051417</a> )                                              |
| USAWA-S55/2020          | EPI_ISL_417108 | Washington State Department of Health                                            | Seattle Flu Study                                                                                                      | 2020-02-29 | Chu et al et al B ( <a href="https://doi.org/10.1101/2020.04.02.20051417">https://doi.org/10.1101/2020.04.02.20051417</a> )                                              |
| USAWA-S6/2020           | EPI_ISL_416461 | Seattle Flu Study                                                                | Seattle Flu Study                                                                                                      | 2020-02-29 | Chu et al et al B ( <a href="https://doi.org/10.1101/2020.04.02.20051417">https://doi.org/10.1101/2020.04.02.20051417</a> )                                              |
| USAWA-S65/2020          | EPI_ISL_417118 | Washington State Department of Health                                            | Seattle Flu Study                                                                                                      | 2020-03-03 | Chu et al et al A                                                                                                                                                        |
| USAWA-S731/2020         | EPI_ISL_449901 | Washington State Department of Health                                            | Seattle Flu Study                                                                                                      | 2020-04-11 | Chu et al et al A                                                                                                                                                        |
| USAWA-S801/2020         | EPI_ISL_449971 | Washington State Department of Health                                            | Seattle Flu Study                                                                                                      | 2020-04-16 | Chu et al et al A                                                                                                                                                        |
| USAWA-S84/2020          | EPI_ISL_417137 | Washington State Department of Health                                            | Seattle Flu Study                                                                                                      | 2020-02-21 | Chu et al et al ( <a href="https://doi.org/10.1101/2020.04.02.20051417">https://doi.org/10.1101/2020.04.02.20051417</a> )                                                |
| USAWA-S89/2020          | EPI_ISL_417142 | Washington State Department of Health                                            | Seattle Flu Study                                                                                                      | 2020-02-29 | Chu et al et al ( <a href="https://doi.org/10.1101/2020.04.02.20051417">https://doi.org/10.1101/2020.04.02.20051417</a> )                                                |
| USAWA-S917/2020         | EPI_ISL_463407 | Washington State Department of Health                                            | Seattle Flu Study                                                                                                      | 2020-04-27 | Chu et al et al A                                                                                                                                                        |
| USAWA-S92/2020          | EPI_ISL_417145 | Washington State Department of Health                                            | Seattle Flu Study                                                                                                      | 2020-02-29 | Chu et al et al ( <a href="https://doi.org/10.1101/2020.04.02.20051417">https://doi.org/10.1101/2020.04.02.20051417</a> )                                                |
| USAWA-S939/2020         | EPI_ISL_463429 | Washington State Department of Health                                            | Seattle Flu Study                                                                                                      | 2020-04-23 | Chu et al et al A                                                                                                                                                        |
| USAWA-S95/2020          | EPI_ISL_417148 | Washington State Department of Health                                            | Seattle Flu Study                                                                                                      | 2020-02-28 | Chu et al et al ( <a href="https://doi.org/10.1101/2020.04.02.20051417">https://doi.org/10.1101/2020.04.02.20051417</a> )                                                |
| USAWA-S954/2020         | EPI_ISL_463444 | Washington State Department of Health                                            | Seattle Flu Study                                                                                                      | 2020-05-01 | Chu et al et al A                                                                                                                                                        |
| USAWA-S962/2020         | EPI_ISL_463452 | Washington State Department of Health                                            | Seattle Flu Study                                                                                                      | 2020-05-01 | Chu et al et al A                                                                                                                                                        |
| USAWA-S97/2020          | EPI_ISL_417150 | Washington State Department of Health                                            | Seattle Flu Study                                                                                                      | 2020-02-28 | Chu et al et al ( <a href="https://doi.org/10.1101/2020.04.02.20051417">https://doi.org/10.1101/2020.04.02.20051417</a> )                                                |
| USAWA-UW-10107/2020     | EPI_ISL_461466 | UW Virology Lab                                                                  | UW Virology Lab                                                                                                        | 2020-05-29 | Pavita Roychoudhury et al B                                                                                                                                              |
| USAWA-UW-10108/2020     | EPI_ISL_461467 | UW Virology Lab                                                                  | UW Virology Lab                                                                                                        | 2020-05-29 | Pavita Roychoudhury et al B                                                                                                                                              |
| USAWA-UW-3895/2020      | EPI_ISL_427203 | UW Virology Lab                                                                  | UW Virology Lab                                                                                                        | 2020-03-27 | Pavita Roychoudhury et al B                                                                                                                                              |
| USAWA-UW-5189/2020      | EPI_ISL_430873 | UW Virology Lab                                                                  | UW Virology Lab                                                                                                        | 2020-04-01 | Pavita Roychoudhury et al B                                                                                                                                              |
| USAWA-UW-5203/2020      | EPI_ISL_430899 | UW Virology Lab                                                                  | UW Virology Lab                                                                                                        | 2020-04-01 | Pavita Roychoudhury et al B                                                                                                                                              |
| USAWA-UW-5717/2020      | EPI_ISL_430913 | UW Virology Lab                                                                  | UW Virology Lab                                                                                                        | 2020-04-06 | Pavita Roychoudhury et al B                                                                                                                                              |
| USAWA-UW-5947/2020      | EPI_ISL_430932 | UW Virology Lab                                                                  | UW Virology Lab                                                                                                        | 2020-04-07 | Pavita Roychoudhury et al B<br>Pavita Roychoudhury et al A<br>( <a href="https://doi.org/10.1101/2020.04.02.20051417">https://doi.org/10.1101/2020.04.02.20051417</a> )  |
| USAWA-UW101/2020        | EPI_ISL_416639 | UW Virology Lab                                                                  | UW Virology Lab, Division of Viral Diseases, Centers for Disease Control and Prevention                                | 2020-03-10 | Queen et al ( <a href="https://doi.org/10.1101/2020.03.02.972955">https://doi.org/10.1101/2020.03.02.972955</a> )                                                        |
| USAWA1/2020             | EPI_ISL_404895 | Providence Regional Medical Center                                               | Division of Viral Diseases, Centers for Disease Control and Prevention                                                 | 2020-01-19 | Queen et al ( <a href="https://doi.org/10.1101/2020.03.02.972955">https://doi.org/10.1101/2020.03.02.972955</a> )                                                        |
| USAWA4-UW2/2020         | EPI_ISL_413455 | Washington State Public Health Lab                                               | University of Washington Virology Lab                                                                                  | 2020-02-28 | Pavita Roychoudhury et al A<br>( <a href="https://doi.org/10.1101/2020.04.02.20051417">https://doi.org/10.1101/2020.04.02.20051417</a> )                                 |
| USAWI-GMF-02274/2020    | EPI_ISL_436897 | Gundersen Molecular Diagnostics Laboratory                                       | Katara Cancer Research Institute                                                                                       | 2020-05-03 | Craig S. Richmond et al<br>( <a href="https://www.medrxiv.org/content/10.1101/2020.06.08.20125534v1">https://www.medrxiv.org/content/10.1101/2020.06.08.20125534v1</a> ) |
| USAWI-GMF-02381/2020    | EPI_ISL_436900 | Gundersen Molecular Diagnostics Laboratory                                       | Katara Cancer Research Institute                                                                                       | 2020-05-04 | Craig S. Richmond et al<br>( <a href="https://www.medrxiv.org/content/10.1101/2020.06.08.20125534v1">https://www.medrxiv.org/content/10.1101/2020.06.08.20125534v1</a> ) |
| USAWI-GMF-M0001/2020    | EPI_ISL_455573 | Gundersen Clinical Microbiology Laboratory                                       | Katara Cancer Research Institute                                                                                       | 2020-05-10 | Craig S. Richmond et al<br>( <a href="https://www.medrxiv.org/content/10.1101/2020.06.08.20125534v1">https://www.medrxiv.org/content/10.1101/2020.06.08.20125534v1</a> ) |
| USAWH-LW-112/2020       | EPI_ISL_425169 | University of Wisconsin-Madison AIDS Vaccine Research Laboratories               | Katara Cancer Research Institute                                                                                       | 2020-03-30 | Gage Moreno et al                                                                                                                                                        |
| USAWH-LW-223/2020       | EPI_ISL_428319 | University of Wisconsin-Madison AIDS Vaccine Research Laboratories               | University of Wisconsin-Madison AIDS Vaccine Research Laboratories                                                     | 2020-03-26 | Gage Moreno et al                                                                                                                                                        |
| USAWH-LW-329/2020       | EPI_ISL_436623 | University of Wisconsin-Madison AIDS Vaccine Research Laboratories               | University of Wisconsin-Madison AIDS Vaccine Research Laboratories                                                     | 2020-04-25 | Gage Moreno et al                                                                                                                                                        |
| USAWH1/2020             | EPI_ISL_408670 | Wisconsin Department of Health Services                                          | Pathogen Discovery, Respiratory Viruses Branch, Division of Viral Diseases, Centers for Disease Control and Prevention | 2020-01-31 | Jing Zhang et al ( <a href="https://doi.org/10.1101/2020.03.09.20032886">https://doi.org/10.1101/2020.03.09.20032886</a> )                                               |
| Vietnam/19-01S/2020     | EPI_ISL_418289 |                                                                                  | Microbiology and Immunology department                                                                                 | 2020-01-22 | Cao et al ( <a href="http://biorxiv.org/lookup/doi/10.1101/2020.04.01.019463">http://biorxiv.org/lookup/doi/10.1101/2020.04.01.019463</a> )                              |
| Vietnam/19-02S/2020     | EPI_ISL_418287 |                                                                                  | Microbiology and Immunology department                                                                                 | 2020-01-22 | Nguyen et al                                                                                                                                                             |
| Vietnam/39607/2020      | EPI_ISL_416428 | National Influenza Center, National Institute of Hygiene and Epidemiology (NIHE) | National Influenza Center, National Institute of Hygiene and Epidemiology (NIHE)                                       | 2020-03-07 | Le Quynh Mai et al                                                                                                                                                       |
| Vietnam/CM296/2020      | EPI_ISL_416431 | National Influenza Center, National Institute of Hygiene and Epidemiology (NIHE) | National Influenza Center, National Institute of Hygiene and Epidemiology (NIHE)                                       | 2020-03-06 | Le Quynh Mai et al                                                                                                                                                       |
| Vietnam/HCMC-05004/2020 | EPI_ISL_450738 | QUCRUHMT                                                                         | QUCRUHMT                                                                                                               | 2020-03-27 | Nguyen Van Vinh Chau et al                                                                                                                                               |
| Vietnam/HCMC-35016/2020 | EPI_ISL_450741 | QUCRUHMT                                                                         | QUCRUHMT                                                                                                               | 2020-03-20 | Nguyen Van Vinh Chau et al                                                                                                                                               |
| Vietnam/HCMC-35018/2020 | EPI_ISL_450742 | QUCRUHMT                                                                         | QUCRUHMT                                                                                                               | 2020-03-25 | Nguyen Van Vinh Chau et al                                                                                                                                               |
| Vietnam/HCMC-35019/2020 | EPI_ISL_450743 | QUCRUHMT                                                                         | QUCRUHMT                                                                                                               | 2020-03-24 | Nguyen Van Vinh Chau et al                                                                                                                                               |
| Vietnam/HCMC-35020/2020 | EPI_ISL_450744 | QUCRUHMT                                                                         | QUCRUHMT                                                                                                               | 2020-03-25 | Nguyen Van Vinh Chau et al                                                                                                                                               |
| Vietnam/HCMC-35021/2020 | EPI_ISL_450745 | QUCRUHMT                                                                         | QUCRUHMT                                                                                                               | 2020-03-26 | Nguyen Van Vinh Chau et al                                                                                                                                               |
| Vietnam/IBT-14Mar/2020  | EPI_ISL_448222 | Pasteur Institute Ho Chi Minh City                                               | National Key Laboratory of Gene Technology, Institute of Biotechnology, Vietnam Academy of Science and Technology      | 2020-03-15 | Le Tung Lam et al<br>( <a href="https://www.biorxiv.org/content/10.1101/2020.06.12.149377v1">https://www.biorxiv.org/content/10.1101/2020.06.12.149377v1</a> )           |
| Vietnam/VNHN_022/2020   | EPI_ISL_435303 | National Hospital of Tropical Diseases                                           | Oxford University Clinical Research Unit, Hanoi, Vietnam                                                               | 2020-03-07 | Nguyen Thi Tam et al                                                                                                                                                     |
| Vietnam/VNHN_026/2020   | EPI_ISL_435305 | National Hospital of Tropical Diseases                                           | Oxford University Clinical Research Unit, Hanoi, Vietnam                                                               | 2020-03-07 | Nguyen Thi Tam et al                                                                                                                                                     |
| Vietnam/VNHN_0299/2020  | EPI_ISL_435308 | National Hospital of Tropical Diseases                                           | Oxford University Clinical Research Unit, Hanoi, Vietnam                                                               | 2020-03-09 | Nguyen Thi Tam et al                                                                                                                                                     |
| Vietnam/VNHN_0300/2020  | EPI_ISL_435310 | National Hospital of Tropical Diseases                                           | Oxford University Clinical Research Unit, Hanoi, Vietnam                                                               | 2020-03-09 | Nguyen Thi Tam et al                                                                                                                                                     |
| Vietnam/VNHN_0418/2020  | EPI_ISL_435311 | National Hospital of Tropical Diseases                                           | Oxford University Clinical Research Unit, Hanoi, Vietnam                                                               | 2020-03-10 | Nguyen Thi Tam et al                                                                                                                                                     |
| Vietnam/VNHN_0784/2020  | EPI_ISL_435314 | National Hospital of Tropical Diseases                                           | Oxford University Clinical Research Unit, Hanoi, Vietnam                                                               | 2020-03-13 | Nguyen Thi Tam et al                                                                                                                                                     |
| Vietnam/VNHN_0837/2020  | EPI_ISL_435315 | National Hospital of Tropical Diseases                                           | Oxford University Clinical Research Unit, Hanoi, Vietnam                                                               | 2020-03-15 | Nguyen Thi Tam et al                                                                                                                                                     |
| Vietnam/VNHN_1072/2020  | EPI_ISL_455717 | National Hospital of Tropical Diseases                                           | Oxford University Clinical Research Unit, Hanoi, Vietnam                                                               | 2020-03-17 | Nguyen Thi Tam et al                                                                                                                                                     |
| Vietnam/VNHN_1098/2020  | EPI_ISL_455694 | National Hospital of Tropical Diseases                                           | Oxford University Clinical Research Unit, Hanoi, Vietnam                                                               | 2020-03-18 | Nguyen Thi Tam et al                                                                                                                                                     |
| Vietnam/VNHN_1226/2020  | EPI_ISL_455698 | National Hospital of Tropical Diseases                                           | Oxford University Clinical Research Unit, Hanoi, Vietnam                                                               | 2020-03-19 | Nguyen Thi Tam et al                                                                                                                                                     |
| Vietnam/VNHN_148/2020   | EPI_ISL_455713 | National Hospital of Tropical Diseases                                           | Oxford University Clinical Research Unit, Hanoi, Vietnam                                                               | 2020-03-06 | Nguyen Thi Tam et al                                                                                                                                                     |
| Vietnam/VNHN_149/2020   | EPI_ISL_455699 | National Hospital of Tropical Diseases                                           | Oxford University Clinical Research Unit, Hanoi, Vietnam                                                               | 2020-03-21 | Nguyen Thi Tam et al                                                                                                                                                     |
| Vietnam/VNHN_171/2020   | EPI_ISL_455701 | National Hospital of Tropical Diseases                                           | Oxford University Clinical Research Unit, Hanoi, Vietnam                                                               | 2020-03-23 | Nguyen Thi Tam et al                                                                                                                                                     |
| Vietnam/VNHN_2466/2020  | EPI_ISL_455714 | National Hospital of Tropical Diseases                                           | Oxford University Clinical Research Unit, Hanoi, Vietnam                                                               | 2020-03-25 | Nguyen Thi Tam et al                                                                                                                                                     |
| Vietnam/VNHN_301/2020   | EPI_ISL_455716 | National Hospital of Tropical Diseases                                           | Oxford University Clinical Research Unit, Hanoi, Vietnam                                                               | 2020-03-09 | Nguyen Thi Tam et al                                                                                                                                                     |
| Vietnam/VNHN_302/2020   | EPI_ISL_455715 | National Hospital of Tropical Diseases                                           | Oxford University Clinical Research Unit, Hanoi, Vietnam                                                               | 2020-03-09 | Nguyen Thi Tam et al                                                                                                                                                     |
| Vietnam/VNHN_3085/2020  | EPI_ISL_455703 | National Hospital of Tropical Diseases                                           | Oxford University Clinical Research Unit, Hanoi, Vietnam                                                               | 2020-03-27 | Nguyen Thi Tam et al                                                                                                                                                     |
| Vietnam/VNHN_3096/2020  | EPI_ISL_455702 | National Hospital of Tropical Diseases                                           | Oxford University Clinical Research Unit, Hanoi, Vietnam                                                               | 2020-03-27 | Nguyen Thi Tam et al                                                                                                                                                     |
| Vietnam/VNHN_3099/2020  | EPI_ISL_45     |                                                                                  |                                                                                                                        |            |                                                                                                                                                                          |



















|                                 |                |                                                                                                                                                                                                                                                                                       |                                                                                                              |            |                            |
|---------------------------------|----------------|---------------------------------------------------------------------------------------------------------------------------------------------------------------------------------------------------------------------------------------------------------------------------------------|--------------------------------------------------------------------------------------------------------------|------------|----------------------------|
| ItalyAMC1-4634/2020             | EPLI_SL_457825 | Army Medical Research Center - Scientific Department                                                                                                                                                                                                                                  | Army Medical and Veterinary Research Center                                                                  | 2020-03-25 | Silvia Filò et al          |
| ItalyAMC2-1245/2020             | EPLI_SL_457826 | Army Medical Center - Scientific Department                                                                                                                                                                                                                                           | Army Medical and Veterinary Research Center                                                                  | 2020-03-08 | Marina Ruccia et al        |
| ItalyBG-11639-28Feb/2020        | EPLI_SL_460080 | Molecular Virology Unit, Fondazione IRCCS Policlinico San Matteo - Pavia                                                                                                                                                                                                              | Laboratory of Virology, INMI Lazzaro Spallanzani IRCCS                                                       | 2020-02-28 | Antonio Piralla et al      |
| ItalyBG-5825-22Feb/2020         | EPLI_SL_460079 | Molecular Virology Unit, Fondazione IRCCS Policlinico San Matteo - Pavia                                                                                                                                                                                                              | Laboratory of Virology, INMI Lazzaro Spallanzani IRCCS                                                       | 2020-02-22 | Barbara Bartolini et al    |
| ItalyBG-7158-24Feb/2020         | EPLI_SL_460081 | Molecular Virology Unit, Fondazione IRCCS Policlinico San Matteo - Pavia                                                                                                                                                                                                              | Laboratory of Virology, INMI Lazzaro Spallanzani IRCCS                                                       | 2020-02-24 | Fausto Baldanti et al      |
| ItalyBG-9209-26Feb/2020         | EPLI_SL_460082 | Molecular Virology Unit, Fondazione IRCCS Policlinico San Matteo - Pavia                                                                                                                                                                                                              | Laboratory of Virology, INMI Lazzaro Spallanzani IRCCS                                                       | 2020-02-26 | Martina Ruccia et al       |
| ItalyBG-9225-26Feb/2020         | EPLI_SL_460083 | Molecular Virology Unit, Fondazione IRCCS Policlinico San Matteo - Pavia                                                                                                                                                                                                              | Laboratory of Virology, INMI Lazzaro Spallanzani IRCCS                                                       | 2020-02-26 | Martina Ruccia et al       |
| ItalyBS-1256-29Feb/2020         | EPLI_SL_460084 | Molecular Virology Unit, Fondazione IRCCS Policlinico San Matteo - Pavia                                                                                                                                                                                                              | Laboratory of Virology, INMI Lazzaro Spallanzani IRCCS                                                       | 2020-02-29 | Fausto Baldanti et al      |
| ItalyCDG1/2020                  | EPLI_SL_412973 | Department of Infectious Diseases, Istituto Superiore di Sanità, Roma, Italy                                                                                                                                                                                                          | Virology Laboratory, Scientific Department, Army Medical Center                                              | 2020-02-20 | Paola Stefanelli et al     |
| ItalyCR-13221-1Mar/2020         | EPLI_SL_460085 | Molecular Virology Unit, Fondazione IRCCS Policlinico San Matteo - Pavia                                                                                                                                                                                                              | Laboratory of Virology, INMI Lazzaro Spallanzani IRCCS                                                       | 2020-03-01 | Cesare E.M. Gruber et al   |
| ItalyCR-7070-24Feb/2020         | EPLI_SL_460086 | Molecular Virology Unit, Fondazione IRCCS Policlinico San Matteo - Pavia                                                                                                                                                                                                              | Laboratory of Virology, INMI Lazzaro Spallanzani IRCCS                                                       | 2020-02-24 | Maria R. Capobianchi et al |
| ItalyCR-9206-26Feb/2020         | EPLI_SL_460087 | Molecular Virology Unit, Fondazione IRCCS Policlinico San Matteo - Pavia                                                                                                                                                                                                              | Laboratory of Virology, INMI Lazzaro Spallanzani IRCCS                                                       | 2020-02-26 | Cesare E.M. Gruber et al   |
| ItalyCR-9214-26Feb/2020         | EPLI_SL_460088 | Molecular Virology Unit, Fondazione IRCCS Policlinico San Matteo - Pavia                                                                                                                                                                                                              | Laboratory of Virology, INMI Lazzaro Spallanzani IRCCS                                                       | 2020-02-26 | Martina Ruccia et al       |
| ItalyCR-9491-26Feb/2020         | EPLI_SL_460089 | Molecular Virology Unit, Fondazione IRCCS Policlinico San Matteo - Pavia                                                                                                                                                                                                              | Laboratory of Virology, INMI Lazzaro Spallanzani IRCCS                                                       | 2020-02-26 | Antonio Di Caro et al      |
| ItalyFVG-ICGEB_1/2020           | EPLI_SL_417418 | Laboratory of Molecular Virology International Center for Genetic Engineering and Biotechnology (ICGEB)                                                                                                                                                                               | ARGO Open Lab Platform for Genome sequencing                                                                 | 2020-03-01 | Licastro D et al           |
| ItalyFVG-ICGEB_S14/2020         | EPLI_SL_428853 | Laboratory of Molecular Virology International Center for Genetic Engineering and Biotechnology (ICGEB)                                                                                                                                                                               | ARGO Open Lab Platform for Genome Sequencing                                                                 | 2020-03-30 | Licastro D et al           |
| ItalyFVG-ICGEB_S18/2020         | EPLI_SL_428854 | Laboratory of Molecular Virology International Center for Genetic Engineering and Biotechnology (ICGEB)                                                                                                                                                                               | ARGO Open Lab Platform for Genome sequencing                                                                 | 2020-03-30 | Licastro D et al           |
| ItalyFVG-ICGEB_S5/2020          | EPLI_SL_417419 | Laboratory of Molecular Virology International Center for Genetic Engineering and Biotechnology (ICGEB)                                                                                                                                                                               | ARGO Open Lab Platform for Genome sequencing                                                                 | 2020-03-01 | Licastro D et al           |
| ItalyFVG-ICGEB_S8/2020          | EPLI_SL_417421 | Laboratory of Molecular Virology International Center for Genetic Engineering and Biotechnology (ICGEB)                                                                                                                                                                               | ARGO Open Lab Platform for Genome sequencing                                                                 | 2020-03-01 | Licastro D et al           |
| ItalyFVG-ICGEB_S9/2020          | EPLI_SL_417423 | Laboratory of Molecular Virology International Center for Genetic Engineering and Biotechnology (ICGEB)                                                                                                                                                                               | ARGO Open Lab Platform for Genome sequencing                                                                 | 2020-03-01 | Licastro D et al           |
| ItalyINMI-1/2020                | EPLI_SL_451298 | Laboratory of Virology, INMI Lazzaro Spallanzani IRCCS                                                                                                                                                                                                                                | Laboratory of Virology, INMI Lazzaro Spallanzani IRCCS                                                       | 2020-02-12 | Cesare E.M. Gruber et al   |
| ItalyINMI-1B/2020               | EPLI_SL_451299 | Laboratory of Virology, INMI Lazzaro Spallanzani IRCCS                                                                                                                                                                                                                                | Laboratory of Virology, INMI Lazzaro Spallanzani IRCCS                                                       | 2020-02-04 | Martina Ruccia et al       |
| ItalyINMI-1cs/2020              | EPLI_SL_410546 | INMI Lazzaro Spallanzani IRCCS                                                                                                                                                                                                                                                        | Laboratory of Virology, INMI Lazzaro Spallanzani IRCCS                                                       | 2020-01-29 | Maria R. Capobianchi et al |
| ItalyINMI-1N/2020               | EPLI_SL_451300 | Laboratory of Virology, INMI Lazzaro Spallanzani IRCCS                                                                                                                                                                                                                                | Laboratory of Virology, INMI Lazzaro Spallanzani IRCCS                                                       | 2020-02-03 | Cesare E.M. Gruber et al   |
| ItalyINMI1/2020                 | EPLI_SL_423434 | INMI Lazzaro Spallanzani IRCCS                                                                                                                                                                                                                                                        | Laboratory of Virology, INMI Lazzaro Spallanzani IRCCS                                                       | 2020-03-04 | Eleonora Lalle et al       |
| ItalyINMI11B/2020               | EPLI_SL_451304 | Laboratory of Virology, INMI Lazzaro Spallanzani IRCCS                                                                                                                                                                                                                                | Laboratory of Virology, INMI Lazzaro Spallanzani IRCCS                                                       | 2020-03-23 | Cesare E.M. Gruber et al   |
| ItalyINMI11N/2020               | EPLI_SL_451305 | Laboratory of Virology, INMI Lazzaro Spallanzani IRCCS                                                                                                                                                                                                                                | Laboratory of Virology, INMI Lazzaro Spallanzani IRCCS                                                       | 2020-03-23 | Martina Ruccia et al       |
| ItalyINMI2-1/2020               | EPLI_SL_451302 | Laboratory of Virology, INMI Lazzaro Spallanzani IRCCS                                                                                                                                                                                                                                | Laboratory of Virology, INMI Lazzaro Spallanzani IRCCS                                                       | 2020-01-30 | Cesare E.M. Gruber et al   |
| ItalyINMI3/2020                 | EPLI_SL_417921 | INMI Lazzaro Spallanzani IRCCS                                                                                                                                                                                                                                                        | Laboratory of Virology, INMI Lazzaro Spallanzani IRCCS                                                       | 2020-03-01 | Martina Ruccia et al       |
| ItalyINMI4/2020                 | EPLI_SL_417922 | INMI Lazzaro Spallanzani IRCCS                                                                                                                                                                                                                                                        | Laboratory of Virology, INMI Lazzaro Spallanzani IRCCS                                                       | 2020-02-28 | Cesare E.M. Gruber et al   |
| ItalyINMI5-N/2020               | EPLI_SL_451303 | Laboratory of Virology, INMI Lazzaro Spallanzani IRCCS                                                                                                                                                                                                                                | Laboratory of Virology, INMI Lazzaro Spallanzani IRCCS                                                       | 2020-03-04 | Martina Ruccia et al       |
| ItalyINMI5/2020                 | EPLI_SL_417923 | INMI Lazzaro Spallanzani IRCCS                                                                                                                                                                                                                                                        | Laboratory of Virology, INMI Lazzaro Spallanzani IRCCS                                                       | 2020-03-04 | Francesco Messina et al    |
| ItalyINMI6/2020                 | EPLI_SL_419254 | INMI Lazzaro Spallanzani IRCCS                                                                                                                                                                                                                                                        | Laboratory of Virology, INMI Lazzaro Spallanzani IRCCS                                                       | 2020-03-23 | Barbara Bartolini et al    |
| ItalyINMI7/2020                 | EPLI_SL_419255 | INMI Lazzaro Spallanzani IRCCS                                                                                                                                                                                                                                                        | INMI Lazzaro Spallanzani IRCCS                                                                               | 2020-03-23 | Antonio Di Caro et al      |
| ItalyINMI8/2020                 | EPLI_SL_423432 | INMI Lazzaro Spallanzani IRCCS                                                                                                                                                                                                                                                        | Laboratory of Virology, INMI Lazzaro Spallanzani IRCCS                                                       | 2020-03-07 | Concetta Castilletti et al |
| ItalyINMI9/2020                 | EPLI_SL_423433 | INMI Lazzaro Spallanzani IRCCS                                                                                                                                                                                                                                                        | Laboratory of Virology, INMI Lazzaro Spallanzani IRCCS                                                       | 2020-03-23 | Fabrizio Carletti et al    |
| ItalyIZSPB_1259/2020            | EPLI_SL_451862 | Istituto Zooprofilattico Sperimentale Puglia e Basilicata, Dipartimento di Bioscienze, Biotecnologie e Biofarmaceutica dell'Università degli Studi di Bari "A.Moro", Istituto di Biomedicina, Bioenergetica e Biotecnologie Molecolari del Consiglio Nazionale delle Ricerche di Bari | Beoinlab (Bioinformatics, Evolution and Comparative Genomics lab), Dept. of Biosciences, University of Milan | 2020-03-20 | Parisi A. et al            |
| ItalyIZSPB_703/2020             | EPLI_SL_468914 | Istituto Zooprofilattico Sperimentale Puglia e Basilicata, Dipartimento di Bioscienze, Biotecnologie e Biofarmaceutica dell'Università degli Studi di Bari "A.Moro", Istituto di Biomedicina, Bioenergetica e Biotecnologie Molecolari del Consiglio Nazionale delle Ricerche di Bari | Beoinlab (Bioinformatics, Evolution and Comparative Genomics lab), Dept. of Biosciences, University of Milan | 2020-03-18 | Parisi A. et al            |
| ItalyIZSPB_706/2020             | EPLI_SL_469016 | Istituto Zooprofilattico Sperimentale Puglia e Basilicata, Dipartimento di Bioscienze, Biotecnologie e Biofarmaceutica dell'Università degli Studi di Bari "A.Moro", Istituto di Biomedicina, Bioenergetica e Biotecnologie Molecolari del Consiglio Nazionale delle Ricerche di Bari | Beoinlab (Bioinformatics, Evolution and Comparative Genomics lab), Dept. of Biosciences, University of Milan | 2020-03-18 | Parisi A. et al            |
| ItalyIZSPB_802/2020             | EPLI_SL_469018 | Istituto Zooprofilattico Sperimentale Puglia e Basilicata, Dipartimento di Bioscienze, Biotecnologie e Biofarmaceutica dell'Università degli Studi di Bari "A.Moro", Istituto di Biomedicina, Bioenergetica e Biotecnologie Molecolari del Consiglio Nazionale delle Ricerche di Bari | Beoinlab (Bioinformatics, Evolution and Comparative Genomics lab), Dept. of Biosciences, University of Milan | 2020-03-19 | Parisi A. et al            |
| ItalyIZSPB_804/2020             | EPLI_SL_469019 | Istituto Zooprofilattico Sperimentale Puglia e Basilicata, Dipartimento di Bioscienze, Biotecnologie e Biofarmaceutica dell'Università degli Studi di Bari "A.Moro", Istituto di Biomedicina, Bioenergetica e Biotecnologie Molecolari del Consiglio Nazionale delle Ricerche di Bari | Beoinlab (Bioinformatics, Evolution and Comparative Genomics lab), Dept. of Biosciences, University of Milan | 2020-03-20 | Parisi A. et al            |
| ItalyIZSPB_809/2020             | EPLI_SL_469020 | Istituto Zooprofilattico Sperimentale Puglia e Basilicata, Dipartimento di Bioscienze, Biotecnologie e Biofarmaceutica dell'Università degli Studi di Bari "A.Moro", Istituto di Biomedicina, Bioenergetica e Biotecnologie Molecolari del Consiglio Nazionale delle Ricerche di Bari | Beoinlab (Bioinformatics, Evolution and Comparative Genomics lab), Dept. of Biosciences, University of Milan | 2020-03-19 | Parisi A. et al            |
| ItalyIZSPB_813/2020             | EPLI_SL_469021 | Istituto Zooprofilattico Sperimentale Puglia e Basilicata, Dipartimento di Bioscienze, Biotecnologie e Biofarmaceutica dell'Università degli Studi di Bari "A.Moro", Istituto di Biomedicina, Bioenergetica e Biotecnologie Molecolari del Consiglio Nazionale delle Ricerche di Bari | Beoinlab (Bioinformatics, Evolution and Comparative Genomics lab), Dept. of Biosciences, University of Milan | 2020-03-20 | Parisi A. et al            |
| ItalyIZSPB_847/2020             | EPLI_SL_469022 | Istituto Zooprofilattico Sperimentale Puglia e Basilicata, Dipartimento di Bioscienze, Biotecnologie e Biofarmaceutica dell'Università degli Studi di Bari "A.Moro", Istituto di Biomedicina, Bioenergetica e Biotecnologie Molecolari del Consiglio Nazionale delle Ricerche di Bari | Beoinlab (Bioinformatics, Evolution and Comparative Genomics lab), Dept. of Biosciences, University of Milan | 2020-03-20 | Parisi A. et al            |
| ItalyIZSPB_857/2020             | EPLI_SL_469023 | Istituto Zooprofilattico Sperimentale Puglia e Basilicata, Dipartimento di Bioscienze, Biotecnologie e Biofarmaceutica dell'Università degli Studi di Bari "A.Moro", Istituto di Biomedicina, Bioenergetica e Biotecnologie Molecolari del Consiglio Nazionale delle Ricerche di Bari | Beoinlab (Bioinformatics, Evolution and Comparative Genomics lab), Dept. of Biosciences, University of Milan | 2020-03-20 | Parisi A. et al            |
| ItalyIZSPB_CL1/2020             | EPLI_SL_451861 | Istituto Zooprofilattico Sperimentale Puglia e Basilicata, Dipartimento di Bioscienze, Biotecnologie e Biofarmaceutica dell'Università degli Studi di Bari "A.Moro", Istituto di Biomedicina, Bioenergetica e Biotecnologie Molecolari del Consiglio Nazionale delle Ricerche di Bari | Beoinlab (Bioinformatics, Evolution and Comparative Genomics lab), Dept. of Biosciences, University of Milan | 2020-03-14 | Parisi A. et al            |
| ItalyLO-11550-28Feb/2020        | EPLI_SL_460090 | Molecular Virology Unit, Fondazione IRCCS Policlinico San Matteo - Pavia                                                                                                                                                                                                              | Laboratory of Virology, INMI Lazzaro Spallanzani IRCCS                                                       | 2020-02-28 | Antonio Piralla et al      |
| ItalyLO-13075-B/2020            | EPLI_SL_451308 | Molecular Virology Unit, Fondazione IRCCS Policlinico San Matteo - Pavia                                                                                                                                                                                                              | Laboratory of Virology, INMI Lazzaro Spallanzani IRCCS                                                       | 2020-03-01 | Antonio Piralla et al      |
| ItalyLO-13075-N/2020            | EPLI_SL_451309 | Molecular Virology Unit, Fondazione IRCCS Policlinico San Matteo - Pavia                                                                                                                                                                                                              | Laboratory of Virology, INMI Lazzaro Spallanzani IRCCS                                                       | 2020-03-01 | Fausto Baldanti et al      |
| ItalyMI-5825-22Feb/2020         | EPLI_SL_460091 | Molecular Virology Unit, Fondazione IRCCS Policlinico San Matteo - Pavia                                                                                                                                                                                                              | Laboratory of Virology, INMI Lazzaro Spallanzani IRCCS                                                       | 2020-02-22 | Antonio Di Caro et al      |
| ItalyPV-11951-28Feb/2020        | EPLI_SL_460092 | Molecular Virology Unit, Fondazione IRCCS Policlinico San Matteo - Pavia                                                                                                                                                                                                              | Laboratory of Virology, INMI Lazzaro Spallanzani IRCCS                                                       | 2020-02-28 | Cesare E.M. Gruber et al   |
| ItalyPV-12578-29Feb/2020        | EPLI_SL_460093 | Molecular Virology Unit, Fondazione IRCCS Policlinico San Matteo - Pavia                                                                                                                                                                                                              | Laboratory of Virology, INMI Lazzaro Spallanzani IRCCS                                                       | 2020-02-29 | Maria R. Capobianchi et al |
| ItalyPV-5314-B/2020             | EPLI_SL_451306 | Molecular Virology Unit, Fondazione IRCCS Policlinico San Matteo - Pavia                                                                                                                                                                                                              | Laboratory of Virology, INMI Lazzaro Spallanzani IRCCS                                                       | 2020-02-21 | Antonio Piralla et al      |
| ItalyPV-5314-N/2020             | EPLI_SL_451307 | Molecular Virology Unit, Fondazione IRCCS Policlinico San Matteo - Pavia                                                                                                                                                                                                              | Laboratory of Virology, INMI Lazzaro Spallanzani IRCCS                                                       | 2020-02-21 | Fausto Baldanti et al      |
| ItalyPV-9058-25Feb/2020         | EPLI_SL_460094 | Molecular Virology Unit, Fondazione IRCCS Policlinico San Matteo - Pavia                                                                                                                                                                                                              | Laboratory of Virology, INMI Lazzaro Spallanzani IRCCS                                                       | 2020-02-25 | Barbara Bartolini et al    |
| ItalyPV-9675-26Feb/2020         | EPLI_SL_460095 | Molecular Virology Unit, Fondazione IRCCS Policlinico San Matteo - Pavia                                                                                                                                                                                                              | Laboratory of Virology, INMI Lazzaro Spallanzani IRCCS                                                       | 2020-02-26 | Barbara Bartolini et al    |
| ITALYSandrinaNuoro04039046/2020 | EPLI_SL_458084 | Laboratorio Biologia Molecolare Sant'Coè - UOC Laboratorio Analisi - Servizio Medicina di Laboratorio, Ospedale "San Francesco" - ATS-ASSL Nuoro                                                                                                                                      | Laboratorio specialistico UOC Ematologia - Ospedale "San Francesco" - ATS-ASSL Nuoro                         | 2020-04-03 | Piras Giovanna et al       |
| ITALYSandrinaNuoroCOV28/2020    | EPLI_SL_458085 | Laboratorio Biologia Molecolare Sant'Coè - UOC Laboratorio Analisi - Servizio Medicina di Laboratorio, Ospedale "San Francesco" - ATS-ASSL Nuoro                                                                                                                                      | Laboratorio specialistico UOC Ematologia - Ospedale "San Francesco" - ATS-ASSL Nuoro                         | 2020-04-12 | Piras Giovanna et al       |
| ItalySiens1-10/2020             | EPLI_SL_454733 |                                                                                                                                                                                                                                                                                       | Department of Medical                                                                                        | 2020-03-01 | Cusi et al                 |
| ItalySPL1/2020                  | EPLI_SL_412974 | Department of Infectious Diseases, Istituto Superiore di Sanità, Roma, Italy                                                                                                                                                                                                          | Virology Laboratory, Scientific Department, Army Medical Center                                              | 2020-01-29 | Paola Stefanelli et al     |
| ItalyTE12337/2020               | EPLI_SL_435146 | Villa Serena del Dr. Leonardo Petrucci                                                                                                                                                                                                                                                | Istituto Zooprofilattico Sperimentale dell'Abruzzo e Molise "G. Caporale"                                    | 2020-04-07 | Luossio A et al            |
| ItalyTE12759/2020               | EPLI_SL_435147 | Villa Serena del Dr. Leonardo Petrucci                                                                                                                                                                                                                                                | Istituto Zooprofilattico Sperimentale dell'Abruzzo e Molise "G. Caporale"                                    | 2020-04-08 | Luossio A et al            |
| ItalyTE12774/2020               | EPLI_SL_435150 | Ospedale SS Annunziata                                                                                                                                                                                                                                                                | Istituto Zooprofilattico Sperimentale dell'Abruzzo e Molise "G. Caporale"                                    | 2020-04-08 | Luossio A et al            |
| ItalyTE13457/2020               | EPLI_SL_435149 | SERVIZIO DI IGIENE E SANITÀ PUBBLICA ASL Teramo                                                                                                                                                                                                                                       | Istituto Zooprofilattico Sperimentale dell'Abruzzo e Molise "G. Caporale"                                    | 2020-04-08 | Luossio A et al            |
| ItalyTE13484/2020               | EPLI_SL_435151 | Ospedale SS Annunziata                                                                                                                                                                                                                                                                | Istituto Zooprofilattico Sperimentale dell'Abruzzo e Molise "G. Caporale"                                    | 2020-04-08 | Luossio A et al            |
| ItalyTE13491/2020               | EPLI_SL_435148 | Ospedale SS Annunziata                                                                                                                                                                                                                                                                | Istituto Zooprofilattico Sperimentale dell'Abruzzo e Molise "G. Caporale"                                    | 2020-04-08 | Luossio A et al            |
| ItalyTE13856/2020               | EPLI_SL_435152 | Servizio di Igiene, Epidemiologia e Sanità Pubblica (SIESP) Avezzano                                                                                                                                                                                                                  | Istituto Zooprofilattico Sperimentale dell'Abruzzo e Molise "G. Caporale"                                    | 2020-04-09 | Luossio A et al            |
| ItalyTE14162/2020               | EPLI_SL_435154 | SERVIZIO DI IGIENE E SANITÀ PUBBLICA ASL Teramo                                                                                                                                                                                                                                       | Istituto Zooprofilattico Sperimentale dell'Abruzzo e Molise "G. Caporale"                                    | 2020-04-09 | Luossio A et al            |
| ItalyTE14168/2020               | EPLI_SL_435155 | SERVIZIO DI IGIENE E SANITÀ PUBBLICA ASL Teramo                                                                                                                                                                                                                                       | Istituto Zooprofilattico Sperimentale dell'Abruzzo e Molise "G. Caporale"                                    | 2020-04-09 | Luossio A et al            |
| ItalyTE14297/2020               | EPLI_SL_435153 | SERVIZIO DI IGIENE E SANITÀ PUBBLICA ASL Teramo                                                                                                                                                                                                                                       | Istituto Zooprofilattico Sperimentale dell'Abruzzo e Molise "G. Caporale"                                    | 2020-04-09 | Luossio A et al            |
| ItalyTE26423/2020               | EPLI_SL_436731 | Ospedale Civile S. Liberatore di Atri                                                                                                                                                                                                                                                 | Istituto Zooprofilattico Sperimentale dell'Abruzzo e Molise "G. Caporale"                                    | 2020-04-26 | Luossio A et al            |
| ItalyTE26425/2020               | EPLI_SL_436732 | Ospedale Civile S. Liberatore di Atri                                                                                                                                                                                                                                                 | Istituto Zooprofilattico Sperimentale dell'Abruzzo e Molise "G. Caporale"                                    | 2020-04-27 | Luossio A et al            |
| ItalyTE26533/2020               | EPLI_SL_436728 | SERVIZIO DI IGIENE E SANITÀ PUBBLICA ASL Teramo                                                                                                                                                                                                                                       | Istituto Zooprofilattico Sperimentale dell'Abruzzo e Molise "G. Caporale"                                    | 2020-04-27 | Luossio A et al            |
| ItalyTE26539/2020               | EPLI_SL_436727 | SERVIZIO DI IGIENE E SANITÀ PUBBLICA ASL Teramo                                                                                                                                                                                                                                       | Istituto Zooprofilattico Sperimentale dell'Abruzzo e Molise "G. Caporale"                                    | 2020-04-27 | Luossio A et al            |
| ItalyTE26540/2020               | EPLI_SL_436728 | SERVIZIO DI IGIENE E SANITÀ PUBBLICA ASL Teramo                                                                                                                                                                                                                                       | Istituto Zooprofilattico Sperimentale dell'Abruzzo e Molise "G. Caporale"                                    | 2020-04-27 | Luossio A et al            |
| ItalyTE26643/2020               | EPLI_SL_436729 | SERVIZIO DI IGIENE E SANITÀ PUBBLICA ASL Teramo                                                                                                                                                                                                                                       | Istituto Zooprofilattico Sperimentale dell'Abruzzo e Molise "G. Caporale"                                    | 2020-04-27 | Luossio A et al            |
| ItalyTE27020/2020               | EPLI_SL_436725 | RSARP Villa San Giovanni - Gruppo Edos                                                                                                                                                                                                                                                | Istituto Zooprofilattico Sperimentale dell'Abruzzo e Molise "G. Caporale"                                    | 2020-04-27 | Luossio A et al            |
| ItalyTE4836/2020                | EPLI_SL_418260 | Ospedale Civile Giuseppe Mazzini                                                                                                                                                                                                                                                      | Istituto Zooprofilattico Sperimentale dell'Abruzzo e Molise "G. Caporale"                                    | 2020-03-16 | Luossio A et al            |
| ItalyTE4880/2020                | EPLI_SL_418258 | Ospedale "San Liberatore" di Atri                                                                                                                                                                                                                                                     | Istituto Zooprofilattico Sperimentale dell'Abruzzo e Molise "G. Caporale"                                    | 2020-03-14 | Luossio A et al            |
| ItalyTE4925/2020                | EPLI_SL_418255 | Presidio Ospedaliero "S. Spirito" - PESCARA                                                                                                                                                                                                                                           | Istituto Zooprofilattico Sperimentale dell'Abruzzo e Molise "G. Caporale"                                    | 2020-03-14 | Luossio A et al            |
| ItalyTE4963/2020                | EPLI_SL_418258 | Presidio ospedaliero "Santo Spirito"                                                                                                                                                                                                                                                  | Istituto Zooprofilattico Sperimentale dell'Abruzzo e Molise "G. Caporale"                                    | 2020-03-14 | Luossio A et al            |
| ItalyTE5062/2020                | EPLI_SL_418261 | Ospedale Civile Giuseppe Mazzini                                                                                                                                                                                                                                                      | Istituto Zooprofilattico Sperimentale dell'Abruzzo e Molise "G. Caporale"                                    | 2020-03-17 | Luossio A et al            |
| ItalyTE5066/2020                | EPLI_SL_418257 | Ospedale Civile Giuseppe Mazzini, Teramo                                                                                                                                                                                                                                              | Istituto Zooprofilattico Sperimentale dell'Abruzzo e Molise "G. Caporale"                                    | 2020-03-17 | Luossio A et al            |
| ItalyTE5166/2020                | EPLI_SL_420563 | Ospedale Civile Giuseppe Mazzini                                                                                                                                                                                                                                                      | Istituto Zooprofilattico Sperimentale dell'Abruzzo e Molise "G. Caporale"                                    | 2020-03-18 | Luossio A et al            |
| ItalyTE5472/2020                | EPLI_SL_420564 | Ospedale Civile Castel Di Sangro                                                                                                                                                                                                                                                      | Istituto Zooprofilattico Sperimentale dell'Abruzzo e Molise "G. Caporale"                                    | 2020-03-19 | Luossio A et al            |
| ItalyTE5473/2020                | EPLI_SL_436718 | Ospedale Regionale San Salvatore                                                                                                                                                                                                                                                      | Istituto Zooprofilattico Sperimentale dell'Abruzzo e Molise "G. Caporale"                                    | 2020-03-19 | Luossio A et al            |
| ItalyTE5476/2020                | EPLI_SL_420565 | Ospedale Civile Giuseppe Mazzini                                                                                                                                                                                                                                                      | Istituto Zooprofilattico Sperimentale dell'Abruzzo e Molise "G. Caporale"                                    | 2020-03-19 | Luossio A et al            |
| ItalyTE5512/2020                | EPLI_SL_420566 | Ospedale Regionale San Salvatore                                                                                                                                                                                                                                                      | Istituto Zooprofilattico Sperimentale dell'Abruzzo e Molise "G. Caporale"                                    | 2020-03-19 | Luossio A et al            |
| ItalyTE5541/2020                | EPLI_SL_436719 | Ospedale Civile S. Liberatore di Atri                                                                                                                                                                                                                                                 | Istituto Zooprofilattico Sperimentale dell'Abruzzo e Molise "G. Caporale"                                    | 2020-03-20 | Luossio A et al            |
| ItalyTE5543/2020                | EPLI_SL_436720 | Ospedale Civile S. Liberatore di Atri                                                                                                                                                                                                                                                 | Istituto Zooprofilattico Sperimentale dell'Abruzzo e Molise "G. Caporale"                                    | 2020-03-20 | Luossio A et al            |
| ItalyTE5545/2020                | EPLI_SL_436721 | Ospedale Civile S. Liberatore di Atri                                                                                                                                                                                                                                                 | Istituto Zooprofilattico Sperimentale dell'Abruzzo e Molise "G. Caporale"                                    | 2020-03-20 | Luossio A et al            |
| ItalyTE5547/2020                | EPLI_SL_436722 | Ospedale Civile S. Liberatore di Atri                                                                                                                                                                                                                                                 | Istituto Zooprofilattico Sperimentale dell'Abruzzo e Molise "G. Caporale"                                    | 2020-03-20 | Luossio A et al            |
| ItalyTE5551/2020                | EPLI_SL_429226 | Presidio Ospedaliero Santo Spirito                                                                                                                                                                                                                                                    | Istituto Zooprofilattico Sperimentale dell'Abruzzo e Molise "G. Caporale"                                    | 2020-03-17 | Luossio A et al            |
| ItalyTE5553/2020                | EPLI_SL_429227 | Presidio Ospedaliero Santo Spirito                                                                                                                                                                                                                                                    | Istituto Zooprofilattico Sperimentale dell'Abruzzo e Molise "G. Caporale"                                    | 2020-03-17 | Luossio A et al            |
| ItalyTE5567/2020                | EPLI_SL_429228 | Ospedale Civile Giuseppe Mazzini                                                                                                                                                                                                                                                      | Istituto Zooprofilattico Sperimentale dell'Abruzzo e Molise "G. Caporale"                                    | 2020-03-20 | Luossio A et al            |
| ItalyTE5568/2020                | EPLI_SL_436723 | Ospedale Regionale San Salvatore                                                                                                                                                                                                                                                      | Istituto Zooprofilattico Sperimentale dell'Abruzzo e Molise "G. Caporale"                                    | 2020-03-20 | Luossio A et al            |
| ItalyTE5780/2020                | EPLI_SL_420567 | Ospedale Regionale San Salvatore                                                                                                                                                                                                                                                      | Istituto Zooprofilattico Sperimentale dell'Abruzzo e Molise "G. Caporale"                                    | 2020-03-21 | Luossio A et al            |
| ItalyTE5827/2020                | EPLI_SL_436724 | Ospedale Civile S. Liberatore di Atri                                                                                                                                                                                                                                                 | Istituto Zooprofilattico Sperimentale dell'Abruzzo e Molise "G. Caporale"                                    | 2020-03-21 | Luossio A et al            |
| ItalyTE5835/2020                | EPLI_SL_429229 | Ospedale Regionale San Salvatore                                                                                                                                                                                                                                                      | Istituto Zooprofilattico Sperimentale dell'Abruzzo e Molise "G. Caporale"                                    | 2020-03-21 | Luossio A et al            |
| ItalyTE1955/2020                | EPLI_SL_420569 | Ospedale Civile Giuseppe Mazzini                                                                                                                                                                                                                                                      | Istituto Zooprofilattico Sperimentale dell'Abruzzo e Molise "G. Caporale"                                    | 2020-03-23 | Luossio A et al            |











|                           |                |                                                                                  |                                                                                                                                                                                                                            |            |                                                                                                                                      |
|---------------------------|----------------|----------------------------------------------------------------------------------|----------------------------------------------------------------------------------------------------------------------------------------------------------------------------------------------------------------------------|------------|--------------------------------------------------------------------------------------------------------------------------------------|
| Switzerland/GE0056/2020   | EPI_ISL_429212 | University Hospitals of Geneva Laboratory of Virology                            | University Hospitals of Geneva Laboratory of Virology                                                                                                                                                                      | 2020-03-24 | Laubscher F. et al                                                                                                                   |
| Switzerland/GE0199-2/2020 | EPI_ISL_429197 | University Hospitals of Geneva Laboratory of Virology                            | University Hospitals of Geneva Laboratory of Virology                                                                                                                                                                      | 2020-03-21 | Laubscher F. et al                                                                                                                   |
| Switzerland/GE0199/2020   | EPI_ISL_415455 | Hôpitaux universitaires de Genève Laboratoire de Virologie                       | Hôpitaux universitaires de Genève Laboratoire de Virologie                                                                                                                                                                 | 2020-02-28 | Laubscher F. et al                                                                                                                   |
| Switzerland/GE0304/2020   | EPI_ISL_429218 | University Hospitals of Geneva Laboratory of Virology                            | University Hospitals of Geneva Laboratory of Virology                                                                                                                                                                      | 2020-04-02 | Laubscher F. et al                                                                                                                   |
| Switzerland/GE06207/2020  | EPI_ISL_415706 | Hôpitaux universitaires de Genève Laboratoire de Virologie                       | Hôpitaux universitaires de Genève Laboratoire de Virologie                                                                                                                                                                 | 2020-03-06 | Laubscher F. et al                                                                                                                   |
| Switzerland/GE0638/2020   | EPI_ISL_429199 | University Hospitals of Geneva Laboratory of Virology                            | University Hospitals of Geneva Laboratory of Virology                                                                                                                                                                      | 2020-03-22 | Laubscher F. et al                                                                                                                   |
| Switzerland/GE1184/2020   | EPI_ISL_429207 | University Hospitals of Geneva Laboratory of Virology                            | University Hospitals of Geneva Laboratory of Virology                                                                                                                                                                      | 2020-04-03 | Laubscher F. et al                                                                                                                   |
| Switzerland/GE1402/2020   | EPI_ISL_415700 | Hôpitaux universitaires de Genève Laboratoire de Virologie                       | Hôpitaux universitaires de Genève Laboratoire de Virologie                                                                                                                                                                 | 2020-02-28 | Laubscher F. et al                                                                                                                   |
| Switzerland/GE1422/2020   | EPI_ISL_415454 | Hôpitaux universitaires de Genève Laboratoire de Virologie                       | Hôpitaux universitaires de Genève Laboratoire de Virologie                                                                                                                                                                 | 2020-02-28 | Laubscher F. et al                                                                                                                   |
| Switzerland/GE1738/2020   | EPI_ISL_429203 | University Hospitals of Geneva Laboratory of Virology                            | University Hospitals of Geneva Laboratory of Virology                                                                                                                                                                      | 2020-03-21 | Laubscher F. et al                                                                                                                   |
| Switzerland/GE2164/2020   | EPI_ISL_429208 | University Hospitals of Geneva Laboratory of Virology                            | University Hospitals of Geneva Laboratory of Virology                                                                                                                                                                      | 2020-03-17 | Laubscher F. et al                                                                                                                   |
| Switzerland/GE2297/2020   | EPI_ISL_429201 | University Hospitals of Geneva Laboratory of Virology                            | University Hospitals of Geneva Laboratory of Virology                                                                                                                                                                      | 2020-03-29 | Laubscher F. et al                                                                                                                   |
| Switzerland/GE2453/2020   | EPI_ISL_429219 | University Hospitals of Geneva Laboratory of Virology                            | University Hospitals of Geneva Laboratory of Virology                                                                                                                                                                      | 2020-04-03 | Laubscher F. et al                                                                                                                   |
| Switzerland/GE2759/2020   | EPI_ISL_429214 | University Hospitals of Geneva Laboratory of Virology                            | University Hospitals of Geneva Laboratory of Virology                                                                                                                                                                      | 2020-03-23 | Laubscher F. et al                                                                                                                   |
| Switzerland/GE3121/2020   | EPI_ISL_414019 | Laboratoire de Virologie, HUG                                                    | Swiss National Reference Centre for Influenza                                                                                                                                                                              | 2020-02-27 | LAUBSCHER Florian et al. et al                                                                                                       |
| Switzerland/GE3144/2020   | EPI_ISL_429196 | University Hospitals of Geneva Laboratory of Virology                            | University Hospitals of Geneva Laboratory of Virology                                                                                                                                                                      | 2020-03-18 | Laubscher F. et al                                                                                                                   |
| Switzerland/GE3650/2020   | EPI_ISL_429209 | University Hospitals of Geneva Laboratory of Virology                            | University Hospitals of Geneva Laboratory of Virology                                                                                                                                                                      | 2020-03-16 | Laubscher F. et al                                                                                                                   |
| Switzerland/GE3655/2020   | EPI_ISL_429222 | University Hospitals of Geneva Laboratory of Virology                            | University Hospitals of Geneva Laboratory of Virology                                                                                                                                                                      | 2020-04-07 | Laubscher F. et al                                                                                                                   |
| Switzerland/GE3895/2020   | EPI_ISL_413997 | Laboratoire de Virologie, HUG                                                    | Swiss National Reference Centre for Influenza                                                                                                                                                                              | 2020-02-26 | LAUBSCHER Florian et al. et al                                                                                                       |
| Switzerland/GE4135/2020   | EPI_ISL_415705 | Hôpitaux universitaires de Genève Laboratoire de Virologie                       | Hôpitaux universitaires de Genève Laboratoire de Virologie                                                                                                                                                                 | 2020-03-06 | Laubscher F. et al                                                                                                                   |
| Switzerland/GE4644/2020   | EPI_ISL_429223 | University Hospitals of Geneva Laboratory of Virology                            | University Hospitals of Geneva Laboratory of Virology                                                                                                                                                                      | 2020-04-07 | Laubscher F. et al                                                                                                                   |
| Switzerland/GE4807/2020   | EPI_ISL_429215 | University Hospitals of Geneva Laboratory of Virology                            | University Hospitals of Geneva Laboratory of Virology                                                                                                                                                                      | 2020-03-23 | Laubscher F. et al                                                                                                                   |
| Switzerland/GE4984/2020   | EPI_ISL_415708 | Hôpitaux universitaires de Genève Laboratoire de Virologie                       | Hôpitaux universitaires de Genève Laboratoire de Virologie                                                                                                                                                                 | 2020-03-07 | Laubscher F. et al                                                                                                                   |
| Switzerland/GE5007/2020   | EPI_ISL_429206 | University Hospitals of Geneva Laboratory of Virology                            | University Hospitals of Geneva Laboratory of Virology                                                                                                                                                                      | 2020-04-07 | Laubscher F. et al                                                                                                                   |
| Switzerland/GE5373/2020   | EPI_ISL_414020 | Laboratoire de Virologie, HUG                                                    | Swiss National Reference Centre for Influenza                                                                                                                                                                              | 2020-02-27 | LAUBSCHER Florian et al. et al                                                                                                       |
| Switzerland/GE5708/2020   | EPI_ISL_429211 | University Hospitals of Geneva Laboratory of Virology                            | University Hospitals of Geneva Laboratory of Virology                                                                                                                                                                      | 2020-03-24 | Laubscher F. et al                                                                                                                   |
| Switzerland/GE5737/2020   | EPI_ISL_429200 | University Hospitals of Geneva Laboratory of Virology                            | University Hospitals of Geneva Laboratory of Virology                                                                                                                                                                      | 2020-03-19 | Laubscher F. et al                                                                                                                   |
| Switzerland/GE6065/2020   | EPI_ISL_429220 | University Hospitals of Geneva Laboratory of Virology                            | University Hospitals of Geneva Laboratory of Virology                                                                                                                                                                      | 2020-04-06 | Laubscher F. et al                                                                                                                   |
| Switzerland/GE6099/2020   | EPI_ISL_429221 | University Hospitals of Geneva Laboratory of Virology                            | University Hospitals of Geneva Laboratory of Virology                                                                                                                                                                      | 2020-04-06 | Laubscher F. et al                                                                                                                   |
| Switzerland/GE6414/2020   | EPI_ISL_429217 | University Hospitals of Geneva Laboratory of Virology                            | University Hospitals of Geneva Laboratory of Virology                                                                                                                                                                      | 2020-04-06 | Laubscher F. et al                                                                                                                   |
| Switzerland/GE6679/2020   | EPI_ISL_415707 | Hôpitaux universitaires de Genève Laboratoire de Virologie                       | Hôpitaux universitaires de Genève Laboratoire de Virologie                                                                                                                                                                 | 2020-03-08 | Laubscher F. et al                                                                                                                   |
| Switzerland/GE7617/2020   | EPI_ISL_429204 | University Hospitals of Geneva Laboratory of Virology                            | University Hospitals of Geneva Laboratory of Virology                                                                                                                                                                      | 2020-04-03 | Laubscher F. et al                                                                                                                   |
| Switzerland/GE8086/2020   | EPI_ISL_429213 | University Hospitals of Geneva Laboratory of Virology                            | University Hospitals of Geneva Laboratory of Virology                                                                                                                                                                      | 2020-03-16 | Laubscher F. et al                                                                                                                   |
| Switzerland/GE8102/2020   | EPI_ISL_415458 | Hôpitaux universitaires de Genève Laboratoire de Virologie                       | Hôpitaux universitaires de Genève Laboratoire de Virologie                                                                                                                                                                 | 2020-03-01 | Laubscher F. et al                                                                                                                   |
| Switzerland/GE8147/2020   | EPI_ISL_429210 | University Hospitals of Geneva Laboratory of Virology                            | University Hospitals of Geneva Laboratory of Virology                                                                                                                                                                      | 2020-03-16 | Laubscher F. et al                                                                                                                   |
| Switzerland/GE9586/2020   | EPI_ISL_414022 | Laboratoire de Virologie, HUG                                                    | Swiss National Reference Centre for Influenza                                                                                                                                                                              | 2020-02-27 | LAUBSCHER Florian et al. et al                                                                                                       |
| Switzerland/GR2988/2020   | EPI_ISL_415688 | Hôpitaux universitaires de Genève Laboratoire de Virologie                       | Hôpitaux universitaires de Genève Laboratoire de Virologie                                                                                                                                                                 | 2020-02-27 | Laubscher F. et al                                                                                                                   |
| Switzerland/GR3043/2020   | EPI_ISL_415699 | Hôpitaux universitaires de Genève Laboratoire de Virologie                       | Hôpitaux universitaires de Genève Laboratoire de Virologie                                                                                                                                                                 | 2020-02-27 | Laubscher F. et al                                                                                                                   |
| Switzerland/SZ1417/2020   | EPI_ISL_415702 | Hôpitaux universitaires de Genève Laboratoire de Virologie                       | Hôpitaux universitaires de Genève Laboratoire de Virologie                                                                                                                                                                 | 2020-03-02 | Laubscher F. et al                                                                                                                   |
| Switzerland/TI2045/2020   | EPI_ISL_415703 | Hôpitaux universitaires de Genève Laboratoire de Virologie                       | Hôpitaux universitaires de Genève Laboratoire de Virologie                                                                                                                                                                 | 2020-03-01 | Laubscher F. et al                                                                                                                   |
| Switzerland/TI9486/2020   | EPI_ISL_413996 | Laboratoire de Virologie, HUG                                                    | Swiss National Reference Centre for Influenza                                                                                                                                                                              | 2020-02-24 | LAUBSCHER Florian et al. et al                                                                                                       |
| Switzerland/VD0503/2020   | EPI_ISL_415459 | Hôpitaux universitaires de Genève Laboratoire de Virologie                       | Hôpitaux universitaires de Genève Laboratoire de Virologie                                                                                                                                                                 | 2020-02-29 | Laubscher F. et al                                                                                                                   |
| Switzerland/VD5615/2020   | EPI_ISL_414023 | Laboratoire de Virologie, HUG                                                    | Swiss National Reference Centre for Influenza                                                                                                                                                                              | 2020-03-01 | LAUBSCHER Florian et al. et al                                                                                                       |
| Wuhan/WH012019            | EPI_ISL_406798 | General Hospital of Central Theater Command of People's Liberation Army of China | BGI & Institute of Microbiology, Chinese Academy of Sciences & Shandong First Medical University & Shandong Academy of Medical Sciences & General Hospital of Central Theater Command of People's Liberation Army of China | 2019-12-26 | Weijun Chen et al<br><a href="https://dx.doi.org/10.1016/S0140-6736(20)30251-6">https://dx.doi.org/10.1016/S0140-6736(20)30251-6</a> |
